# Supplementary material
Source: PubMed Central journal article supplement (PMC3931332)
Supplement: ol401784h_si_002.pdf [file ol401784h_si_002.pdf]

# Gold and BINOL-Phosphoric Acid Catalyzed Enantioselective Hydroamination/*N*-Sulfonyliminium Cyclization Cascade

Alex W. Gregory,<sup>a</sup> Pavol Jakubec,<sup>a</sup> Paul Turner<sup>b</sup> and Darren J. Dixon<sup>c\*</sup>

<sup>a</sup>Chemistry Research Laboratory, University of Oxford, Mansfield Road, Oxford OX1 3TA. UK., <sup>b</sup>AstraZeneca R&D, Mereside, Alderley Park, Macclesfield, Cheshire SK10 4TG. UK., and <sup>c</sup>Chemistry Research Laboratory, University of Oxford, Mansfield Road, Oxford OX1 3TA. UK., darren.dixon@chem.ox.ac.uk

## Experimental

### (10b)

#### Crystal data

|                                   |                                                         |
|-----------------------------------|---------------------------------------------------------|
| $C_{16}H_{17}BrN_2O \cdot CHCl_3$ | $V = 1918.80 (5) \text{ \AA}^3$                         |
| $M_r = 452.60$                    | $Z = 4$                                                 |
| Orthorhombic, $P2_12_12_1$        | Mo $K\alpha$ radiation, $\lambda = 0.71073 \text{ \AA}$ |
| $a = 11.0236 (2) \text{ \AA}$     | $\mu = 2.57 \text{ mm}^{-1}$                            |
| $b = 12.9544 (2) \text{ \AA}$     | $T = 150 \text{ K}$                                     |
| $c = 13.4366 (2) \text{ \AA}$     | $0.62 \times 0.38 \times 0.30 \text{ mm}$               |

#### Data collection

|                                                                                     |                                          |
|-------------------------------------------------------------------------------------|------------------------------------------|
| Nonius KappaCCD diffractometer                                                      | 4361 independent reflections             |
| Absorption correction: Multi-scan <i>DENZO/SCALEPACK</i> (Otwinowski & Minor, 1997) | 4092 reflections with $I > 2.0\sigma(I)$ |
| $T_{\min} = 0.17$ , $T_{\max} = 0.46$                                               | $R_{\text{int}} = 0.087$                 |
| 56832 measured reflections                                                          |                                          |

#### Refinement

|                                 |                                                      |
|---------------------------------|------------------------------------------------------|
| $R[F^2 > 2\sigma(F^2)] = 0.034$ | H-atom parameters constrained                        |
| $wR(F^2) = 0.083$               | $\Delta\rho_{\max} = 0.42 \text{ e \AA}^{-3}$        |
| $S = 1.00$                      | $\Delta\rho_{\min} = -0.44 \text{ e \AA}^{-3}$       |
| 4361 reflections                | Absolute structure: Flack (1983), 1893 Friedel-pairs |
| 255 parameters                  | Flack parameter: $-0.007 (8)$                        |
| 162 restraints                  |                                                      |

**Table 1**

Selected geometric parameters ( $\text{\AA}$ ,  $^\circ$ )

|        |           |         |           |
|--------|-----------|---------|-----------|
| Br1—C2 | 1.889 (3) | N13—C14 | 1.489 (3) |
| C2—C3  | 1.391 (4) | N13—C19 | 1.349 (3) |

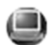

|             |           |               |             |
|-------------|-----------|---------------|-------------|
| C2—C10      | 1.384 (4) | C14—C15       | 1.534 (3)   |
| C3—N4       | 1.374 (3) | C14—C16       | 1.536 (3)   |
| C3—C7       | 1.416 (4) | C16—C17       | 1.516 (4)   |
| N4—C5       | 1.385 (3) | C17—C18       | 1.520 (4)   |
| C5—C6       | 1.374 (3) | C18—C19       | 1.507 (4)   |
| C5—C14      | 1.502 (3) | C19—O20       | 1.244 (3)   |
| C6—C7       | 1.429 (4) | C21—Cl22      | 1.738 (3)   |
| C6—C11      | 1.499 (4) | C21—Cl23      | 1.746 (3)   |
| C7—C8       | 1.415 (4) | C21—Cl24      | 1.743 (3)   |
| C8—C9       | 1.371 (5) | C25—Cl26      | 1.740 (5)   |
| C9—C10      | 1.399 (5) | C25—Cl27      | 1.743 (5)   |
| C11—C12     | 1.527 (4) | C25—Cl28      | 1.744 (5)   |
| C12—N13     | 1.477 (3) |               |             |
| Br1—C2—C3   | 119.8 (2) | C12—N13—C14   | 116.3 (2)   |
| Br1—C2—C10  | 121.2 (2) | C12—N13—C19   | 119.0 (2)   |
| C3—C2—C10   | 119.0 (3) | C14—N13—C19   | 124.7 (2)   |
| C2—C3—N4    | 130.7 (2) | C5—C14—N13    | 105.81 (19) |
| C2—C3—C7    | 121.0 (2) | C5—C14—C15    | 110.8 (2)   |
| N4—C3—C7    | 108.3 (2) | N13—C14—C15   | 110.0 (2)   |
| C3—N4—C5    | 108.0 (2) | C5—C14—C16    | 109.1 (2)   |
| N4—C5—C6    | 110.2 (2) | N13—C14—C16   | 110.1 (2)   |
| N4—C5—C14   | 122.6 (2) | C15—C14—C16   | 111.0 (2)   |
| C6—C5—C14   | 127.2 (2) | C14—C16—C17   | 111.1 (2)   |
| C5—C6—C7    | 106.6 (2) | C16—C17—C18   | 108.3 (2)   |
| C5—C6—C11   | 121.9 (2) | C17—C18—C19   | 115.2 (2)   |
| C7—C6—C11   | 131.5 (2) | C18—C19—N13   | 120.3 (2)   |
| C6—C7—C3    | 106.8 (2) | C18—C19—O20   | 118.8 (2)   |
| C6—C7—C8    | 134.0 (3) | N13—C19—O20   | 120.9 (3)   |
| C3—C7—C8    | 119.2 (3) | Cl22—C21—Cl23 | 110.61 (6)  |
| C7—C8—C9    | 118.5 (3) | Cl22—C21—Cl24 | 110.54 (6)  |
| C8—C9—C10   | 122.1 (3) | Cl23—C21—Cl24 | 110.61 (6)  |
| C9—C10—C2   | 120.1 (3) | Cl26—C25—Cl27 | 110.58 (6)  |
| C6—C11—C12  | 108.2 (2) | Cl26—C25—Cl28 | 110.60 (6)  |
| C11—C12—N13 | 110.4 (2) | Cl27—C25—Cl28 | 110.59 (6)  |

**Table 2**

Hydrogen-bond geometry (Å, °)

| <i>D</i> —H... <i>A</i>     | <i>D</i> —H | H... <i>A</i> | <i>D</i> ... <i>A</i> | <i>D</i> —H... <i>A</i> |
|-----------------------------|-------------|---------------|-----------------------|-------------------------|
| C16—H161...O20 <sup>i</sup> | 0.96        | 2.33          | 3.229 (4)             | 155 (1)                 |
| C21—H211...C7               | 0.97        | 2.55          | 3.511 (4)             | 170 (1)                 |
| C25—H211...C7               | 1.11        | 2.55          | 3.517 (4)             | 145 (1)                 |
| C25—H251...C7               | 0.98        | 2.60          | 3.517 (4)             | 157 (1)                 |
| N4—H41...O20 <sup>i</sup>   | 0.84        | 1.99          | 2.809 (4)             | 166 (1)                 |

Symmetry code: (i)  $-x+1/2, -y+1, z+1/2$ .

**(15a)**

### Crystal data

$C_{21}H_{21}BrN_2O_2S$

$M_r = 445.38$

Monoclinic,  $P2_1$

$a = 10.4507$  (1) Å

$b = 16.2752$  (2) Å

$c = 11.5043$  (1) Å

$\beta = 101.0903$  (5)°

$V = 1920.19$  (3) Å<sup>3</sup>

$Z = 4$

Mo  $K\alpha$  radiation,  $\lambda = 0.71073$  Å

$\mu = 2.27$  mm<sup>-1</sup>

$T = 150$  K

0.50 × 0.30 × 0.15 mm

### Data collection

Nonius KappaCCD  
diffractometer

Absorption correction: Multi-scan  
*DENZO/SCALEPACK* (Otwinowski & Minor,  
1997)

$T_{\min} = 0.54$ ,  $T_{\max} = 0.71$

35947 measured reflections

8412 independent reflections

7894 reflections with  $I > 2.0\sigma(I)$

$R_{\text{int}} = 0.063$

### Refinement

$R[F^2 > 2\sigma(F^2)] = 0.029$

$wR(F^2) = 0.064$

$S = 0.99$

8412 reflections

488 parameters

1 restraint

H-atom parameters constrained

$\Delta\rho_{\max} = 1.11$  e Å<sup>-3</sup>

$\Delta\rho_{\min} = -0.93$  e Å<sup>-3</sup>

Absolute structure: Flack (1983), 3898 Friedel-  
pairs

Flack parameter: 0.010 (4)

**Table 3**

Selected geometric parameters (Å, °)

|         |           |          |           |
|---------|-----------|----------|-----------|
| Br1—C2  | 1.900 (2) | Br28—C29 | 1.901 (2) |
| C2—C3   | 1.385 (3) | C29—C30  | 1.386 (4) |
| C2—C7   | 1.392 (4) | C29—C34  | 1.381 (4) |
| C3—C4   | 1.389 (3) | C30—C31  | 1.387 (4) |
| C4—C5   | 1.393 (3) | C31—C32  | 1.392 (4) |
| C4—C8   | 1.521 (3) | C32—C33  | 1.388 (3) |
| C5—C6   | 1.390 (4) | C33—C34  | 1.401 (3) |
| C6—C7   | 1.383 (4) | C33—C35  | 1.514 (3) |
| C8—N9   | 1.449 (3) | C35—N36  | 1.460 (3) |
| N9—C10  | 1.384 (3) | N36—C37  | 1.384 (3) |
| N9—C17  | 1.397 (3) | N36—C40  | 1.395 (3) |
| C10—C11 | 1.394 (3) | C37—C38  | 1.406 (3) |
| C10—C15 | 1.416 (3) | C37—C54  | 1.404 (3) |
| C11—C12 | 1.384 (4) | C38—C39  | 1.432 (3) |
| C12—C13 | 1.401 (4) | C38—C51  | 1.410 (3) |
| C13—C14 | 1.382 (4) | C39—C40  | 1.368 (3) |
| C14—C15 | 1.396 (3) | C39—C49  | 1.500 (3) |
| C15—C16 | 1.437 (3) | C40—C41  | 1.519 (3) |
| C16—C17 | 1.367 (3) | C41—N42  | 1.497 (3) |

|             |             |              |             |
|-------------|-------------|--------------|-------------|
| C16—C26     | 1.495 (3)   | C41—C47      | 1.554 (3)   |
| C17—C18     | 1.515 (3)   | C41—C50      | 1.529 (3)   |
| C18—N19     | 1.493 (3)   | N42—S43      | 1.642 (2)   |
| C18—C24     | 1.557 (3)   | N42—C48      | 1.475 (3)   |
| C18—C27     | 1.526 (3)   | S43—O44      | 1.442 (2)   |
| N19—S20     | 1.637 (2)   | S43—O45      | 1.436 (2)   |
| N19—C25     | 1.475 (3)   | S43—C46      | 1.765 (3)   |
| S20—O21     | 1.432 (2)   | C46—C47      | 1.517 (4)   |
| S20—O22     | 1.4389 (19) | C48—C49      | 1.528 (4)   |
| S20—C23     | 1.768 (3)   | C51—C52      | 1.372 (4)   |
| C23—C24     | 1.525 (4)   | C52—C53      | 1.409 (4)   |
| C25—C26     | 1.522 (3)   | C53—C54      | 1.384 (4)   |
| Br1—C2—C3   | 118.66 (18) | Br28—C29—C30 | 119.17 (19) |
| Br1—C2—C7   | 119.59 (18) | Br28—C29—C34 | 118.45 (19) |
| C3—C2—C7    | 121.7 (2)   | C30—C29—C34  | 122.4 (2)   |
| C2—C3—C4    | 119.4 (2)   | C29—C30—C31  | 118.1 (2)   |
| C3—C4—C5    | 119.7 (2)   | C30—C31—C32  | 120.5 (2)   |
| C3—C4—C8    | 117.6 (2)   | C31—C32—C33  | 120.8 (2)   |
| C5—C4—C8    | 122.8 (2)   | C32—C33—C34  | 119.0 (2)   |
| C4—C5—C6    | 119.9 (2)   | C32—C33—C35  | 123.6 (2)   |
| C5—C6—C7    | 121.1 (2)   | C34—C33—C35  | 117.4 (2)   |
| C2—C7—C6    | 118.2 (2)   | C33—C34—C29  | 119.2 (2)   |
| C4—C8—N9    | 113.68 (19) | C33—C35—N36  | 113.44 (19) |
| C8—N9—C10   | 121.95 (19) | C35—N36—C37  | 121.92 (19) |
| C8—N9—C17   | 128.4 (2)   | C35—N36—C40  | 130.2 (2)   |
| C10—N9—C17  | 108.04 (18) | C37—N36—C40  | 107.90 (19) |
| N9—C10—C11  | 129.7 (2)   | N36—C37—C38  | 108.5 (2)   |
| N9—C10—C15  | 108.5 (2)   | N36—C37—C54  | 129.4 (2)   |
| C11—C10—C15 | 121.9 (2)   | C38—C37—C54  | 122.1 (2)   |
| C10—C11—C12 | 117.1 (2)   | C37—C38—C39  | 106.6 (2)   |
| C11—C12—C13 | 121.7 (2)   | C37—C38—C51  | 118.8 (2)   |
| C12—C13—C14 | 121.0 (2)   | C39—C38—C51  | 134.6 (2)   |
| C13—C14—C15 | 118.7 (2)   | C38—C39—C40  | 107.6 (2)   |
| C10—C15—C14 | 119.5 (2)   | C38—C39—C49  | 129.2 (2)   |
| C10—C15—C16 | 106.2 (2)   | C40—C39—C49  | 123.2 (2)   |
| C14—C15—C16 | 134.1 (2)   | N36—C40—C39  | 109.4 (2)   |
| C15—C16—C17 | 107.8 (2)   | N36—C40—C41  | 124.8 (2)   |
| C15—C16—C26 | 128.5 (2)   | C39—C40—C41  | 125.7 (2)   |
| C17—C16—C26 | 123.4 (2)   | C40—C41—N42  | 107.20 (18) |
| N9—C17—C16  | 109.5 (2)   | C40—C41—C47  | 113.02 (19) |
| N9—C17—C18  | 124.5 (2)   | N42—C41—C47  | 103.86 (18) |
| C16—C17—C18 | 125.7 (2)   | C40—C41—C50  | 111.70 (19) |
| C17—C18—N19 | 107.40 (18) | N42—C41—C50  | 108.67 (19) |
| C17—C18—C24 | 112.60 (19) | C47—C41—C50  | 111.9 (2)   |
| N19—C18—C24 | 104.89 (19) | C41—N42—S43  | 113.44 (15) |
| C17—C18—C27 | 112.3 (2)   | C41—N42—C48  | 117.98 (19) |
| N19—C18—C27 | 108.10 (19) | S43—N42—C48  | 119.11 (17) |
| C24—C18—C27 | 111.1 (2)   | N42—S43—O44  | 110.06 (13) |
| C18—N19—S20 | 113.29 (15) | N42—S43—O45  | 110.16 (12) |

|             |             |             |             |
|-------------|-------------|-------------|-------------|
| C18—N19—C25 | 120.05 (18) | O44—S43—O45 | 116.07 (14) |
| S20—N19—C25 | 119.29 (16) | N42—S43—C46 | 95.66 (11)  |
| N19—S20—O21 | 109.75 (12) | O44—S43—C46 | 107.95 (13) |
| N19—S20—O22 | 109.60 (11) | O45—S43—C46 | 115.04 (14) |
| O21—S20—O22 | 116.58 (13) | S43—C46—C47 | 101.51 (17) |
| N19—S20—C23 | 95.05 (11)  | C41—C47—C46 | 106.6 (2)   |
| O21—S20—C23 | 108.72 (13) | N42—C48—C49 | 111.8 (2)   |
| O22—S20—C23 | 115.00 (13) | C48—C49—C39 | 109.4 (2)   |
| S20—C23—C24 | 100.68 (17) | C38—C51—C52 | 119.1 (2)   |
| C23—C24—C18 | 107.68 (19) | C51—C52—C53 | 121.5 (2)   |
| N19—C25—C26 | 111.43 (19) | C52—C53—C54 | 120.8 (2)   |
| C25—C26—C16 | 107.9 (2)   | C37—C54—C53 | 117.6 (2)   |

**Table 4**

Hydrogen-bond geometry (Å, °)

| D—H...A                       | D—H  | H...A | D...A     | D—H...A |
|-------------------------------|------|-------|-----------|---------|
| C12—H121...O44 <sup>i</sup>   | 0.94 | 2.54  | 3.390 (4) | 152     |
| C23—H232...O44 <sup>ii</sup>  | 0.98 | 2.51  | 3.347 (4) | 143     |
| C35—H351...O21                | 0.96 | 2.55  | 3.430 (4) | 152     |
| C46—H461...O22 <sup>iii</sup> | 0.97 | 2.50  | 3.282 (4) | 137     |

Symmetry codes: (i)  $x+1, y, z-1$ ; (ii)  $x+1, y, z$ ; (iii)  $-x+1, y-1/2, -z+1$ .

For both compounds, data collection: *COLLECT* (Nonius, 2001).; cell refinement: *DENZO/SCALEPACK* (Otwinowski & Minor, 1997); data reduction: *DENZO/SCALEPACK* (Otwinowski & Minor, 1997). Program(s) used to solve structure: Superflip (Palatinus & Chapuis, 2007) for (10b); *SIR92* (Altomare *et al.*, 1994) for (15a). For both compounds, program(s) used to refine structure: *CRYSTALS* (Betteridge *et al.*, 2003); molecular graphics: *CAMERON* (Watkin *et al.*, 1996); software used to prepare material for publication: *CRYSTALS* (Betteridge *et al.*, 2003).

## References

- Betteridge, P. W., Carruthers, J. R., Cooper, R. I., Prout, K. & Watkin, D. J. (2003). *J. Appl. Cryst.* **36**, 1487.
- Flack, H. D. (1983). *Acta Cryst.* **A39**, 876-881.
- Nonius (2001). *COLLECT*. Nonius BV, Delft, The Netherlands.
- Otwinowski, Z. & Minor, W. (1997). *Methods in Enzymology*, Vol. 276, edited by C. W. Carter Jr & R. M. Sweet, pp. 307-326. New York: Academic Press.
- Palatinus, L. & Chapuis, G. (2007). *J. Appl. Cryst.* **40**, 786-790.
- Prince, E. *Mathematical Techniques in Crystallography and Materials Science* Springer-Verlag, New York, 1982.

Watkin, D. J. (1994). *Acta Cryst.* A50, 411-437.

Watkin, D. J., Prout, C. K. & Pearce, L. J. (1996). *CAMERON*, Chemical Crystallography Laboratory, Oxford, UK.
