# Supplementary material
Source: PubMed Central journal article supplement (PMC3931332)
Supplement: ol401784h_si_003.pdf [file ol401784h_si_003.pdf]

# Gold and BINOL-Phosphoric Acid Catalyzed Enantioselective Hydroamination/N- Sulfonyliminium Cyclization Cascade

Alex W. Gregory,<sup>†</sup> Pavol Jakubec,<sup>†</sup> Paul Turner<sup>‡</sup> and Darren J. Dixon<sup>\*†</sup>

<sup>†</sup>*Department of Chemistry, Chemistry Research Laboratory, University of Oxford, Mansfield Road, Oxford OX1 3TA (UK) and <sup>‡</sup>Mereside, Alderley Park, AstraZeneca R&D Macclesfield, Cheshire SK10 4TG (UK).*

*darren.dixon@chem.ox.ac.uk*

## Contents

|         |                                                                           |        |
|---------|---------------------------------------------------------------------------|--------|
| 1.      | General Experimental .....                                                | - 8 -  |
| 2.      | Preparation and Characterisation.....                                     | - 9 -  |
| 2.1.    | Preparation and characterisation of tryptamine derivatives .....          | - 9 -  |
| 2.2.    | General procedure A for the preparation of indole carbaldehydes (17)..... | - 9 -  |
| 2.2.1.  | Preparation and characterisation of 17g .....                             | - 10 - |
| 2.2.2.  | Preparation and characterisation of 17b.....                              | - 10 - |
| 2.3.    | General procedure B for the synthesis of nitro-olefins 18 .....           | - 10 - |
| 2.3.1.  | Preparation and characterisation of 18g .....                             | - 11 - |
| 2.3.2.  | Preparation and characterisation of 18b.....                              | - 11 - |
| 2.4.    | General procedure C for the synthesis of tryptamines 19 .....             | - 12 - |
| 2.4.1.  | Preparation and characterisation of 19m.....                              | - 12 - |
| 2.4.2.  | Preparation and characterisation of 19b.....                              | - 13 - |
| 2.4.3.  | Preparation and characterisation of 20g .....                             | - 13 - |
| 2.4.4.  | Preparation and characterisation of 19g .....                             | - 14 - |
| 2.5.    | General procedure D for preparation of 5 .....                            | - 15 - |
| 2.5.1.  | Preparation and characterisation of 5a .....                              | - 15 - |
| 2.5.2.  | Preparation and characterisation of 5b.....                               | - 16 - |
| 2.5.3.  | Preparation and characterisation of 5c .....                              | - 16 - |
| 2.5.4.  | Preparation and characterisation of 5d.....                               | - 17 - |
| 2.5.5.  | Preparation and characterisation of 5e .....                              | - 17 - |
| 2.5.6.  | Preparation and characterisation of 5f.....                               | - 18 - |
| 2.5.7.  | Preparation and characterisation of 5g .....                              | - 18 - |
| 2.5.8.  | Preparation and characterisation of 5h.....                               | - 19 - |
| 2.5.9.  | Preparation and characterisation of 5i .....                              | - 20 - |
| 2.5.10. | Preparation and characterisation of 5j .....                              | - 20 - |
| 2.5.11. | Preparation and characterisation of 5k .....                              | - 21 - |
| 2.6.    | General procedure E for preparation of 6 .....                            | - 21 - |
| 2.7.    | General procedure F for preparation of racemic derivatives 6 .....        | - 22 - |
| 2.7.1.  | Preparation and characterisation of 6a .....                              | - 22 - |
| 2.7.2.  | Preparation and characterisation of 7 <sup>a</sup> .....                  | - 22 - |
| 2.7.3.  | Preparation and characterisation of 6b.....                               | - 23 - |
| 2.7.4.  | Preparation and characterisation of 6c .....                              | - 24 - |
| 2.7.5.  | Preparation and characterisation of 6d.....                               | - 24 - |
| 2.7.6.  | Preparation and characterisation of 6e .....                              | - 25 - |
| 2.7.7.  | Preparation and characterisation of 6f.....                               | - 26 - |
| 2.7.8.  | Preparation and characterisation of 6g .....                              | - 27 - |

|         |                                                                                                                                                            |        |
|---------|------------------------------------------------------------------------------------------------------------------------------------------------------------|--------|
| 2.7.9.  | Preparation and characterisation of 6h .....                                                                                                               | - 27 - |
| 2.7.1.  | Preparation and characterisation of 6i .....                                                                                                               | - 28 - |
| 2.7.2.  | Preparation and characterisation of 6j .....                                                                                                               | - 29 - |
| 2.7.3.  | Preparation and characterisation of 6k .....                                                                                                               | - 29 - |
| 2.8.    | Methodology extention for amide derivitives.....                                                                                                           | - 30 - |
| 2.9.    | General procedure G for the preparation of 9 .....                                                                                                         | - 30 - |
| 2.9.1.  | Preparation and characterisation of 9a .....                                                                                                               | - 30 - |
| 2.9.2.  | Preparation and characterisation 9b .....                                                                                                                  | - 31 - |
| 2.9.3.  | Preparation and Characterisation of 9c.....                                                                                                                | - 32 - |
| 2.9.4.  | Preparation and Characterisation of 9d .....                                                                                                               | - 32 - |
| 2.10.   | General procedure H for the racemic preparation of cyclic amides 10 .....                                                                                  | - 33 - |
| 2.11.   | General procedure I for the Enantioselective preparation of cyclic amides 10 .....                                                                         | - 33 - |
| 2.11.1. | Preparation and characterisation of 10a .....                                                                                                              | - 33 - |
| 2.11.2. | Preparation and Characterisation of 10b.....                                                                                                               | - 34 - |
| 2.11.3. | Preparation and Characterisation of 10c .....                                                                                                              | - 35 - |
| 2.11.4. | Preparation and Characterisation of 10d.....                                                                                                               | - 35 - |
| 2.12.   | Optimization, Derivative for X-ray and Control reactions. ....                                                                                             | - 36 - |
| 2.13.   | Preparation and characterisation of 14.....                                                                                                                | - 36 - |
| 2.13.1. | Mechanistic evidence for <i>N</i> -sulfonylimminium 13 .....                                                                                               | - 37 - |
| 2.13.2. | General Proceedure for optimization in the preparation of 11b-methyl-1,2,5,6,11,11b-hexahydroisothiazolo[2',3':1,2]pyrido[3,4-b]indole 3,3-dioxide 5a..... | - 37 - |
| 2.13.3. | General proceedure for optimization in the preparation of 10a.....                                                                                         | - 37 - |
| 2.13.4. | Optimisation table for the preparation of 10a. ....                                                                                                        | - 38 - |
| 2.13.5. | Preparation and characterisation of 15a .....                                                                                                              | - 38 - |
| 3.      | <sup>1</sup> HNMR and <sup>13</sup> CNMR spectra .....                                                                                                     | - 40 - |
| 3.1.    | Sulfonamide starting material 5 .....                                                                                                                      | - 40 - |
| 3.1.1.  | <sup>1</sup> HNMR spectra for <i>N</i> -[2-(1 <i>H</i> -indol-3-yl)ethyl]but-3-yne-1-sulfonamide 5a .....                                                  | - 40 - |
| 3.1.2.  | <sup>13</sup> CNMR spectra for <i>N</i> -[2-(1 <i>H</i> -indol-3-yl)ethyl]but-3-yne-1-sulfonamide 5a .....                                                 | - 40 - |
| 3.1.3.  | <sup>1</sup> HNMR spectra for <i>N</i> -[2-(4-chloro-1 <i>H</i> -indol-3-yl)ethyl]but-3-yne-1-sulfonamide 5b .....                                         | - 41 - |
| 3.1.4.  | <sup>13</sup> CNMR spectra for <i>N</i> -[2-(4-chloro-1 <i>H</i> -indol-3-yl)ethyl]but-3-yne-1-sulfonamide 5b .....                                        | - 41 - |
| 3.1.5.  | <sup>1</sup> HNMR spectra for <i>N</i> -[2-(5-bromo-1 <i>H</i> -indol-3-yl)ethyl]but-3-yne-1-sulfonamide 5c .....                                          | - 42 - |
| 3.1.6.  | <sup>13</sup> CNMR spectra for <i>N</i> -[2-(5-bromo-1 <i>H</i> -indol-3-yl)ethyl]but-3-yne-1-sulfonamide 5c .....                                         | - 42 - |
| 3.1.7.  | <sup>1</sup> HNMR spectra for <i>N</i> -[2-(6-bromo-1 <i>H</i> -indol-3-yl)ethyl]but-3-yne-1-sulfonamide 5d.....                                           | - 43 - |
| 3.1.8.  | <sup>13</sup> CNMR spectra for <i>N</i> -[2-(6-bromo-1 <i>H</i> -indol-3-yl)ethyl]but-3-yne-1-sulfonamide 5d.....                                          | - 43 - |
| 3.1.9.  | <sup>1</sup> HNMR spectra for <i>N</i> -[2-(5-fluoro-1 <i>H</i> -indol-3-yl)ethyl]but-3-yne-1-sulfonamide 5e.....                                          | - 44 - |
| 3.1.10. | <sup>13</sup> CNMR spectra for <i>N</i> -[2-(5-fluoro-1 <i>H</i> -indol-3-yl)ethyl]but-3-yne-1-sulfonamide 5e .....                                        | - 44 - |
| 3.1.11. | <sup>1</sup> HNMR spectra for <i>N</i> -[2-(6-fluoro-1 <i>H</i> -indol-3-yl)ethyl]but-3-yne-1-sulfonamide 5f.....                                          | - 45 - |

|         |                                                                                                                                                     |        |
|---------|-----------------------------------------------------------------------------------------------------------------------------------------------------|--------|
| 3.1.12. | <sup>13</sup> CNMR spectra for <i>N</i> -[2-(6-fluoro-1 <i>H</i> -indol-3-yl)ethyl]but-3-yne-1-sulfonamide 5f.....                                  | - 45 - |
| 3.1.13. | <sup>1</sup> HNMR spectra for <i>N</i> -[2-(5-cyano-1 <i>H</i> -indol-3-yl)ethyl]but-3-yne-1-sulfonamide 5g.....                                    | - 46 - |
| 3.1.14. | <sup>13</sup> CNMR spectra for <i>N</i> -[2-(5-cyano-1 <i>H</i> -indol-3-yl)ethyl]but-3-yne-1-sulfonamide 5g.....                                   | - 46 - |
| 3.1.15. | <sup>1</sup> HNMR spectra for <i>N</i> -[2-(5-methoxy-1 <i>H</i> -indol-3-yl)ethyl]but-3-yne-1-sulfonamide 5h.....                                  | - 47 - |
| 3.1.16. | <sup>13</sup> CNMR spectra for <i>N</i> -[2-(5-methoxy-1 <i>H</i> -indol-3-yl)ethyl]but-3-yne-1-sulfonamide 5h.....                                 | - 47 - |
| 3.1.17. | <sup>1</sup> HNMR spectra for <i>N</i> -[2-(5-methyl-1 <i>H</i> -indol-3-yl)ethyl]but-3-yne-1-sulfonamide 5i.....                                   | - 48 - |
| 3.1.18. | <sup>13</sup> CNMR spectra for <i>N</i> -[2-(5-methyl-1 <i>H</i> -indol-3-yl)ethyl]but-3-yne-1-sulfonamide 5i.....                                  | - 48 - |
| 3.1.19. | <sup>1</sup> HNMR spectra for <i>N</i> -[2-(7-methyl-1 <i>H</i> -indol-3-yl)ethyl]but-3-yne-1-sulfonamide 5j.....                                   | - 49 - |
| 3.1.20. | <sup>13</sup> CNMR spectra for <i>N</i> -[2-(7-methyl-1 <i>H</i> -indol-3-yl)ethyl]but-3-yne-1-sulfonamide 5j.....                                  | - 49 - |
| 3.1.21. | <sup>1</sup> HNMR spectra for <i>N</i> -[2-(7-ethyl-1 <i>H</i> -indol-3-yl)ethyl]but-3-yne-1-sulfonamide 5k.....                                    | - 50 - |
| 3.1.22. | <sup>13</sup> CNMR spectra for <i>N</i> -[2-(7-ethyl-1 <i>H</i> -indol-3-yl)ethyl]but-3-yne-1-sulfonamide 5k.....                                   | - 50 - |
| 3.2.    | Sulfonamide cyclization products.....                                                                                                               | - 51 - |
| 3.2.1.  | <sup>1</sup> HNMR spectra for 11b-methyl-1,2,5,6,11,11b-hexahydroisothiazolo[2',3':1,2]pyrido[3,4- <i>b</i> ]indole-3,3-dioxide 6a.....             | - 51 - |
| 3.2.2.  | <sup>13</sup> CNMR spectra for 11b-methyl-1,2,5,6,11,11b-hexahydroisothiazolo[2',3':1,2]pyrido[3,4- <i>b</i> ]indole 3,3-dioxide 6a.....            | - 51 - |
| 3.2.3.  | <sup>1</sup> HNMR spectra for 2,3,6,7,12,12b-hexahydro-1 <i>H</i> -[1,2]thiazino[2',3':1,2]pyrido[3,4- <i>b</i> ]indole 4,4-dioxide 7a ...          | - 52 - |
| 3.2.4.  | <sup>13</sup> CNMR spectra for 2,3,6,7,12,12b-hexahydro-1 <i>H</i> -[1,2]thiazino[2',3':1,2]pyrido[3,4- <i>b</i> ]indole 4,4-dioxide 7a ...         | - 52 - |
| 3.2.5.  | <sup>1</sup> HNMR spectra for 7-chloro-11b-methyl-1,2,5,6,11,11b-hexahydro[1,2]thiazolo[2',3':1,2]pyrido[3,4- <i>b</i> ]indole 3,3-dioxide 6b.....  | - 53 - |
| 3.2.6.  | <sup>13</sup> CNMR spectra for 7-chloro-11b-methyl-1,2,5,6,11,11b-hexahydro[1,2]thiazolo[2',3':1,2]pyrido[3,4- <i>b</i> ]indole 3,3-dioxide 6b..... | - 53 - |
| 3.2.7.  | <sup>1</sup> HNMR spectra for 8-bromo-11b-methyl-1,2,5,6,11,11b-hexahydro[1,2]thiazolo[2',3':1,2]pyrido[3,4- <i>b</i> ]indole 3,3-dioxide 6c.....   | - 54 - |
| 3.2.8.  | <sup>13</sup> CNMR spectra for 8-bromo-11b-methyl-1,2,5,6,11,11b-hexahydro[1,2]thiazolo[2',3':1,2]pyrido[3,4- <i>b</i> ]indole 3,3-dioxide 6c.....  | - 54 - |
| 3.2.9.  | <sup>1</sup> HNMR spectra for 9-bromo-11b-methyl-1,2,5,6,11,11b-hexahydro[1,2]thiazolo[2',3':1,2]pyrido[3,4- <i>b</i> ]indole 3,3-dioxide 6d.....   | - 55 - |
| 3.2.10. | <sup>13</sup> CNMR spectra for 9-bromo-11b-methyl-1,2,5,6,11,11b-hexahydro[1,2]thiazolo[2',3':1,2]pyrido[3,4- <i>b</i> ]indole 3,3-dioxide 6d.....  | - 55 - |
| 3.2.11. | <sup>1</sup> HNMR spectra for 8-fluoro-11b-methyl-1,2,5,6,11,11b-hexahydro[1,2]thiazolo[2',3':1,2]pyrido[3,4- <i>b</i> ]indole 3,3-dioxide 6e.....  | - 56 - |
| 3.2.12. | <sup>13</sup> CNMR spectra for 8-fluoro-11b-methyl-1,2,5,6,11,11b-hexahydro[1,2]thiazolo[2',3':1,2]pyrido[3,4- <i>b</i> ]indole 3,3-dioxide 6e..... | - 56 - |
| 3.2.13. | <sup>1</sup> HNMR spectra for 9-fluoro-11b-methyl-1,2,5,6,11,11b-hexahydro[1,2]thiazolo[2',3':1,2]pyrido[3,4- <i>b</i> ]indole 3,3-dioxide 6f.....  | - 57 - |
| 3.2.14. | <sup>13</sup> CNMR spectra for 9-fluoro-11b-methyl-1,2,5,6,11,11b-hexahydro[1,2]thiazolo[2',3':1,2]pyrido[3,4- <i>b</i> ]indole 3,3-dioxide 6f..... | - 57 - |

|         |                                                                                                                                                   |        |
|---------|---------------------------------------------------------------------------------------------------------------------------------------------------|--------|
| 3.2.15. | <sup>1</sup> HNMR spectra for 11b-methyl-1,2,5,6,11,11b-hexahydro[1,2]thiazolo[2',3':1,2]pyrido[3,4-b]indole-8-carbonitrile 3,3-dioxide 6g .....  | - 58 - |
| 3.2.16. | <sup>13</sup> CNMR spectra for 11b-methyl-1,2,5,6,11,11b-hexahydro[1,2]thiazolo[2',3':1,2]pyrido[3,4-b]indole-8-carbonitrile 3,3-dioxide 6g ..... | - 58 - |
| 3.2.17. | <sup>1</sup> HNMR spectra for 8-methoxy-11b-methyl-1,2,5,6,11,11b-hexahydro[1,2]thiazolo[2',3':1,2]pyrido[3,4-b]indole 3,3-dioxide 6h .....       | - 59 - |
| 3.2.18. | <sup>13</sup> CNMR spectra for 8-methoxy-11b-methyl-1,2,5,6,11,11b-hexahydro[1,2]thiazolo[2',3':1,2]pyrido[3,4-b]indole 3,3-dioxide 6h .....      | - 59 - |
| 3.2.1.  | <sup>1</sup> HNMR spectra for 8,11b-dimethyl-1,2,5,6,11,11b-hexahydro[1,2]thiazolo[2',3':1,2]pyrido[3,4-b]indole 3,3-dioxide 6i .....             | - 60 - |
| 3.2.2.  | <sup>13</sup> CNMR spectra for 8,11b-dimethyl-1,2,5,6,11,11b-hexahydro[1,2]thiazolo[2',3':1,2]pyrido[3,4-b]indole 3,3-dioxide 6i .....            | - 60 - |
| 3.2.3.  | <sup>1</sup> HNMR spectra for 10,11b-dimethyl-1,2,5,6,11,11b-hexahydro[1,2]thiazolo[2',3':1,2]pyrido[3,4-b]indole 3,3-dioxide 6j .....            | - 61 - |
| 3.2.4.  | <sup>13</sup> CNMR spectra for 10,11b-dimethyl-1,2,5,6,11,11b-hexahydro[1,2]thiazolo[2',3':1,2]pyrido[3,4-b]indole 3,3-dioxide 6j .....           | - 61 - |
| 3.2.5.  | <sup>1</sup> HNMR spectra for 10-ethyl-11b-methyl-1,2,5,6,11,11b-hexahydro[1,2]thiazolo[2',3':1,2]pyrido[3,4-b]indole 3,3-dioxide 6k .....        | - 62 - |
| 3.2.6.  | <sup>13</sup> CNMR spectra for 10-ethyl-11b-methyl-1,2,5,6,11,11b-hexahydro[1,2]thiazolo[2',3':1,2]pyrido[3,4-b]indole 3,3-dioxide 6k .....       | - 62 - |
| 3.3.    | Amide starting material .....                                                                                                                     | - 63 - |
| 3.3.1.  | <sup>1</sup> HNMR spectra for <i>N</i> -[2-(1 <i>H</i> -indol-3-yl)ethyl]hex-5-ynamide 9a .....                                                   | - 63 - |
| 3.3.2.  | <sup>13</sup> CNMR spectra for <i>N</i> -[2-(1 <i>H</i> -indol-3-yl)ethyl]hex-5-ynamide 9a .....                                                  | - 63 - |
| 3.3.3.  | <sup>1</sup> HNMR spectra for <i>N</i> -[2-(7-bromo-1 <i>H</i> -indol-3-yl)ethyl]hex-5-ynamide 9b .....                                           | - 64 - |
| 3.3.4.  | <sup>13</sup> CNMR spectra for <i>N</i> -[2-(7-bromo-1 <i>H</i> -indol-3-yl)ethyl]hex-5-ynamide 9b .....                                          | - 64 - |
| 3.3.5.  | <sup>1</sup> HNMR spectra for <i>N</i> -[2-(7-methyl-1 <i>H</i> -indol-3-yl)ethyl]hex-5-ynamide 9c .....                                          | - 65 - |
| 3.3.6.  | <sup>13</sup> CNMR spectra for <i>N</i> -[2-(7-methyl-1 <i>H</i> -indol-3-yl)ethyl]hex-5-ynamide 9c .....                                         | - 65 - |
| 3.3.7.  | <sup>1</sup> HNMR spectra for <i>N</i> -[2-(7-ethyl-1 <i>H</i> -indol-3-yl)ethyl]hex-5-ynamide 9d .....                                           | - 66 - |
| 3.3.8.  | <sup>13</sup> CNMR spectra for <i>N</i> -[2-(7-ethyl-1 <i>H</i> -indol-3-yl)ethyl]hex-5-ynamide 9d .....                                          | - 66 - |
| 3.4.    | Amide cyclization products .....                                                                                                                  | - 67 - |
| 3.4.1.  | <sup>1</sup> HNMR spectra for 12b-methyl-2,3,6,7,12,12b-hexahydroindolo[2,3- <i>a</i> ]quinolizin-4(1 <i>H</i> )-one 10a .....                    | - 67 - |
| 3.4.2.  | <sup>13</sup> CNMR spectra for 12b-methyl-2,3,6,7,12,12b-hexahydroindolo[2,3- <i>a</i> ]quinolizin-4(1 <i>H</i> )-one 10a .....                   | - 67 - |
| 3.4.3.  | <sup>1</sup> HNMR spectra for 11-bromo-12b-methyl-2,3,6,7,12,12b-hexahydroindolo[2,3- <i>a</i> ]quinolizin-4(1 <i>H</i> )-one 10b .. - 68 -       |        |
| 3.4.4.  | <sup>13</sup> CNMR spectra for 11-bromo-12b-methyl-2,3,6,7,12,12b-hexahydroindolo[2,3- <i>a</i> ]quinolizin-4(1 <i>H</i> )-one 10b . - 68 -       |        |
| 3.4.5.  | <sup>1</sup> HNMR spectra for 11,12b-dimethyl-2,3,6,7,12,12b-hexahydroindolo[2,3- <i>a</i> ]quinolizin-4(1 <i>H</i> )-one 10c .....               | - 69 - |
| 3.4.6.  | <sup>13</sup> CNMR spectra for 11,12b-dimethyl-2,3,6,7,12,12b-hexahydroindolo[2,3- <i>a</i> ]quinolizin-4(1 <i>H</i> )-one 10c .....              | - 69 - |
| 3.4.7.  | <sup>1</sup> HNMR spectra for 11-ethyl-12b-methyl-2,3,6,7,12,12b-hexahydroindolo[2,3- <i>a</i> ]quinolizin-4(1 <i>H</i> )-one 10d - 70 -          |        |

|         |                                                                                                                                                          |        |
|---------|----------------------------------------------------------------------------------------------------------------------------------------------------------|--------|
| 3.4.8.  | <sup>13</sup> CNMR spectra for 11-ethyl-12b-methyl-2,3,6,7,12,12b-hexahydroindolo[2,3- <i>a</i> ]quinolizin-4(1 <i>H</i> )-one 10d                       | - 70 - |
| 3.4.9.  | <sup>1</sup> HNMR spectra for <i>N</i> -[2-(1 <i>H</i> -indole-3-yl)ethyl]-3-oxobutane-1-sulfonamide 14                                                  | - 71 - |
| 3.4.10. | <sup>13</sup> CNMR spectra for <i>N</i> -[2-(1 <i>H</i> -indole-3-yl)ethyl]-3-oxobutane-1-sulfonamide 14                                                 | - 71 - |
| 3.4.11. | <sup>1</sup> HNMR spectra for 11-(3-bromobenzyl)-11b-methyl-1,2,5,6,11,11b-hexahydro[1,2]thiazolo[2',3':1,2]pyrido[3,4- <i>b</i> ]indole 3,3-dioxide 15a | - 72 - |
| 3.4.12. | <sup>1</sup> HNMR spectra for 11-(3-bromobenzyl)-11b-methyl-1,2,5,6,11,11b-hexahydro[1,2]thiazolo[2',3':1,2]pyrido[3,4- <i>b</i> ]indole 3,3-dioxide 15a | - 72 - |
| 4.      | HPLC reports                                                                                                                                             | - 73 - |
| 4.1.    | Sulfonamide cyclization products                                                                                                                         | - 73 - |
| 4.1.1.  | HPLC trace of racemic 11b-methyl-1,2,5,6,11,11b-hexahydroisothiazolo[2',3':1,2]pyrido[3,4- <i>b</i> ]indole 3,3-dioxide 6a                               | - 73 - |
| 4.1.2.  | HPLC trace of 11b-methyl-1,2,5,6,11,11b-hexahydroisothiazolo[2',3':1,2]pyrido[3,4- <i>b</i> ]indole 3,3-dioxide 6a                                       | - 73 - |
| 4.1.3.  | HPLC trace of 11b-methyl-1,2,5,6,11,11b-hexahydroisothiazolo[2',3':1,2]pyrido[3,4- <i>b</i> ]indole 3,3-dioxide from ketone starting material 6a         | - 74 - |
| 4.1.4.  | HPLC trace of Racemic 7-chloro-11b-methyl-1,2,5,6,11,11b-hexahydro[1,2]thiazolo[2',3':1,2]pyrido[3,4- <i>b</i> ]indole 3,3-dioxide 6b                    | - 75 - |
| 4.1.5.  | HPLC trace of 7-chloro-11b-methyl-1,2,5,6,11,11b-hexahydro[1,2]thiazolo[2',3':1,2]pyrido[3,4- <i>b</i> ]indole 3,3-dioxide 6b                            | - 75 - |
| 4.1.6.  | HPLC trace of racemic 8-bromo-11b-methyl-1,2,5,6,11,11b-hexahydroisothiazolo[2',3':1,2]pyrido[3,4- <i>b</i> ]indole 3,3-dioxide 6c                       | - 76 - |
| 4.1.7.  | HPLC trace 8-bromo-11b-methyl-1,2,5,6,11,11b-hexahydroisothiazolo[2',3':1,2]pyrido[3,4- <i>b</i> ]indole 3,3-dioxide 6c                                  | - 76 - |
| 4.1.8.  | HPLC trace of Racemic 9-bromo-11b-methyl-1,2,5,6,11,11b-hexahydro[1,2]thiazolo[2',3':1,2]pyrido[3,4- <i>b</i> ]indole 3,3-dioxide 6d                     | - 77 - |
| 4.1.9.  | HPLC trace of 9-bromo-11b-methyl-1,2,5,6,11,11b-hexahydro[1,2]thiazolo[2',3':1,2]pyrido[3,4- <i>b</i> ]indole 3,3-dioxide 6d                             | - 77 - |
| 4.1.10. | HPLC trace of Racemic 8-fluoro-11b-methyl-1,2,5,6,11,11b-hexahydro[1,2]thiazolo[2',3':1,2]pyrido[3,4- <i>b</i> ]indole 3,3-dioxide 6e                    | - 78 - |
| 4.1.11. | HPLC trace of 8-fluoro-11b-methyl-1,2,5,6,11,11b-hexahydro[1,2]thiazolo[2',3':1,2]pyrido[3,4- <i>b</i> ]indole 3,3-dioxide 6e                            | - 78 - |
| 4.1.12. | HPLC trace of Racemic 9-fluoro-11b-methyl-1,2,5,6,11,11b-hexahydro[1,2]thiazolo[2',3':1,2]pyrido[3,4- <i>b</i> ]indole 3,3-dioxide 6f                    | - 79 - |
| 4.1.13. | HPLC trace of 9-fluoro-11b-methyl-1,2,5,6,11,11b-hexahydro[1,2]thiazolo[2',3':1,2]pyrido[3,4- <i>b</i> ]indole 3,3-dioxide 6f                            | - 79 - |
| 4.1.14. | HPLC trace of Racemic 11b-methyl-1,2,5,6,11,11b-hexahydro[1,2]thiazolo[2',3':1,2]pyrido[3,4- <i>b</i> ]indole-8-carbonitrile 3,3-dioxide 6g              | - 80 - |
| 4.1.15. | HPLC trace of 11b-methyl-1,2,5,6,11,11b-hexahydro[1,2]thiazolo[2',3':1,2]pyrido[3,4- <i>b</i> ]indole-8-carbonitrile 3,3-dioxide 6g                      | - 80 - |
| 4.1.16. | HPLC trace of 8-methoxy-11b-methyl-1,2,5,6,11,11b-hexahydro[1,2]thiazolo[2',3':1,2]pyrido[3,4- <i>b</i> ]indole 3,3-dioxide 6h                           | - 81 - |

|         |                                                                                                                                              |         |
|---------|----------------------------------------------------------------------------------------------------------------------------------------------|---------|
| 4.1.17. | HPLC trace of 8-methoxy-11b-methyl-1,2,5,6,11,11b-hexahydro[1,2]thiazolo[2',3':1,2]pyrido[3,4-b]indole 3,3-dioxide 6h .....                  | - 81 -  |
| 4.1.18. | HPLC trace of Racemic 8,11b-dimethyl-1,2,5,6,11,11b-hexahydro[1,2]thiazolo[2',3':1,2]pyrido[3,4-b]indole 3,3-dioxide 6i .....                | - 82 -  |
| 4.1.19. | HPLC trace of 8,11b-dimethyl-1,2,5,6,11,11b-hexahydro[1,2]thiazolo[2',3':1,2]pyrido[3,4-b]indole 3,3-dioxide 6i - 82 -                       |         |
| 4.1.20. | HPLC trace of Racemic 10,11b-dimethyl-1,2,5,6,11,11b-hexahydro[1,2]thiazolo[2',3':1,2]pyrido[3,4-b]indole 3,3-dioxide 6j .....               | - 83 -  |
| 4.1.21. | HPLC trace of 10,11b-dimethyl-1,2,5,6,11,11b-hexahydro[1,2]thiazolo[2',3':1,2]pyrido[3,4-b]indole 3,3-dioxide 6j - 83 -                      |         |
| 4.1.22. | HPLC trace of Racemic 10-ethyl-11b-methyl-1,2,5,6,11,11b-hexahydro[1,2]thiazolo[2',3':1,2]pyrido[3,4-b]indole 3,3-dioxide 6k .....           | - 84 -  |
| 4.1.23. | HPLC trace of 10-ethyl-11b-methyl-1,2,5,6,11,11b-hexahydro[1,2]thiazolo[2',3':1,2]pyrido[3,4-b]indole 3,3-dioxide 6k.....                    | - 84 -  |
| 4.2.    | Amide cyclization products.....                                                                                                              | - 86 -  |
| 4.2.1.  | HPLC trace of Racemic 11-bromo-12b-methyl-2,3,6,7,12,12b-hexahydroindolo[2,3-a]quinolizin-4(1H)-one 10b - 86 -                               |         |
| 4.2.2.  | HPLC trace of 11-bromo-12b-methyl-2,3,6,7,12,12b-hexahydroindolo[2,3-a]quinolizin-4(1H)-one 10b ....                                         | - 86 -  |
| 4.2.3.  | HPLC trace of racemic 11,12b-dimethyl-2,3,6,7,12,12b-hexahydroindolo[2,3-a]quinolizin-4(1H)-one 10c - 87 -                                   |         |
| 4.2.4.  | HPLC trace of 11,12b-dimethyl-2,3,6,7,12,12b-hexahydroindolo[2,3-a]quinolizin-4(1H)-one 10c.....                                             | - 87 -  |
| 4.2.5.  | HPLC trace of racemic 11-ethyl-12b-methyl-2,3,6,7,12,12b-hexahydroindolo[2,3-a]quinolizin-4(1H)-one 10d - 88 -                               |         |
| 4.2.6.  | HPLC trace of 11-ethyl-12b-methyl-2,3,6,7,12,12b-hexahydroindolo[2,3-a]quinolizin-4(1H)-one 10d.....                                         | - 88 -  |
| 4.2.7.  | HPLC trace of racemic 11-(3-bromobenzyl)-11b-methyl-1,2,5,6,11,11b-hexahydro[1,2]thiazolo[2',3':1,2]pyrido[3,4-b]indole 3,3-dioxide 15a..... | - 89 -  |
| 4.2.8.  | HPLC trace of 11-(3-bromobenzyl)-11b-methyl-1,2,5,6,11,11b-hexahydro[1,2]thiazolo[2',3':1,2]pyrido[3,4-b]indole 3,3-dioxide 15a .....        | - 89 -  |
| 5.      | Xray Data.....                                                                                                                               | - 90 -  |
| 5.1.    | X-ray data for compound 10b.....                                                                                                             | - 90 -  |
| 5.2.    | X-Ray data for compound 15a .....                                                                                                            | - 95 -  |
| 5.3.    | X-ray references .....                                                                                                                       | - 103 - |
| 6.      | References .....                                                                                                                             | - 103 - |

## 1. General Experimental

### General Experimental Techniques

For reactions requiring anhydrous conditions, glassware was dried in an oven at 100 °C and reactions were carried out under a nitrogen or argon atmosphere. Room temperature (rt) refers to 20-25 °C. Temperatures of 0 °C were achieved using an ice-bath. All compounds were named using ACD IUPAC name predictor.

### Solvents and Reagents

Commercial reagents were used as purchased without any further purification unless otherwise stated. Chiral Brønsted acids (**BPA-1A** to **BPA-1D** and **BPA-2A**) were synthesised by Dr Michael Muratore and Dr Lie Shi following standard literature procedure.<sup>1,2,3</sup> Bulk solutions were concentrated under reduced pressure using a Büchi rotary evaporator. Anhydrous toluene, tetrahydrofuran and dichloromethane were obtained by filtration through activated alumina (powder ~150 mesh, pore size 58Å, basic, Sigma-Aldrich) columns. Dichloroethane and acetonitrile were distilled over calcium hydride. Petroleum ether (PE) refers to distilled light petroleum with boiling points in the range of 40 °C – 60 °C. Tryptamine derivatives 2-(1*H*-indol-3-yl)ethanamine, 2-(5-methyl-1*H*-indol-3-yl)ethanamine and 2-(5-methoxy-1*H*-indol-3-yl)ethanamine were used as provided from commercial suppliers. Known tryptamine derivatives were made following literature methods.<sup>4,5,6</sup> 5-cyano-tryptamine, 4-chloro-tryptamine and 7-bromo-tryptamine were synthesised as described.

### Chromatography

All reactions were monitored by thin-layer chromatography (TLC) where appropriate using Merck Kiesel gel 60 F<sub>254</sub> (230-400 mesh) silica plates which were visualised by UV-light (250 nm) or by staining using aqueous potassium permanganate solutions or vanillin, sulphuric acid in ethanol where appropriate. Column chromatography was carried out using Merck Kieselgel 60 silica gel (230-400 mesh). Enantiomeric excesses were determined using high performance liquid chromatography (HPLC) performed on a Hewlett-Packard 1050 Series system or Agilent 1200 Series system (column and solvent conditions are given with the compound).

### Spectroscopy and Characterisation

All <sup>1</sup>H and <sup>13</sup>C nuclear magnetic resonance (NMR) spectra were collected on either a Bruker DPX400 (400 MHz <sup>1</sup>H, 100 MHz <sup>13</sup>C), Bruker DQX400 (400 MHz <sup>1</sup>H, 100 MHz <sup>13</sup>C) or Bruker AVC500 (500 MHz <sup>1</sup>H, 125 MHz <sup>13</sup>C) and in the deuterated solvent stated. Chemical shift values (δ) are reported relative to tetramethylsilane (δ = 0 ppm) using the solvent residual as an internal reference. <sup>1</sup>HNMR peak splitting (multiplicity) and coupling constants are quoted as seen in the spectra and are not compared to theoretically expected multiplicity. Assignments were aided by COSY and HSQC experiments.

Low resolution mass spectrometric (*m/z*) data was acquired by electrospray ionisation (ESI) on an LCT Premier instrument.. High resolution mass spectra (accurate mass) were recorded on a Bruker Micromass GCT spectrometer.

Infrared spectra ( $\nu_{\max}$ ) were recorded (wavenumber cm<sup>-1</sup>) from a thin film on a PIKE diamond ATR module. Only selected maximum absorbances are reported.



Optical rotations were recorded using an Optical Activity AA-1000 polarimeter or a Perkin-Elmer 241 polarimeter; specific rotation (SR) ( $[\alpha]_D^T$ ) are reported in  $10^{-1} \text{ deg.cm}^2.\text{g}^{-1}$ ; concentrations ( $c$ ) are quoted in g/100 ml;  $D$  refers to the  $D$ -line of sodium (589 nm); Temperatures ( $T$ ) are given in degrees Celsius ( $^{\circ}\text{C}$ ).

Melting points were measured on a Leica Galen III microscope apparatus, samples were measured mounted on a cover glass window.

## 2. Preparation and Characterisation

### 2.1. Preparation and characterisation of tryptamine derivatives

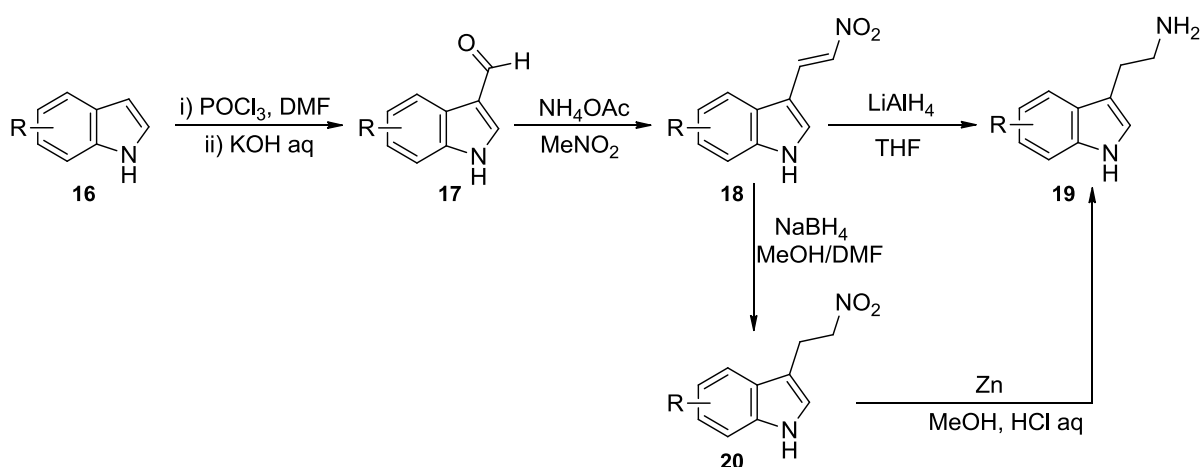

### 2.2. General procedure A for the preparation of indole carbaldehydes (17)

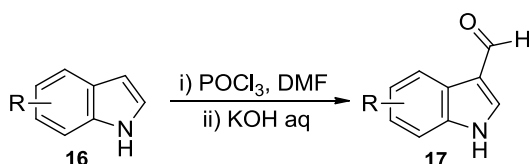

Phosphorus oxychloride (2.5 eq) was added dropwise to dry dimethyl formamide (5 ml per 1 ml of  $\text{POCl}_3$ ) with ice-bath cooling under nitrogen. The mixture was stirred for 5 minutes before the chosen indole (1 equivalent) was added in dimethyl formamide (10 ml per 1 g of indole). The mixture was then allowed to warm to room temperature and stirred for 3 hours. The reaction became a thick suspension that required vigorous stirring. Potassium hydroxide solution (3.8 M, 10 eq) was added *via* dropping funnel and the mixture was heated at reflux for 14-16h. The solution was cooled to room temperature before adding a saturated sodium hydrogen carbonate solution and ethyl acetate until the mixture became clear and the organic layer was separated. The aqueous layer was extracted with ethyl acetate and the combined organic layers were dried over sodium sulphate, filtered and concentrated *in vacuo* to furnish the desired aldehyde that required no further purification.

### 2.2.1. Preparation and characterisation of 17g

#### 3-formyl-1H-indole-5-carbonitrile

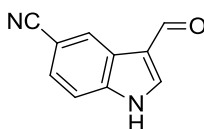

The title compound **17g** was synthesised according to general procedure **A** in 97% yield as an off white solid.

**m.p.** 230-233 °C; **FT-IR**  $\nu_{\max}$  3207 (N-H), 2221 (C≡N), 1648 (C=O); **<sup>1</sup>H NMR** ( $d_6$ -DMSO, 400 MHz)  $\delta_{\text{H}}$  12.54 (br s, 1H, ArNH), 9.99 (s, 1H, ArCHO), 8.49 (s, 1H, ArCH), 8.45 (d, 1H, ArCH,  $J$  2.0 Hz), 7.69 (d, 1H, ArCH,  $J$  8.5 Hz), 7.62 (dd, 1H, ArCH,  $J$  8.5 Hz, 2.0 Hz); **<sup>13</sup>C NMR** ( $d_6$ -DMSO, 100 MHz)  $\delta_{\text{C}}$  186.2 (C=O), 141.1 (ArCH), 139.7 (ArC<sub>quat</sub>), 127.2 (ArCH), 126.6 (ArCH), 124.8 (ArC<sub>quat</sub>), 120.8 (ArC<sub>quat</sub>), 118.9 (ArCN), 114.8 (ArCH), 105.2 (ArC<sub>quat</sub>);  **$m/z$**  (ES<sup>-</sup>) 169 ([M-H]<sup>-</sup>, 100%), **HRMS** (ES<sup>+</sup>) exact mass calculated for [M+Na]<sup>+</sup> (C<sub>10</sub>H<sub>6</sub>N<sub>2</sub>NaO<sup>+</sup>) requires  $m/z$  193.0372, found 193.0368.

---

### 2.2.2. Preparation and characterisation of 17b

#### 4-chloro-1H-indole-3-carbaldehyde

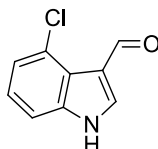

The title compound **17b** was synthesised according to general procedure **A** in 85% yield as a light brown solid.

**m.p.** 147-148 °C; **FT-IR**  $\nu_{\max}$  1636 (C=O); **<sup>1</sup>H NMR** ( $d_6$ -DMSO, 400 MHz)  $\delta_{\text{H}}$  12.57 (br s, 1H, ArNH), 10.49 (s, 1H, CHO), 8.30 (s, 1H, ArCH), 7.52 (d, 1H, ArCH,  $J$  8.0 Hz), 7.30 (d, 1H, ArCH,  $J$  8.0 Hz), 7.23 (t, 1H, ArCH,  $J$  8.0 Hz); **<sup>13</sup>C NMR** ( $d_6$ -DMSO, 125 MHz)  $\delta_{\text{C}}$  185.6 (C=O), 139.1 (ArC<sub>quat</sub>), 134.9 (ArCH), 125.4 (ArC<sub>quat</sub>), 124.4 (ArCH), 123.8 (ArC<sub>quat</sub>), 123.4 (ArCH), 118.7 (ArC<sub>quat</sub>), 112.8 (ArCH);  **$m/z$**  (ES<sup>-</sup>) 178 ([M-H]<sup>-</sup>, 100%), **HRMS** (ES<sup>-</sup>) exact mass calculated for [M-H]<sup>-</sup> (C<sub>9</sub>H<sub>5</sub>ClNO<sup>-</sup>) requires  $m/z$  178.0065 & 180.0036 found  $m/z$  178.0065 & 180.0033.

---

## 2.3. General procedure B for the synthesis of nitro-olefins 18

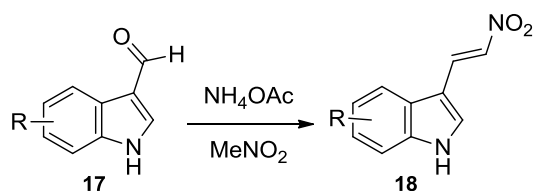

A mixture of the corresponding aldehyde **17** (1 eq), and ammonium acetate (dried under reduced pressure until the crystals became free flowing) (3 eq) in nitromethane (20 ml per 1 g of aldehyde) were heated at reflux under nitrogen for 1 hour (behind a blast shield). The reaction mixture was then allowed to cool to room temperature. **Two purification methods: 1)** The solvent was removed *in vacuo* and the residue washed with water and filtered. The filtration cake was pre-absorbed onto silica gel and purified by flash column chromatography (PE:ethyl acetate, 2:1) to furnish the desired nitro-olefin. **2)** The reaction was allowed to cool to room temperature and left to crystallize for 14-16 h. The solid was filtered, washed with water and dried over phosphorous pentoxide in a vacuum desiccator affording the desired nitro-olefin **18**.

### 2.3.1. Preparation and characterisation of **18g**

#### **(E)-3-(2-nitrovinyl)-1H-indole-5-carbonitrile**

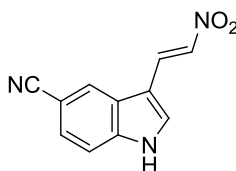

The title compound **18g** was synthesised according to general procedure **B** in 98% yield as a yellow solid.

**m.p.** 142 °C (decomposition); **FT-IR** 2222 (C≡N), 1621 (C=C), 1528 (NO<sub>2(asy)</sub>), 1340 (NO<sub>2(sy)</sub>); **<sup>1</sup>H NMR** (d<sub>6</sub>-DMSO, 400 MHz) δ<sub>H</sub> 12.6 (br s, 1H, ArNH), 8.66 (s, 1H, ArCH), 8.40 (d, 1H, O<sub>2</sub>NCHCH, *J* 13.5 Hz), 8.38 (s, 1H, ArCH), 8.22 (d, 1H, O<sub>2</sub>NCHCH, *J* 13.5 Hz), 7.67 (d, 1H, ArCH, *J* 8.5 Hz), 7.61 (d, 1H, ArCH, *J* 8.5 Hz); **<sup>13</sup>C NMR** (d<sub>6</sub>-DMSO, 100 MHz) δ<sub>C</sub> 140.2 (ArC<sub>quat</sub>), 138.3 (ArCH), 134.0 (O<sub>2</sub>NCH=CH) 134.0 (ArC<sub>quat</sub>), 127.0 (O<sub>2</sub>NCH=CH), 126.9 (ArCH), 125.3 (ArCH), 120.9 (ArCN), 114.8 (ArCH), 109.5 (ArC<sub>quat</sub>), 104.8 (ArC<sub>quat</sub>); ***m/z*** (ES<sup>-</sup>) 212 ([M-H]<sup>-</sup>, 100%), **HRMS** (ES<sup>+</sup>) exact mass calculated for [M+Na]<sup>+</sup> (C<sub>11</sub>H<sub>7</sub>N<sub>3</sub>NaO<sub>2</sub><sup>+</sup>) requires ***m/z*** 236.0430, found ***m/z*** 236.0430.

### 2.3.2. Preparation and characterisation of **18b**

#### **(E)-4-chloro-3-(2-nitrovinyl)-1H-indole**

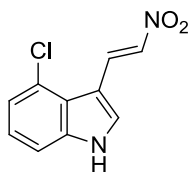

The title compound **18b** was synthesised according to general procedure **B** in 98% yield as a orange solid.

**m.p.** 158-160 °C (decomposition); **FT-IR**  $\nu_{\max}$  3258 (N–H), 1605 (C=C), 1491 (NO<sub>2</sub> (asy)), 1293 (NO<sub>2</sub>(sy)); **<sup>1</sup>H NMR** (d<sub>6</sub>-DMSO, 400 MHz)  $\delta_{\text{H}}$  12.57 (br s, 1H, ArNH), 8.92 (d, 1H, O<sub>2</sub>NCH=CH, *J* 13.5 Hz), 8.53 (s, 1H, ArCH), 8.12 (d, 1H, O<sub>2</sub>NCH=CH, *J* 13.5 Hz), 7.50 (dd, 1H, ArCH, *J* 7.6 Hz, 1.5 Hz), 7.23 (m, 2H, ArCH); **<sup>13</sup>C NMR** (d<sub>6</sub>-DMSO, 100 MHz)  $\delta_{\text{C}}$  139.2 (ArC<sub>quat</sub>), 134.4 (O<sub>2</sub>NCHCH), 133.4 (O<sub>2</sub>NCHCH), 132.6 (ArCH), 125.4 (ArC<sub>quat</sub>), 124.5 (ArCH), 123.6 (ArC<sub>quat</sub>), 123.5 (ArCH), 113.1 (ArCH), 107.8 (ArC<sub>quat</sub>); ***m/z*** (ES<sup>-</sup>) 221 ([M–H]<sup>-</sup>, 100%), **HRMS** (ES<sup>+</sup>) exact mass calculated for [M+Na]<sup>+</sup> (C<sub>10</sub>H<sub>7</sub>ClN<sub>2</sub>NaO<sub>2</sub><sup>+</sup>) requires ***m/z*** 245.0088 & 247.0059 found ***m/z*** 245.0084 & 247.0056.

## 2.4. General procedure C for the synthesis of tryptamines **19**

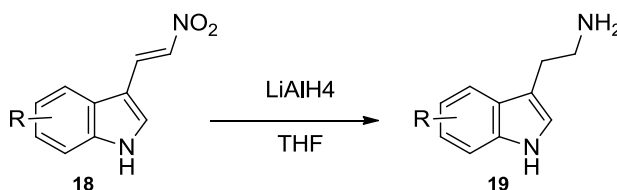

A solution nitro olefin **18** (1 equivalent) in tetrahydrofuran (10 ml per 1 mmol of nitro olefin) was added to a stirred slurry of lithium aluminium hydride powder (6 equivalents) in tetrahydrofuran (equal mass to volume, e.g. 1 g (LiAlH<sub>4</sub>):1ml (tetrahydrofuran)) at 0 °C. The mixture was allowed to warm to room temperature and stirred for 36 hours. The reaction was cooled to 0 °C and was quenched by dropwise addition of water until effervescence ceased. The mixture was then filtered and the solid washed with ethylacetate, the filtrate was concentrated *in vacuo* to furnish the desired tryptamine **19** which was purified by flash column chromatography or acidic extraction from CH<sub>2</sub>Cl<sub>2</sub> solution followed by addition of solid KOH until the PH measures 14 (by universal indicator paper) and extracted with CH<sub>2</sub>Cl<sub>2</sub> dried over NaSO<sub>4</sub> and concentrated.

### 2.4.1.Preparation and characterisation of **19m**

#### 2-(7-bromo-1H-indol-3-yl)ethanamine

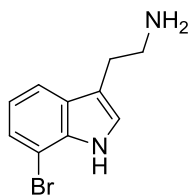

The title compound **19m** was synthesised according to general procedure **C** from known nitro-olefin<sup>7</sup> after acid base extraction isolated as a orange solid (50% yield).

**m.p.** 89-99 °C; **FT-IR**  $\nu_{\max}$  3556 (NH<sub>2</sub>), 3293 (ArN–H); **<sup>1</sup>H NMR** (CDCl<sub>3</sub>, 400 MHz)  $\delta_{\text{H}}$  8.67 (br s, 1H, ArNH), 7.55 (d, 1H, ArCH, *J* 8.0 Hz), 7.35 (d, 1H, ArCH, *J* 8.0 Hz), 7.07 (s, 1H, ArCH), 7.00 (t, 1H, ArCH, *J* 8.0 Hz), 3.04 (t, 2H, NCH<sub>2</sub>, *J* 6.5 Hz), 2.90 (t, 2H, ArCH<sub>2</sub>, *J* 6.5 Hz), 1.58 (br s, 2H, NH<sub>2</sub>); **<sup>13</sup>C NMR** (d<sub>6</sub>-DMSO, 100 MHz)  $\delta_{\text{C}}$  135.1 (ArC<sub>quat</sub>), 128.8 (ArC<sub>quat</sub>), 124.3 (ArCH), 122.7 (ArCH), 120.4 (ArCH), 118.1 (ArCH), 114.9 (ArC<sub>quat</sub>), 104.8 (ArCBr), 42.3 (NCH<sub>2</sub>), 29.5 (ArCH<sub>2</sub>); ***m/z*** (ES+) 239 ([M+H]<sup>+</sup>, 100 %), **HRMS** (ES+) exact mass calculated for [M+H]<sup>+</sup> (C<sub>10</sub>H<sub>12</sub>BrN<sub>2</sub><sup>+</sup>) requires *m/z* 239.0187 & 241.0158 found *m/z* 239.0178 & 241.0157.

#### 2.4.2. Preparation and characterisation of 19b

##### 2-(4-chloro-1H-indol-3-yl)ethanamine

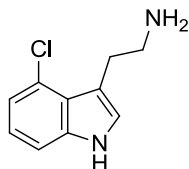

The title compound was synthesised from **19b** according to general procedure **C** and purified by flash column chromatography (DCM ramping to DCM : MeOH : NEt<sub>3</sub>, 85 : 10 : 5) in 57% yield as a orange solid.

**m.p.** 83-93 °C; **FT-IR**  $\nu_{\max}$  3351 (NH<sub>2</sub>), 3294 (ArN–H); **<sup>1</sup>H NMR** (CDCl<sub>3</sub>, 400 MHz)  $\delta_{\text{H}}$  9.02 (br s, 1H, ArNH), 7.22 (dd, 1H, ArCH, *J* 6.5 Hz, 2.5 Hz), 7.08-7.02 (m, 2H, ArCH), 6.99 (s, 1H, ArCH), 3.13 (t, 2H, NCH<sub>2</sub>, *J* 6.5 Hz), 3.06 (t, 2H, ArCH<sub>2</sub>, *J* 6.5 Hz) 1.72 (br s, 2H, NH<sub>2</sub>); **<sup>13</sup>C NMR** (CDCl<sub>3</sub>, 100 MHz)  $\delta_{\text{C}}$  138.1 (ArC<sub>quat</sub>), 126.3 (ArC<sub>quat</sub>), 124.1 (ArC<sub>quat</sub>), 123.9 (ArCH), 122.3 (ArCH), 120.3 (ArCH), 113.7 (ArC<sub>quat</sub>), 110.0 (ArCH), 43.5 (NCH<sub>2</sub>), 30.4 (ArCH<sub>2</sub>); ***m/z*** (ES+) 195 ([M+H]<sup>+</sup>, 100%), **HRMS** (ES+) exact mass calculated for [M+H]<sup>+</sup> (C<sub>10</sub>H<sub>12</sub>ClN<sub>2</sub><sup>+</sup>) requires *m/z* 195.0684 & 197.0654 found *m/z* 195.0681 & 197.0656.

#### 2.4.3. Preparation and characterisation of 20g<sup>8</sup>

##### 3-(2-nitroethyl)-1H-indole-5-carbonitrile

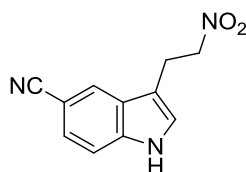

Sodium borohydride (25.8 mmol, 11 eq) was added portionwise to a solution of nitro-olefin **18b** (2.35 mmol, 1 eq) in dimethylformamide (20 ml) and methanol (20 ml). The reaction mixture was stirred at room temperature until the reaction reached completion (complete consumption of starting material by TLC analysis). Hydrochloric acid solution (2M) was added until the pH of the solution reached pH 7. The mixture was extracted with dichloromethane (3 × 30 ml) and the organic layer was washed with brine and dried over sodium sulfate filtered and concentrated *in vacuo*. Purification by column chromatography afforded the title compound XX as a off white solid (70 % yield)

**m.p.** 134-136 °C; **FT-IR**  $\nu_{\max}$  3290 (ArN-H), 2222 (C≡N), 1539 (NO<sub>2</sub> (asy)), 1369 (NO<sub>2</sub>(sy)); **<sup>1</sup>H NMR** (CD<sub>3</sub>OD, 400 MHz)  $\delta_{\text{H}}$  8.05 (s, 1H, ArCH), 7.49 (d, 1H, ArCH, *J* 8.5 Hz), 7.40 (d, 1H, ArCH, *J* 8.5 Hz), 7.30 (s, 1H, ArCH), 4.79-4.71 (m, 2H, NO<sub>2</sub>CH<sub>2</sub>), 3.50-3.45 (m, 2H, ArCH<sub>2</sub>); **<sup>13</sup>C NMR** (CD<sub>3</sub>OD, 100 MHz)  $\delta_{\text{C}}$  138.8 (ArC<sub>quat</sub>), 127.1 (ArC<sub>quat</sub>), 125.9 (ArCH), 124.4 (ArCH), 124.1 (ArCH), 120.8 (ArCN), 112.6 (ArCH), 111.1 (ArC<sub>quat</sub>), 101.7 (ArC<sub>quat</sub>), 75.8 (O<sub>2</sub>NCH<sub>2</sub>), 23.0 (ArCH<sub>2</sub>); ***m/z*** (ES+) 238 ([M+Na]<sup>+</sup>, 100%), **HRMS** (ES+) exact mass calculated for [M+Na]<sup>+</sup> (C<sub>11</sub>H<sub>9</sub>N<sub>3</sub>NaO<sub>2</sub><sup>+</sup>) requires ***m/z*** 238.0587 & 239.0620 found ***m/z*** 238.0589 & 239.0627.

#### 2.4.4. Preparation and characterisation of **19g**

##### 3-(2-aminoethyl)-1H-indole-5-carbonitrile

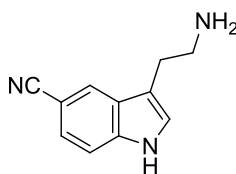

A solution of nitroalkane **20g** (1.53 mmol, 10 eq) in methanol (45 ml) was added to a mixture of zinc (35 mmol, 23 eq) in hydrochloric acid solution (2M, 45 ml) and heated to reflux over 2 hours. The reaction was cooled to room temperature and filtered. Sodium hydroxide (1M) was added the filtrate until the solution reached pH 11. The solution was extracted with a dichloromethane : methanol (95 : 5) solution and dried over NaSO<sub>4</sub>. Concentration afforded the title compound **19g** as a light brown solid (88% yield).

**m.p.** 114-125 °C; **FT-IR**  $\nu_{\max}$  br 3224 (ArN-H, NH<sub>2</sub>), 2216 (C≡N); **<sup>1</sup>H NMR** (CD<sub>3</sub>OD, 400 MHz)  $\delta_{\text{H}}$  8.03 (br s, 1H, ArCH), 7.47 (d, 1H, ArCH, *J* 8.5 Hz), 7.38 (d, 1H, ArCH, *J* 8.5 Hz), 7.28 (br s, 1H, ArCH), 2.95 (br s, 4H, NCH<sub>2</sub>, ArCH<sub>2</sub>); **<sup>13</sup>C NMR** (CD<sub>3</sub>OD, 100

MHz)  $\delta_C$  139.0 (ArC<sub>quat</sub>), 127.9 (ArC<sub>quat</sub>), 125.3 (ArCH), 124.3 (ArCH), 124.1 (ArCH), 121.0 (ArCCN), 113.7 (ArC<sub>quat</sub>), 112.5 (ArCH), 101.2 (ArCCN), 42.0 (NCH<sub>2</sub>), 27.8 (ArCH<sub>2</sub>); *m/z* (ES<sup>-</sup>) 186 ([M+H]<sup>+</sup>, 100%), **HRMS** (ES<sup>+</sup>) exact mass calculated for [M+H]<sup>+</sup> (C<sub>11</sub>H<sub>12</sub>N<sub>3</sub><sup>+</sup>) requires *m/z* 186.1026 & 187.1059 found *m/z* 186.1032 & 187.0944.

---

## 2.5. General procedure D for preparation of 5

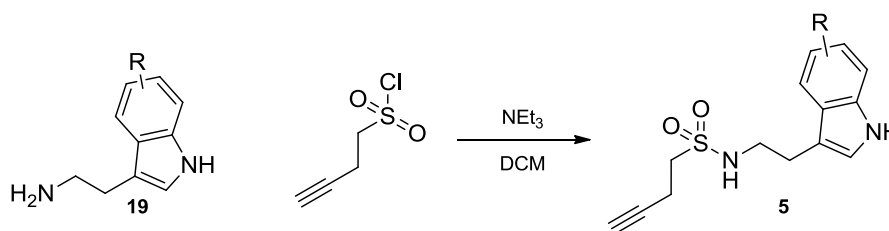

To a stirred solution of sulfonylchloride<sup>9</sup> (1.1 eq) in dichloromethane (5 ml/mmol of tryptamine) under argon at -78 °C was added the desired tryptamine derivative **19** (1 eq) and triethylamine (1.1 eq) in dichloromethane (7 ml/mmol of tryptamine). The mixture was stirred at -78 °C for 5 to 10 mins then concentrated *in vacuo* (in a room temperature water bath) to give the crude product. The residue was purified by flash column chromatography (CH<sub>2</sub>Cl<sub>2</sub>:Et<sub>2</sub>O, 1:0 to 8:2) to give the desired sulfonamide derivative **5**.

---

### 2.5.1. Preparation and characterisation of 5a

#### *N*-[2-(1*H*-indol-3-yl)ethyl]but-3-yne-1-sulfonamide

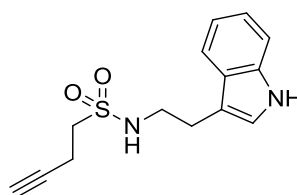

The title compound **5a** was synthesised according to general procedure **D** to give **5a** as an off white solid (90% yield). Recrystallization from ethanol gives thin white crystalline plates.

**m.p.** 122.4-122.5 °C; **FT-IR**  $\nu_{\max}$  3419 (N-H), 3409 (N-H), 1306 (S=O<sub>(as)</sub>), 1126 (S=O<sub>(sy)</sub>); **<sup>1</sup>H NMR** (CDCl<sub>3</sub>, 400 MHz)  $\delta_H$  8.10 (bs, 1H, ArNH), 7.60 (d, 1H, ArCH, *J* 8.0 Hz), 7.39 (d, 1H, ArCH, *J* 8.0 Hz), 7.23 (t, 1H, ArCH, *J* 8.0 Hz), 7.16 (t, 1H, ArCH, *J* 8.0 Hz), 7.1 (d, 1H, ArCH, *J* 2.5 Hz), 4.34 (t, 1H, CH<sub>2</sub>NH, *J* 6.0 Hz), 3.46 (q, 2H, ArCH<sub>2</sub>CH<sub>2</sub>, *J* 6.0 Hz), 3.11 (t, 2H, SCH<sub>2</sub>, *J* 7.0 Hz), 3.07 (t, 2H, ArCH<sub>2</sub>, *J* 6.5 Hz), 2.59 (td, 2H, SCH<sub>2</sub>CH<sub>2</sub>, *J* 7.0 Hz, 3.0 Hz), 1.65 (t, 1H, C≡CH, *J* 3.0 Hz); **<sup>13</sup>C NMR** (CDCl<sub>3</sub>, 100 MHz)  $\delta$ : 136.4 (ArC<sub>quat</sub>), 126.9 (ArC<sub>quat</sub>), 122.8 (ArCH), 122.5 (ArCH), 119.7 (ArCH), 118.6 (ArCH), 111.7 (ArC<sub>quat</sub>), 111.4 (ArCH), 79.8 (HC≡C),

70.5 (C≡CH), 49.9 (SCH<sub>2</sub>), 43.3 (NHCH<sub>2</sub>), 26.2 (ArCH<sub>2</sub>), 14.1 (HCCCH<sub>2</sub>); **m/z** (ES+) 299 ([M+Na]<sup>+</sup>, 100%), **HRMS** (ES+) exact mass calculated for [M+Na]<sup>+</sup> (C<sub>14</sub>H<sub>16</sub>N<sub>2</sub>NaO<sub>2</sub>S<sup>+</sup>) requires *m/z* 299.0825, found *m/z* 299.0822.

---

### 2.5.2. Preparation and characterisation of 5b

#### **N-[2-(4-chloro-1H-indol-3-yl)ethyl]but-3-yne-1-sulfonamide**

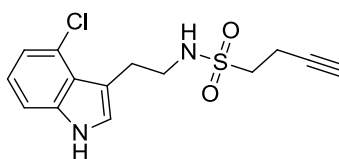

The title compound **5b** was synthesised according to general procedure **D** to give **5b** as an off white solid (80% yield). Recrystallization from ethanol gives thin white crystalline plates.

**m.p.** 84-85 °C; **FT-IR**  $\nu_{\max}$  3381 (N-H), 3280 (N-H), 1312 (S=O<sub>(as)</sub>), 1129 (S=O<sub>(sy)</sub>); **<sup>1</sup>H NMR** (CDCl<sub>3</sub>, 400 MHz)  $\delta_{\text{H}}$  8.21 (br s, 1H, ArNH), 7.29 (dd, 1H, ArCH, *J* 5.5 Hz, 3.0 Hz), 7.03 (d, 1H, ArCH, *J* 2.0 Hz), 7.06-7.12 (m, 2H, ArCH), 4.33 (t, 1H, SNH), 3.51 (q, 2H, NCH<sub>2</sub>, *J* 6.5 Hz), 3.27 (t, 2H, ArCH<sub>2</sub>, *J* 6.5 Hz), 3.14 (t, 2H, SCH<sub>2</sub>, *J* 7.0 Hz), 2.63 (td, 2H, SCH<sub>2</sub>CH<sub>2</sub>, *J* 7.0 Hz, 3.0 Hz), 1.69 (t, 1H, C≡CH, *J* 3.0 Hz); **<sup>13</sup>C NMR** (CDCl<sub>3</sub>, 100 MHz)  $\delta_{\text{C}}$  138.0 (ArC<sub>quat</sub>), 126.0 (ArC<sub>quat</sub>), 124.6 (ArCH), 123.8 (ArC<sub>quat</sub>), 122.9 (ArCH), 120.7 (ArCH), 112.0 (ArC<sub>quat</sub>), 110.2 (ArCH), 79.8 (HC≡C), 70.5 (C≡CH), 49.8 (SCH<sub>2</sub>), 44.6 (NCH<sub>2</sub>), 27.1 (ArCH<sub>2</sub>), 14.1 (SCH<sub>2</sub>CH<sub>2</sub>); **m/z** (ES+) 333 ([M+Na]<sup>+</sup>, 100%), **HRMS** (ES+) exact mass calculated for [M+Na]<sup>+</sup> (C<sub>14</sub>H<sub>15</sub>ClN<sub>2</sub>O<sub>2</sub>SNa<sup>+</sup>) requires *m/z* 333.0435 & 335.0406 found 333.0431 & 335.0401.

---

### 2.5.3. Preparation and characterisation of 5c

#### **N-[2-(5-bromo-1H-indol-3-yl)ethyl]but-3-yne-1-sulfonamide**

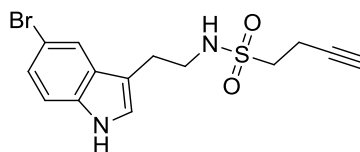

The title compound **5c** was synthesised according to general procedure **D** to give **5c** as a brown solid (25% yield). Recrystallization from ethanol gives an off white solid.



**m.p.** 68-70 °C; **FT-IR**  $\nu_{\max}$  3415-3394 (N-H and ArN-H), 1305 (S=O<sub>(as)</sub>), 1132 (S=O<sub>(sy)</sub>); **<sup>1</sup>H NMR** (CDCl<sub>3</sub>, 500 MHz)  $\delta_{\text{H}}$  8.12 (bs, 1H, ArNH), 7.71 (d, 1H, ArCH, *J* 1.5 Hz), 7.31 (dd, 1H, ArCH, *J* 8.5 Hz, 2.0 Hz), 7.27 (d, 1H, ArCH, *J* 8.5 Hz), 7.13 (d, 1H, ArCH, *J* 2.0 Hz), 4.29 (t, 1H, SNH, *J* 6.0 Hz), 3.45 (q, 2H, NCH<sub>2</sub>, *J* 6.5 Hz), 3.15 (t, 2H, SCH<sub>2</sub>, *J* 7.0 Hz), 3.03 (t, 2H, NCH<sub>2</sub>CH<sub>2</sub>, *J* 6.5 Hz), 2.63 (td, 2H, SCH<sub>2</sub>CH<sub>2</sub>, *J* 7.0 Hz, 2.5 Hz), 1.75 (t, 1H, C≡CH, *J* 3.0 Hz); **<sup>13</sup>C NMR** (CDCl<sub>3</sub>, 125 MHz)  $\delta_{\text{C}}$  135.0 (ArC<sub>Br</sub>), 128.7 (ArC<sub>quat</sub>), 125.4 (ArCH), 123.9 (ArCH), 121.2 (ArCH), 113.0 (ArC<sub>quat</sub>), 112.8 (ArCH), 111.5 (ArC<sub>quat</sub>), 79.8 (HC≡C), 70.5 (HC≡C), 50.0 (SCH<sub>2</sub>), 43.1 (SNCH<sub>2</sub>), 26.1 (NCH<sub>2</sub>CH<sub>2</sub>), 14.1 (SCH<sub>2</sub>CH<sub>2</sub>); ***m/z*** (ES+) 377 ([M+Na]<sup>-</sup>, 100%), **HRMS** (ES+) exact mass calculated for [M+Na]<sup>+</sup> (C<sub>14</sub>H<sub>15</sub>BrN<sub>2</sub>O<sub>2</sub>SNa<sup>+</sup>) requires *m/z* 376.9930 & 378.9909, found *m/z* 376.9925 & 378.9904.

---

#### 2.5.4. Preparation and characterisation of 5d

##### *N*-[2-(6-bromo-1H-indol-3-yl)ethyl]but-3-yne-1-sulfonamide

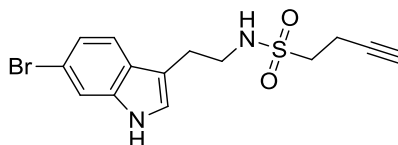

The title compound **5d** was synthesised according to general procedure **D** to give **5d** as an off white solid (73 % yield). Recrystallization from ethanol gives an off white solid.

**m.p.** 110-112 °C; **FT-IR**  $\nu_{\max}$  3416 (N-H), 3290 (ArN-H), 1301 (S=O<sub>(as)</sub>), 1127 (S=O<sub>(sy)</sub>); **<sup>1</sup>H NMR** (CDCl<sub>3</sub>, 400 MHz)  $\delta_{\text{H}}$ : 8.10 (br s, 1H, ArNH), 7.55 (s, 1H, ArCH), 7.45 (d, 1H, ArCH, *J* 8.5 Hz), 7.25 (d, 1H, ArCH, *J* 8.5 Hz), 7.09 (s, 1H, ArCH), 4.31 (t, 1H, SNH, *J* 6.5 Hz), 3.44 (q, 2H, NCH<sub>2</sub>, *J* 6.5 Hz), 3.12 (t, 2H, SCH<sub>2</sub>, *J* 7.0 Hz), 3.04 (t, 2H, ArCH<sub>2</sub>, *J* 6.5 Hz), 2.61 (td, 2H, SCH<sub>2</sub>CH<sub>2</sub>, *J* 7.0 Hz, 2.5 Hz), 1.73 (t, 1H, C≡CH, *J* 2.5 Hz); **<sup>13</sup>C NMR** (CDCl<sub>3</sub>, 100 MHz)  $\delta_{\text{C}}$ : 137.2 (ArC<sub>quat</sub>), 125.9 (ArC<sub>quat</sub>), 123.3 (ArCH), 123.0 (ArCH), 119.8 (ArCH), 116.0 (ArC<sub>Br</sub>), 114.4 (ArCH), 112.0 (ArC<sub>quat</sub>), 79.8 (HC≡C), 70.5 (C≡CH), 50.0 (SCH<sub>2</sub>), 43.3 (NCH<sub>2</sub>), 26.1 (ArCH<sub>2</sub>), 14.1 (HCCCH<sub>2</sub>); ***m/z*** (ES+) 377 ([M+Na]<sup>+</sup>, 100%), **HRMS** (ES+) exact mass calculated for [M+Na]<sup>+</sup> (C<sub>14</sub>H<sub>15</sub>BrN<sub>2</sub>O<sub>2</sub>SNa<sup>+</sup>) requires *m/z* 376.9930 & 378.9909, found *m/z* 376.9926 & 378.9905.

---

#### 2.5.5. Preparation and characterisation of 5e

##### *N*-[2-(5-fluoro-1H-indol-3-yl)ethyl]but-3-yne-1-sulfonamide

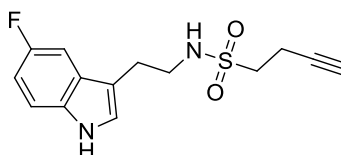

The title compound **5e** was synthesised according to general procedure **D** to give **5e** as an off white solid (57% yield). Recrystallization from ethanol gives thin white crystalline plates.

**m.p.** 99-101 °C; **FT-IR**  $\nu_{\max}$  3419 (N–H), 3294 (ArN–H), 1300 (S=O<sub>(as)</sub>), 1126 (S=O<sub>(sy)</sub>); **<sup>1</sup>H NMR** (CDCl<sub>3</sub>, 400 MHz)  $\delta_{\text{H}}$ : 8.17 (br s, 1H, ArNH), 7.30 (dd, 1H, ArCH, *J* 9.0 Hz, 4.0 Hz), 7.22 (dd, 1H, ArCH, *J* 9.5 Hz, 2.0 Hz), 7.14 (d, 1H, ArCH, *J* 2.0 Hz), 6.97 (td, 1H, ArCH, *J* 9.0 Hz, 2.5 Hz), 4.40 (t, 1H, SNH, *J* 6.0 Hz), 3.43 (q, 2H, NHCH<sub>2</sub>, *J* 6.5 Hz), 3.12 (t, 2H, SCH<sub>2</sub>, *J* 7.0 Hz), 3.01 (t, 2H, ArCH<sub>2</sub>, *J* 6.5 Hz), 2.61 (td, 2H, SCH<sub>2</sub>CH<sub>2</sub>, *J* 7.0 Hz, 3.0 Hz), 1.73 (t, 1H, C≡CH, 2.5 Hz) **<sup>13</sup>C NMR** (CDCl<sub>3</sub>, 100 MHz)  $\delta_{\text{C}}$ : 157.8 (d, ArCF, *J* 236 Hz), 132.9 (ArC<sub>quat</sub>), 127.3 (d, ArC<sub>quat</sub>, *J* 10 Hz), 124.6 (ArCH), 112.1 (d, ArCH, *J* 10 Hz), 111.8 (d, ArC<sub>quat</sub>, *J* 4.8 Hz), 110.8 (d, ArCH, *J* 26 Hz), 103.5 (d, ArCH, *J* 24 Hz), 79.8 (HC≡C), 70.5 (C≡CH), 49.9 (SCH<sub>2</sub>), 43.1 (SNCH<sub>2</sub>), 26.2 (ArCH<sub>2</sub>), 14.1 (SCH<sub>2</sub>CH<sub>2</sub>); **<sup>19</sup>F NMR** (CDCl<sub>3</sub>, 376 MHz), -124.0 (ArF); ***m/z*** (ES+) 317 ([M+Na]<sup>+</sup>, 100%), **HRMS** (ES+) exact mass calculated for [M+Na]<sup>+</sup> (C<sub>14</sub>H<sub>15</sub>FN<sub>2</sub>O<sub>2</sub>SNa<sup>+</sup>) requires *m/z* 317.0730 & 318.0763, found *m/z* 317.0724 & 318.0764.

---

## 2.5.6. Preparation and characterisation of **5f**

### *N*-[2-(6-fluoro-1*H*-indol-3-yl)ethyl]but-3-yne-1-sulfonamide

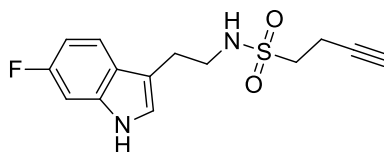

The title compound **5f** was synthesised according to general procedure **D** to give **5f** as an off white solid (46% yield). Recrystallization from ethanol gives thin white crystalline plates.

**m.p.** 98-99 °C; **FT-IR**  $\nu_{\max}$  3419 (N–H), 3307 (ArN–H), 1301 (S=O<sub>(as)</sub>), 1127 (S=O<sub>(sy)</sub>); **<sup>1</sup>H NMR** (CDCl<sub>3</sub>, 400 MHz)  $\delta_{\text{H}}$ : 8.15 (br s, 1H, ArNH), 7.49 (dd, 1H, ArCH, *J* 9.0 Hz, 5.0 Hz), 7.07 (m, 2H, ArCH), 6.92 (td, 1H, ArCH, *J* 9.0 Hz, 2.0 Hz), 4.39 (t, 1H, SNH, *J* 6.0 Hz), 3.44 (q, 2H, NCH<sub>2</sub>, *J* 6.5 Hz), 3.11 (t, 2H, SCH<sub>2</sub>, *J* 7.0 Hz), 3.03 (t, 2H, ArCH<sub>2</sub>, 6.5 Hz), 2.60 (td, 2H, SCH<sub>2</sub>CH<sub>2</sub>, *J* 7.0 Hz, 2.5 Hz), 1.74 (t, 1H, C≡CH, *J* 3.0 Hz) **<sup>13</sup>C NMR** (CDCl<sub>3</sub>, 100 MHz)  $\delta_{\text{C}}$ : 160.1 (d, ArCF, *J* 239 Hz), 136.3 (d, ArC<sub>quat</sub>, *J* 12 Hz), 123.6 (ArC<sub>quat</sub>), 123.0 (d, ArCH, *J* 3 Hz), 119.3 (d, ArCH, *J* 10 Hz) 111.8 (ArC<sub>quat</sub>), 108.5 (d, ArCH, *J* 24 Hz), 97.7 (d, ArCH, *J* 26 Hz) 79.8 (HC≡C), 70.5 (C≡CH), 49.9 (SCH<sub>2</sub>), 43.3 (NCH<sub>2</sub>), 26.2 (ArCH<sub>2</sub>), 14.1 (SCH<sub>2</sub>CH<sub>2</sub>); **<sup>19</sup>F NMR** (CDCl<sub>3</sub>, 376 MHz), -120.4 (ArF); ***m/z*** (ES+) 317 ([M+Na]<sup>+</sup>, 100%), **HRMS** (ES+) exact mass calculated for [M+Na]<sup>+</sup> (C<sub>14</sub>H<sub>15</sub>FN<sub>2</sub>O<sub>2</sub>SNa<sup>+</sup>) requires *m/z* 317.0730 & 318.0763, found *m/z* 317.0727 & 318.0766.

---

## 2.5.7. Preparation and characterisation of **5g**

### *N*-[2-(5-cyano-1*H*-indol-3-yl)ethyl]but-3-yne-1-sulfonamide

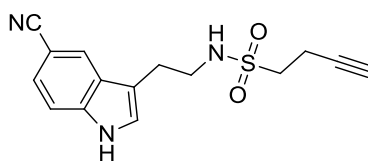

The title compound **5g** was synthesised according to general procedure **D** to give **5g** as an off white solid (42% yield). Recrystallization from ethanol gives thin white crystalline plates.

**m.p.** 135-136 °C; **FT-IR**  $\nu_{\max}$  3339 (N–H), 3294 (ArN–H), 2225 (C≡N), 1318 (S=O<sub>(as)</sub>), 1136 (S=O<sub>(sy)</sub>); **<sup>1</sup>H NMR** (d<sub>6</sub>-DMSO, 400 MHz)  $\delta_{\text{H}}$  11.46 (br s, 1H, ArNH), 8.09 (s, 1H, ArCH), 7.51 (d, 1H, ArCH, *J* 8.0 Hz), 7.44-7.39 (m, 2H, ArCH), 7.26 (t, 1H, SNH, *J* 6.0 Hz), 3.23 (td, 2H, NCH<sub>2</sub>, *J* 7.0 Hz, 6.0 Hz), 3.15 (t, 2H, SCH<sub>2</sub>, *J* 7.5 Hz), 2.93 (t, 1H, C≡CH, *J* 3.0 Hz), 2.90 (t, 2H, ArCH<sub>2</sub>, *J* 7.0 Hz), 2.50<sup>(signal hidden under DMSO peak, confirmed by HSQC and COSY)</sup> (m, 2H, HC≡CCH<sub>2</sub>, *J* 7.5 Hz, 3.0 Hz); **<sup>13</sup>C NMR** (d<sub>6</sub>-DMSO, 100 MHz)  $\delta_{\text{C}}$  138.7 (ArC<sub>quat</sub>), 127.9 (ArC<sub>quat</sub>), 126.7 (ArCH), 125.1 (ArCH), 124.5 (ArCH), 121.8 (ArCN), 113.5 (ArCH), 113.5 (ArC<sub>quat</sub>), 101.2 (ArC<sub>quat</sub>), 82.0 (HC≡C), 73.4 (C≡CH), 50.2 (SCH<sub>2</sub>), 43.9 (NCH<sub>2</sub>), 26.4 (ArCH<sub>2</sub>), 14.2 (SCH<sub>2</sub>CH<sub>2</sub>); **m/z** (ES+) 324 ([M+Na]<sup>+</sup>, 100%), **HRMS** (ES+) exact mass calculated for [M+Na]<sup>+</sup> (C<sub>15</sub>H<sub>15</sub>N<sub>3</sub>O<sub>2</sub>SNa<sup>+</sup>) requires *m/z* 324.0777 & 325.0810, found *m/z* 324.0770 & 325.0812.

## 2.5.8. Preparation and characterisation of 5h

### *N*-[2-(5-methoxy-1*H*-indol-3-yl)ethyl]but-3-yn-1-sulfonamide

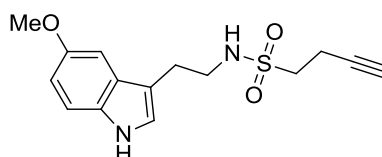

The title compound **5h** was synthesised according to general procedure **D** to give **5h** as an off white solid (81% yield). Recrystallization from ethanol gives an off white solid.

**m.p.** 70-72 °C; **FT-IR**  $\nu_{\max}$  3405 (SN–H), 3282 (ArN–H), 1317 (S=O<sub>(as)</sub>), 1134 (S=O<sub>(sy)</sub>); **<sup>1</sup>H NMR** (CDCl<sub>3</sub>, 400 MHz)  $\delta_{\text{H}}$  8.04 (br s, 1H, ArNH), 7.27 (d, 1H, ArCH, *J* 8.5 Hz), 7.05 (d, 1H, ArCH, *J* 1.5 Hz), 7.03 (d, 1H, ArCH, *J* 2.5 Hz), 6.89 (dd, 1H, ArCH, *J* 8.5 Hz, 2.5 Hz), 4.42 (t, 1H, SNH, *J* 6.5 Hz), 3.88 (s, 3H, OCH<sub>3</sub>), 3.44 (q, 2H, NCH<sub>2</sub>, *J* 6.5 Hz), 3.11 (t, 2H, SCH<sub>2</sub>, *J* 7.0 Hz), 3.02 (t, 2H, ArCH<sub>2</sub>, *J* 6.5 Hz), 2.59 (td, 2H, SCH<sub>2</sub>CH<sub>2</sub>, *J* 7.0 Hz), 1.72 (t, 1H, C≡CH, *J* 2.8 Hz); **<sup>13</sup>C NMR** (CDCl<sub>3</sub>, 125 MHz)  $\delta_{\text{C}}$  154.2 (ArCOMe), 131.5 (ArC<sub>quat</sub>), 127.4 (ArC<sub>quat</sub>), 123.5 (ArCH), 112.6 (ArCH), 112.2 (ArCH), 111.4 (ArC<sub>quat</sub>), 100.5 (ArCH), 79.8 (HC≡C), 70.5 (C≡CH), 56.0 (OCH<sub>3</sub>), 49.9 (SCH<sub>2</sub>), 43.3 (NCH<sub>2</sub>), 26.2 (ArCH<sub>2</sub>), 14.1 (SCH<sub>2</sub>CH<sub>2</sub>); **m/z** (ES+) 329 ([M+Na]<sup>+</sup>, 100%), **HRMS** (ES+) exact mass calculated for [M+Na]<sup>+</sup> (C<sub>15</sub>H<sub>18</sub>N<sub>2</sub>O<sub>3</sub>SNa<sup>+</sup>) requires *m/z* 329.0930 & 330.0963, found *m/z* 329.0921 & 330.0969.

## 2.5.9. Preparation and characterisation of 5i

### *N*-[2-(5-methyl-1H-indol-3-yl)ethyl]but-3-yne-1-sulfonamide

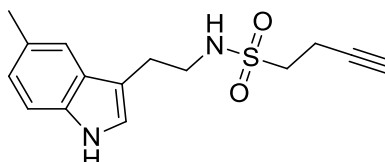

The title compound **5i** was synthesised according to general procedure **D** to give **5i** as an off white solid (72% yield). Recrystallization from ethanol gives an off white solid.

**m.p.** 112-114 °C; **FT-IR**  $\nu_{\max}$  3412 (N-H), 3300 (ArN-H), 1307 (S=O<sub>(as)</sub>), 1127 (S=O<sub>(sy)</sub>); **<sup>1</sup>H NMR** (CDCl<sub>3</sub>, 400 MHz)  $\delta_{\text{H}}$  7.99 (br s, 1H, ArNH), 7.37 (s, 1H, ArCH), 7.28 (d, 1H, ArCH, *J* 7.0 Hz), 7.06 (d, 1H, ArCH, *J* 1.5 Hz), 7.05 (dd, 1H, ArCH, *J* 7.0 Hz, 1.5 Hz), 4.32 (t, 1H, SNH, *J* 6.5 Hz), 3.45 (q, 2H, NCH<sub>2</sub>, *J* 6.5 Hz), 3.11 (t, 2H, SCH<sub>2</sub>, *J* 7.5 Hz), 3.04 (t, 2H, ArCH<sub>2</sub>, *J* 6.5 Hz), 2.59 (td, 2H, SCH<sub>2</sub>CH<sub>2</sub>, *J* 7.0 Hz, 2.5 Hz), 2.47 (s, 3H, ArCH<sub>3</sub>), 1.64 (t, 1H, C≡CH, *J* 2.5 Hz); **<sup>13</sup>C NMR** (CDCl<sub>3</sub>, 125 MHz)  $\delta_{\text{C}}$  134.8 (ArC<sub>quat</sub>), 129.0 (ArC<sub>Me</sub>), 127.2 (ArC<sub>quat</sub>), 124.0 (ArCH), 122.9 (ArCH), 118.2 (ArCH), 111.1 (ArCH), 111.0 (ArC<sub>quat</sub>), 79.8 (HC≡C), 70.5 (C≡CH), 49.9 (SCH<sub>2</sub>), 43.3 (NCH<sub>2</sub>), 26.2 (ArCH<sub>2</sub>), 21.5 (ArCH<sub>3</sub>), 14.1 (HCCC<sub>2</sub>); **m/z** (ES+) 313 ([M+Na]<sup>+</sup>, 100%), **HRMS** (ES+) exact mass calculated for [M+Na]<sup>+</sup> (C<sub>15</sub>H<sub>18</sub>N<sub>2</sub>NaO<sub>2</sub>S<sup>+</sup>) requires *m/z* 313.0981 & 314.1014 found 313.0973 & 314.1009.

## 2.5.10. Preparation and characterisation of 5j

### *N*-[2-(7-methyl-1H-indol-3-yl)ethyl]but-3-yne-1-sulfonamide

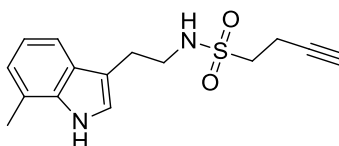

The title compound **5j** was synthesised according to general procedure **D** to give **5j** as an off white solid (95% yield). Recrystallization from ethanol gives an off white solid.

**m.p.** 113-117 °C; **FT-IR**  $\nu_{\max}$  3400 (N-H), 3291 (ArN-H), 1303 (S=O<sub>(as)</sub>), 1127 (S=O<sub>(sy)</sub>); **<sup>1</sup>H NMR** (CDCl<sub>3</sub>, 400 MHz)  $\delta_{\text{H}}$  8.05 (br s, 1H, ArNH), 7.45 (d, 1H, ArCH, *J* 7.5 Hz), 7.10 (d, 1H, ArCH, *J* 2.0 Hz), 7.08 (t, 1H, ArCH, 7.5 Hz), 7.03 (d, 1H, ArCH, *J* 7.5 Hz), 4.36 (t, 1H, SNH, *J* 6.0 Hz), 3.46 (q, 2H, NCH<sub>2</sub>, *J* 6.0 Hz), 3.09 (t, 2H, SCH<sub>2</sub>, *J* 7.0 Hz), 3.06 (t, 2H, ArCH<sub>2</sub>, *J* 6.0 Hz), 2.57 (td, 2H,

SCH<sub>2</sub>CH<sub>2</sub>, *J* 7.0 Hz, 3.0 Hz), 2.50 (s, 3H, ArCH<sub>3</sub>), 1.68 (t, 1H, C≡CH, *J* 3.0 Hz); <sup>13</sup>C NMR (CDCl<sub>3</sub>, 100 MHz) δ<sub>C</sub> 136.1 (ArC<sub>quat</sub>), 126.5 (ArC<sub>quat</sub>), 122.9 (ArCH), 122.5 (ArCH), 120.6 (ArCCH<sub>3</sub>), 119.9 (ArCH), 116.3 (ArCH), 112.1 (ArC<sub>quat</sub>), 79.8 (HC≡C), 70.5 (C≡CH), 49.9 (SCH<sub>2</sub>), 43.3 (NCH<sub>2</sub>), 26.3 (ArCH<sub>2</sub>), 16.6 (ArCH<sub>3</sub>), 14.1 (SCH<sub>2</sub>CH<sub>2</sub>); *m/z* (ES+) 313 ([M+Na]<sup>+</sup>, 100%), HRMS (ES+) exact mass calculated for [M+Na]<sup>+</sup> (C<sub>15</sub>H<sub>18</sub>N<sub>2</sub>O<sub>2</sub>SNa<sup>+</sup>) requires *m/z* 313.0981 & 314.1014, found *m/z* 313.0977 & 314.1018.

---

### 2.5.11. Preparation and characterisation of 5k

#### *N*-[2-(7-ethyl-1H-indol-3-yl)ethyl]but-3-yne-1-sulfonamide

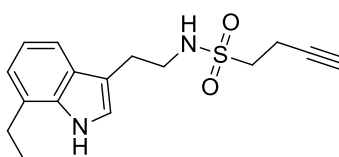

The title compound **5k** was synthesised according to general procedure **D** to give **5k** as an off white solid (25% yield). Recrystallization from ethanol gives thin white crystalline plates.

**m.p.** 109-112 °C; FT-IR ν<sub>max</sub> 3404 (N-H), 3297 (ArN-H), 1312 (S=O<sub>(as)</sub>), 1129 (S=O<sub>(sy)</sub>); <sup>1</sup>H NMR (CDCl<sub>3</sub>, 500 MHz) δ<sub>H</sub> 8.04 (br s, 1H, ArNH), 7.45 (d, 1H, ArCH, *J* 7.5 Hz), 7.11 (d, 1H, ArCH, *J* 3.0 Hz), 7.11 (t, 1H, ArCH, *J* 7.5 Hz), 7.07 (d, 1H, ArCH, *J* 7.5 Hz), 4.31 (t, 1H, SNH, *J* 6.5 Hz), 3.46 (q, 2H, NCH<sub>2</sub>, *J* 6.5 Hz), 3.11 (t, 2H, SCH<sub>2</sub>, *J* 7.5 Hz), 3.07 (t, 2H, NCH<sub>2</sub>CH<sub>2</sub>, *J* 6.5 Hz), 2.87 (q, 2H, ArCH<sub>2</sub>CH<sub>3</sub>, *J* 7.5 Hz), 2.59 (td, 2H, SCH<sub>2</sub>CH<sub>2</sub>, *J* 7.5 Hz, 3.0 Hz), 1.65 (t, 1H, C≡CH, *J* 3.0 Hz), 1.37 (t, 3H, ArCH<sub>2</sub>CH<sub>3</sub>, *J* 7.5 Hz); <sup>13</sup>C NMR (CDCl<sub>3</sub>, 125 MHz) δ<sub>C</sub> 135.3 (ArC<sub>quat</sub>), 126.8 (ArC<sub>quat</sub>), 126.7 (ArC<sub>quat</sub>), 122.4 (ArCH), 121.0 (ArCH), 120.1 (ArCH), 116.3 (ArCH), 112.1 (ArC<sub>quat</sub>), 79.7 (HC≡C), 70.4 (C≡CH), 49.9 (SCH<sub>2</sub>), 43.3 (NCH<sub>2</sub>), 26.3 (NCH<sub>2</sub>CH<sub>2</sub>), 24.0 (ArCH<sub>2</sub>CH<sub>3</sub>), 14.1 (SCH<sub>2</sub>CH<sub>2</sub>), 13.8 (ArCH<sub>2</sub>CH<sub>3</sub>); *m/z* (ES-) 303 ([M-H]<sup>-</sup>, 100%), HRMS (ES+) exact mass calculated for [M+Na]<sup>+</sup> (C<sub>16</sub>H<sub>20</sub>N<sub>2</sub>O<sub>2</sub>SNa<sup>+</sup>) requires *m/z* 327.1138 & 328.1171, found *m/z* 327.1134 & 328.1170.

---

### 2.6. General procedure E for preparation of 6

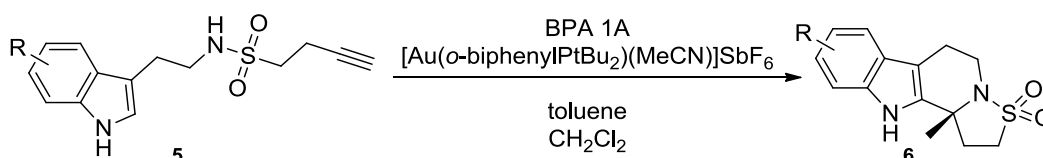

To a solution of the desired sulfonamide **5** (1 eq) and **BPA-1A** (0.1 eq) in toluene (14 ml per 0.1 mmol of sulfonamide) at 60 °C in a foil covered flask was added [Au(o-biphenylPtBu<sub>2</sub>)(MeCN)]SbF<sub>6</sub> (**8**) (0.005 eq) in dichloromethane (0.67 ml per 1 mmol of sulfonamide). The reaction was allowed to stir at 60 °C for 1 to 12 hours. Upon completion the mixture was concentrated *in vacuo* and purified by flash column chromatography (CH<sub>2</sub>Cl<sub>2</sub>:MTBE (CH<sub>3</sub>OC(CH<sub>3</sub>)<sub>3</sub>) 1:0 to 9:1).

---

## 2.7. General procedure F for preparation of racemic derivatives 6

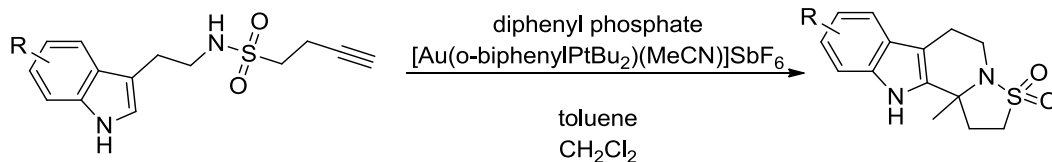

To a solution of the desired sulfonamide **5** (1 eq) and diphenylphosphate (0.1 eq) in toluene (14 ml per 0.1 mmol of sulfonamide **5**) at 60 °C in a foil covered flask was added  $[\text{Au}(\text{o-biphenylPtBu}_2)(\text{MeCN})]\text{SbF}_6$  (**8**) (0.05 eq) in dichloromethane (0.67 ml per 1 mmol of sulfonamide). The reaction was allowed to stir at 60 °C for 1 to 12 hours. Upon completion the mixture is concentrated *in vacuo* and purified by flash column chromatography ( $\text{CH}_2\text{Cl}_2$ :MTBE ( $\text{CH}_3\text{OC}(\text{CH}_3)_3$ ), 1:0 to 9 : 1).

### 2.7.1. Preparation and characterisation of 6a

#### (R)-11b-methyl-1,2,5,6,11,11b-hexahydroisothiazolo[2',3':1,2]pyrido[3,4-b]indole 3,3-dioxide

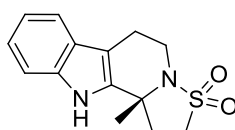

The title compound **6a** was synthesised according to general procedure **E** providing **6a** as a white solid (84% yield, 88% e.e.). Chiralcel AD, 80:20 Hexane/IPA, 1ml/min, 220 nm, major  $t_R = 6.0$  min, minor  $t_R = 15.4$  min;  $[\alpha]_D^{21} = +113.8$  (c 0.16, 1:1 MeOH: $\text{CH}_2\text{Cl}_2$ ).

**Racemic-6a** was synthesised according to general procedure **F** as an off white solid.

**m.p.** 279-283 °C; **FT-IR**  $\nu_{\text{max}}$  3397 (N-H), 1289 ( $\text{S}=\text{O}_{(\text{as})}$ ), 1145 ( $\text{S}=\text{O}_{(\text{sy})}$ );  **$^1\text{H NMR}$**  ( $\text{CDCl}_3$ , 500 MHz)  $\delta_{\text{H}}$  7.78 (br s, 1H, ArNH), 7.50 (d, 1H, ArCH,  $J$  8.0 Hz), 7.35 (d, 1H, ArCH,  $J$  8.0 Hz), 7.22 (ddd, 1H, ArCH,  $J$  8.0 Hz, 7.0 Hz, 1.0 Hz), 7.15 (ddd, 1H, ArCH,  $J$  8.0 Hz, 7.0 Hz, 1.0 Hz), 4.05 (dd, 1H,  $\text{SNCH}_a\text{H}_b$ ,  $J$  14.5 Hz, 5.0 Hz), 3.33 (ddd, 1H,  $\text{SNCH}_a\text{H}_b$ , 15.0 Hz, 12.0 Hz, 4.5 Hz), 3.19 (m, 2H,  $\text{ArCH}_a\text{H}_b$ ,  $\text{SCH}_a\text{H}_b$ ), 2.90 (ddd, 1H,  $\text{SCH}_a\text{H}_b$ ,  $J$  12.0 Hz, 11.0 Hz, 7.0 Hz), 2.65 (m, 3H,  $\text{ArCH}_a\text{H}_b$ ,  $\text{SCH}_2\text{CH}_a\text{H}_b$ ), 1.73 (s, 3H,  $\text{CCH}_3$ );  **$^{13}\text{C NMR}$**  ( $\text{CDCl}_3$ , 125 MHz)  $\delta_{\text{C}}$  135.9 ( $\text{ArC}_{\text{quat}}$ ), 133.9 ( $\text{ArC}_{\text{quat}}$ ), 126.8 ( $\text{ArC}_{\text{quat}}$ ), 122.8 (ArCH), 120.1 (ArCH), 118.7 (ArCH), 111.9 (ArCH), 109.7 ( $\text{ArC}_{\text{quat}}$ ), 59.1 ( $\text{NCCH}_2$ ), 46.0 ( $\text{NSCH}_2$ ), 38.1 ( $\text{SNCH}_2$ ), 33.6 ( $\text{NSCH}_2\text{CH}_2$ ), 28.2 ( $\text{CCH}_3$ ), 19.9 (ArCH<sub>2</sub>); (ES+) 299 ( $[\text{M}+\text{Na}]^+$ , 100%), **HRMS** (ES+) exact mass calculated for  $[\text{M}+\text{Na}]^+$  ( $\text{C}_{14}\text{H}_{16}\text{N}_2\text{O}_2\text{SNa}^+$ ) requires  $m/z$  299.0825 & 300.0858, found  $m/z$  299.0821 & 300.0861.

### 2.7.2. Preparation and characterisation of 7<sup>a</sup>

## 2,3,6,7,12,12b-hexahydro-1H-[1,2]thiazino[2',3':1,2]pyrido[3,4-b]indole 4,4-dioxide

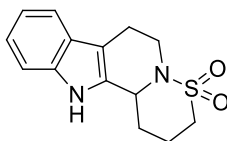

The title compound **7a** was isolated along side **6a** according to general procedure **E** providing a white solid (8% yield).

**m.p.** 261-265 °C (decomposition); **FT-IR**  $\nu_{\max}$  3412 (N–H), 1323 (S=O<sub>(as)</sub>), 1149 (S=O<sub>(sy)</sub>); **<sup>1</sup>H NMR** (CDCl<sub>3</sub>, 500 MHz)  $\delta_{\text{H}}$  7.73 (br s, 1H, ArNH), 7.51 (d, 1H, ArCH, *J* 8.0 Hz), 7.34 (d, 1H, ArCH, *J* 8.0 Hz), 7.21 (t, 1H, ArCH, *J* 8.0 Hz), 7.14 (t, 1H, ArCH, *J* 8.0 Hz), 4.97 (d, 1H, NCH<sub>2</sub>CH<sub>2</sub>, *J* 11.0 Hz), 3.68 (m, 1H, SNCH<sub>2</sub>H<sub>b</sub>), 3.60 (m, 1H, SNCH<sub>2</sub>H<sub>b</sub>), 3.21 (dt, 1H, NSCH<sub>2</sub>CH<sub>a</sub>H<sub>b</sub>, *J* 13.5 Hz, 3.5 Hz), 3.02 (td, 1H, NSCH<sub>2</sub>CH<sub>a</sub>H<sub>b</sub>, *J* 13.5 Hz, 4.0 Hz), 2.95 (m, 1H, ArCH<sub>2</sub>H<sub>b</sub>), 2.89 (dt, 1H, ArCH<sub>2</sub>H<sub>b</sub>, *J* 15.5 Hz, 4.5 Hz), 2.44 (qt, 1H, NSCH<sub>2</sub>CH<sub>2</sub>H<sub>b</sub>, *J* 14.0 Hz, 3.5 Hz), 2.24 (dt, 1H, NSCH<sub>2</sub>CH<sub>2</sub>H<sub>b</sub>, *J* 14.0 Hz, 3.5 Hz), 2.05 (dq, 1H, NSCH<sub>2</sub>CH<sub>2</sub>CH<sub>a</sub>H<sub>b</sub>, *J* 14.5 Hz, 3.0 Hz), 1.84 (m, 1H, NSCH<sub>2</sub>CH<sub>2</sub>CH<sub>a</sub>H<sub>b</sub>); **<sup>13</sup>C NMR** (CDCl<sub>3</sub>, 125 MHz)  $\delta_{\text{C}}$  136.2 (ArC<sub>quat</sub>), 132.0 (ArC<sub>quat</sub>), 126.5 (ArC<sub>quat</sub>), 122.4 (ArCH), 120.0 (ArCH), 118.4 (ArCH), 110.9 (ArCH), 108.7 (ArC<sub>quat</sub>), 55.5 (NCCH<sub>2</sub>), 46.8 (NSCH<sub>2</sub>), 39.8 (SNCH<sub>2</sub>), 27.8 (NSCH<sub>2</sub>CH<sub>2</sub>), 22.8 (NSCH<sub>2</sub>CH<sub>2</sub>), 21.4 (ArCH<sub>2</sub>); ***m/z*** (ES+) 299 ([M+Na]<sup>+</sup>, 100%), **HRMS** (ES+) exact mass calculated for [M+Na]<sup>+</sup> (C<sub>14</sub>H<sub>16</sub>N<sub>2</sub>O<sub>2</sub>SNa<sup>+</sup>) requires *m/z* 299.0825 & 300.0858, found *m/z* 299.0819 & 300.0863.

### 2.7.3. Preparation and characterisation of **6b**

#### (*R*)-7-chloro-11b-methyl-1,2,5,6,11,11b-hexahydro[1,2]thiazolo[2',3':1,2]pyrido[3,4-*b*]indole 3,3-dioxide

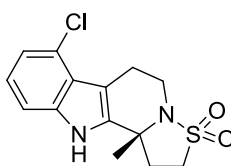

The title compound **6b** was synthesised according to general procedure **E** providing a white solid (77% yield, 95% e.e.). Chiralcel AD, 80:20 Hexane/IPA, 1ml/min, 220 nm, major *t<sub>R</sub>* = 5.8 min, minor *t<sub>R</sub>* = 8.1 min); [ $\alpha$ ]<sub>D</sub><sup>25</sup> = +94.3 (c 0.21, 1:1 MeOH:CH<sub>2</sub>Cl<sub>2</sub>).

**Racemic-6b** was synthesised according to general procedure **F** as an off white solid,

**m.p.** 208 °C (decomposition); **FT-IR**  $\nu_{\max}$  3321 (N–H), 1303 (S=O<sub>(as)</sub>), 1136 (S=O<sub>(sy)</sub>); **<sup>1</sup>H NMR** (CD<sub>3</sub>OD, 500 MHz)  $\delta_{\text{H}}$  7.25 (dd, 1H, ArCH, *J* 8.0 Hz, 1.0 Hz), 7.03 (t, 1H, ArCH, *J* 8.0 Hz), 6.96 (d, 1H, ArCH, *J* 7.5 Hz), 3.92 (dd, 1H, NCH<sub>2</sub>H<sub>b</sub>, *J* 15.0 Hz, 5.5 Hz), 3.37 (ddd, 1H, NCH<sub>2</sub>H<sub>b</sub>, *J* 15.0 Hz, 12.0 Hz, 4.5 Hz), 3.32-3.23 (m, 2H, NCH<sub>2</sub>CH<sub>2</sub>H<sub>b</sub>, SCH<sub>2</sub>H<sub>b</sub>), 3.09 (ddd, 1H, NCH<sub>2</sub>CH<sub>2</sub>H<sub>b</sub>, *J* 15.5

Hz, 4.0 Hz, 1.0 Hz), 2.92 (ddd, 1H, SCH<sub>a</sub>H<sub>b</sub>, *J* 12.5 Hz, 10.0 Hz, 7.0 Hz), 2.77 (ddd, 1H, SCH<sub>2</sub>CH<sub>a</sub>H<sub>b</sub>, *J* 13.5 Hz, 7.0 Hz, 5.5 Hz), 2.60 (ddd, 1H, SCH<sub>2</sub>CH<sub>a</sub>H<sub>b</sub>, 13.5 Hz, 10.0 Hz, 6.5 Hz), 1.72 (s, 3H, NCCH<sub>3</sub>); <sup>13</sup>C NMR (CD<sub>3</sub>OD, 125 MHz) δ<sub>c</sub> 139.1 (ArC<sub>quat</sub>), 137.4 (ArC<sub>Cl</sub>), 126.9 (ArC<sub>quat</sub>), 125.2 (ArC<sub>quat</sub>), 123.4 (ArCH), 120.6 (ArCH), 111.0 (ArCH), 108.8 (ArC<sub>quat</sub>), 60.6 (NCCH<sub>3</sub>), 47.0 (SCH<sub>2</sub>), 38.7 (NCH<sub>2</sub>), 34.3 (SCH<sub>2</sub>CH<sub>2</sub>), 28.0 (NCH<sub>2</sub>CH<sub>2</sub>), 23.0 (NCCH<sub>3</sub>); *m/z* (ES<sup>+</sup>) 333 ([M+Na]<sup>+</sup>, 100%), HRMS (ES<sup>+</sup>) exact mass calculated for [M+Na]<sup>+</sup> (C<sub>14</sub>H<sub>15</sub>ClN<sub>2</sub>O<sub>2</sub>SN<sup>+</sup>) requires *m/z* 333.0435 & 335.0406, found *m/z* 333.0435 & 335.0405.

---

#### 2.7.4. Preparation and characterisation of 6c

##### (R)-8-bromo-11b-methyl-1,2,5,6,11,11b-hexahydroisothiazolo[2',3':1,2]pyrido[3,4-b]indole 3,3-dioxide

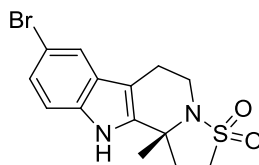

The title compound **6c** was synthesised according to general procedure **E** as a white solid (82% yield, 90% e.e.). Chiralcel AD, 80:20 Hexane/IPA, 1ml/min, 220 nm, major *t<sub>R</sub>* = 10.0 min, minor *t<sub>R</sub>* = 27.2 min); [α]<sub>D</sub><sup>21</sup> = +101.6 (c 0.25, 1:1 MeOH:CH<sub>2</sub>Cl<sub>2</sub>).

**Racemic-6c** was synthesised according to general procedure **F** as an off white solid.

**m.p.** 266 °C (decomposition); **FT-IR** *v*<sub>max</sub> 3410 (N-H), 1301 (S=O<sub>(as)</sub>), 1143 (S=O<sub>(sy)</sub>); <sup>1</sup>H NMR (d<sub>6</sub>-acetone, 500 MHz) δ<sub>H</sub> 10.42 (br s, 1H, ArNH), 7.63 (d, 1H, ArCH, *J* 2.0 Hz), 7.31 (d, 1H, ArCH, *J* 8.5 Hz), 7.23 (dd, 1H, ArCH, *J* 8.5 Hz, 2.0 Hz), 3.91 (dd, 1H, SCH<sub>a</sub>H<sub>b</sub>, *J* 15.0 Hz, 6.0 Hz), 3.37 (ddd, 1H, SCH<sub>a</sub>H<sub>b</sub>, *J* 15.0 Hz, 12.5 Hz, 5.0 Hz), 3.28 (dt, 1H, NCH<sub>a</sub>H<sub>b</sub>, *J* 12.5 Hz, 6.0 Hz), 3.05 (ddd, 1H, SCH<sub>2</sub>CH<sub>a</sub>H<sub>b</sub>, *J* 15.5 Hz, 12.5 Hz, 6.0 Hz), 2.95-2.80 (m, 2H, NCH<sub>a</sub>H<sub>b</sub>, ArCH<sub>a</sub>H<sub>b</sub>), 2.65-2.60 (m, 2H, ArCH<sub>a</sub>H<sub>b</sub>, SCH<sub>2</sub>CH<sub>a</sub>H<sub>b</sub>), 1.72 (s, 3H, CH<sub>3</sub>); <sup>13</sup>C NMR (d<sub>6</sub>-acetone, 125 MHz) δ<sub>c</sub> 138.2 (ArC<sub>Br</sub>), 136.0 (ArC<sub>quat</sub>), 129.6 (ArC<sub>quat</sub>), 125.2 (ArCH), 121.6 (ArCH), 113.8 (ArCH), 112.7 (ArC<sub>quat</sub>), 108.6 (ArC<sub>quat</sub>), 59.8 (NCCH<sub>2</sub>), 46.7 (NCH<sub>2</sub>), 38.1 (SCH<sub>2</sub>), 34.0 (ArCH<sub>2</sub>), 28.0 (CH<sub>3</sub>), 20.5 (SCH<sub>2</sub>CH<sub>2</sub>); *m/z* (ES<sup>-</sup>) 355 ([M-H]<sup>-</sup>, 100%), HRMS (ES<sup>+</sup>) exact mass calculated for [M+Na]<sup>+</sup> (C<sub>14</sub>H<sub>15</sub>BrN<sub>2</sub>O<sub>2</sub>SN<sup>+</sup>) requires *m/z* 376.9930 & 378.9909, found *m/z* 376.9922 & 378.9900.

---

#### 2.7.5. Preparation and characterisation of 6d

##### (R)-9-bromo-11b-methyl-1,2,5,6,11,11b-hexahydro[1,2]thiazolo[2',3':1,2]pyrido[3,4-b]indole 3,3-dioxide



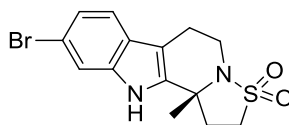

The title compound **6d** was synthesised according to general procedure **E** providing a white solid (81% yield, 91% e.e.). Chiralcel AD, 80:20 Hexane/IPA, 1ml/min, 220 nm, major  $t_R$  = 8.3 min, minor  $t_R$  = 32.0 min);  $[\alpha]_D^{25} = +148.2$  (c 0.23, 1:1 MeOH:CH<sub>2</sub>Cl<sub>2</sub>).

**Racemic-6d** was synthesised according to general procedure **F** as an off white solid.

**m.p.** 228 °C (decomposition); **FT-IR**  $\nu_{max}$  3369 (N–H), 1295 (S=O<sub>(as)</sub>), 1135 (S=O<sub>(sy)</sub>); **<sup>1</sup>H NMR** (CD<sub>3</sub>OD, 500 MHz)  $\delta_H$  7.48 (d, 1H, ArCH,  $J$  1.5 Hz), 7.34 (d, 1H, ArCH,  $J$  8.5 Hz), 7.14 (dd, 1H, ArCH,  $J$  8.5 Hz, 1.5 Hz), 3.94 (dd, 1H, NCH<sub>2</sub>H<sub>b</sub>,  $J$  15.0 Hz, 6.0 Hz), 3.38 (ddd, 1H, NCH<sub>a</sub>H<sub>b</sub>,  $J$  15.0 Hz, 12. Hz, 4.5 Hz), 3.34–3.27<sup>(signal hidden under methanol peak, confirmed by HSQC and COSY)</sup> (m, 1H, SCH<sub>2</sub>H<sub>b</sub>), 3.05 (ddd, 1H, NCH<sub>2</sub>CH<sub>a</sub>H<sub>b</sub>,  $J$  15.5 Hz, 12.0 Hz, 6.0 Hz), 2.92 (ddd, 1H, SCH<sub>2</sub>H<sub>b</sub>,  $J$  12.5 Hz, 10.0 Hz, 7.0 Hz), 2.76 (ddd, 1H, SCH<sub>2</sub>CH<sub>a</sub>H<sub>b</sub>,  $J$  13.5 Hz, 7.0 Hz, 5.5 Hz), 2.63–2.56 (m, 2H, NCH<sub>2</sub>CH<sub>a</sub>H<sub>b</sub>, SCH<sub>2</sub>CH<sub>a</sub>H<sub>b</sub>), 1.70 (s, 3H, CH<sub>3</sub>); **<sup>13</sup>C NMR** (CD<sub>3</sub>OD, 125 MHz)  $\delta_C$  138.6 (ArC<sub>quat</sub>), 137.1 (ArC<sub>quat</sub>), 127.0 (ArC<sub>quat</sub>), 123.3 (ArCH), 120.5 (ArCH), 116.1 (ArCBr), 114.9 (ArCH), 109.1 (ArC<sub>quat</sub>), 60.7 (NCCH<sub>3</sub>), 47.0 (SCH<sub>2</sub>), 38.6 (NCH<sub>2</sub>), 34.2 (SCH<sub>2</sub>CH<sub>2</sub>), 27.9 (NCCH<sub>3</sub>), 20.8 (NCH<sub>2</sub>CH<sub>2</sub>); **m/z** (ES+) 377 ([M+Na]<sup>+</sup>, 100%), **HRMS** (ES+) exact mass calculated for [M+Na]<sup>+</sup> (C<sub>14</sub>H<sub>15</sub>BrN<sub>2</sub>O<sub>2</sub>SNa<sup>+</sup>) requires  $m/z$  376.9930 & 378.9909, found  $m/z$  376.9928 & 378.9906.

## 2.7.6. Preparation and characterisation of 6e

### (*R*)-8-fluoro-11b-methyl-1,2,5,6,11,11b-hexahydro[1,2]thiazolo[2',3':1,2]pyrido[3,4-*b*]indole 3,3-dioxide

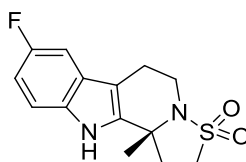

The title compound **6e** was synthesised according to general procedure **E** providing a white solid (85% yield, 93% e.e.). Chiralcel AD, 80:20 Hexane/IPA, 1ml/min, 220 nm, major  $t_R$  = 8.5 min, minor  $t_R$  = 26.9 min);  $[\alpha]_D^{25} = +164.3$  (c 0.21, 1:1 MeOH:CH<sub>2</sub>Cl<sub>2</sub>).

**Racemic-6e** was synthesised according to general procedure **F** as an off white solid.

**m.p.** 205 °C (decomposition); **FT-IR**  $\nu_{\max}$  (N–H), 1299 (S=O<sub>(as)</sub>), 1135 (S=O<sub>(sy)</sub>); **<sup>1</sup>H NMR** (CDCl<sub>3</sub>, 500 MHz)  $\delta_{\text{H}}$  7.74 (br s, 1H, ArNH), 7.25 (dd, 1H, ArCH, *J* 9.0 Hz, 4.5 Hz), 7.31 (dd, 1H, ArCH, *J* 9.0 Hz, 2.5 Hz), 6.95 (td, 1H, ArCH, *J* 9.0 Hz, 2.5 Hz), 4.05 (dd, 1H, NCH<sub>a</sub>H<sub>b</sub>, *J* 14.5 Hz, 5.5 Hz), 3.32 (ddd, 1H, NCH<sub>a</sub>H<sub>b</sub>, *J* 14.5, 12.0 Hz, 4.5 Hz), 3.23 (ddd, 1H, SCH<sub>a</sub>H<sub>b</sub>, *J* 12.0 Hz, 6.5 Hz, 5.0 Hz), 3.13 (ddd, 1H, NCH<sub>2</sub>CH<sub>a</sub>H<sub>b</sub>, *J* 15.5 Hz, 12.0 Hz, 5.5 Hz), 2.91 (ddd, 1H, SCH<sub>a</sub>H<sub>b</sub>, *J* 12.0 Hz, 10.5 Hz, 7.0 Hz), 2.68 (ddd, 1H, SCH<sub>2</sub>CH<sub>a</sub>H<sub>b</sub>, *J* 13.0 Hz, 7.5 Hz, 4.5 Hz), 2.65-2.54 (m, 2H, SCH<sub>2</sub>CH<sub>a</sub>H<sub>b</sub>, NCH<sub>2</sub>CH<sub>a</sub>H<sub>b</sub>), 1.72 (s, 3H, NCCH<sub>3</sub>); **<sup>13</sup>C NMR** (CDCl<sub>3</sub>, 125 MHz)  $\delta_{\text{C}}$  157.7 (d, ArCF, *J* 237.5 Hz), 135.8 (ArC<sub>quat</sub>), 132.3 (ArC<sub>quat</sub>), 127.3 (d, ArCH, *J* 9.5 Hz), 111.5 (d, ArCH, *J* 9.5 Hz), 111.0 (d, ArCH, *J* 26.7 Hz), 109.8 (d, ArC<sub>quat</sub>, *J* 5.0 Hz), 103.9 (d, ArCH, *J* 24.0 Hz), 59.0 (NCCH<sub>3</sub>), 45.9 (SCH<sub>2</sub>), 37.9 (NCH<sub>2</sub>), 33.5 (SCH<sub>2</sub>CH<sub>2</sub>), 28.1 (NCCH<sub>3</sub>), 19.9 (NCH<sub>2</sub>CH<sub>2</sub>); **<sup>19</sup>F NMR** (CDCl<sub>3</sub>, 376 MHz), -123.7 (ArF); ***m/z*** (ES+) 317 ([M+Na]<sup>+</sup>, 100%), **HRMS** (ES+) exact mass calculated for [M+Na]<sup>+</sup> (C<sub>14</sub>H<sub>15</sub>FN<sub>2</sub>O<sub>2</sub>SN<sup>+</sup>) requires *m/z* 317.0730 & 318.0763, found *m/z* 317.0724 & 318.0763.

---

### 2.7.7. Preparation and characterisation of 6f

#### (R)-9-fluoro-11b-methyl-1,2,5,6,11,11b-hexahydro[1,2]thiazolo[2',3':1,2]pyrido[3,4-*b*]indole 3,3-dioxide

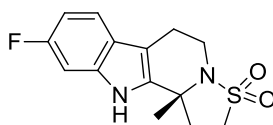

The title compound **6f** was synthesised according to general procedure **E** providing a white solid (85% yield, 83% e.e.). Chiralcel AD, 80:20 Hexane/IPA, 1ml/min, 220 nm, major *t<sub>R</sub>* = 7.4 min, minor *t<sub>R</sub>* = 25.1 min); [ $\alpha$ ]<sub>D</sub><sup>25</sup> = + 138.1 (c 0.24, 1:1 MeOH:CH<sub>2</sub>Cl<sub>2</sub>).

**Racemic-6f** was synthesised according to general procedure **F** as an off white solid: Chiralcel AD, 80:20 Hexane/IPA, 1ml/min, 220, major *t<sub>R</sub>* = 7.2 min, minor *t<sub>R</sub>* = 24.2 min);

**m.p.** 220 °C (decomposition); **FT-IR**  $\nu_{\max}$  3318 (N–H), 1280 (S=O<sub>(as)</sub>), 1122 (S=O<sub>(sy)</sub>); **<sup>1</sup>H NMR** (CDCl<sub>3</sub>, 500 MHz)  $\delta_{\text{H}}$  7.80 (br s, 1H, ArNH), 7.39 (dd, 1H, ArCH, *J* 8.5 Hz, 5.0 Hz), 7.03 (dd, 1H, ArCH, *J* 9.5 Hz, 2.0 Hz), 6.90 (ddd, 1H, ArCH, *J* 9.5 Hz, 8.5 Hz, 2.0 Hz), 4.04 (dd, 1H, NCH<sub>a</sub>H<sub>b</sub>, *J* 14.5 Hz, 5.5 Hz), 3.32 (ddd, 1H, NCH<sub>a</sub>H<sub>b</sub>, *J* 14.5 Hz, 12.0 Hz, 4.5 Hz), 3.23 (ddd, 1H, SCH<sub>a</sub>H<sub>b</sub>, *J* 12.0 Hz, 6.0 Hz, 4.5 Hz), 3.14 (ddd, 1H, NCH<sub>2</sub>CH<sub>a</sub>H<sub>b</sub>, *J* 15.5 Hz, 12.0 Hz, 6.0 Hz), 2.91 (ddd, 1H, SCH<sub>a</sub>H<sub>b</sub>, *J* 12.0 Hz, 10.5 Hz, 7.0 Hz), 2.68 (ddd, 1H, SCH<sub>2</sub>CH<sub>a</sub>H<sub>b</sub>, *J* 13.0 Hz, 7.0 Hz, 5.0 Hz), 2.64-2.57 (m, 2H, SCH<sub>2</sub>CH<sub>a</sub>H<sub>b</sub>, NCH<sub>2</sub>CH<sub>a</sub>H<sub>b</sub>), 1.72 (s, 3H, NCCH<sub>3</sub>); **<sup>13</sup>C NMR** (CDCl<sub>3</sub>, 125 MHz)  $\delta_{\text{C}}$  160.2 (d, ArCF, *J* 237.0 Hz), 135.9 (d, ArC<sub>quat</sub>, *J* 12.5 Hz), 134.1 (d, ArC<sub>quat</sub>, *J* 4.0 Hz), 123.4 (ArC<sub>quat</sub>), 119.4 (d, ArCH, *J* 10.5 Hz), 109.7 (ArC<sub>quat</sub>), 108.7 (d, ArCH, *J* 25.0 Hz), 97.6 (d, ArCH, *J* 26.5 Hz), 59.0 (NCCH<sub>3</sub>), 45.9 (SCH<sub>2</sub>), 37.9 (NCH<sub>2</sub>), 33.4 (SCH<sub>2</sub>CH<sub>2</sub>), 28.1 (NCCH<sub>3</sub>), 19.8 (NCH<sub>2</sub>CH<sub>2</sub>); **<sup>19</sup>F NMR** (CDCl<sub>3</sub>, 376 MHz), -119.6 (ArF); ***m/z*** (ES+) 317

([M+Na]<sup>+</sup>, 100%), **HRMS** (ES+) exact mass calculated for [M+Na]<sup>+</sup> (C<sub>14</sub>H<sub>15</sub>FN<sub>2</sub>O<sub>2</sub>SNa<sup>+</sup>) requires *m/z* 317.0730 & 318.0763, found *m/z* 317.0728 & 318.0767.

---

### 2.7.8. Preparation and characterisation of 6g

#### **(R)-11b-methyl-1,2,5,6,11,11b-hexahydro[1,2]thiazolo[2',3':1,2]pyrido[3,4-b]indole-8-carbonitrile 3,3-dioxide**

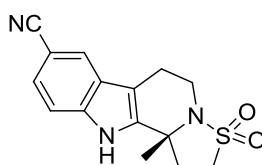

The title compound **6g** was synthesised according to general procedure **E** providing a white solid (60% yield, 96% e.e.). Chiralcel AD, 80:20 Hexane/IPA, 1ml/min, 220 nm, major *t<sub>R</sub>* = 13.1 min, minor *t<sub>R</sub>* = 53.6 min); [ $\alpha$ ]<sub>D</sub><sup>25</sup> = +95.9 (c 0.16, 1:1 MeOH:CH<sub>2</sub>Cl<sub>2</sub>).

**Racemic-6g** was synthesised according to general procedure **F** as an off white solid.

**m.p.** 210 °C (decomposition); **FT-IR**  $\nu_{\max}$  3316 (N–H), 2219 (C≡N), 1302 (S=O<sub>(as)</sub>), 1134 (S=O<sub>(sy)</sub>); **<sup>1</sup>H NMR** (CD<sub>3</sub>OD, 500 MHz)  $\delta_{\text{H}}$  7.90 (s, 1H, ArCH), 7.46 (d, 1H, ArCH, *J* 8.5 Hz), 7.43 (dd, 1H, ArCH, *J* 8.5 Hz, 1.5 Hz), 3.97 (dd, 1H, NCH<sub>2</sub>H<sub>b</sub>, *J* 15.0 Hz, 5.5 Hz), 3.41 (ddd, 1H, NCH<sub>a</sub>H<sub>b</sub>, *J* 15.0 Hz, 11.5 Hz, 4.5 Hz), 3.35–3.30 (signal hidden under methanol peak, confirmed by HSQC and COSY) (m, 1H, SCH<sub>a</sub>H<sub>b</sub>), 3.09 (ddd, 1H, NCH<sub>2</sub>CH<sub>a</sub>H<sub>b</sub>, *J* 15.5 Hz, 12.0 Hz, 6.0 Hz), 2.94 (ddd, 1H, SCH<sub>a</sub>H<sub>b</sub>, *J* 12.5 Hz, 9.5 Hz, 7.0 Hz), 2.78 (ddd, 1H, SCH<sub>2</sub>CH<sub>a</sub>H<sub>b</sub>, *J* 13.0 Hz, 7.0 Hz, 5.5 Hz), 2.71–2.59 (m, 2H, SCH<sub>2</sub>CH<sub>a</sub>H<sub>b</sub>, NCH<sub>2</sub>CH<sub>a</sub>H<sub>b</sub>), 1.72 (s, 3H, NCCH<sub>3</sub>); **<sup>13</sup>C NMR** (CD<sub>3</sub>OD, 125 MHz)  $\delta_{\text{C}}$  139.7 (ArC<sub>quat</sub>), 139.2 (ArC<sub>quat</sub>), 128.0 (ArC<sub>quat</sub>), 125.9 (ArCH), 124.9 (ArCH), 121.8 (ArCCN), 113.2 (ArCH), 110.0 (ArCN), 102.8 (ArC<sub>quat</sub>), 60.5 (NCCH<sub>3</sub>), 47.0 (SCH<sub>2</sub>), 38.4 (NCH<sub>2</sub>), 34.1 (SCH<sub>2</sub>CH<sub>2</sub>), 27.8 (NCCH<sub>3</sub>), 20.7 (NCH<sub>2</sub>CH<sub>2</sub>); **m/z** (ES+) 324 ([M+Na]<sup>+</sup>, 100%), **HRMS** (ES+) exact mass calculated for [M+Na]<sup>+</sup> (C<sub>15</sub>H<sub>15</sub>N<sub>3</sub>O<sub>2</sub>SNa<sup>+</sup>) requires *m/z* 324.0777 & 325.0810, found *m/z* 324.0775 & 325.0818.

---

### 2.7.9. Preparation and characterisation of 6h

#### **(R)-8-methoxy-11b-methyl-1,2,5,6,11,11b-hexahydro[1,2]thiazolo[2',3':1,2]pyrido[3,4-b]indole 3,3-dioxide**

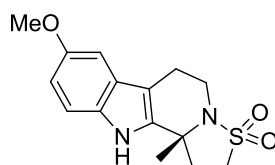

The title compound **6h** was synthesised according to general procedure **E** providing a white solid (75% yield, 80% e.e.). Chiralcel AD, 80:20 Hexane/IPA, 1ml/min, 220 nm, major  $t_R = 8.2$  min, minor  $t_R = 14.3$  min);  $[\alpha]_D^{25} = 93.2$  (c 0.734, 1:1 MeOH:CH<sub>2</sub>Cl<sub>2</sub>).

**Racemic-6h** was synthesised according to general procedure **F** as an off white solid.

**m.p.** 210-220 °C (decomposition); **FT-IR**  $\nu_{max}$  3365 (N-H), 2506 (ArOC-H), 1298 (S=O<sub>(as)</sub>), 1137 (S=O<sub>(sy)</sub>); **<sup>1</sup>H NMR** (CD<sub>3</sub>OD, 500 MHz)  $\delta_H$  7.21 (d, 1H, ArCH,  $J$  9.0 Hz), 6.92 (d, 1H, ArCH,  $J$  2.5 Hz), 6.77 (dd, 1H, ArCH,  $J$  9.0 Hz, 2.5 Hz), 3.93 (dd, 1H, NCH<sub>a</sub>H<sub>b</sub>,  $J$  14.5 Hz, 5.5 Hz), 3.82 (s, 3H, OCH<sub>3</sub>), 3.38 (ddd, 1H, NCH<sub>a</sub>H<sub>b</sub>,  $J$  14.5 Hz, 12.0 Hz, 4.5 Hz), 3.28 (dt, 1H, SCH<sub>a</sub>H<sub>b</sub>,  $J$  12.0 Hz, 6.0 Hz), 3.05 (ddd, 1H, NCH<sub>2</sub>CH<sub>a</sub>H<sub>b</sub>,  $J$  15.5 Hz, 12.0 Hz, 6.0 Hz), 2.90 (ddd, 1H, SCH<sub>a</sub>H<sub>b</sub>,  $J$  12.5 Hz, 10.0 Hz, 7.0 Hz), 2.77 (ddd, 1H, SCH<sub>2</sub>CH<sub>a</sub>H<sub>b</sub>,  $J$  13.0 Hz, 7.0 Hz, 5 Hz), 2.58 (m, 2H, SCH<sub>2</sub>CH<sub>a</sub>CH<sub>b</sub>, NCH<sub>2</sub>CH<sub>a</sub>H<sub>b</sub>), 1.70 (s, 3H, NCCH<sub>3</sub>); **<sup>13</sup>C NMR** (CD<sub>3</sub>OD, 125 MHz)  $\delta_C$  155.3 (ArCO), 136.8 (ArC<sub>quat</sub>), 133.0 (ArC<sub>quat</sub>), 128.3 (ArC<sub>quat</sub>), 112.9 (ArCH), 112.7 (ArCH), 108.6 (ArC<sub>quat</sub>), 101.2 (ArCH), 61.0 (NCCH<sub>3</sub>), 56.3 (OCH<sub>3</sub>), 47.1 (SCH<sub>2</sub>), 38.8 (NCH<sub>2</sub>), 34.3 (SCH<sub>2</sub>CH<sub>2</sub>), 28.1 (NCCH<sub>3</sub>), 21.0 (NCH<sub>2</sub>CH<sub>2</sub>); **m/z** (ES-) 305 ([M-H]<sup>-</sup>, 100%), **HRMS** (ES+) exact mass calculated for [M+Na]<sup>+</sup> (C<sub>15</sub>H<sub>18</sub>N<sub>2</sub>O<sub>3</sub>SN<sup>+</sup>) requires  $m/z$  329.0930 & 330.0963, found  $m/z$  329.0917 & 330.0965.

### 2.7.1. Preparation and characterisation of 6i

#### (R)-8,11b-dimethyl-1,2,5,6,11,11b-hexahydro[1,2]thiazolo[2',3':1,2]pyrido[3,4-b]indole 3,3-dioxide

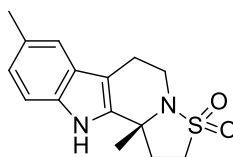

The title compound **6i** was synthesised according to general procedure **E** providing a white solid (84% yield, 87% e.e.). Chiralcel AD, 80:20 Hexane/IPA, 1ml/min, 220 nm, major  $t_R = 6.7$  min, minor  $t_R = 14.0$  min);  $[\alpha]_D^{25} = 101.3$  (c 0.20, 1:1 MeOH:CH<sub>2</sub>Cl<sub>2</sub>).

**Racemic-6i** was synthesised according to general procedure **F** as an off white solid.

**m.p.** 220 °C (decomposition); **FT-IR**  $\nu_{max}$  3390 (N-H), 1300 (S=O<sub>(as)</sub>), 1141 (S=O<sub>(sy)</sub>); **<sup>1</sup>H NMR** (CD<sub>3</sub>OD, 500 MHz)  $\delta_H$  7.21 (br s, 1H, ArCH), 7.20 (d, 1H, ArCH,  $J$  8.0 Hz), 6.95 (dd, 1H, ArCH,  $J$  8.0 Hz, 1.5 Hz), 3.93 (dd, 1H, NCH<sub>a</sub>H<sub>b</sub>,  $J$  14.5 Hz, 5.5 Hz), 3.42-

3.35 (m, 1H, NCH<sub>a</sub>H<sub>b</sub>), 3.35-3.26 (m, 1H, SCH<sub>a</sub>H<sub>b</sub>), 3.05 (ddd, 1H, NCH<sub>2</sub>CH<sub>a</sub>H<sub>b</sub>, *J* 15.5 Hz, 12 Hz, 6.0 Hz), 2.91 (ddd, 1H, SCH<sub>a</sub>H<sub>b</sub>, *J* 12.0 Hz, 10.0 Hz, 7.0 Hz), 2.78 (ddd, 1H, SCH<sub>2</sub>CH<sub>a</sub>H<sub>b</sub>, *J* 13.5 Hz, 7.0 Hz, 5.0 Hz), 2.62-2.54 (m, 2H, SCH<sub>2</sub>CH<sub>a</sub>H<sub>b</sub>, NCH<sub>2</sub>CH<sub>a</sub>H<sub>b</sub>), 2.41 (s, 3H, ArCH<sub>3</sub>), 1.70 (s, 3H, NCCH<sub>3</sub>); <sup>13</sup>C NMR (CD<sub>3</sub>OD, 125 MHz) δ<sub>C</sub> 136.2 (ArC<sub>quat</sub>), 136.1 (ArC<sub>quat</sub>), 129.2 (ArC<sub>quat</sub>), 128.3 (ArC<sub>quat</sub>), 124.4 (ArCH), 118.7 (ArCH), 111.7 (ArCH), 108.3 (ArC<sub>quat</sub>), 61.0 (NCCH<sub>3</sub>), 47.1 (SCH<sub>2</sub>), 38.8 (NCH<sub>2</sub>), 34.3 (SCH<sub>2</sub>CH<sub>2</sub>), 28.1 (NCCH<sub>3</sub>), 21.6 (ArCH<sub>3</sub>), 20.9 (NCH<sub>2</sub>CH<sub>2</sub>); *m/z* (ES+) 313 ([M+Na]<sup>+</sup>, 100%), HRMS (ES+) exact mass calculated for [M+Na]<sup>+</sup> (C<sub>15</sub>H<sub>18</sub>N<sub>2</sub>O<sub>2</sub>SNa<sup>+</sup>) requires *m/z* 313.0981 & 314.1014, found *m/z* 313.0973 & 314.1008.

---

### 2.7.2. Preparation and characterisation of 6j

#### (*R*)-10,11b-dimethyl-1,2,5,6,11,11b-hexahydro[1,2]thiazolo[2',3':1,2]pyrido[3,4-b]indole 3,3-dioxide

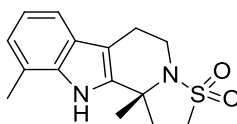

The title compound **6j** was synthesised according to general procedure **E** providing a white solid (85% yield, 92% e.e.). Chiralcel AD, 80:20 Hexane/IPA, 1ml/min, 220 nm, major *t<sub>R</sub>* = 5.0 min, minor *t<sub>R</sub>* = 6.1 min); [α]<sub>D</sub><sup>25</sup> = +182.1 (c 0.25, 1:1 MeOH:CH<sub>2</sub>Cl<sub>2</sub>).

**Racemic-6j** was synthesised according to general procedure **F** as an off white solid.

**m.p.** 195 °C (decomposition); **FT-IR** *v*<sub>max</sub> 3338 (N-H), 1296 (S=O<sub>(as)</sub>), 1125 (S=O<sub>(sy)</sub>); <sup>1</sup>H NMR (CD<sub>3</sub>OD, 500 MHz) δ<sub>H</sub> 7.25 (dd, 1H, ArCH, *J* 7.0 Hz, 2.0 Hz), 6.94 (t, 1H, ArCH, *J* 7.0 Hz), 6.91 (d, 1H, ArCH, *J* 7.0 Hz), 3.93 (dd, 1H, NCH<sub>a</sub>H<sub>b</sub>, *J* 15.0 Hz, 5.5 Hz), 3.38 (ddd, 1H, NCH<sub>a</sub>H<sub>b</sub>, *J* 15.0 Hz, 12.0 Hz, 4.5 Hz), 3.28 (m, 1H, SCH<sub>a</sub>H<sub>b</sub>), 3.07 (ddd, 1H, NCH<sub>2</sub>CH<sub>a</sub>H<sub>b</sub>, *J* 15.5 Hz, 12.0 Hz, 6.0 Hz), 2.94-2.83 (m, 2H, SCH<sub>a</sub>H<sub>b</sub>, SCH<sub>2</sub>CH<sub>a</sub>H<sub>b</sub>), 2.65-2.56 (m, 2H, NCH<sub>2</sub>CH<sub>a</sub>H<sub>b</sub>, SCH<sub>2</sub>CH<sub>a</sub>H<sub>b</sub>), 2.50 (s, 3H, ArCH<sub>3</sub>), 1.74 (s, 3H, NCCH<sub>3</sub>); <sup>13</sup>C NMR (CD<sub>3</sub>OD, 125 MHz) δ<sub>C</sub> 137.2 (ArC<sub>quat</sub>), 135.9 (ArC<sub>quat</sub>), 127.7 (ArC<sub>quat</sub>), 123.6 (ArCH), 121.6 (ArC<sub>quat</sub>), 120.4 (ArCH), 116.7 (ArCH), 109.2 (ArC<sub>quat</sub>), 61.1 (NCCH<sub>3</sub>), 47.1 (SCH<sub>2</sub>), 38.7 (NCH<sub>2</sub>), 34.2 (SCH<sub>2</sub>CH<sub>2</sub>), 28.0 (NCCH<sub>3</sub>), 21.1 (NCH<sub>2</sub>CH<sub>2</sub>), 17.1 (ArCH<sub>3</sub>); *m/z* (ES+) 313 ([M+Na]<sup>+</sup>, 100%), HRMS (ES+) exact mass calculated for [M+Na]<sup>+</sup> (C<sub>15</sub>H<sub>18</sub>N<sub>2</sub>O<sub>2</sub>SNa<sup>+</sup>) requires *m/z* 313.0981 & 314.1014, found *m/z* 313.0974 & 314.1017.

---

### 2.7.3. Preparation and characterisation of 6k

#### (*R*)-10-ethyl-11b-methyl-1,2,5,6,11,11b-hexahydro[1,2]thiazolo[2',3':1,2]pyrido[3,4-b]indole 3,3-dioxide

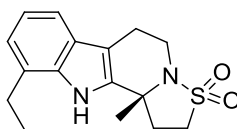

The title compound **6k** was synthesised according to general procedure **E** providing a white solid (83% yield, 95% e.e.). Chiralcel AD, 80:20 Hexane/IPA, 1ml/min, 220 nm, major  $t_R = 7.9$  min, minor  $t_R = 10.2$  min);  $[\alpha]_D^{25} = +204.4$  (c 0.09, 1:1 MeOH:CH<sub>2</sub>Cl<sub>2</sub>).

**Racemic-6k** was synthesised according to general procedure **F** as an off white solid: Chiralcel AD, 80:20 Hexane/IPA, 1ml/min, 220, major  $t_R = 8.0$  min, minor  $t_R = 10.3$  min);

**m.p.** 190 °C (decomposition); **FT-IR**  $\nu_{max}$  3341 (N-H), 1296 (S=O<sub>(as)</sub>), 1124 (S=O<sub>(sy)</sub>); **<sup>1</sup>H NMR** (CD<sub>3</sub>OD, 500 MHz)  $\delta_H$  7.25 (dd, 1H, ArCH,  $J$  7.0 Hz, 2.5 Hz), 6.99-6.94 (m, 2H, ArCH), 3.93 (dd, 1H, NCH<sub>a</sub>H<sub>b</sub>,  $J$  15.0 Hz, 5.5 Hz), 3.39 (ddd, 1H, NCH<sub>a</sub>H<sub>b</sub>,  $J$  15.0 Hz, 12.0 Hz, 4.5 Hz), 3.29 (dd, 1H, SCH<sub>a</sub>H<sub>b</sub>,  $J$  11.5 Hz, 7.0 Hz, 5.0 Hz), 3.07 (ddd, 1H, NCH<sub>2</sub>CH<sub>a</sub>H<sub>b</sub>,  $J$  15.5 Hz, 12.0 Hz, 6.0 Hz), 2.95-2.83 (m, 4H, ArCH<sub>2</sub>CH<sub>3</sub>, SCH<sub>2</sub>CH<sub>a</sub>H<sub>b</sub>, SCH<sub>a</sub>H<sub>b</sub>), 2.65-2.57 (m, 2H, SCH<sub>2</sub>CH<sub>a</sub>H<sub>b</sub>, NCH<sub>2</sub>CH<sub>a</sub>CH<sub>b</sub>), 1.74 (s, 3H, NCCH<sub>3</sub>), 1.34 (t, 3H, ArCH<sub>2</sub>CH<sub>3</sub>,  $J$  7.5 Hz); **<sup>13</sup>C NMR** (CD<sub>3</sub>OD, 125 MHz)  $\delta_C$  136.4 (ArC<sub>quat</sub>), 135.8 (ArC<sub>quat</sub>), 128.1 (ArC<sub>quat</sub>), 127.9 (ArC<sub>quat</sub>), 121.7 (ArCH), 120.5 (ArCH), 116.7 (ArCH), 109.2 (ArC<sub>quat</sub>), 61.1 (NCCH<sub>3</sub>), 47.1 (SCH<sub>2</sub>), 38.7 (NCH<sub>2</sub>), 34.2 (SCH<sub>2</sub>CH<sub>2</sub>), 28.0 (NCCH<sub>3</sub>), 25.1 (ArCH<sub>2</sub>CH<sub>3</sub>), 21.1 (NCH<sub>2</sub>CH<sub>2</sub>), 14.9 (ArCH<sub>2</sub>CH<sub>3</sub>); **m/z** (ES+) 327 ([M+Na]<sup>+</sup>, 100%), **HRMS** (ES+) exact mass calculated for [M+Na]<sup>+</sup> (C<sub>16</sub>H<sub>20</sub>N<sub>2</sub>O<sub>2</sub>SN<sup>+</sup>) requires  $m/z$  327.1138 & 328.1171, found  $m/z$  327.1135 & 328.1180.

## 2.8. Methodology extention for amide derivatives

### 2.9. General procedure G for the preparation of 9

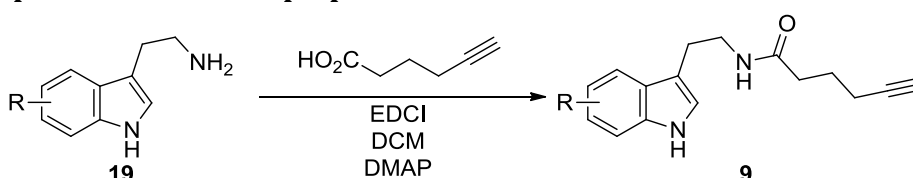

Hexynoic acid (1 eq) was added in one portion to a suspension of (1.5 eq) and DMAP (0.04 eq) in dichloromethane (3 ml/mmol of hexynoic acid) under argon and the mixture was stirred for 5 mins. A solution of tryptamine **19** (1.4 eq) in dichloromethane (7 ml/mmol of hexynoic acid) was added to the solution. The reaction mixture was stirred at rt for 12 h. Upon completion hydrochloric acid solution (1M, 10 ml) was added. The layers were separated and the aqueous was extracted with dichloromethane (2 × 20 ml). The combined organics were washed with brine, dried over sodium sulfate and concentrated *in vacuo*. The residue was purified by flash column chromatography (CH<sub>2</sub>Cl<sub>2</sub>:Et<sub>2</sub>O, 1:0 to 7:3).

#### 2.9.1. Preparation and characterisation of 9a

##### *N*-[2-(1*H*-indol-3-yl)ethyl]hex-5-ynamide

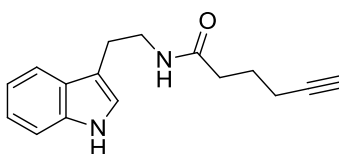

The title compound **9a** was synthesis according to general procedure **G** as a white solid (86% yield) and re-crystallized from ethanol.

**m.p.** 89-91 °C; **FT-IR**  $\nu_{\max}$  3403 (N–H), 3286 (ArN–H), 1641 (C=O); **<sup>1</sup>H NMR** (CDCl<sub>3</sub>, 400 MHz)  $\delta_{\text{H}}$  8.29 (br s, 1H, ArNH), 7.62 (d, 1H, ArCH, *J* 8.0 Hz), 7.39 (d, 1H, ArCH, *J* 8.0 Hz), 7.23 (t, 1H, ArCH, *J* 7.5 Hz), 7.14 (t, 1H, ArCH, *J* 7.5 Hz), 7.04 (d, 1H, ArCH, *J* 2.0 Hz), 5.63 (br s, 1H, OCNH), 3.62 (q, 2H, NCH<sub>2</sub>, *J* 6.5 Hz), 2.99 (t, 2H, NCH<sub>2</sub>CH<sub>2</sub>, *J* 6.5 Hz), 2.25 (t, 2H, OCCH<sub>2</sub>, *J* 7.5 Hz), 2.22 (td, 2H, HC≡CCH<sub>2</sub>, *J* 7.5 Hz, 2.5 Hz), 1.94 (t, 1H, C≡CH, *J* 2.5 Hz), 1.84 (quin, 2H, OCCH<sub>2</sub>CH<sub>2</sub>, *J* 7.5 Hz); **<sup>13</sup>C NMR** (CDCl<sub>3</sub>, 100 MHz)  $\delta_{\text{C}}$  172.2 (C=O), 136.4 (ArC<sub>quat</sub>), 127.3 (ArC<sub>quat</sub>), 122.2 (ArCH), 122.1 (ArCH), 119.5 (ArCH), 118.7 (ArCH), 112.9 (ArC<sub>quat</sub>), 111.3 (ArCH), 83.6 (HC≡C), 69.2 (C≡CH), 39.7 (NCH<sub>2</sub>), 35.1 (OCCH<sub>2</sub>), 25.3 (NCH<sub>2</sub>CH<sub>2</sub>), 24.2 (OCCH<sub>2</sub>CH<sub>2</sub>), 17.8 (HC≡CCH<sub>2</sub>); ***m/z*** (ES+) 277 ([M+Na]<sup>+</sup>, 100%), **HRMS** (ES+) exact mass calculated for [M+Na]<sup>+</sup> (C<sub>16</sub>H<sub>18</sub>N<sub>2</sub>NaO<sup>+</sup>) requires *m/z* 277.1311 & 278.1345, found *m/z* 277.1316 & 278.1346.

## 2.9.2. Preparation and characterisation 9b

### of *N*-[2-(7-bromo-1*H*-indol-3-yl)ethyl]hex-5-ynamide

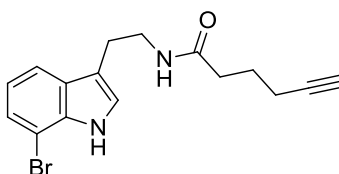

The title compound **9b** was synthesis according to general procedure **G** as a brown solid (65% yield) trituration (Et<sub>2</sub>O and re-crystallized from ethanol.)

**m.p.** 87-89 °C; **FT-IR**  $\nu_{\max}$  3400 (N–H), 3300 (ArN–H), 1636 (C=O); **<sup>1</sup>H NMR** (DMSO-*d*<sub>6</sub>, 400 MHz)  $\delta_{\text{H}}$  11.05 (br s, 1H, ArNH), 7.93 (t, 1H, OCNH, *J* 6.5 Hz), 7.55 (d, 1H, ArCH, *J* 7.5 Hz), 7.28 (d, 1H, ArCH, *J* 7.5 Hz), 7.21 (d, 1H, ArCH, *J* 2.0 Hz), 6.94 (t, 1H, ArCH, *J* 7.5 Hz), 3.32 (q, 2H, NCH<sub>2</sub>, *J* 6.5 Hz), 2.80 (t, 2H, OCCH<sub>2</sub>, *J* 7.5 Hz), 2.78 (t, 1H, C≡CH, *J* 2.5 Hz), 2.18-2.10 (m, 4H, ArCH<sub>2</sub>, HC≡CCH<sub>2</sub>), 1.65 (quin, 2H, OCCH<sub>2</sub>CH<sub>2</sub>, *J* 7.5 Hz); **<sup>13</sup>C NMR** (CDCl<sub>3</sub>, 100 MHz)  $\delta_{\text{C}}$  172.2 (C=O), 135.3 (ArC<sub>quat</sub>), 129.9 (ArC<sub>quat</sub>), 124.9 (ArCH), 124.3 (ArCH), 120.6 (ArCH), 118.8 (ArCH), 114.3 (ArC<sub>quat</sub>), 105.1 (ArCBr), 85.0 (HC≡C), 72.3 (C≡CH), 41-39.7 (signal hidden under DMSO peak, confirmed by HSQC and COSY) (NCH<sub>2</sub>) 35.1 (ArCH<sub>2</sub>), 26.0 (OCCH<sub>2</sub>) 25.1 (OCCH<sub>2</sub>CH<sub>2</sub>), 18.3 (HC≡CCH<sub>2</sub>); ***m/z*** (ES+) 355 ([M+Na]<sup>+</sup>, 100%), **HRMS** (ES+) exact mass calculated for [M+Na]<sup>+</sup> (C<sub>16</sub>H<sub>17</sub>N<sub>2</sub>BrNaO<sup>+</sup>) requires *m/z* 355.0416 & 357.0397, found *m/z* 355.0404 & 357.0385.

### 2.9.3. Preparation and Characterisation of 9c<sup>10</sup>

#### *N*-[2-(7-methyl-1*H*-indol-3-yl)ethyl]hex-5-ynamide

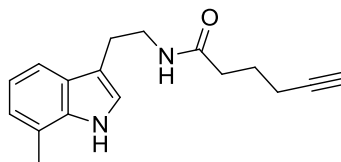

The title compound **9c** was synthesis according to general procedure **G** as a white solid (56% yield) and re-crystallized from ethanol.

**m.p.** 76-77 °C; **FT-IR**  $\nu_{\max}$  3402 (ArNH), 3288 (NH), 1648 (C=O); **<sup>1</sup>H NMR** (CDCl<sub>3</sub>, 500 MHz)  $\delta_{\text{H}}$  8.00 (br s, 1H, ArNH), 7.47 (d, 1H, ArCH, *J* 7.5 Hz), 7.07 (t, 1H, ArCH, *J* 7.5 Hz), 7.07 (d, 1H, ArCH, *J* 2.5 Hz), 7.03 (d, 1H, ArCH, *J* 7.5 Hz), 5.55 (br s, 1H, OCNH), 3.62 (q, 2H, NCH<sub>2</sub>, *J* 6.5 Hz), 2.98 (t, 2H, NCH<sub>2</sub>CH<sub>2</sub>, *J* 6.5 Hz), 2.50 (s, 3H, ArCH<sub>3</sub>), 2.25 (t, 2H, OCCH<sub>2</sub>, *J* 7.5 Hz), 2.23 (td, 2H, HC≡CCH<sub>2</sub>, *J* 7.5 Hz, 2.5 Hz), 1.93 (t, 1H, C≡CH, *J* 2.5 Hz), 1.84 (quin, 2H, OCCH<sub>2</sub>CH<sub>2</sub>, *J* 7.5 Hz); **<sup>13</sup>C NMR** (CDCl<sub>3</sub>, 125 MHz)  $\delta_{\text{C}}$  172.0 (C=O), 136.0 (ArC<sub>quat</sub>), 126.8 (ArC<sub>quat</sub>), 122.8 (ArCH), 121.7 (ArCH), 120.4 (ArC<sub>quat</sub>), 119.8 (ArCH), 116.4 (ArCH), 113.6 (ArC<sub>quat</sub>), 83.6 (HC≡C), 69.1 (HC≡C), 39.7 (NCH<sub>2</sub>), 35.1 (OCCH<sub>2</sub>), 25.5 (NCH<sub>2</sub>CH<sub>2</sub>), 24.1 (OCCH<sub>2</sub>CH<sub>2</sub>), 17.8 (HC≡CCH<sub>2</sub>), 16.6 (ArCH<sub>3</sub>); ***m/z*** (ES<sup>+</sup>) 291 ([M+Na]<sup>+</sup>, 100%), **HRMS** (ES<sup>+</sup>) exact mass calculated for [M+Na]<sup>+</sup> (C<sub>17</sub>H<sub>20</sub>N<sub>2</sub>NaO<sup>+</sup>) requires *m/z* 291.1468 & 292.1501, found *m/z* 291.1470 & 292.1503.

### 2.9.4. Preparation and Characterisation of 9d

#### *N*-[2-(7-ethyl-1*H*-indol-3-yl)ethyl]hex-5-ynamide

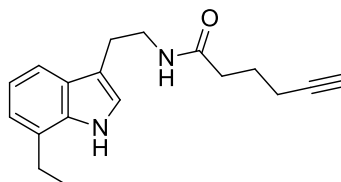

The title compound **9d** was synthesis according to general procedure **G** as a yellow oil (45% yield).

**FT-IR**  $\nu_{\max}$  3404 (NH), 3289 (ArN-H), 1649 (C=O); **<sup>1</sup>H NMR** (CDCl<sub>3</sub>, 400 MHz)  $\delta_{\text{H}}$  8.17 (br s, 1H, ArNH), 7.48 (d, 1H, ArCH, *J* 7.5 Hz), 7.11 (t, 1H, ArCH, *J* 7.5 Hz), 7.07 (d, 1H, ArCH, *J* 7.5 Hz), 7.05 (d, 1H, ArCH, *J* 2.0 Hz), 5.61 (br s, 1H, OCNH), 3.62 (q, 2H, NCH<sub>2</sub>, *J* 6.5 Hz), 2.98 (t, 2H, NCH<sub>2</sub>CH<sub>2</sub>, *J* 6.5 Hz), 2.88 (q, 2H, ArCH<sub>2</sub>CH<sub>3</sub>, *J* 7.5 Hz), 2.25 (t, 2H, OCCH<sub>2</sub>, *J* 7.5 Hz), 2.23 (td, 2H, HC≡CCH<sub>2</sub>, *J* 7.5 Hz, 2.5 Hz) 1.94 (t, 1H, C≡CH, *J* 2.5 Hz), 1.84 (quint, 2H, OCCH<sub>2</sub>CH<sub>2</sub>, *J* 7.0 Hz), 1.38 (t, 3H, ArCH<sub>2</sub>CH<sub>3</sub>, *J* 7.5 Hz);



<sup>13</sup>C NMR (CDCl<sub>3</sub>, 100 MHz) δ<sub>c</sub> 172.2 (C=O), 135.3 (ArC<sub>quat</sub>), 127.1 (ArC<sub>quat</sub>), 126.7 (ArC<sub>quat</sub>), 121.7 (ArCH), 120.8 (ArCH), 119.8 (ArCH), 116.5 (ArCH), 113.4 (ArC<sub>quat</sub>), 83.6 (HC≡C), 69.1 (C≡CH), 39.7 (NCH<sub>2</sub>), 35.1 (OCCH<sub>2</sub>), 25.5 (NCCH<sub>2</sub>CH<sub>2</sub>), 24.2 (OCCH<sub>2</sub>CH<sub>2</sub>), 24.0 (ArCH<sub>2</sub>CH<sub>3</sub>), 17.8 (HC≡CCH<sub>2</sub>), 13.8 (ArCH<sub>2</sub>CH<sub>3</sub>); *m/z* (ES+) 305 ([M+H]<sup>+</sup>, 100%), HRMS (ES+) exact mass calculated for [M+Na]<sup>+</sup> (C<sub>18</sub>H<sub>22</sub>N<sub>2</sub>NaO<sup>+</sup>) requires *m/z* 305.1624 & 306.1658, found *m/z* 305.1624 & 306.1661.

## 2.10. General procedure H for the racemic preparation of cyclic amides 10

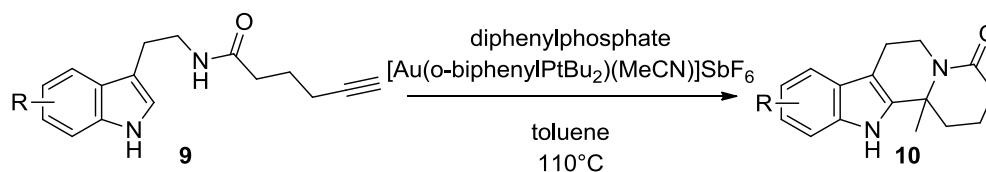

To a foil covered flask [Au(o-biphenylPtBu<sub>2</sub>)(MeCN)]SbF<sub>6</sub> (**8**) (0.05 eq), diphenylphosphate (0.1 eq) and desired amide derivative (**9**) (1 eq) were added and placed under nitrogen atmosphere. Toluene (14 ml/1 mmol of **9**) was added in one portion and the reaction was heated to 110 °C and left for 48 to 72 hours. The solvent was removed *in vacuo* and purified by flash column chromatography (CH<sub>2</sub>Cl<sub>2</sub> : Et<sub>2</sub>O, 1 : 0 to 7 : 3).

## 2.11. General procedure I for the Enantioselective preparation of cyclic amides 10

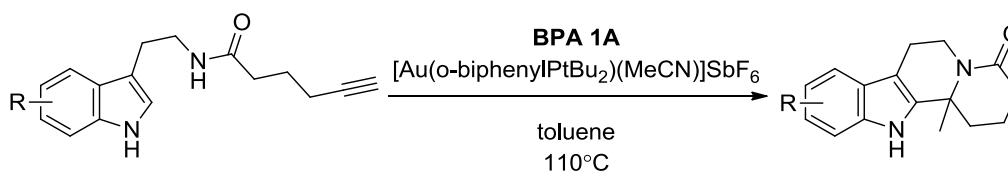

To a foil covered flask [Au(o-biphenylPtBu<sub>2</sub>)(MeCN)]SbF<sub>6</sub> (**8**) (0.01 eq) was added in dichloromethane (1 ml/ 0.15 mmol of **9**), the dichloromethane was subsequently removed *via* stream of nitrogen. **BPA 1A** (0.1 eq) and desired amide derivative (**9**) (0.15 mmol, 1 eq) was added and placed under nitrogen atmosphere. Toluene (21 ml) was added in one portion and the reaction was heated to 110 °C typically for 20 to 72 h until TLC shows consumption of starting material. The solvent was removed *in vacuo* and purified by flash column chromatography (DCM : Et<sub>2</sub>O, 1 : 0 to 7 : 3).

### 2.11.1. Preparation and characterisation of 10a

#### (*R*)-12b-methyl-2,3,6,7,12,12b-hexahydroindolo[2,3-*a*]quinolizin-4(1*H*)-one

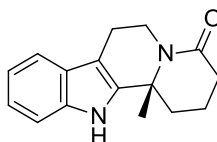

The title compound **10a** was synthesis according to general procedure I as a white solid (86% yield, 66% e.e.). Chiralcel AD, 80:20 Hexane/IPA, 1ml/min, 220, major  $t_R = 5.1$  min, minor  $t_R = 11.8$  min);  $[\alpha]_D^{25} = +157.7$  (c 0.26,  $\text{CH}_2\text{Cl}_2$ ).

**Racemic-10a** was synthesised according to general procedure H as a white solid.

**m.p.** 180 °C (decomposition); **FT-IR**  $\nu_{\text{max}}$  3254 (N–H), 1606 (C=O);  **$^1\text{H NMR}$**  ( $\text{CDCl}_3$ , 400 MHz)  $\delta_H$  8.38 (br s, 1H, ArNH), 7.51 (d, 1H, ArCH,  $J$  7.5 Hz), 7.34 (d, 1H, ArCH,  $J$  7.5 Hz), 7.19 (t, 1H, ArCH,  $J$  7.5 Hz), 7.13 (t, 1H, ArCH,  $J$  7.5 Hz), 5.13 (dd, 1H,  $\text{NCH}_a\text{H}_b$ ,  $J$  12.5 Hz, 5.0 Hz), 3.04 (td, 1H,  $\text{NCH}_a\text{H}_b$ ,  $J$  12.5 Hz, 4.5 Hz), 2.85 (ddd, 1H,  $\text{NCH}_2\text{CH}_a\text{H}_b$ ,  $J$  15.5 Hz, 11.5 Hz, 5.0 Hz), 2.76 (dd, 1H,  $\text{NCH}_2\text{CH}_a\text{H}_b$ ,  $J$  15.5 Hz, 5.0 Hz), 2.61 (dd, 1H,  $\text{OCCH}_a\text{H}_b$ ,  $J$  17.0 Hz, 5.0 Hz), 2.44 (ddd, 1H,  $\text{OCCH}_a\text{H}_b$ ,  $J$  18.0 Hz, 10.5 Hz, 7.0 Hz), 2.32 (m, 1H,  $\text{OCCH}_2\text{CH}_2\text{CH}_a\text{H}_b$ ), 2.09-1.84 (m, 3H,  $\text{OCCH}_2\text{CH}_2\text{CH}_a\text{H}_b$ ,  $\text{OCCH}_2\text{CH}_a\text{H}_b$ ), 1.70 (s, 3H,  $\text{NCCH}_3$ );  **$^{13}\text{C NMR}$**  ( $\text{CDCl}_3$ , 100 MHz)  $\delta_C$  169.3 (C=O), 138.5 (ArC<sub>quat</sub>), 136.1 (ArC<sub>quat</sub>), 126.7 (ArC<sub>quat</sub>), 122.0 (ArCH), 119.7 (ArCH), 118.4 (ArCH), 110.9 (ArCH), 108.0 (ArC<sub>quat</sub>), 56.7 (NCCH<sub>3</sub>), 36.5 (NCH<sub>2</sub>), 35.5 (OCCH<sub>2</sub>CH<sub>2</sub>CH<sub>2</sub>), 32.1 (OCCH<sub>2</sub>), 26.0 (CCH<sub>3</sub>), 21.3 (NCH<sub>2</sub>CH<sub>2</sub>), 16.8 (OCCH<sub>2</sub>CH<sub>2</sub>);  **$m/z$**  (ES+) 277 ( $[\text{M}+\text{Na}]^+$ , 100%), **HRMS** (ES+) exact mass calculated for  $[\text{M}+\text{Na}]^+$  ( $\text{C}_{16}\text{H}_{18}\text{N}_2\text{NaO}^+$ ) requires  $m/z$  277.1311 & 278.1345, found  $m/z$  277.1306 & 278.1335.

### 2.11.2. Preparation and Characterisation of 10b

#### (R)-11-bromo-12b-methyl-2,3,6,7,12,12b-hexahydroindolo[2,3-a]quinolizin-4(1H)-one

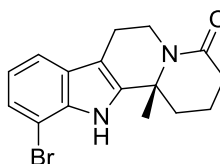

The title compound **10b** was synthesis according to general procedure I as a white solid (99% yield, 93% e.e.). Chiralcel AD, 80:20 Hexane/IPA, 1ml/min, 220, major  $t_R = 5.1$  min, minor  $t_R = 6.6$  min);  $[\alpha]_D^{25} = +164.0$  (c 0.15,  $\text{CH}_2\text{Cl}_2$ )

**Racemic-10b** was synthesised according to general procedure H as a white solid: Chiralcel AD, 80:20 Hexane/IPA, 1ml/min, 220, major  $t_R = 5.1$  min, minor  $t_R = 6.7$  min);

**m.p.** 130-137 °C; **FT-IR**  $\nu_{\text{max}}$  3190 (N–H), 1606 (C=O);  **$^1\text{H NMR}$**  ( $\text{CDCl}_3$ , 400 MHz)  $\delta_H$  8.09 (br s, 1H, ArNH), 7.44 (d, 1H, ArCH,  $J$  8.0 Hz), 7.33 (d, 1H, ArCH,  $J$  8.0 Hz), 7.01 (t, 1H, ArCH,  $J$  8.0 Hz), 5.12 (dd, 1H,  $\text{NCH}_a\text{H}_b$ ,  $J$  13.0 Hz, 4.5 Hz), 3.01 (td, 1H,  $\text{NCH}_a\text{H}_b$ ,  $J$  12.5 Hz, 4.5 Hz), 2.83 (ddd, 1H,  $\text{NCH}_2\text{CH}_a\text{H}_b$ ,  $J$  15.5 Hz, 12.0 Hz, 5 Hz), 2.71 (dd, 1H,  $\text{NH}_2\text{CH}_a\text{H}_b$ ,  $J$  15.0 Hz, 4.0 Hz),

2.60 (br d, 1H, OCCH<sub>a</sub>H<sub>b</sub>, *J* 17.0 Hz), 2.50-2.33 (m, 2H, OCCH<sub>a</sub>H<sub>b</sub>, OCCH<sub>2</sub>CH<sub>2</sub>CH<sub>a</sub>H<sub>b</sub>), 2.10-1.85 (m, 3H, OCCH<sub>2</sub>CH<sub>2</sub>CH<sub>a</sub>H<sub>b</sub>, OCCH<sub>2</sub>CH<sub>a</sub>H<sub>b</sub>), 1.71 (s, 3H, NCCH<sub>3</sub>); <sup>13</sup>C NMR (CDCl<sub>3</sub>, 100 MHz) δ<sub>c</sub> 169.2 (C=O), 139.2 (ArC<sub>quat</sub>), 134.7 (ArC<sub>quat</sub>), 128.0 (ArC<sub>quat</sub>), 124.5 (ArCH), 121.0 (ArCH), 117.7 (ArCH), 109.6 (ArC<sub>quat</sub>), 104.5 (ArC<sub>quat</sub>), 56.7 (NCCH<sub>3</sub>), 36.2 (NCH<sub>2</sub>), 35.5 (OCCH<sub>2</sub>CH<sub>2</sub>CH<sub>2</sub>), 32.1 (NCH<sub>2</sub>CH<sub>2</sub>), 26.0 (NCCH<sub>3</sub>), 21.4 (OCCH<sub>2</sub>), 16.7 (OCCH<sub>2</sub>CH<sub>2</sub>); *m/z* (ES+) 355 ([M+Na]<sup>+</sup>, 100%), HRMS (ES+) exact mass calculated for [M+Na]<sup>+</sup> (C<sub>16</sub>H<sub>17</sub>BrN<sub>2</sub>NaO<sup>+</sup>) requires *m/z* 355.0416 & 357.0397, found *m/z* 355.0409 & 357.0392.

---

### 2.11.3. Preparation and Characterisation of 10c

#### (*R*)-11,12b-dimethyl-2,3,6,7,12,12b-hexahydroindolo[2,3-*a*]quinolizin-4(1*H*)-one

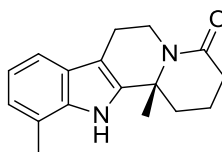

The title compound **10c** was synthesis according to general procedure **I** as white solid (90% yield, 90% e.e.). Chiralcel AD, 80:20 Hexane/IPA, 1ml/min, 220, major *t<sub>R</sub>* = 4.4 min, minor *t<sub>R</sub>* = 5.4 min); [α]<sub>D</sub><sup>25</sup> = +167.6 (c 0.34, CH<sub>2</sub>Cl<sub>2</sub>).

**Racemic-10c** was synthesised according to general procedure **H** as a white solid.

**m.p.** 140-145 °C (decomposition); **FT-IR** *v*<sub>max</sub> 3265 (N–H), 1605 (C=O); <sup>1</sup>H NMR (CDCl<sub>3</sub>, 400 MHz) δ<sub>H</sub> 8.05 (br s, 1H, ArNH), 7.36 (d, 1H, ArCH, *J* 7.5 Hz), 7.06 (t, 1H, ArCH, *J* 7.5 Hz), 7.00 (d, 1H, ArCH, *J* 7.5 Hz), 5.12 (dd, 1H, NCH<sub>a</sub>H<sub>b</sub>, *J* 12.5 Hz, 4.5 Hz), 3.03 (td, 1H, NCH<sub>a</sub>H<sub>b</sub>, *J* 12.5 Hz, 4.5 Hz), 2.84 (ddd, 1H, NCH<sub>2</sub>CH<sub>a</sub>H<sub>b</sub>, *J* 15 Hz, 11.5 Hz, 4.5 Hz), 2.74 (dd, 1H, NCH<sub>2</sub>CH<sub>a</sub>H<sub>b</sub>, *J* 15.0 Hz, 4.5 Hz), 2.60 (br d, 1H, OCCH<sub>a</sub>H<sub>b</sub>, *J* 17.5 Hz), 2.51 (s, 3H, ArCH<sub>3</sub>), 2.49-2.34 (m, 2H, OCCH<sub>a</sub>H<sub>b</sub>, OCCH<sub>2</sub>CH<sub>2</sub>CH<sub>a</sub>H<sub>b</sub>), 2.09-1.86 (m, 3H, OCCH<sub>2</sub>CH<sub>2</sub>CH<sub>a</sub>H<sub>b</sub>, OCCH<sub>2</sub>CH<sub>a</sub>H<sub>b</sub>), 1.71 (s, 3H, NCCH<sub>3</sub>); <sup>13</sup>C NMR (CDCl<sub>3</sub>, 100 MHz) δ<sub>c</sub> 169.2 (C=O), 138.2 (ArC<sub>quat</sub>), 135.6 (ArC<sub>quat</sub>), 126.3 (ArC<sub>quat</sub>), 122.8 (ArCH), 120.2 (ArC<sub>quat</sub>), 120.0 (ArCH), 116.1 (ArCH), 108.7 (ArC<sub>quat</sub>), 56.8 (NCCH<sub>3</sub>), 36.4 (NCH<sub>2</sub>), 35.6 (OCCH<sub>2</sub>CH<sub>2</sub>CH<sub>2</sub>), 32.1 (OCCH<sub>2</sub>), 26.0 (NCCH<sub>3</sub>), 21.3 (NCH<sub>2</sub>CH<sub>2</sub>), 16.79 (ArCH<sub>3</sub>), 16.78 (OCCH<sub>2</sub>CH<sub>2</sub>); *m/z* (ES+) 291 ([M+H]<sup>+</sup>, 100%), HRMS (ES+) exact mass calculated for [M+Na]<sup>+</sup> (C<sub>17</sub>H<sub>20</sub>N<sub>2</sub>NaO<sup>+</sup>) requires *m/z* 291.1468 & 292.1501, found *m/z* 291.1467 & 292.1499.

---

### 2.11.4. Preparation and Characterisation of 10d

#### (*R*)-11-ethyl-12b-methyl-2,3,6,7,12,12b-hexahydroindolo[2,3-*a*]quinolizin-4(1*H*)-one

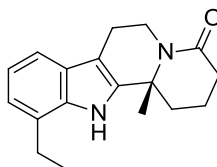

The title compound **10d** was synthesis according to general procedure **I** white solid (60% yield, 86% e.e.). Chiralcel AD, 80:20 Hexane/IPA, 1ml/min, 220, major  $t_R = 4.1$  min, minor  $t_R = 4.9$  min);  $[\alpha]_D^{25} = +120.6$  (c 0.34,  $\text{CH}_2\text{Cl}_2$ )

**Racemic-10d** was synthesised according to general procedure **H** as a white solid.

**m.p.** 127-129 °C; **FT-IR**  $\nu_{\text{max}}$  3277 (N-H), 1605 (C=O);  **$^1\text{H NMR}$**  ( $\text{CDCl}_3$ , 400 MHz)  $\delta_{\text{H}}$  8.00 (br s, 1H, ArNH), 7.37 (d, 1H, ArCH,  $J$  7.5 Hz), 7.10 (t, 1H, ArCH,  $J$  7.5 Hz), 7.05 (d, 1H, ArCH,  $J$  7.5 Hz), 5.12 (dd, 1H,  $\text{NCH}_a\text{H}_b$ ,  $J$  13.0 Hz, 4.5 Hz), 3.03 (td, 1H,  $\text{NCH}_a\text{H}_b$ ,  $J$  12.5 Hz, 4.5 Hz), 2.88 (q, 2H,  $\text{ArCH}_2\text{CH}_3$ ,  $J$  7.5 Hz), 2.84 (td, 1H,  $\text{NCH}_2\text{CH}_a\text{H}_b$ ,  $J$  12.0 Hz, 5.0 Hz), 2.74 (dd, 1H,  $\text{NCH}_2\text{CH}_a\text{H}_b$ ,  $J$  15.0 Hz, 4.0 Hz), 2.60 (br d, 1H,  $\text{OCCH}_a\text{H}_b$ ,  $J$  17.0 Hz), 2.49-2.31 (m, 2H,  $\text{OCCH}_a\text{H}_b$ ,  $\text{OCCH}_2\text{CH}_2\text{CH}_a\text{H}_b$ ), 2.08-1.85 (m, 3H,  $\text{OCCH}_2\text{CH}_2\text{CH}_a\text{H}_b$ ,  $\text{OCCH}_2\text{CH}_a\text{H}_b$ ), 1.71 (s, 3H,  $\text{NCCH}_3$ ), 1.38 (t, 3H,  $\text{ArCH}_2\text{CH}_3$ ,  $J$  7.5 Hz);  **$^{13}\text{C NMR}$**  ( $\text{CDCl}_3$ , 100 MHz)  $\delta_{\text{C}}$  169.2 ( $\text{CO}$ ), 138.1 ( $\text{ArC}_{\text{quat}}$ ), 134.8 ( $\text{ArC}_{\text{quat}}$ ), 126.5 ( $\text{ArC}_{\text{quat}}$ ), 126.4 ( $\text{ArC}_{\text{quat}}$ ), 120.7 ( $\text{ArCH}$ ), 120.1 ( $\text{ArCH}$ ), 116.2 ( $\text{ArCH}$ ), 108.7 ( $\text{ArC}_{\text{quat}}$ ), 56.7 ( $\text{NCCH}_3$ ), 36.4 ( $\text{NCH}_2$ ), 35.6 ( $\text{OCH}_2\text{CH}_2\text{CH}_2$ ), 32.1 ( $\text{OCCH}_2$ ), 26.0 ( $\text{NCCH}_3$ ), 24.0 ( $\text{ArCH}_2\text{CH}_3$ ), 21.3 ( $\text{NCH}_2\text{CH}_2$ ), 16.8 ( $\text{OCCH}_2\text{CH}_2$ ), 13.9 ( $\text{ArCH}_2\text{CH}_3$ );  **$m/z$**  (ES+) 305 ( $[\text{M}+\text{Na}]^+$ , 100%), **HRMS** (ES+) exact mass calculated for  $[\text{M}+\text{Na}]^+$  ( $\text{C}_{18}\text{H}_{22}\text{N}_2\text{NaO}^+$ ) requires  $m/z$  305.1624 & 306.1658, found  $m/z$  305.1626 & 306.1661.

## 2.12. Optimization, Derivative for X-ray and Control reactions.

## 2.13. Preparation and characterisation of 14

### *N*-[2-(1H-indole-3-yl)ethyl]-3-oxobutane-1-sulfonamide

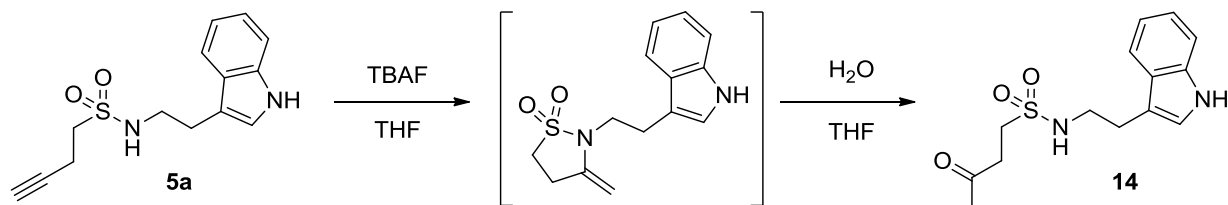

To a stirred solution of sulfonamide **5a** (500 mg, 1.81 mmol) in dry THF (20 ml), a solution of TBAF (9.1 ml, 1M in THF) was added under nitrogen and heated to reflux for 13 hours. The reaction was monitored by  $^1\text{H NMR}$  ( $\text{CDCl}_3$  passed through a short pad of  $\text{K}_2\text{CO}_3$  prior to use). Upon completion, water (20 ml) was added and the solution was stirred for 1 h. The aqueous layer was separated and the organic layer was washed with water 5 times. Purification by flash column chromatography (silica) afforded **14** (230 mg, 25%)

**m.p.** 108-109 °C; **FT-IR**  $\nu_{\max}$  3346 (ArN–H, broad), 3252 (SN–H) 1707 (C=O) 1313 (S=O<sub>(as)</sub>), 1138 (S=O<sub>(sy)</sub>); **<sup>1</sup>H NMR** (CDCl<sub>3</sub>, 500 MHz)  $\delta_{\text{H}}$  8.12 (br s, 1H, ArNH), 7.60 (d, 1H, ArCH, *J* 7.6 Hz), 7.39 (d, 1H, ArCH, *J* 8.2 Hz), 7.23 (t, 1H, ArCH, *J* 7.6 Hz), 7.15 (t, 1H, ArCH, *J* 7.9 Hz), 7.09 (s, 1H, ArCH), 4.26 (br s, 1H, SNH), 3.45 (q, 2H, SNCH<sub>2</sub>, *J* 6.0 Hz), 3.19 (t, 2H, SCH<sub>2</sub>, *J* 7.3 Hz), 3.05 (t, 2H, ArCH<sub>2</sub>, *J* 6.0), 2.77 (t, 2H, SCH<sub>2</sub>CH<sub>2</sub>, *J* 7.1 Hz), 2.11 (s, 3H, COCH<sub>3</sub>); **<sup>13</sup>C NMR** (CDCl<sub>3</sub>, 125 MHz)  $\delta_{\text{C}}$  204.5 (CO) 136.5 (ArC quat), 127.0 (ArC quat), 122.8 (ArCH), 122.5 (ArCH), 119.8 (ArCH), 118.6 (ArCH), 111.7 (ArCCH<sub>2</sub>), 111.5 (ArCH), 46.7 (SCH<sub>2</sub>), 43.3 (SNCH<sub>2</sub>), 37.3 (SCH<sub>2</sub>CH<sub>2</sub>), 29.9 (COCH<sub>3</sub>), 26.2 (ArCH<sub>2</sub>); ***m/z*** (ES+) 317 ([M+Na]<sup>+</sup>, 100%), **HRMS** (ES+) exact mass calculated for [M+Na]<sup>+</sup> (C<sub>14</sub>H<sub>18</sub>N<sub>2</sub>NaO<sub>3</sub>S<sup>+</sup>) requires *m/z* 317.0930, found *m/z* 317.0927.

---

### 2.13.1. Mechanistic evidence for *N*-sulfonylimminium 13

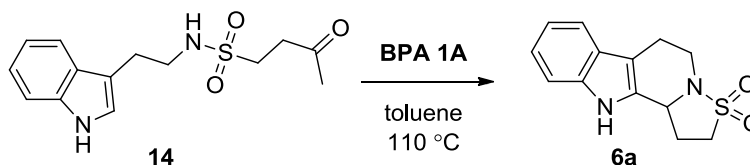

To a flask containing ketone **14** (0.1 mmol, 1 eq), and **BPA-1A** (0.01 mmol, 0.1 eq) under nitrogen atmosphere was added toluene at 90 °C rapidly *via* canula. The reaction mixture was stirred at reflux for 1 hour then cooled to room temperature. Concentration *in vacuo* and purification by flash column chromatography furnished the title compound (99 % yield, 92 % e.e.).

---

### 2.13.2. General Procedure for optimization in the preparation of 11b-methyl-1,2,5,6,11,11b-hexahydroisothiazolo[2',3':1,2]pyrido[3,4-b]indole 3,3-dioxide **5a**.

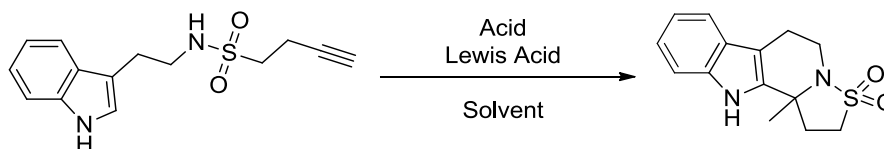

To an aluminium foil covered flask alkyne **5a** (0.15 mmol, 1eq) and **BPA-1A** (0.015 mmol, 0.1 eq) were dissolved in solvent (21 ml/0.15 mmol of alkyne **5a**) under nitrogen the mixture was then heated to the desired temperature and the Lewis acid was added in DCM (1 ml). The reaction mixture was then stirred at the desired temperature until the reaction reached completion (monitoring by TLC and <sup>1</sup>HNMR). The reaction mixture was concentrated *in vacuo* and purified by FCC.

---

### 2.13.3. General procedure for optimization in the preparation of **10a**.

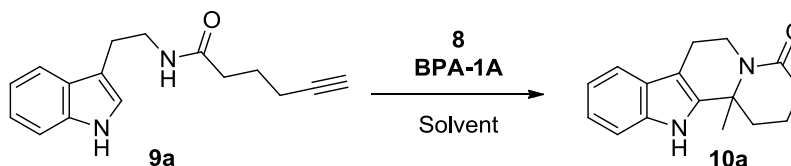

To an aluminium foil covered flask [Au(o-biphenyl)PtBu<sub>2</sub>](MeCN)]SbF<sub>6</sub> (**8**) (0.0015 mmol, 0.01 eq) was added in dichloromethane (1 ml) and the dichloromethane was removed under nitrogen stream. Amide **9** (0.15 mmol, 1 eq) and **BPA-1A** (0.015 mmol, 0.1 eq) were added and were dissolved in toluene (21 ml/0.15 mmol of **9**) under nitrogen. The mixture was then heated to reflux and monitored (by TLC) until the reaction reached completion. The reaction was concentrated *in vacuo* and purified by FCC.

#### 2.13.4. Optimisation table for the preparation of 10a.

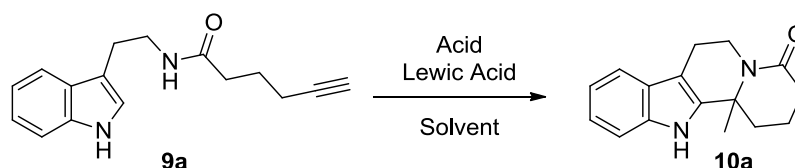

| Entry | Acid ( <b>BPA</b> ) | Acid (mol %) | <b>8</b> (mol %) | Solvent | Temp (°C) | Yield (%) | e.e.(%) |
|-------|---------------------|--------------|------------------|---------|-----------|-----------|---------|
| 1     | <b>1A</b>           | 10           | 5                | toluene | 60        | 47        | 66      |
| 2     | <b>1A</b>           | 10           | 5                | toluene | 110       | 79        | 50      |
| 3     | <b>1A</b>           | 10           | 3                | toluene | 110       | 99        | 62      |
| 4     | <b>1A</b>           | 10           | 1                | toluene | 110       | 86        | 66      |
| 5     | <b>1A</b>           | 10           | 0.5              | toluene | 110       | 81        | 68      |

#### 2.13.5. Preparation and characterisation of 15a

##### 11-(3-bromobenzyl)-11b-methyl-1,2,5,6,11,11b-hexahydro[1,2]thiazolo[2',3':1,2]pyrido[3,4-b]indole 3,3-dioxide

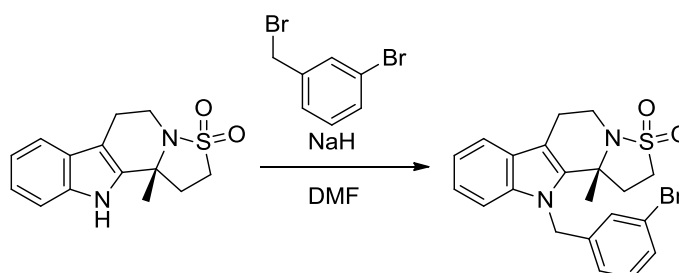

**6a** (0.12 mmol, 1 eq) was dissolved in DMF (1 ml/0.12 mmol of **6a**) under argon and added to a dried flask containing sodium hydride (1.6 mmol, 1.3 eq) in an ice bath. The mixture was stirred at 0°C for 10 mins and then allowed to warm to room temperature stirring for a further 10 mins. 3-bromobenzyl bromide (0.37 mmol, 3 eq) was added to the mixture in one portion and allowed to stir at room temperature for 3 h. The reaction was diluted with water (5 ml/0.12 mmol of **6a**) and extracted with ethyl acetate (3 x 5 ml/0.12 mmol of **6a**). The combined organics were washed with brine, dried over sodium sulfate and concentrated *in vacuo*. Purification by FCC to gave **XX** as a white solid (68% yield). Recrystallization from ether by slow evaporation gave crystals of high enough quality for single crystal x-ray diffraction (<99% e.e.). Chiralcel AD, 80:20 Hexane/IPA, 1ml/min, 220, major *t<sub>R</sub>* = 12.0 min, minor *t<sub>R</sub>* = 18.1 min).

**Racemic-15a** was synthesised according to the same procedure as a white solid: Chiralcel AD, 80:20 Hexane/IPA, 1ml/min, 220, major  $t_R$  = 12.0 min, minor  $t_R$  = 18.0 min);

**m.p.** 195-196 °C; **FT-IR**  $\nu_{\max}$  1291 (S=O<sub>(as)</sub>), 1134 (S=O<sub>(sy)</sub>); **<sup>1</sup>H NMR** (CDCl<sub>3</sub>, 500 MHz)  $\delta_H$  7.55 (m, 1H, ArCH), 7.39 (d, 1H, PhCH,  $J$  7.9 Hz), 7.20-7.15 (m, 3H, 2 × ArCH, PhCH,  $J$  8.2 Hz), 7.12 (t, 1H, ArCH,  $J$  7.9 Hz), 7.03 (m, 1H, ArCH), 6.62 (d, 1H, PhCH), 5.43 (d, 1H, NCH<sub>a</sub>H<sub>b</sub>Ph,  $J$  18.0 Hz), 5.38 (d, 1H, NCH<sub>a</sub>H<sub>b</sub>Ph,  $J$  18.0 Hz), 4.08 (dd, 1H, NCH<sub>a</sub>CH<sub>b</sub>CH<sub>2</sub>,  $J$  14.5 Hz, 5.5 Hz), 3.34 (ddd, 1H, NCH<sub>a</sub>H<sub>b</sub>CH<sub>2</sub>,  $J$  14.5 Hz, 12.5 Hz, 4.5 Hz), 3.27-3.15 (m, 2H, SCH<sub>3</sub>H<sub>b</sub>, ArCH<sub>a</sub>H<sub>b</sub>), 3.01 (dt, 1H, SCH<sub>3</sub>H<sub>b</sub>,  $J$  6.0 12.5 Hz, 7.0 Hz), 2.78 (dd, 1H, ArCH<sub>a</sub>H<sub>b</sub>,  $J$  15.5 Hz, 4.0 Hz), 2.64 (m, 1H, SCH<sub>2</sub>CH<sub>a</sub>H<sub>b</sub>), 2.56 (m, 1H, SCH<sub>2</sub>CH<sub>a</sub>H<sub>b</sub>), 1.67 (s, 3H, NCCH<sub>3</sub>); **<sup>13</sup>C NMR** (CDCl<sub>3</sub>, 125 MHz)  $\delta_C$  139.5 (ArC<sub>quat</sub>), 136.9 (ArC<sub>quat</sub>), 135.3 (ArC<sub>quat</sub>), 130.8 (PhCH), 130.6 (PhCH), 128.5 (PhCH), 126.6 (ArC<sub>quat</sub>), 123.9 (PhCH), 123.2 (PhCBr), 123.0 (ArCH), 120.2 (ArCH), 118.9 (ArCH), 109.7 (ArCH), 109.6 (ArC<sub>quat</sub>), 59.6 (NCCH<sub>3</sub>), 47.3 (NCH<sub>2</sub>Ph), 45.4 (SCH<sub>2</sub>), 36.4 (NCH<sub>2</sub>), 32.7 (SCH<sub>2</sub>CH<sub>2</sub>), 27.6 (NCCH<sub>3</sub>), 20.9 (ArCH<sub>2</sub>); **HRMS** (TOF MS FI+) exact mass calculated for [M]<sup>+</sup> (C<sub>21</sub>H<sub>21</sub>BrN<sub>2</sub>O<sub>2</sub>S<sup>+</sup>) requires  $m/z$  444.0507 and 446.0488, found  $m/z$  444.0519 and 446.0502

---

### 3. $^1\text{H}$ NMR and $^{13}\text{C}$ NMR spectra

#### 3.1. Sulfonamide starting material 5

##### 3.1.1. $^1\text{H}$ NMR spectra for *N*-[2-(1*H*-indol-3-yl)ethyl]but-3-yne-1-sulfonamide 5a

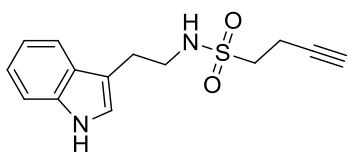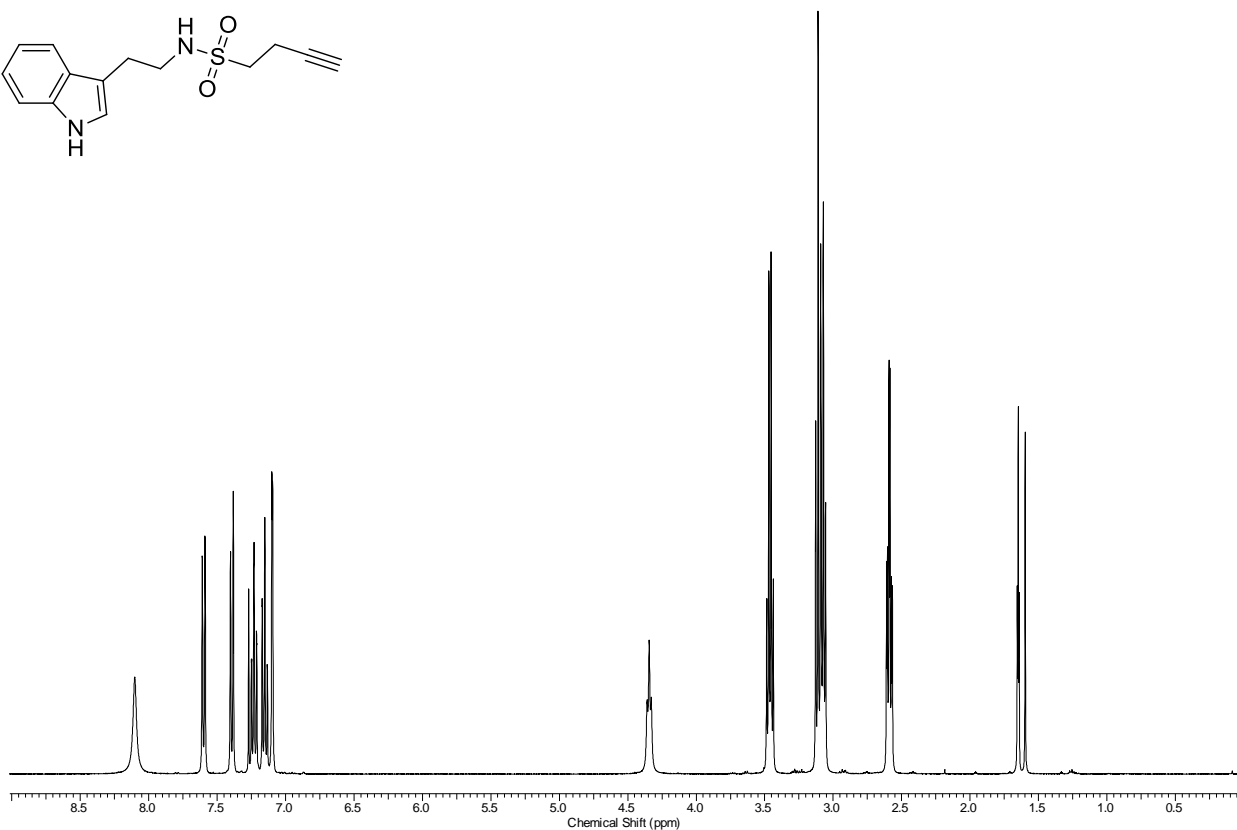

##### 3.1.2. $^{13}\text{C}$ NMR spectra for *N*-[2-(1*H*-indol-3-yl)ethyl]but-3-yne-1-sulfonamide 5a

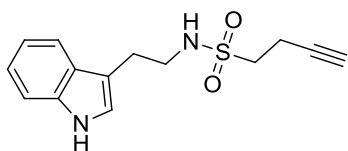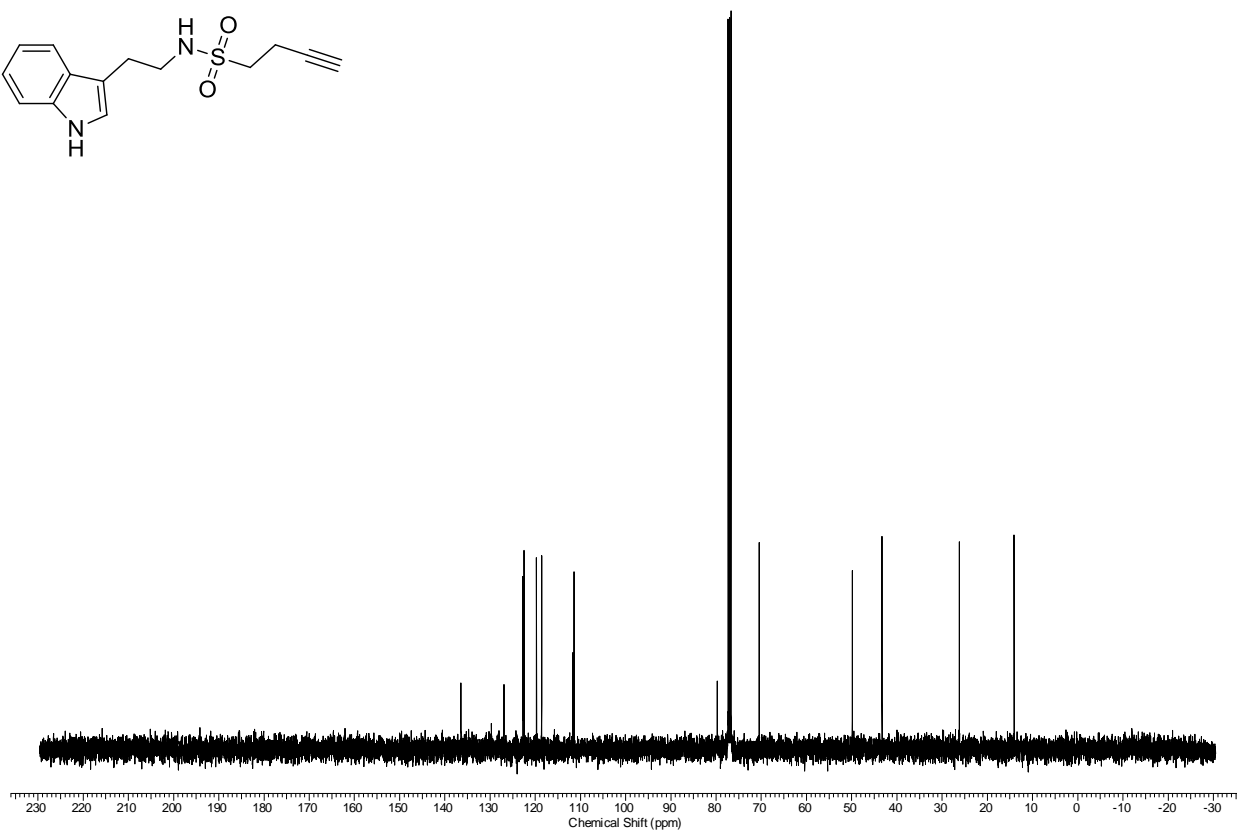



### 3.1.3. <sup>1</sup>H NMR spectra for *N*-[2-(4-chloro-1*H*-indol-3-yl)ethyl]but-3-yn-1-sulfonamide 5b

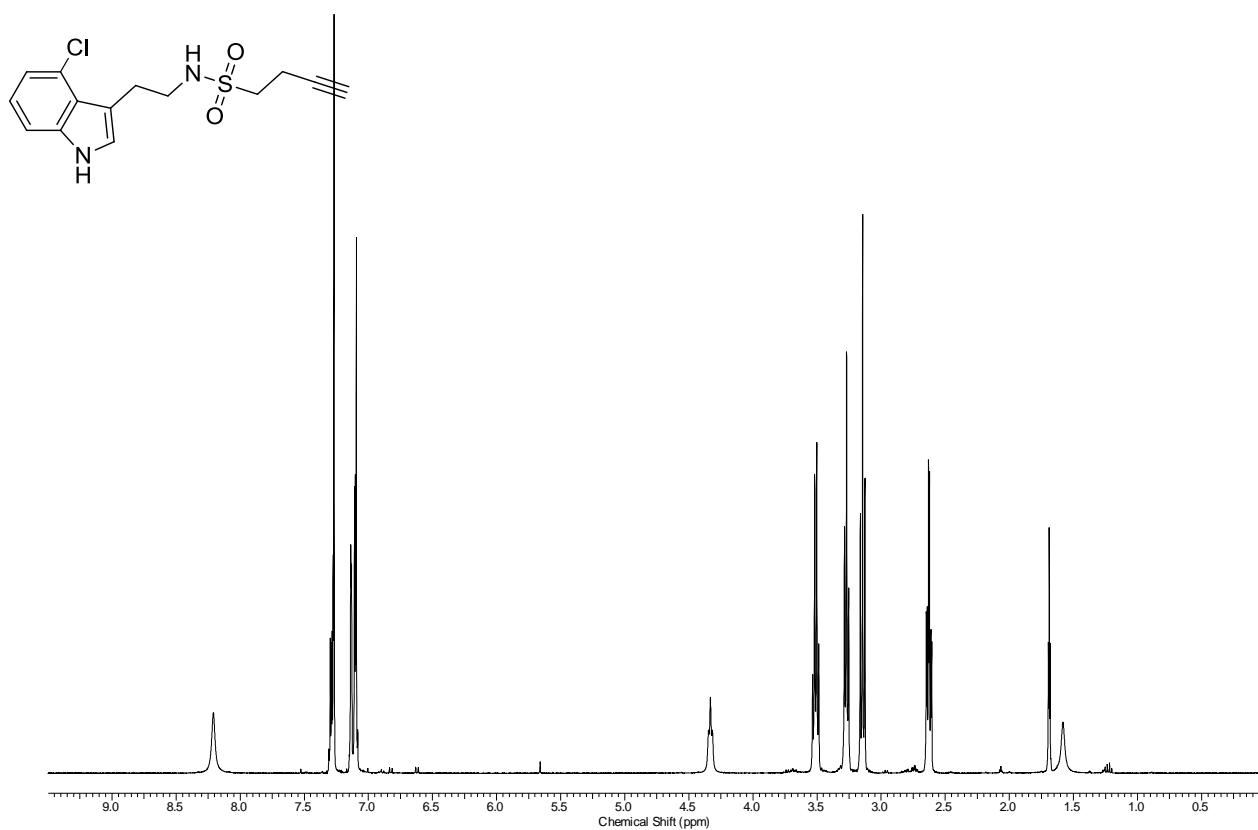

### 3.1.4. <sup>13</sup>C NMR spectra for *N*-[2-(4-chloro-1*H*-indol-3-yl)ethyl]but-3-yn-1-sulfonamide 5b

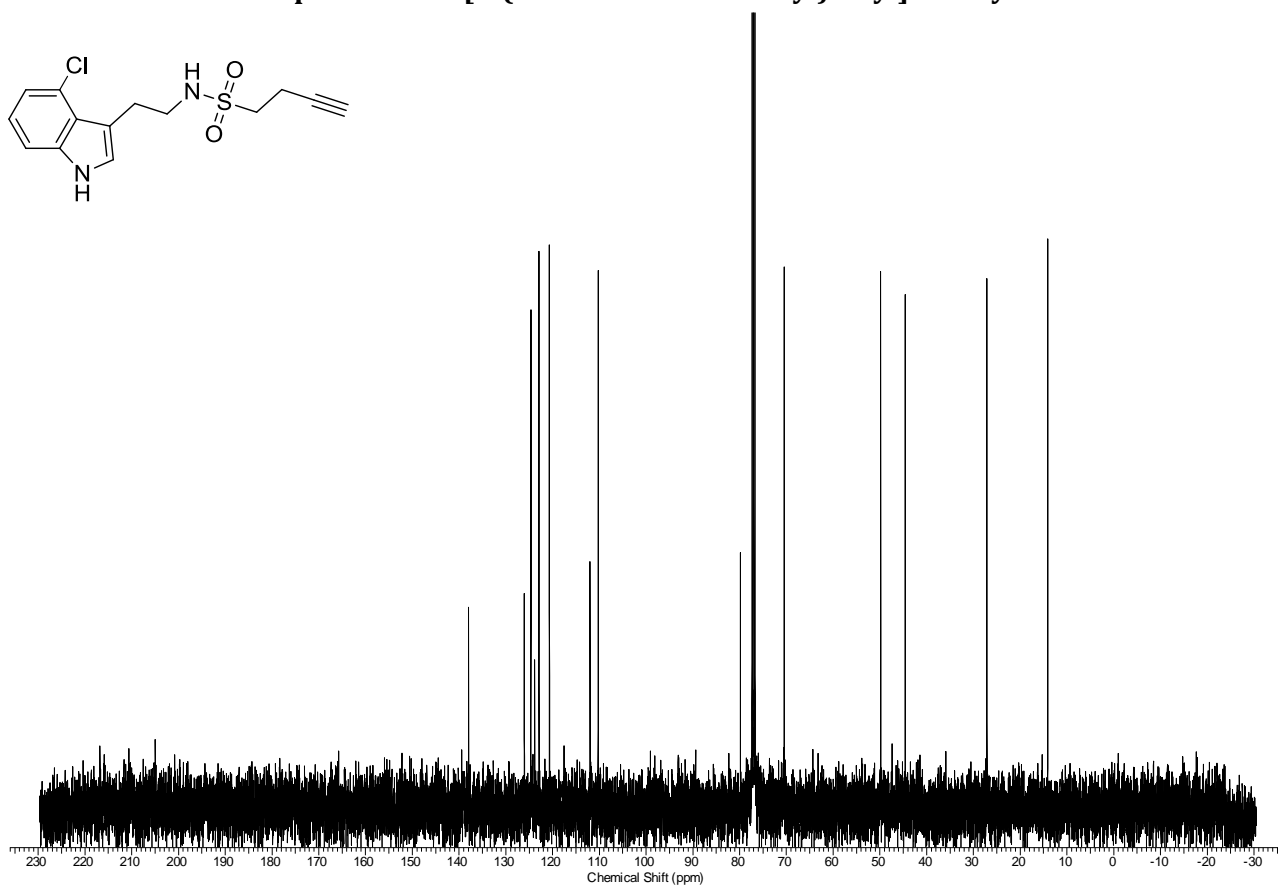

### 3.1.5. <sup>1</sup>H NMR spectra for *N*-[2-(5-bromo-1*H*-indol-3-yl)ethyl]but-3-yn-1-sulfonamide 5c

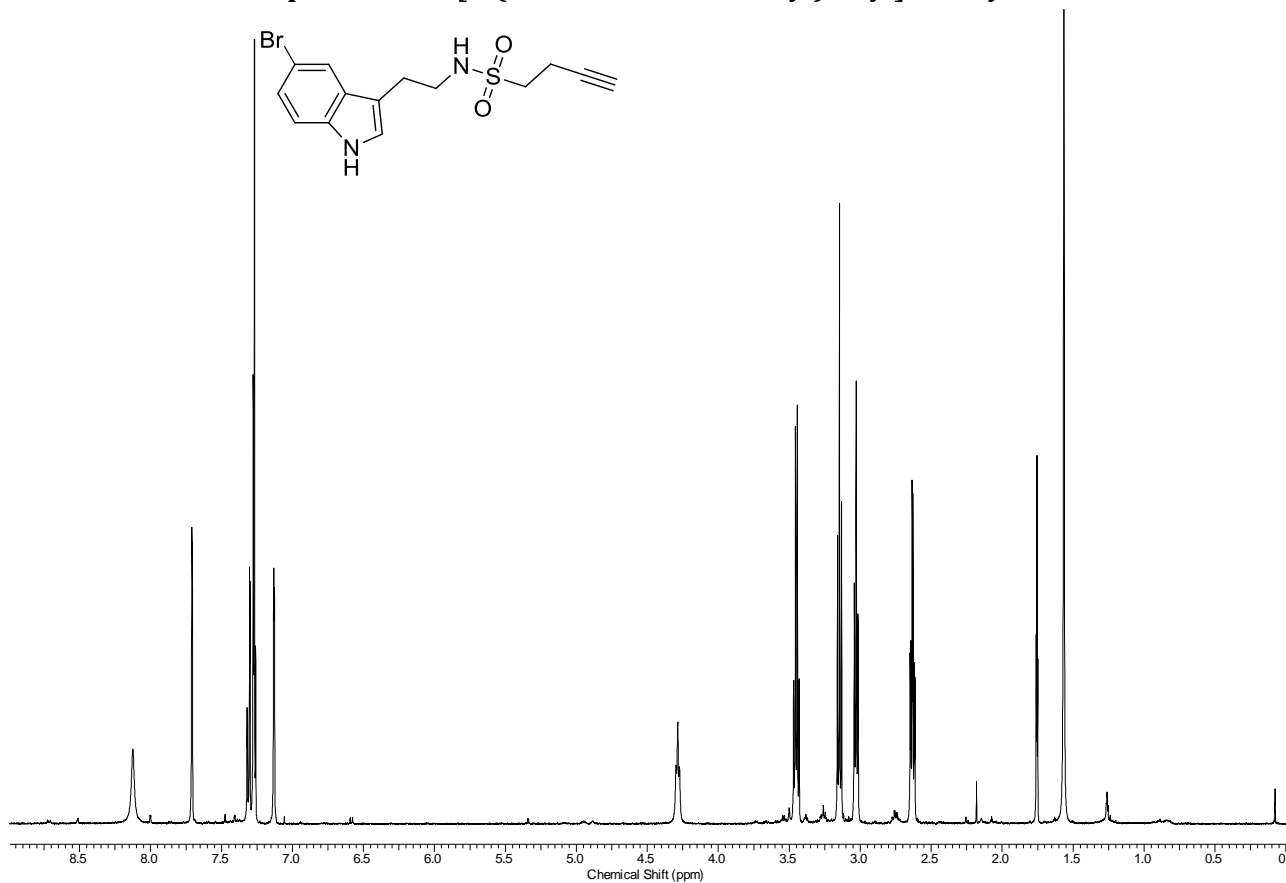

### 3.1.6. <sup>13</sup>C NMR spectra for *N*-[2-(5-bromo-1*H*-indol-3-yl)ethyl]but-3-yn-1-sulfonamide 5c

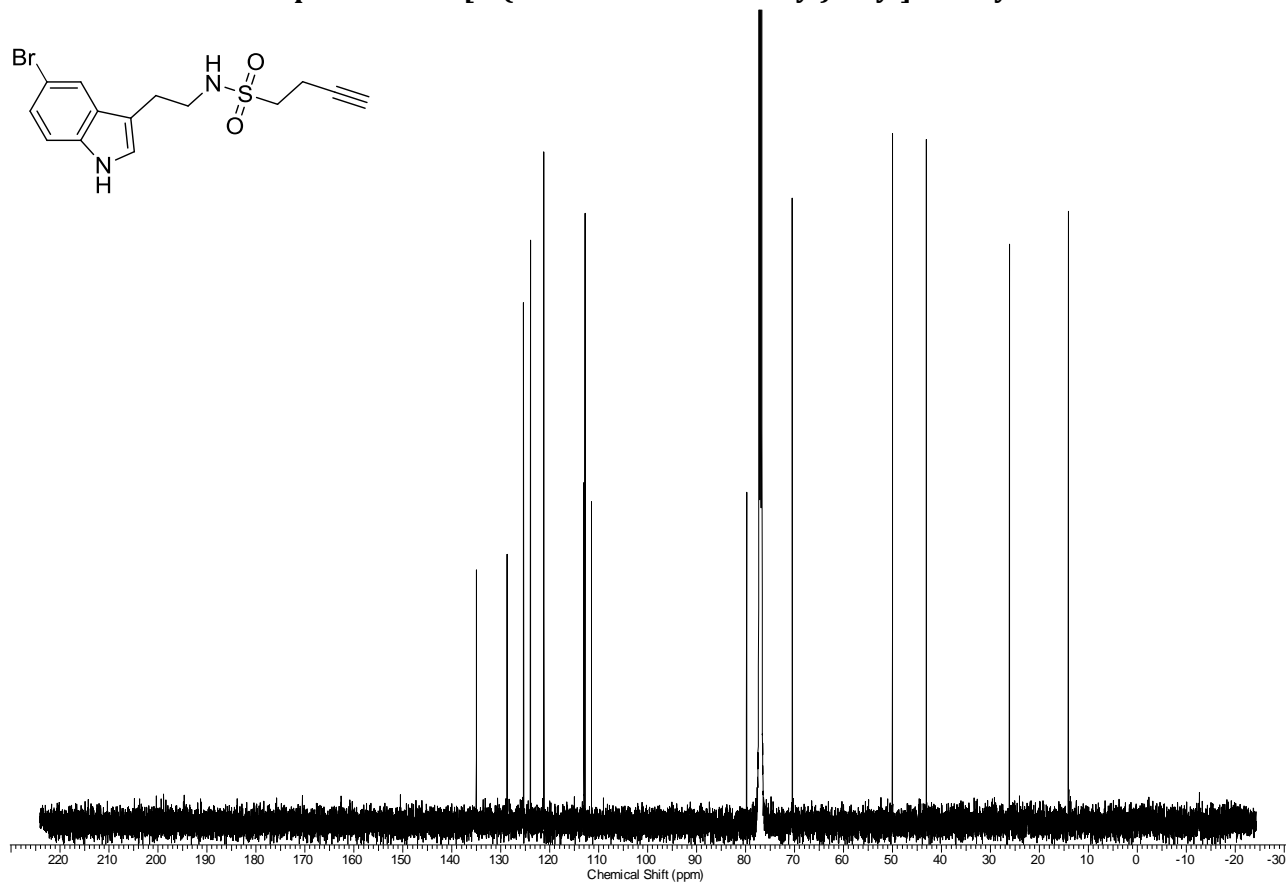

### 3.1.7. <sup>1</sup>H NMR spectra for *N*-[2-(6-bromo-1*H*-indol-3-yl)ethyl]but-3-yn-1-sulfonamide 5d

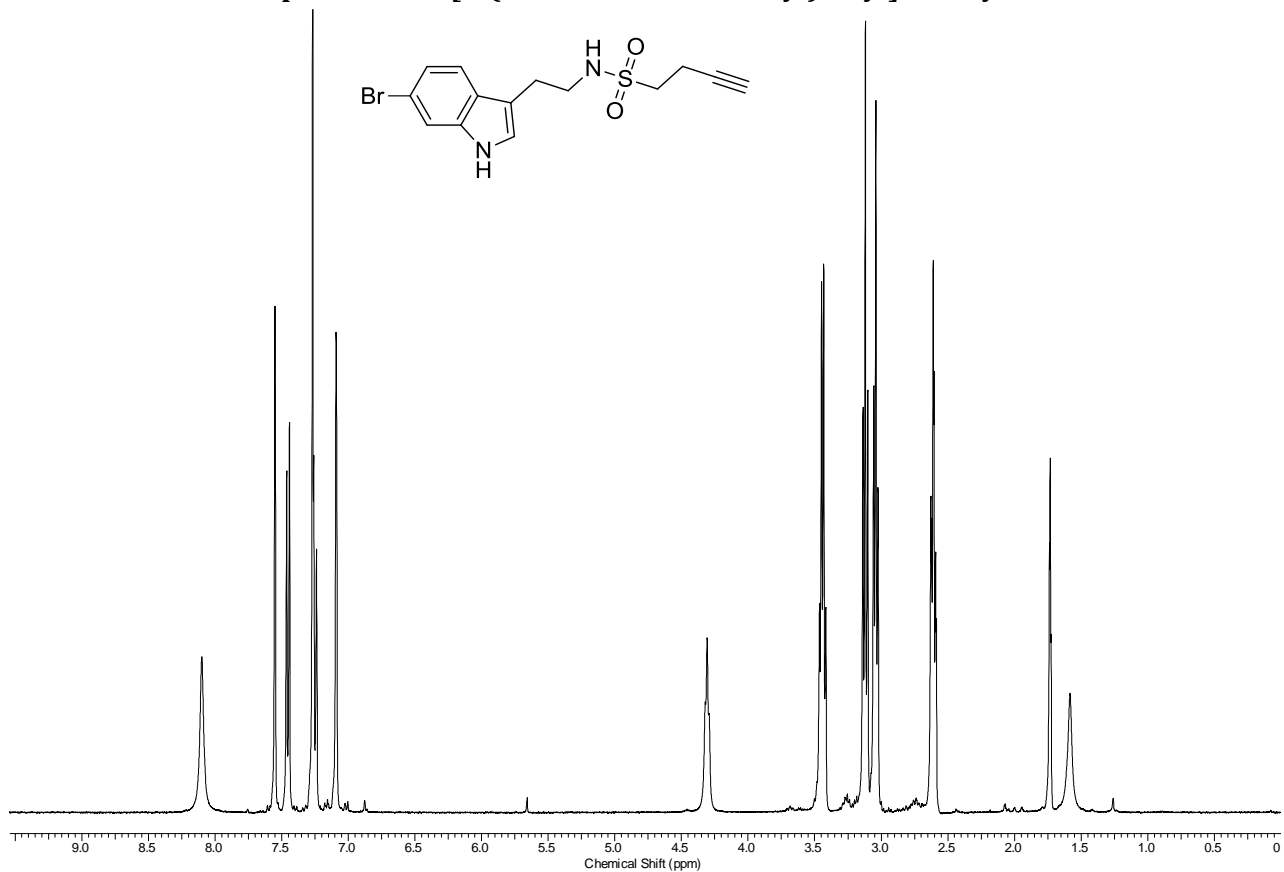

### 3.1.8. <sup>13</sup>C NMR spectra for *N*-[2-(6-bromo-1*H*-indol-3-yl)ethyl]but-3-yn-1-sulfonamide 5d

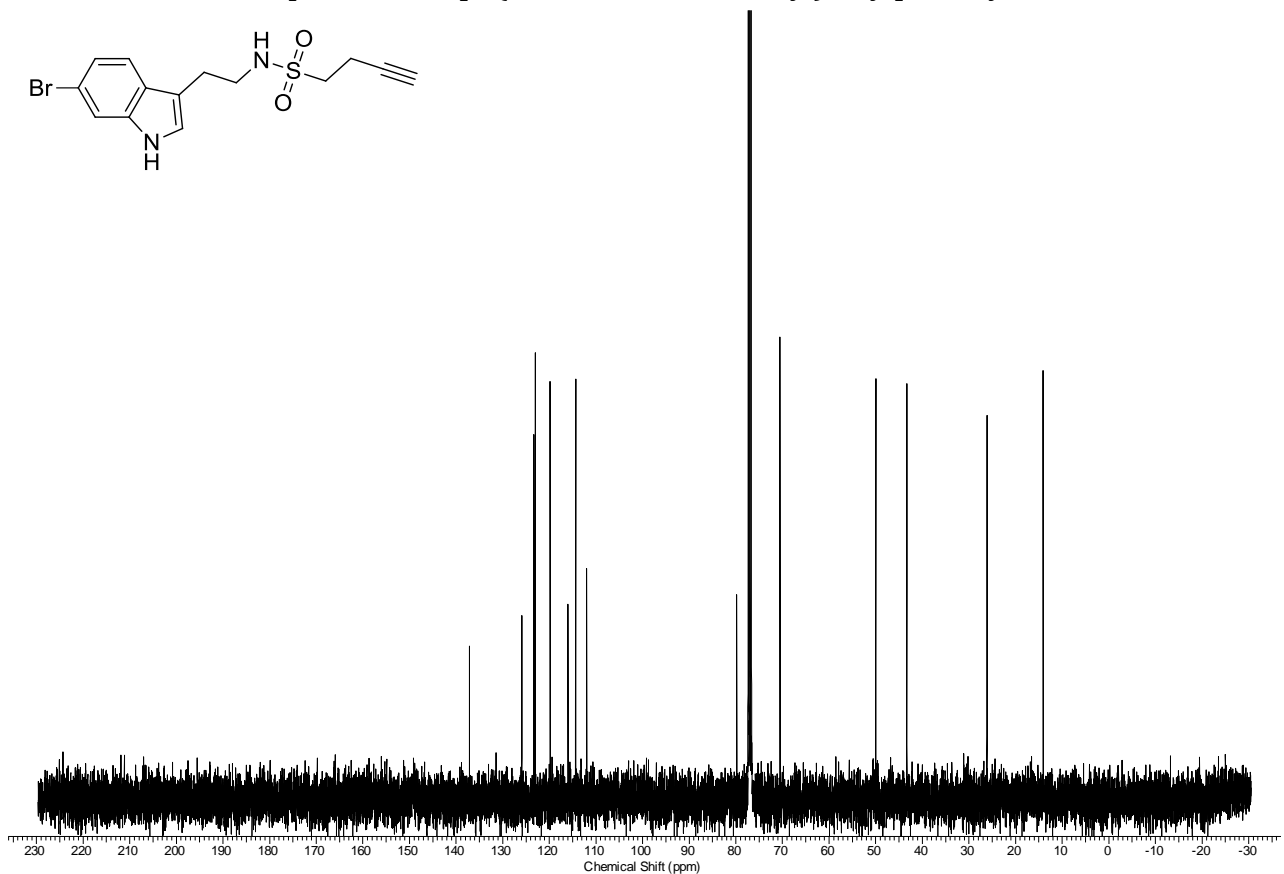

### 3.1.9. <sup>1</sup>H NMR spectra for *N*-[2-(5-fluoro-1*H*-indol-3-yl)ethyl]but-3-yn-1-sulfonamide **5e**

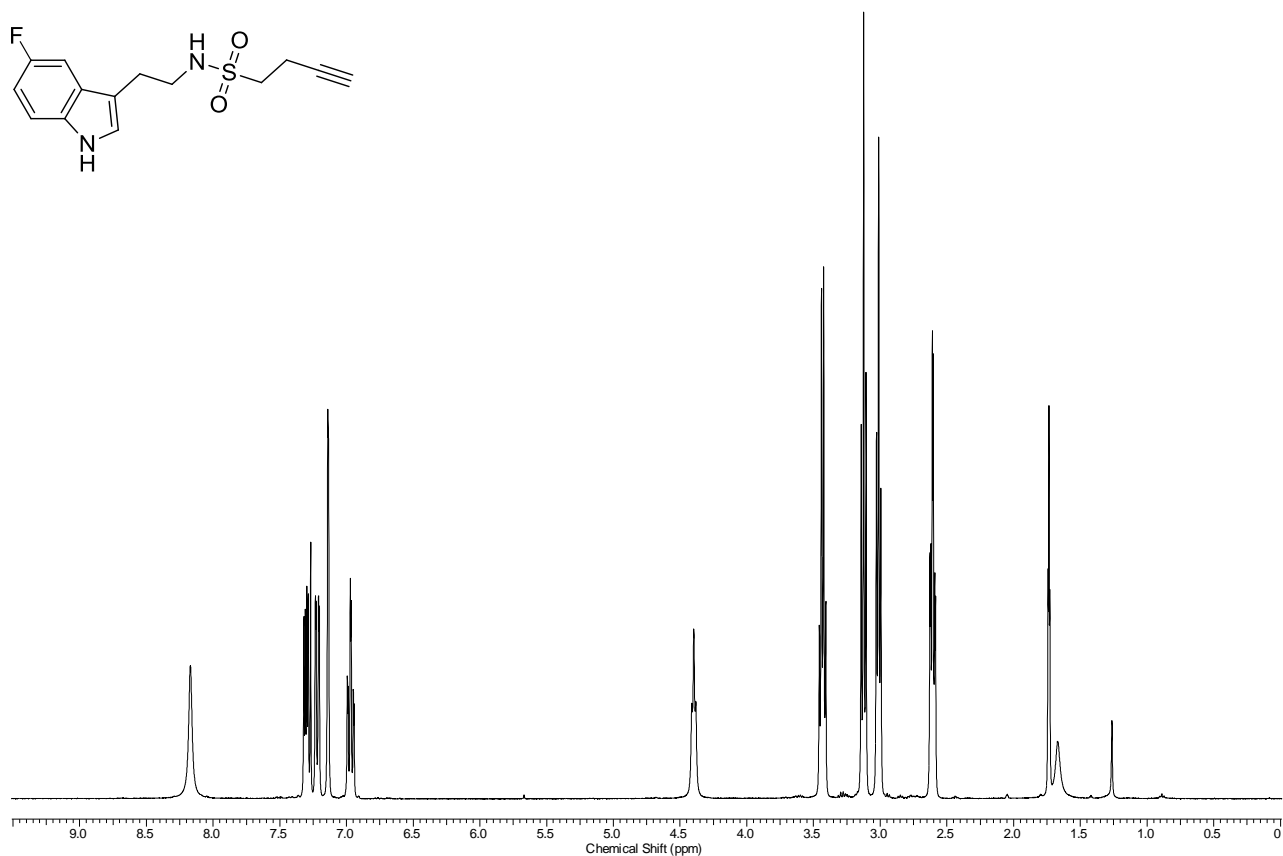

### 3.1.10. <sup>13</sup>C NMR spectra for *N*-[2-(5-fluoro-1*H*-indol-3-yl)ethyl]but-3-yn-1-sulfonamide **5e**

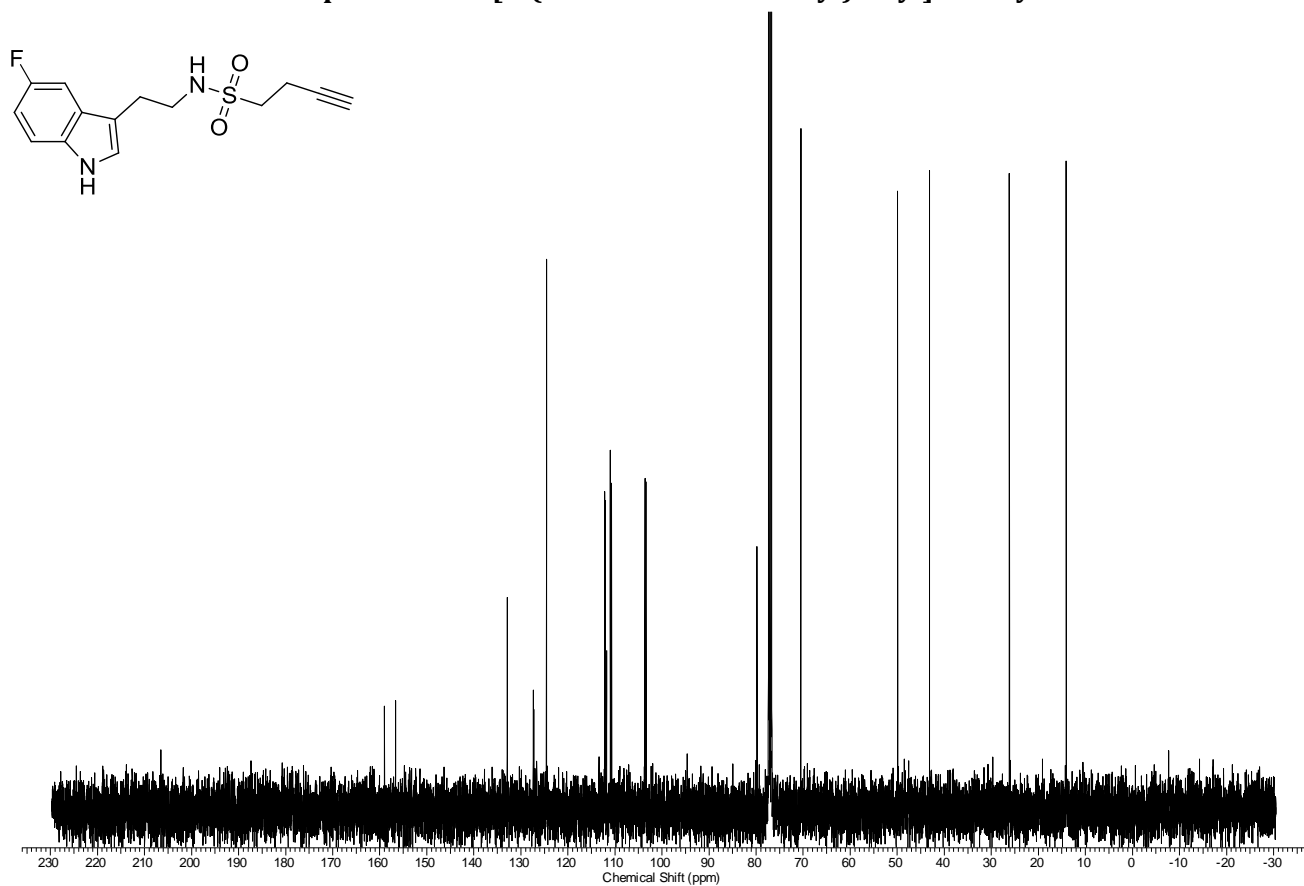

3.1.11. <sup>1</sup>HNMR spectra for *N*-[2-(6-fluoro-1*H*-indol-3-yl)ethyl]but-3-yn-1-sulfonamide **5f**

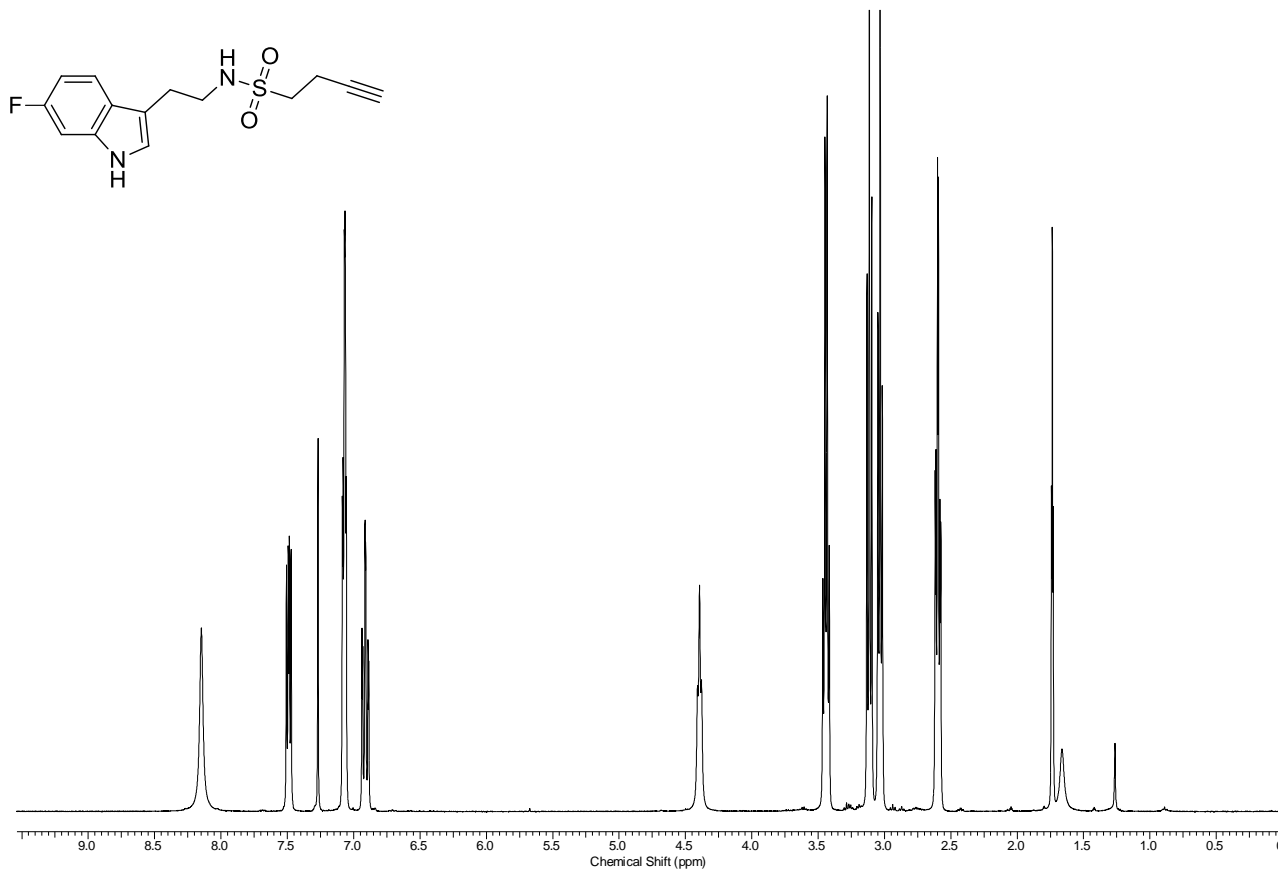

3.1.12. <sup>13</sup>CNMR spectra for *N*-[2-(6-fluoro-1*H*-indol-3-yl)ethyl]but-3-yn-1-sulfonamide **5f**

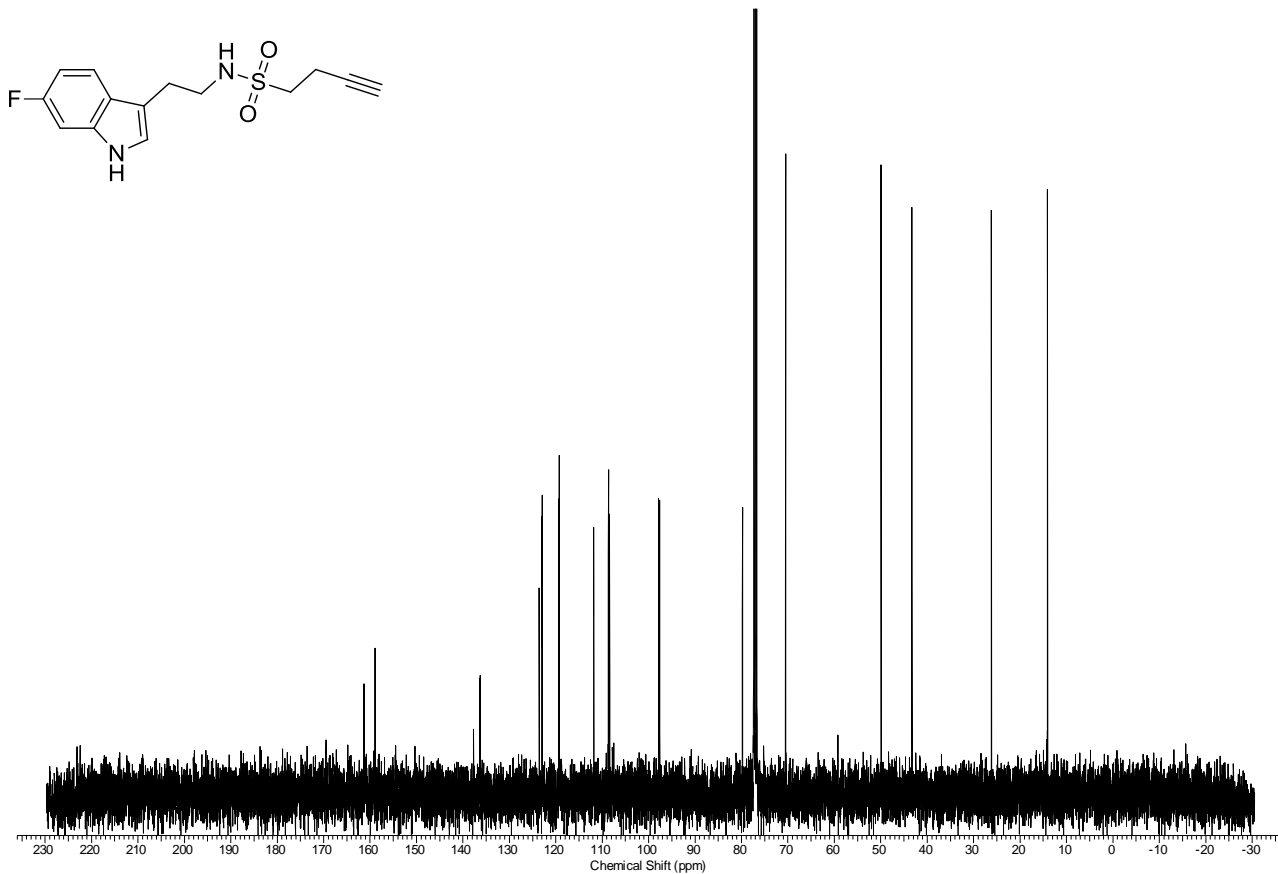

3.1.13. <sup>1</sup>HNMR spectra for *N*-[2-(5-cyano-1*H*-indol-3-yl)ethyl]but-3-yne-1-sulfonamide 5g

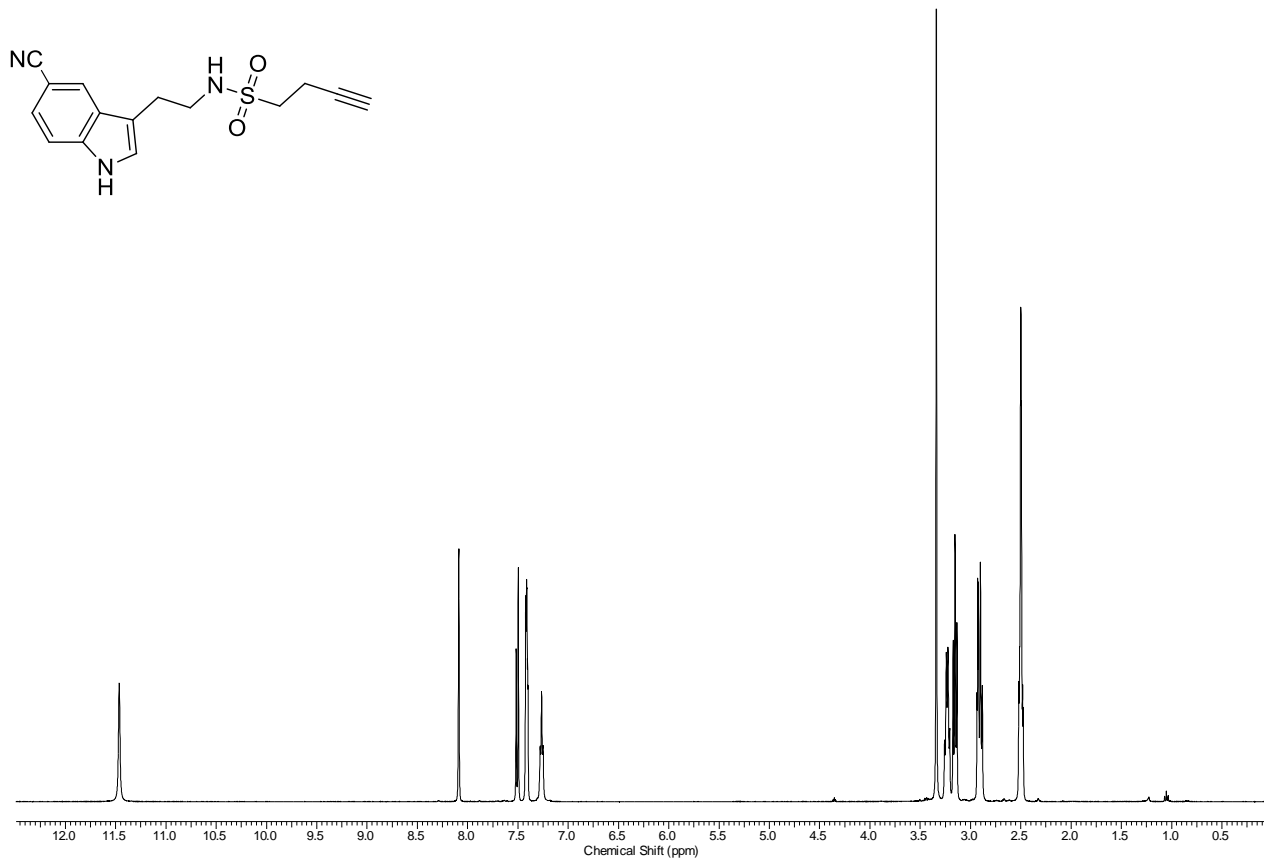

3.1.14. <sup>13</sup>CNMR spectra for *N*-[2-(5-cyano-1*H*-indol-3-yl)ethyl]but-3-yne-1-sulfonamide 5g

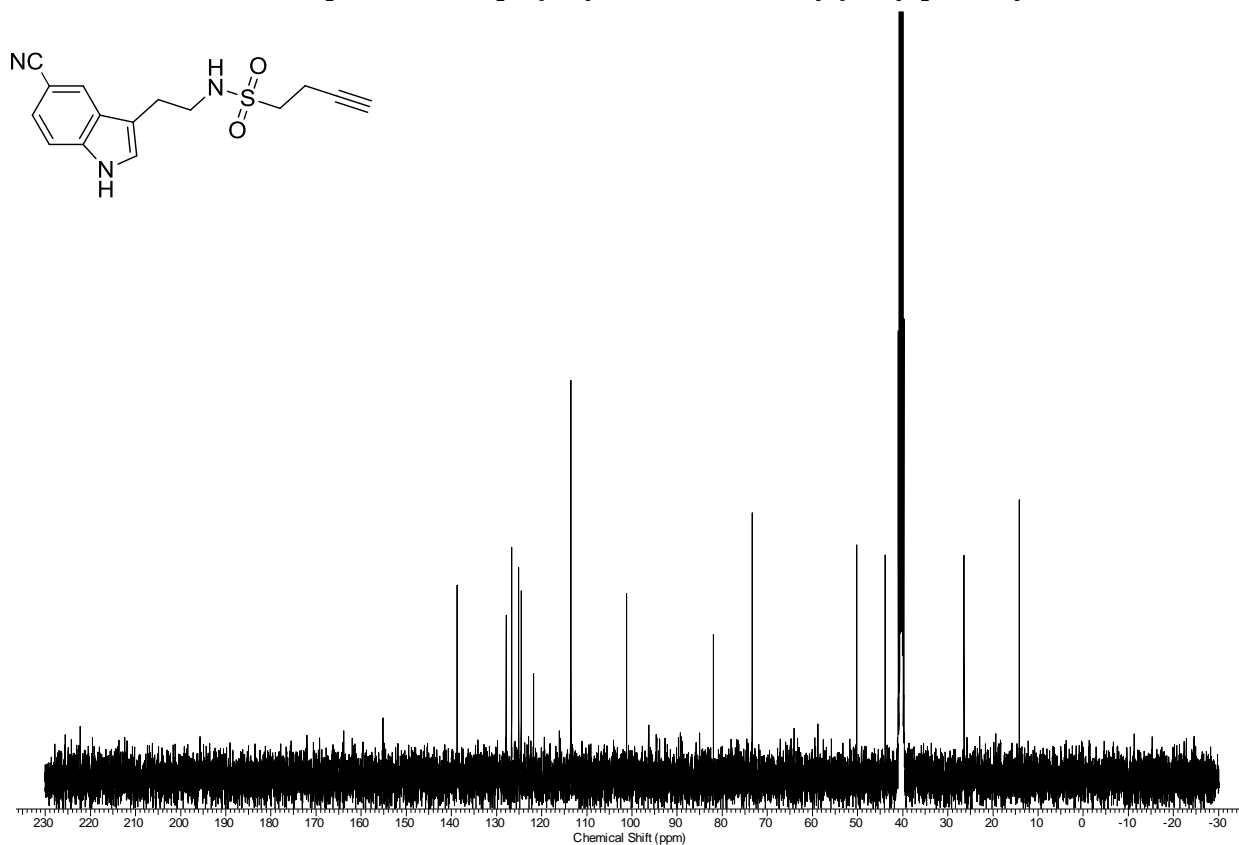

3.1.15. <sup>1</sup>HNMR spectra for N-[2-(5-methoxy-1H-indol-3-yl)ethyl]but-3-yne-1-sulfonamide 5h

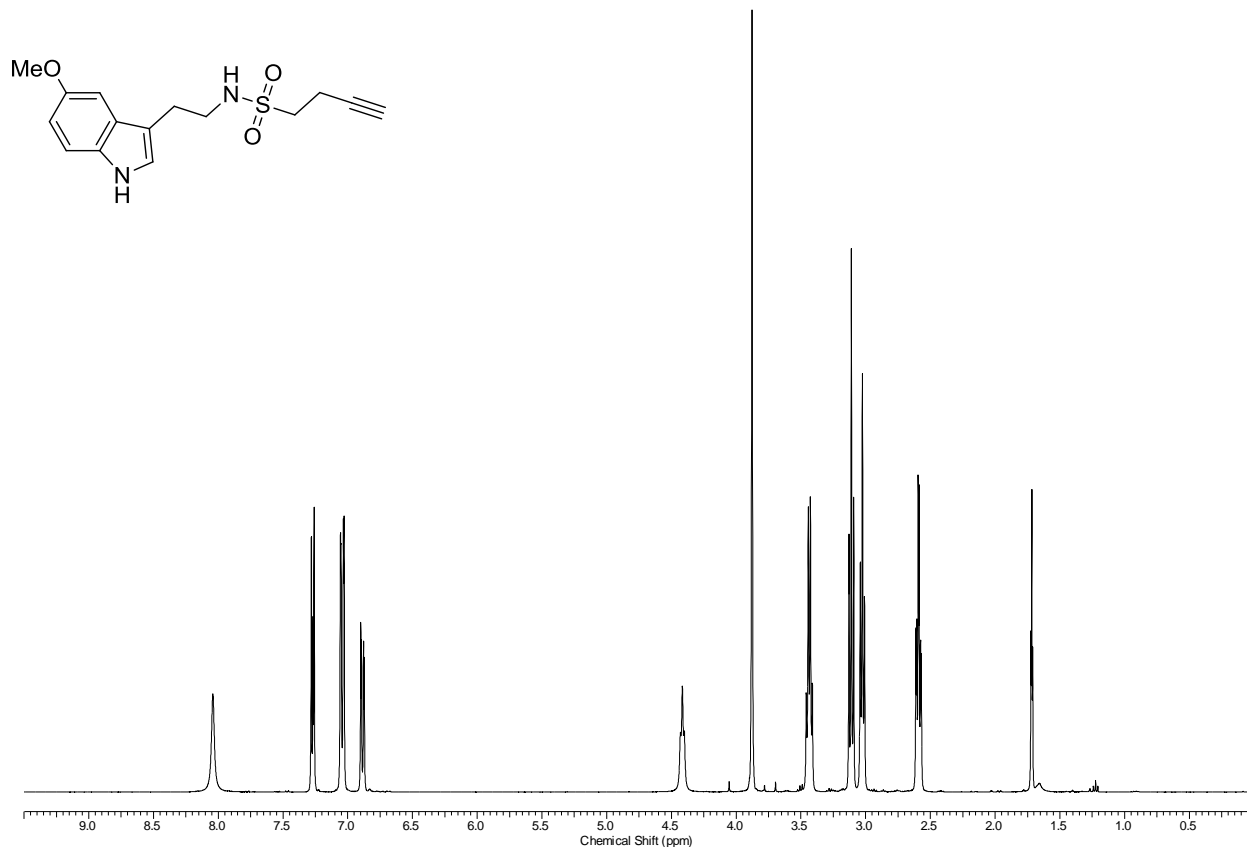

3.1.16. <sup>13</sup>CNMR spectra for N-[2-(5-methoxy-1H-indol-3-yl)ethyl]but-3-yne-1-sulfonamide 5h

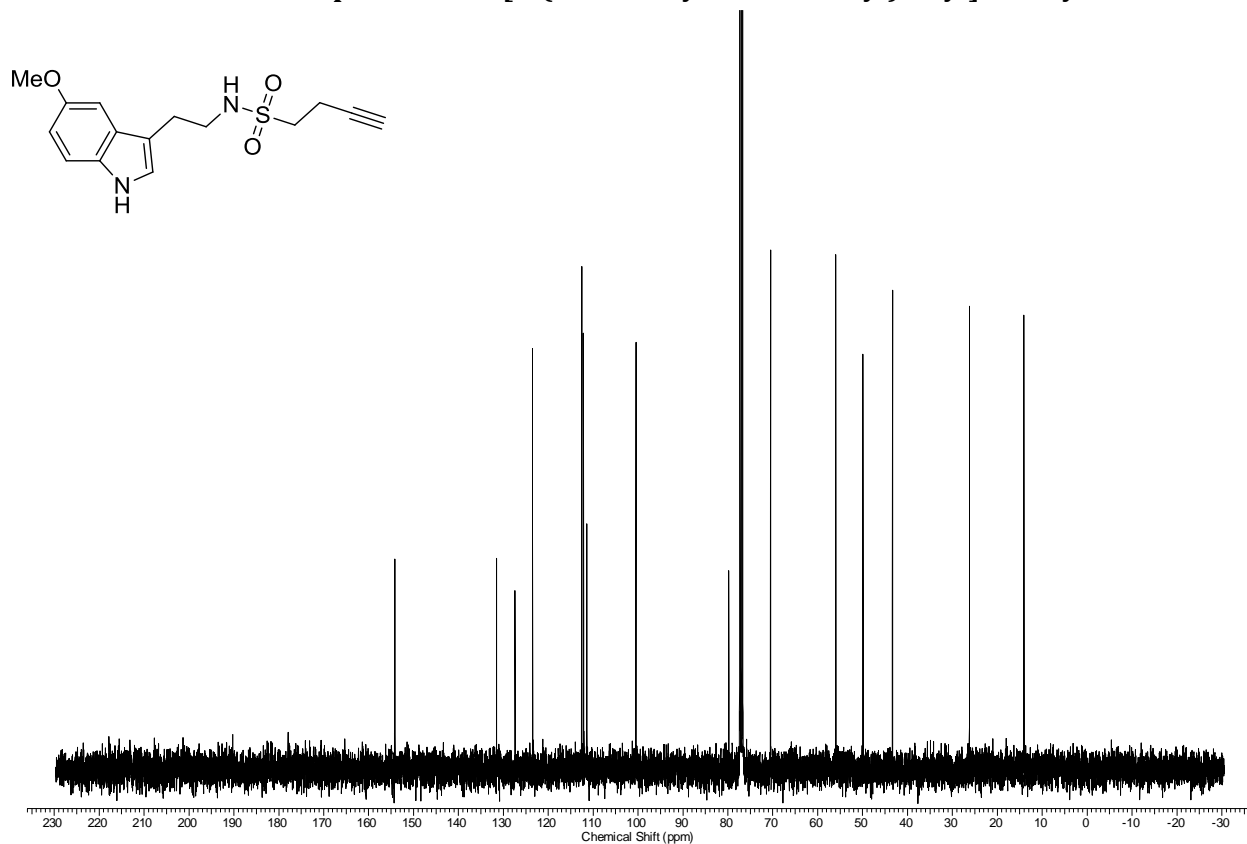

3.1.17. <sup>1</sup>HNMR spectra for *N*-[2-(5-methyl-1*H*-indol-3-yl)ethyl]but-3-yne-1-sulfonamide 5i

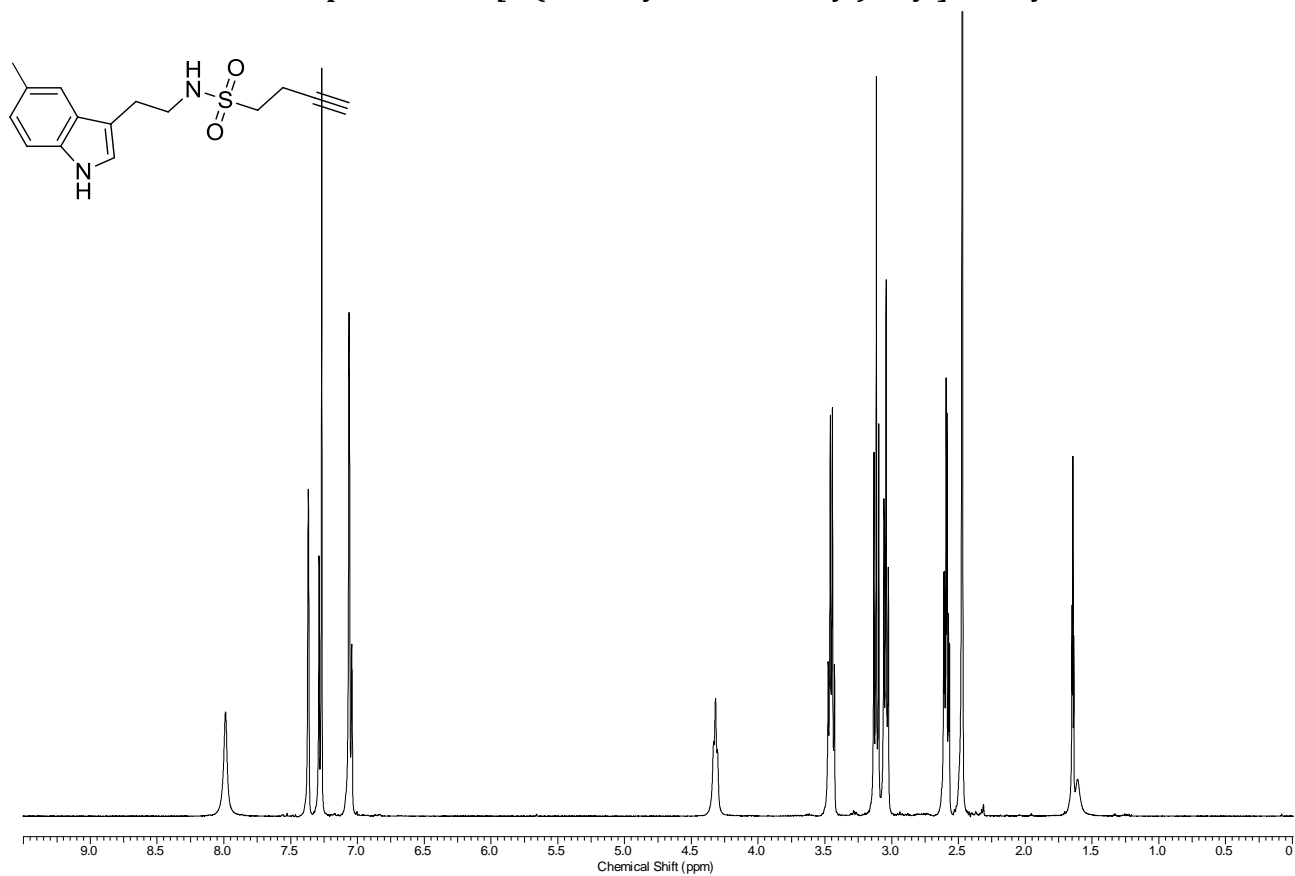

3.1.18. <sup>13</sup>CNMR spectra for *N*-[2-(5-methyl-1*H*-indol-3-yl)ethyl]but-3-yne-1-sulfonamide 5i

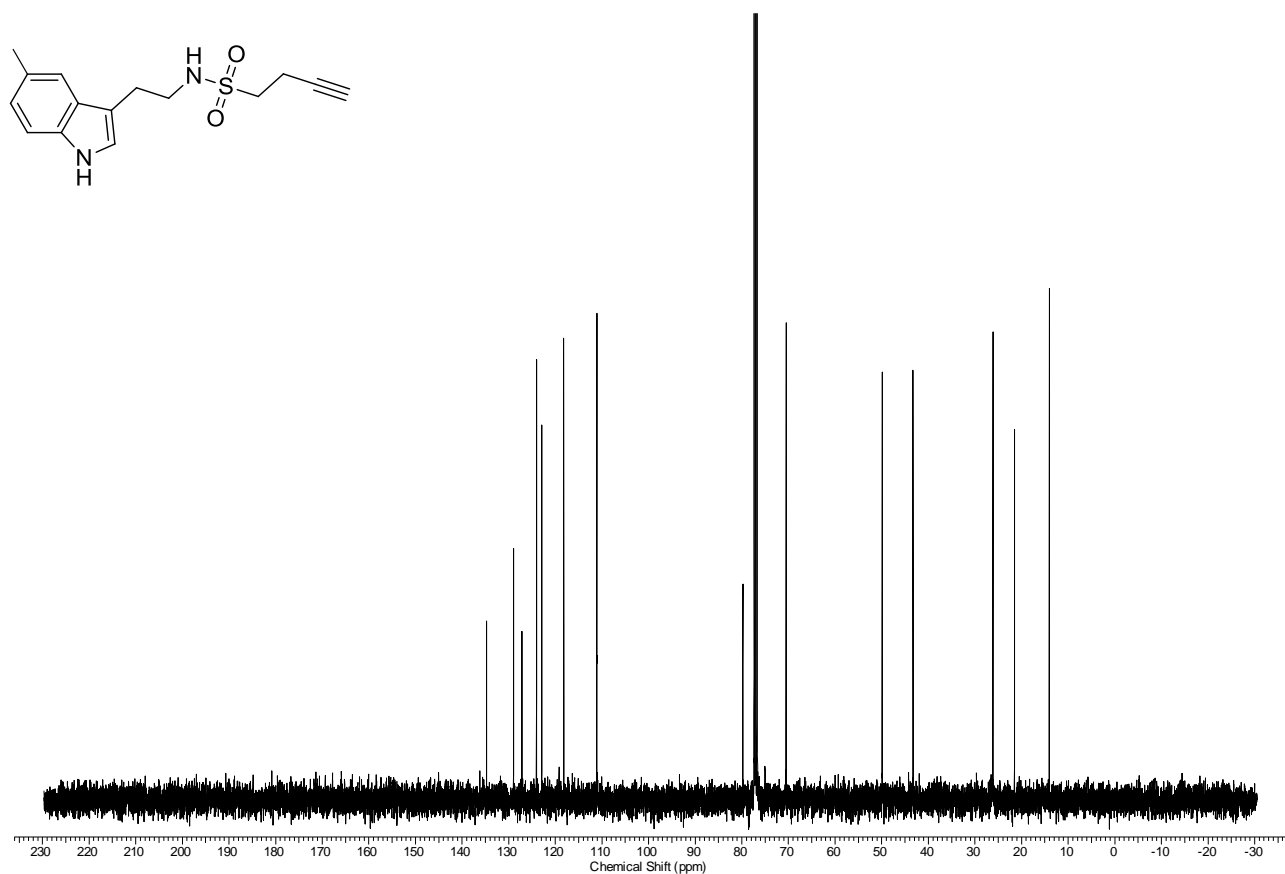



3.1.19. <sup>1</sup>H NMR spectra for *N*-[2-(7-methyl-1*H*-indol-3-yl)ethyl]but-3-yn-1-sulfonamide 5j

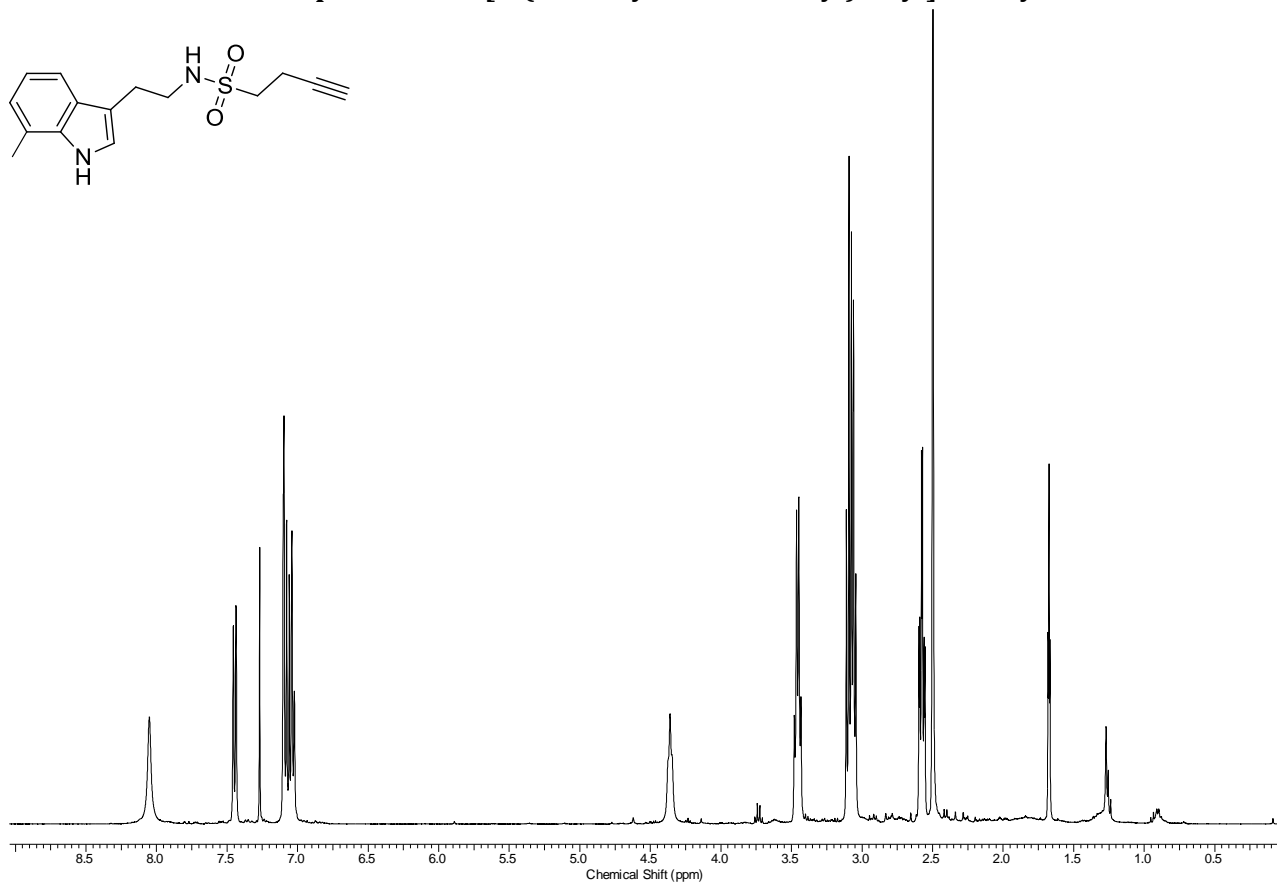

3.1.20. <sup>13</sup>C NMR spectra for *N*-[2-(7-methyl-1*H*-indol-3-yl)ethyl]but-3-yn-1-sulfonamide 5j

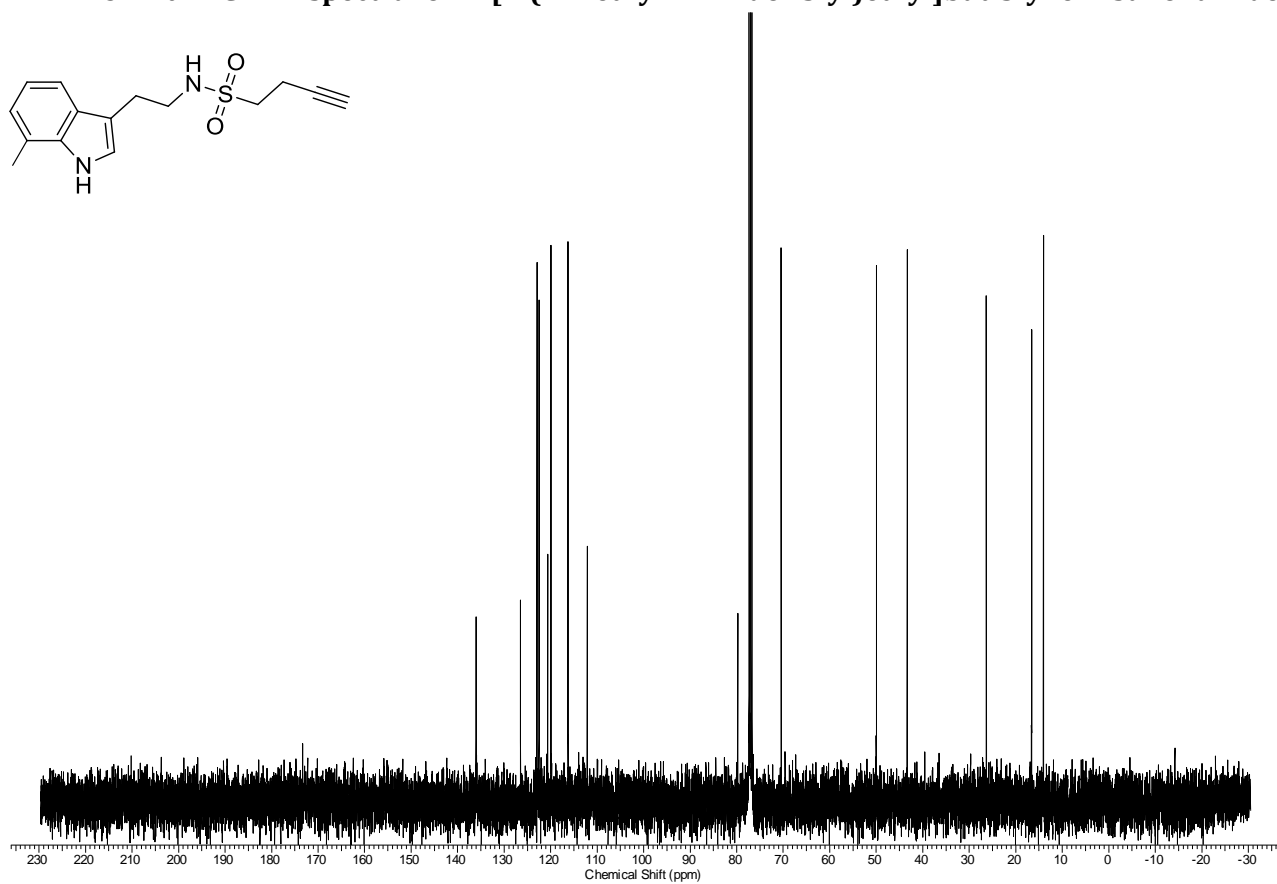

3.1.21. <sup>1</sup>HNMR spectra for *N*-[2-(7-ethyl-1*H*-indol-3-yl)ethyl]but-3-yne-1-sulfonamide 5k

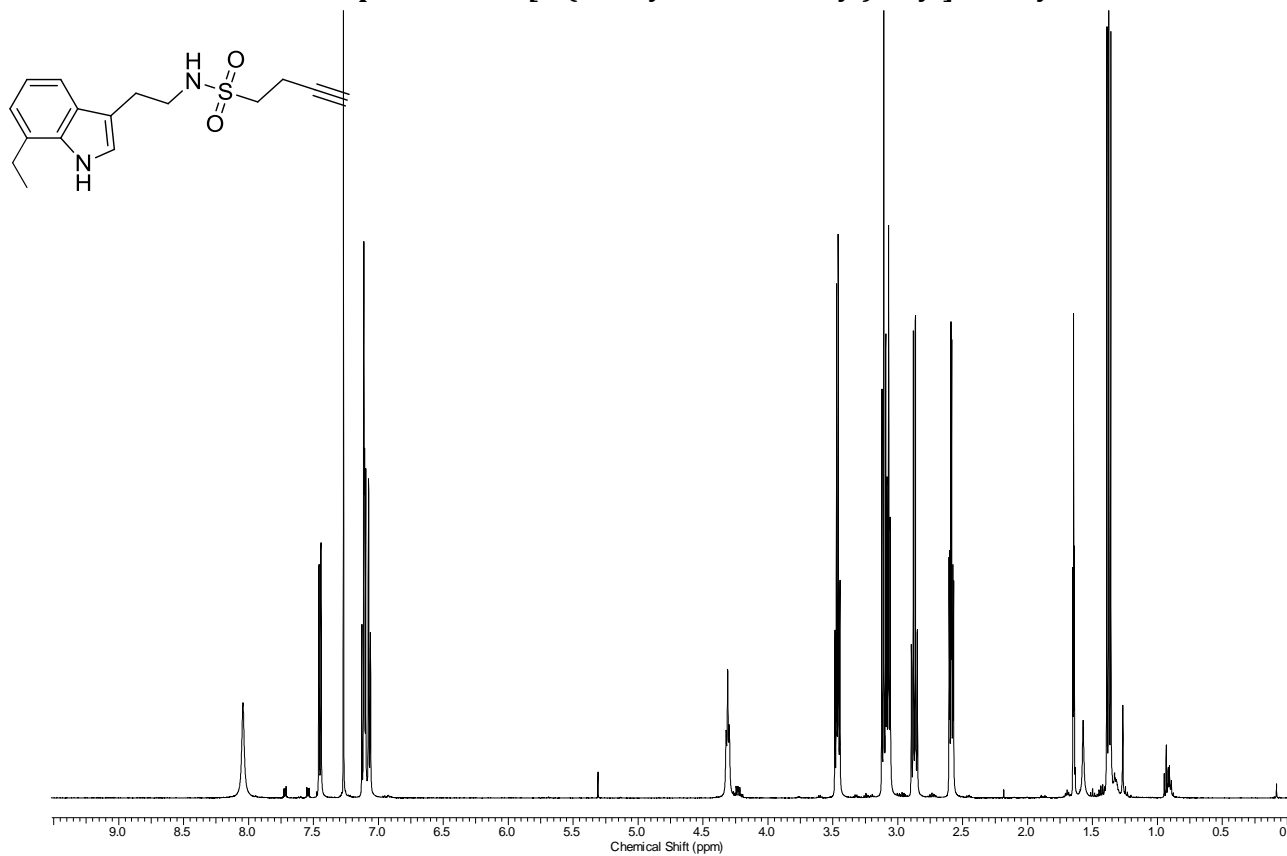

3.1.22. <sup>13</sup>CNMR spectra for *N*-[2-(7-ethyl-1*H*-indol-3-yl)ethyl]but-3-yne-1-sulfonamide 5k

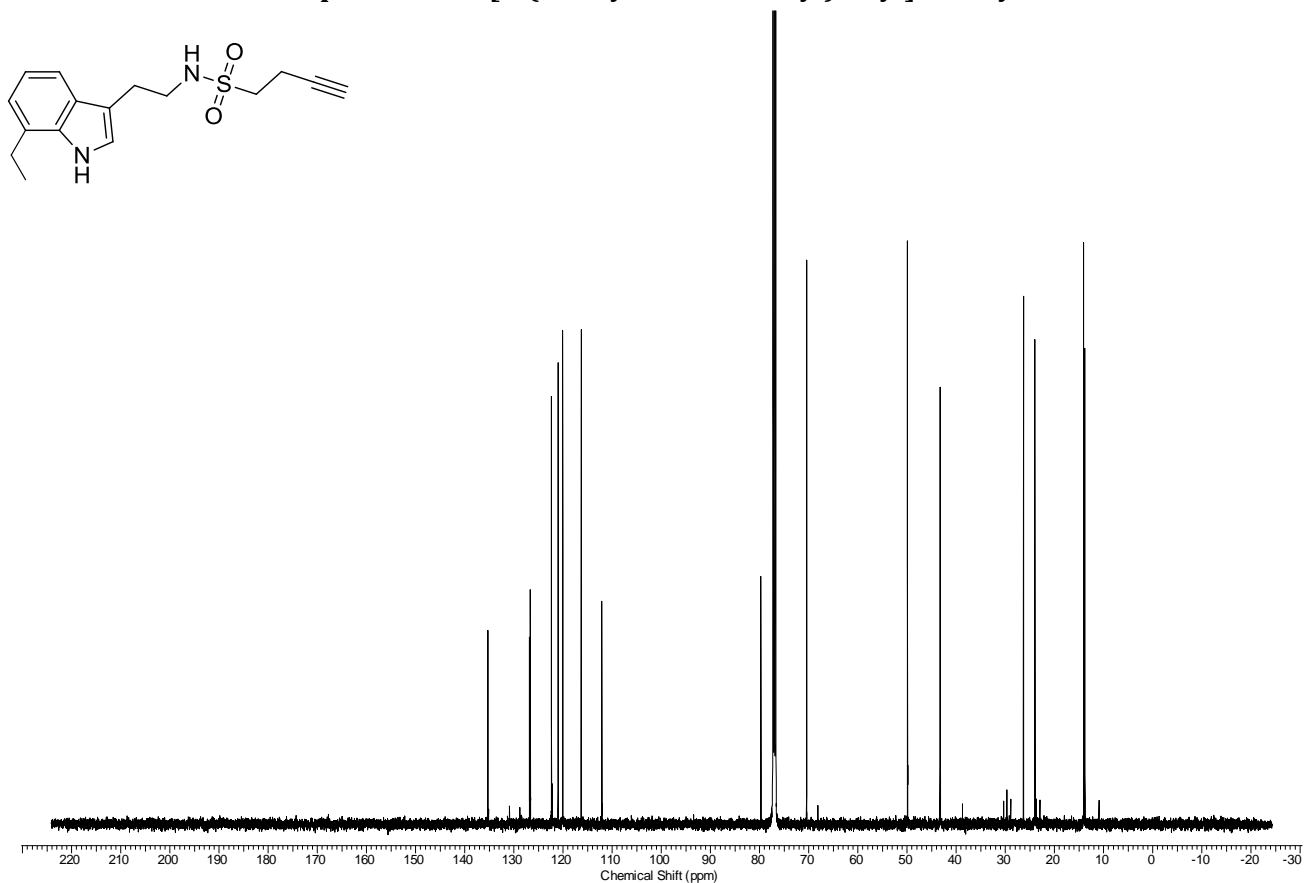

## 3.2. Sulfonamide cyclization products

### 3.2.1. <sup>1</sup>H NMR spectra for 11b-methyl-1,2,5,6,11,11b-hexahydroisothiazolo[2',3':1,2]pyrido[3,4-b]indole-3,3-dioxide 6a

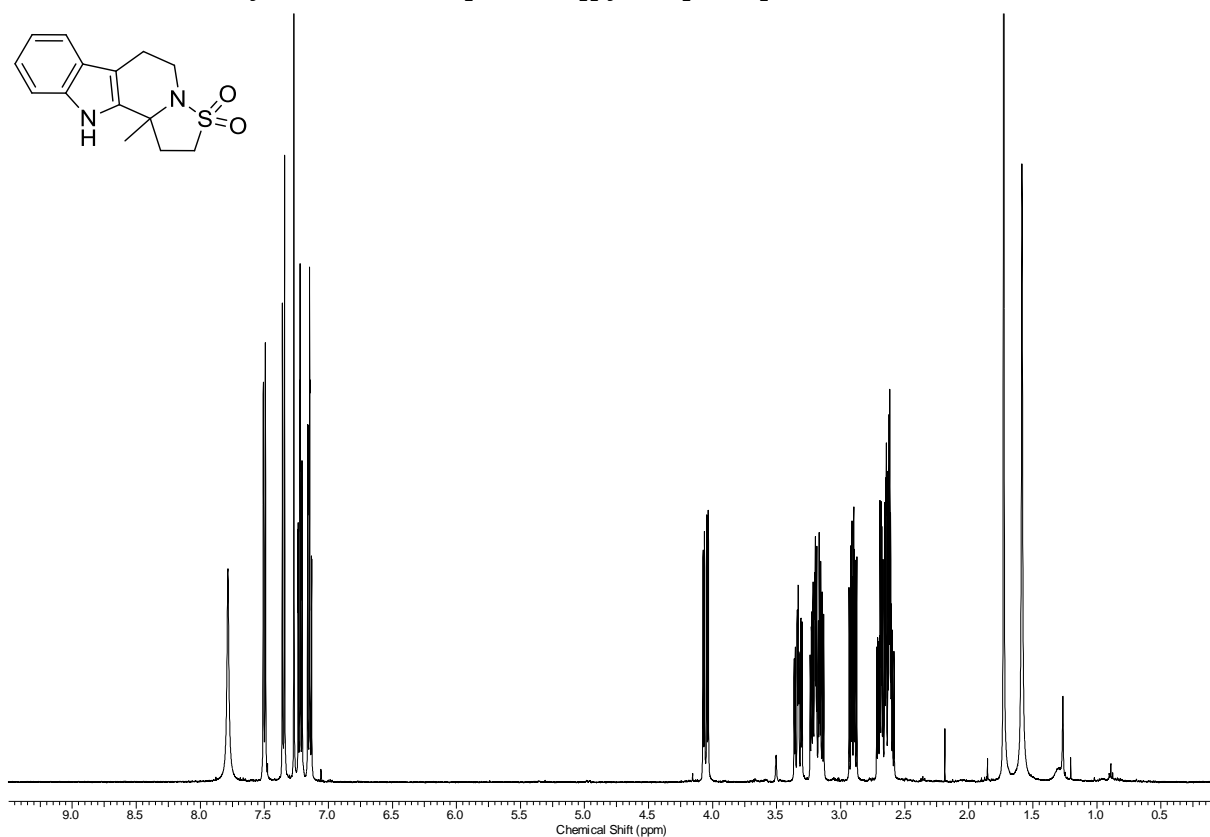

### 3.2.2. <sup>13</sup>C NMR spectra for 11b-methyl-1,2,5,6,11,11b-hexahydroisothiazolo[2',3':1,2]pyrido[3,4-b]indole 3,3-dioxide 6a

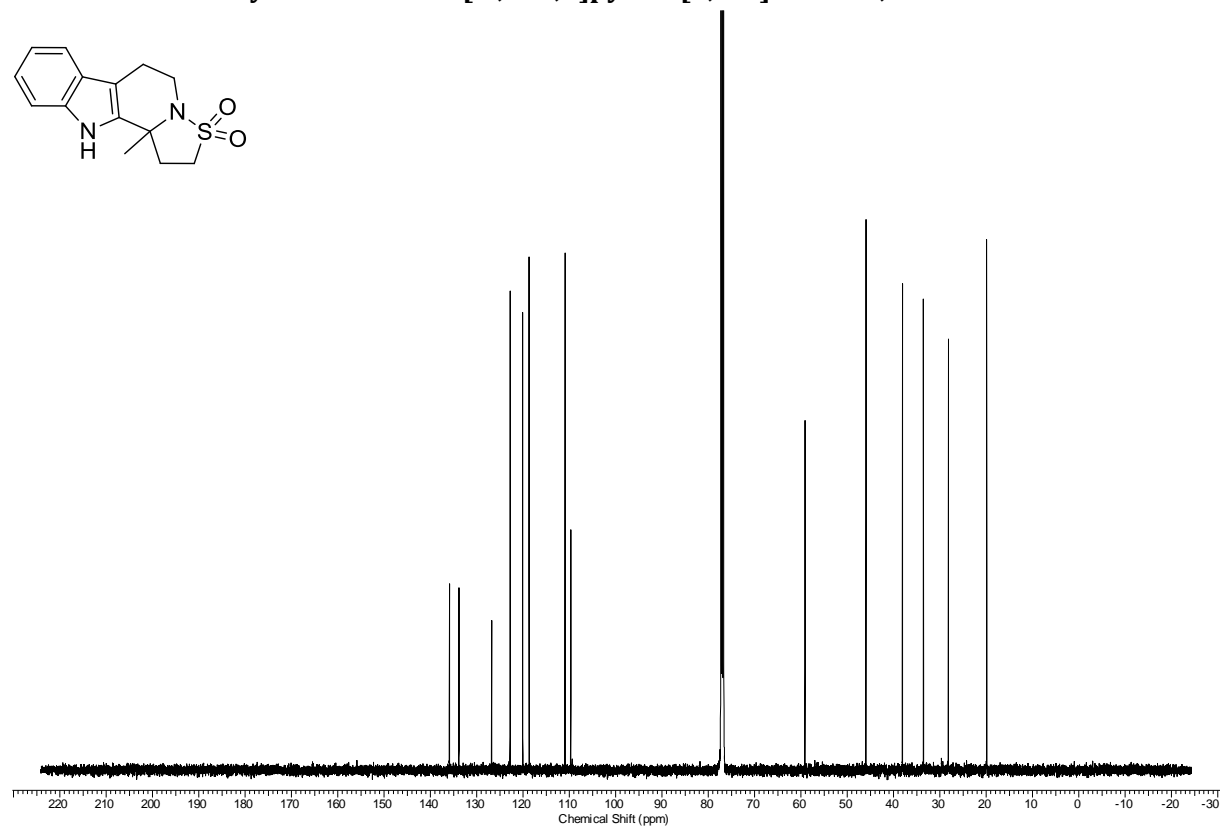



3.2.5. <sup>1</sup>H NMR spectra for 7-chloro-11b-methyl-1,2,5,6,11,11b-hexahydro[1,2]thiazolo[2',3':1,2]pyrido[3,4-b]indole 3,3-dioxide 6b

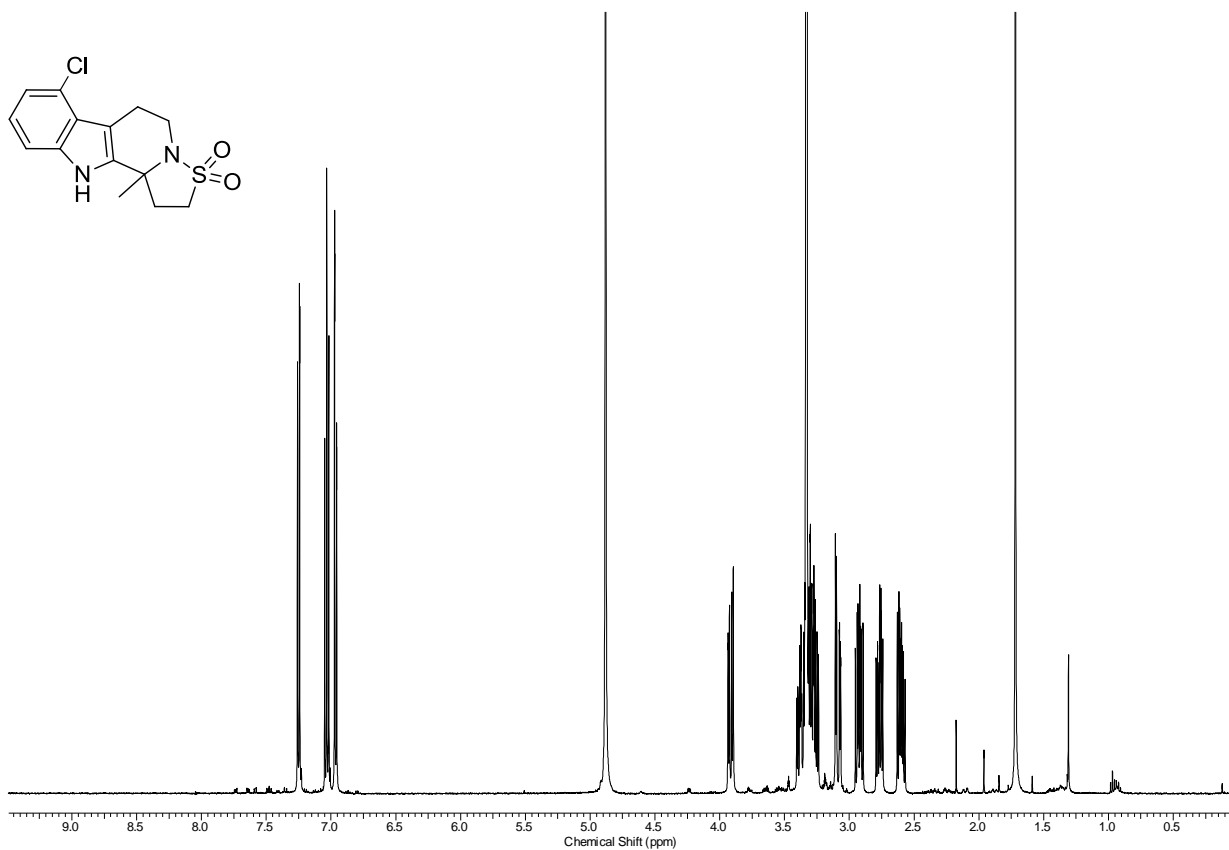

3.2.6. <sup>13</sup>C NMR spectra for 7-chloro-11b-methyl-1,2,5,6,11,11b-hexahydro[1,2]thiazolo[2',3':1,2]pyrido[3,4-b]indole 3,3-dioxide 6b

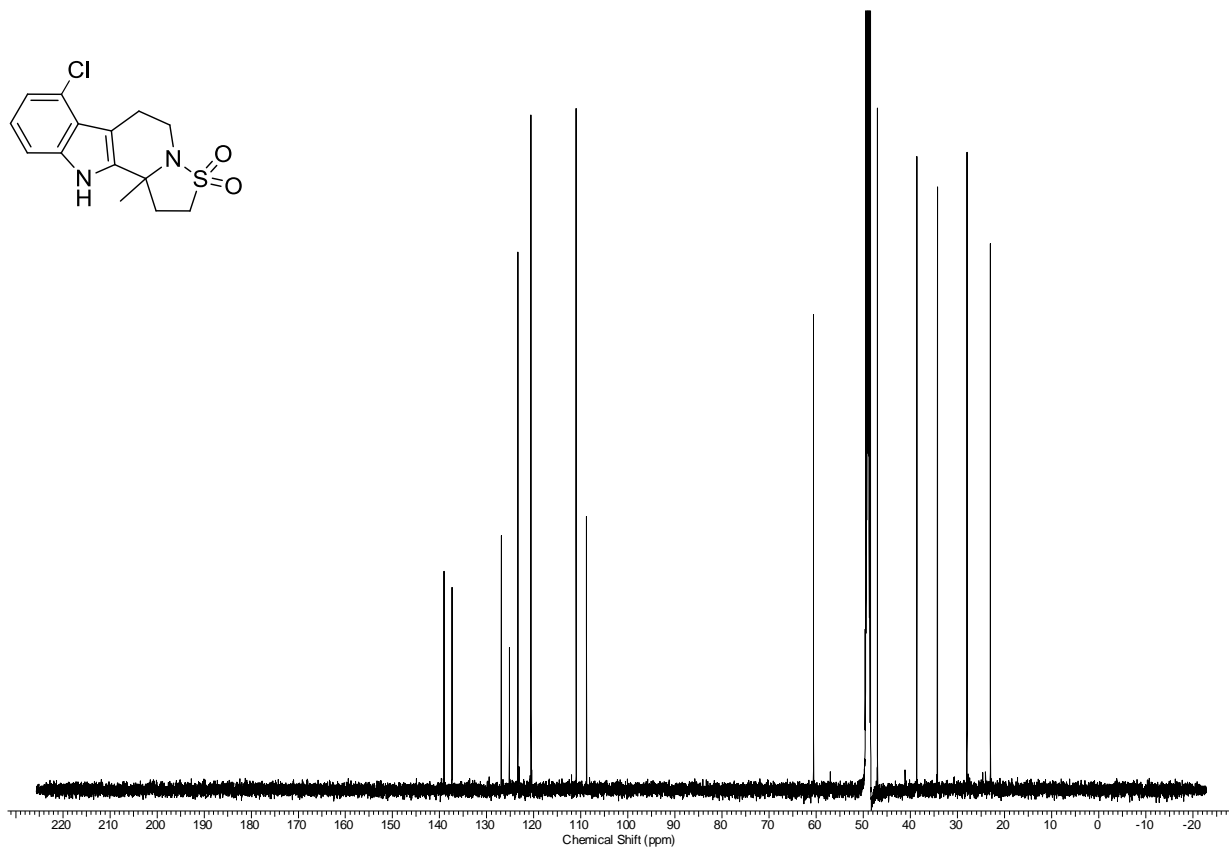

3.2.7. <sup>1</sup>H NMR spectra for 8-bromo-11b-methyl-1,2,5,6,11,11b-hexahydro[1,2]thiazolo[2',3':1,2]pyrido[3,4-b]indole 3,3-dioxide 6c

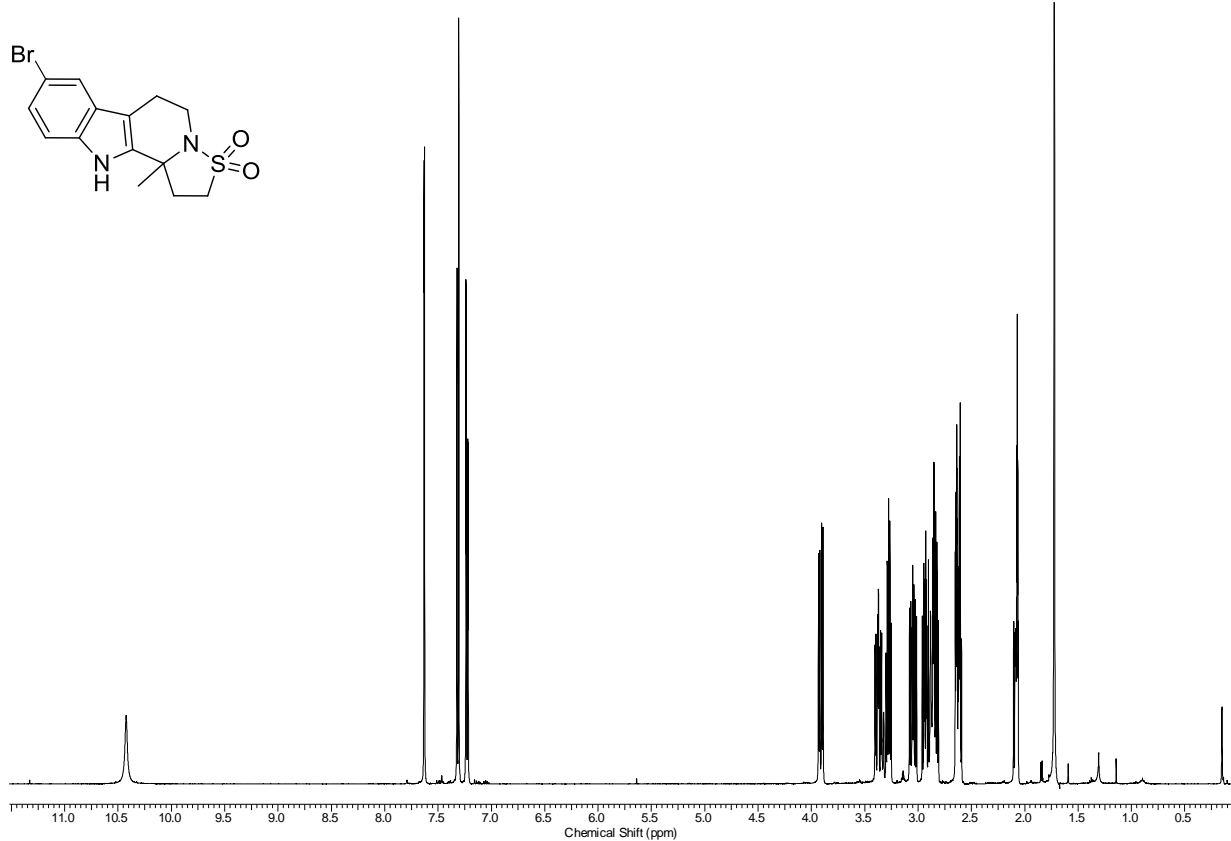

3.2.8. <sup>13</sup>C NMR spectra for 8-bromo-11b-methyl-1,2,5,6,11,11b-hexahydro[1,2]thiazolo[2',3':1,2]pyrido[3,4-b]indole 3,3-dioxide 6c

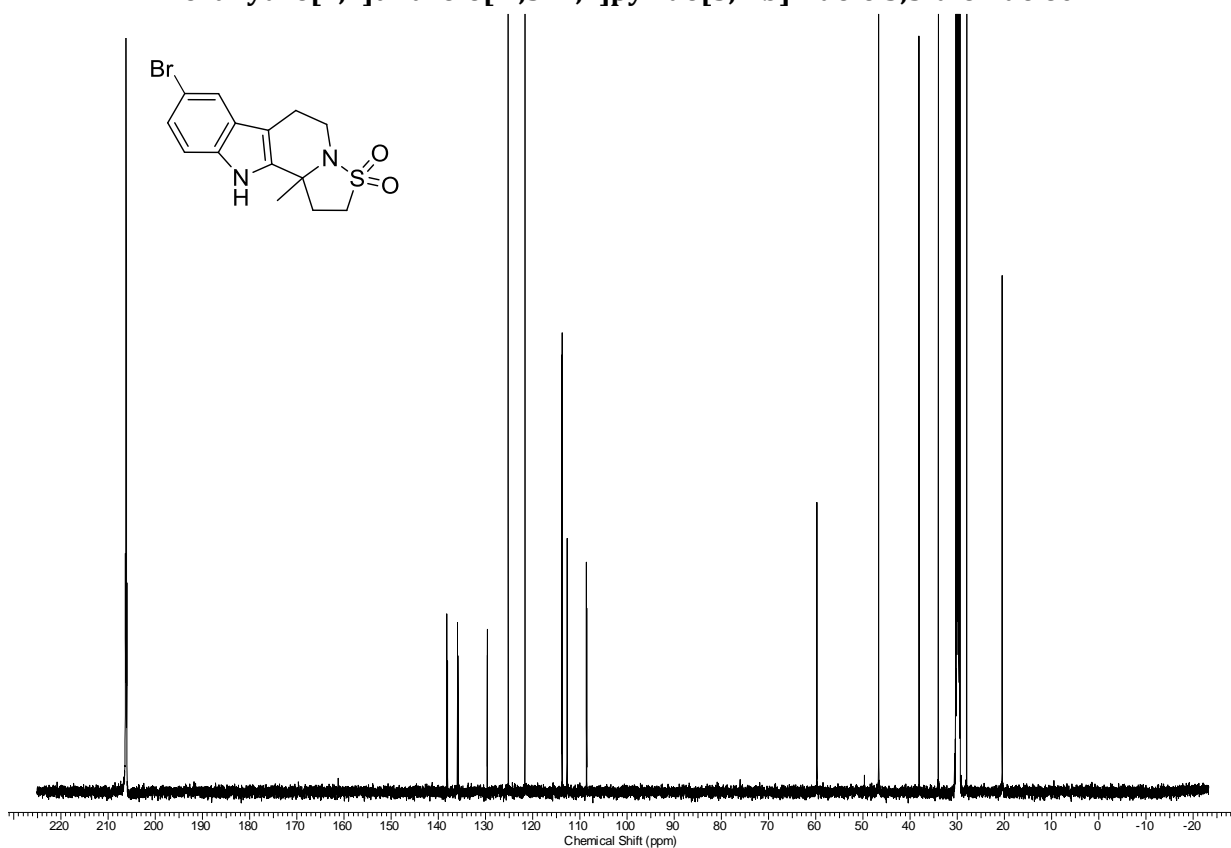

3.2.9. <sup>1</sup>H NMR spectra for 9-bromo-11b-methyl-1,2,5,6,11,11b-hexahydro[1,2]thiazolo[2',3':1,2]pyrido[3,4-b]indole 3,3-dioxide 6d

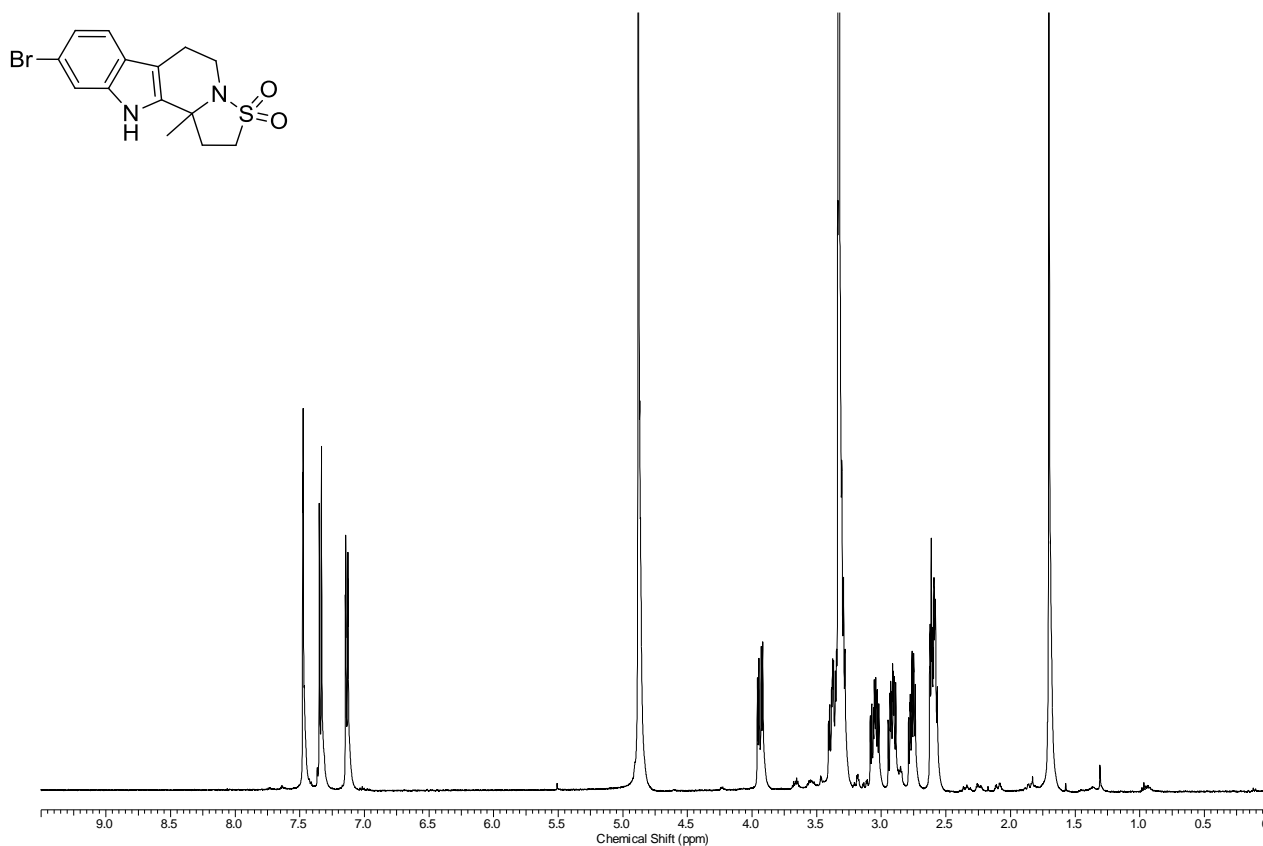

3.2.10. <sup>13</sup>C NMR spectra for 9-bromo-11b-methyl-1,2,5,6,11,11b-hexahydro[1,2]thiazolo[2',3':1,2]pyrido[3,4-b]indole 3,3-dioxide 6d

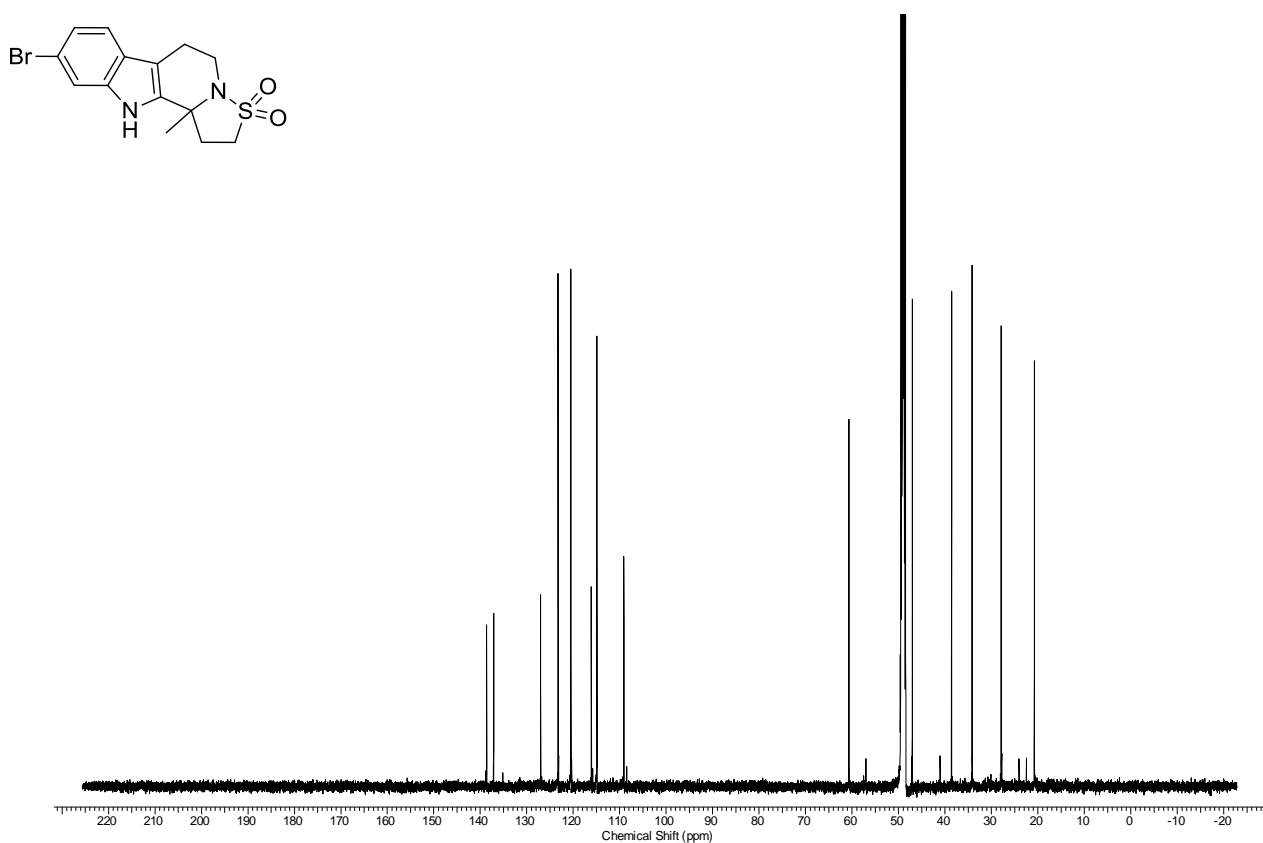

3.2.11. <sup>1</sup>HNMR spectra for 8-fluoro-11b-methyl-1,2,5,6,11,11b-hexahydro[1,2]thiazolo[2',3':1,2]pyrido[3,4-b]indole 3,3-dioxide 6e

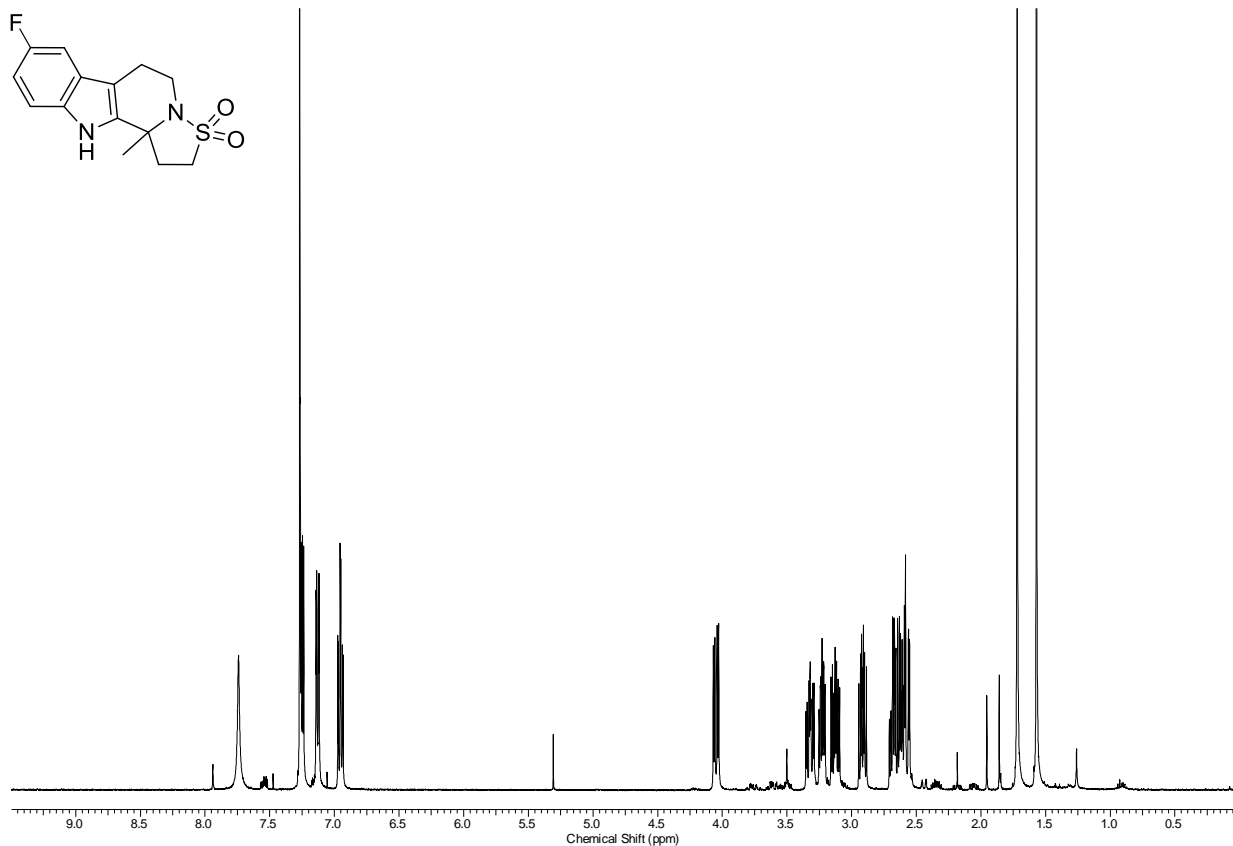

3.2.12. <sup>13</sup>CNMR spectra for 8-fluoro-11b-methyl-1,2,5,6,11,11b-hexahydro[1,2]thiazolo[2',3':1,2]pyrido[3,4-b]indole 3,3-dioxide 6e

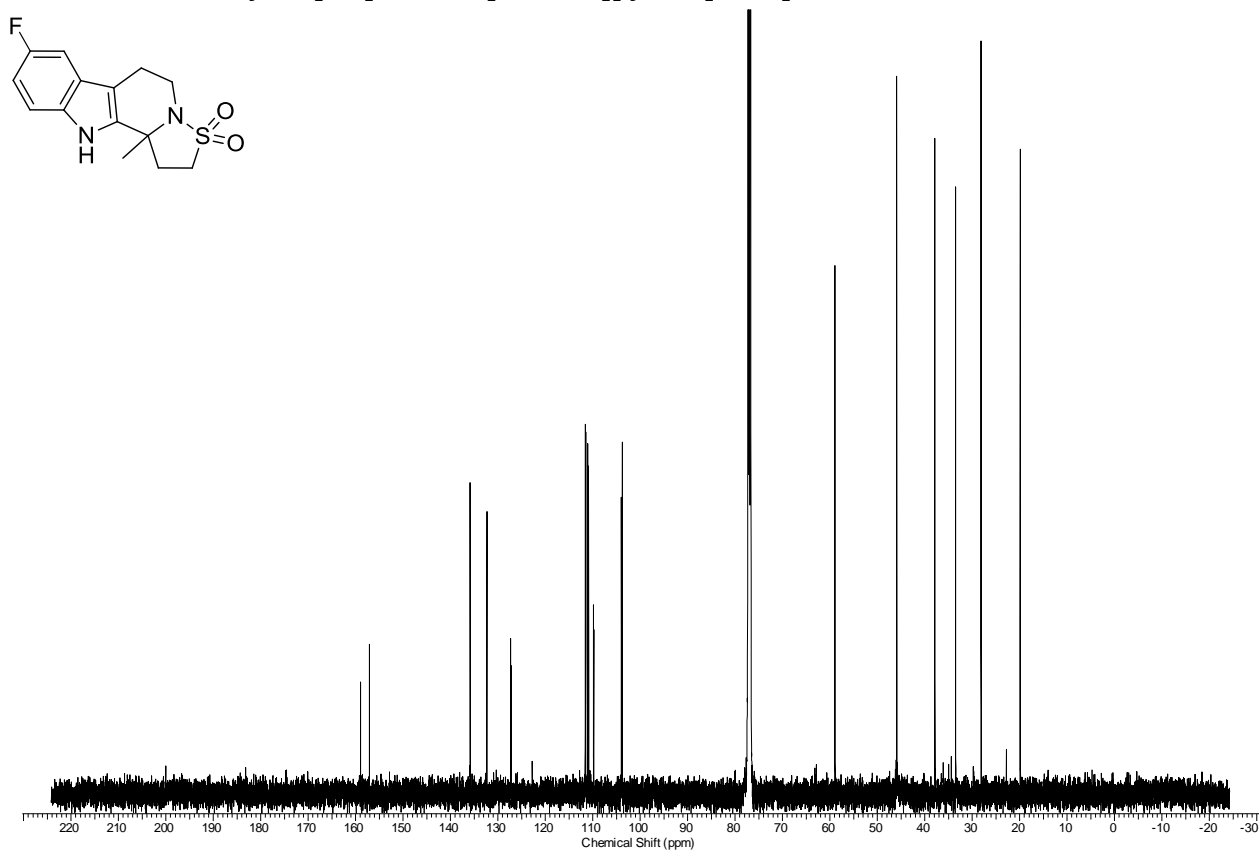



3.2.13. <sup>1</sup>HNMR spectra for 9-fluoro-11b-methyl-1,2,5,6,11,11b-hexahydro[1,2]thiazolo[2',3':1,2]pyrido[3,4-b]indole 3,3-dioxide 6f

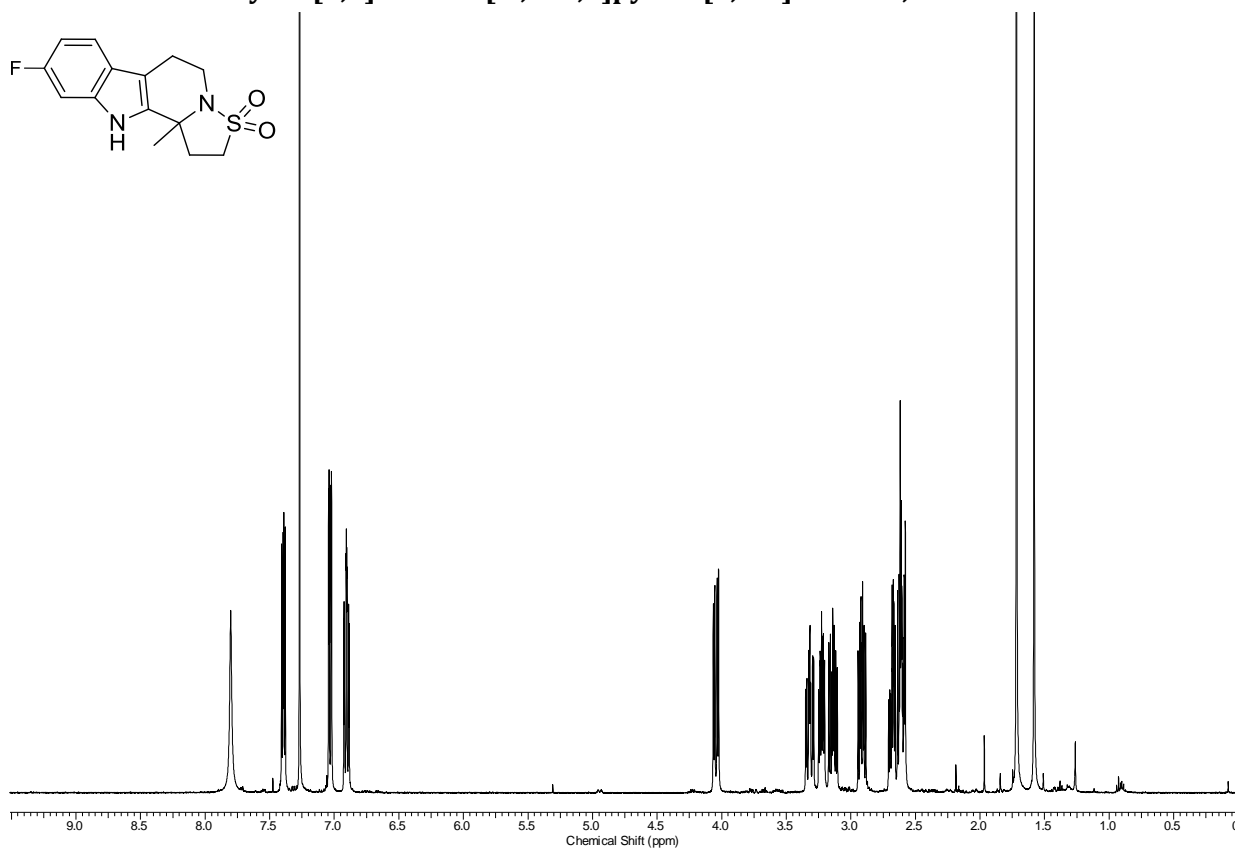

3.2.14. <sup>13</sup>CNMR spectra for 9-fluoro-11b-methyl-1,2,5,6,11,11b-hexahydro[1,2]thiazolo[2',3':1,2]pyrido[3,4-b]indole 3,3-dioxide 6f

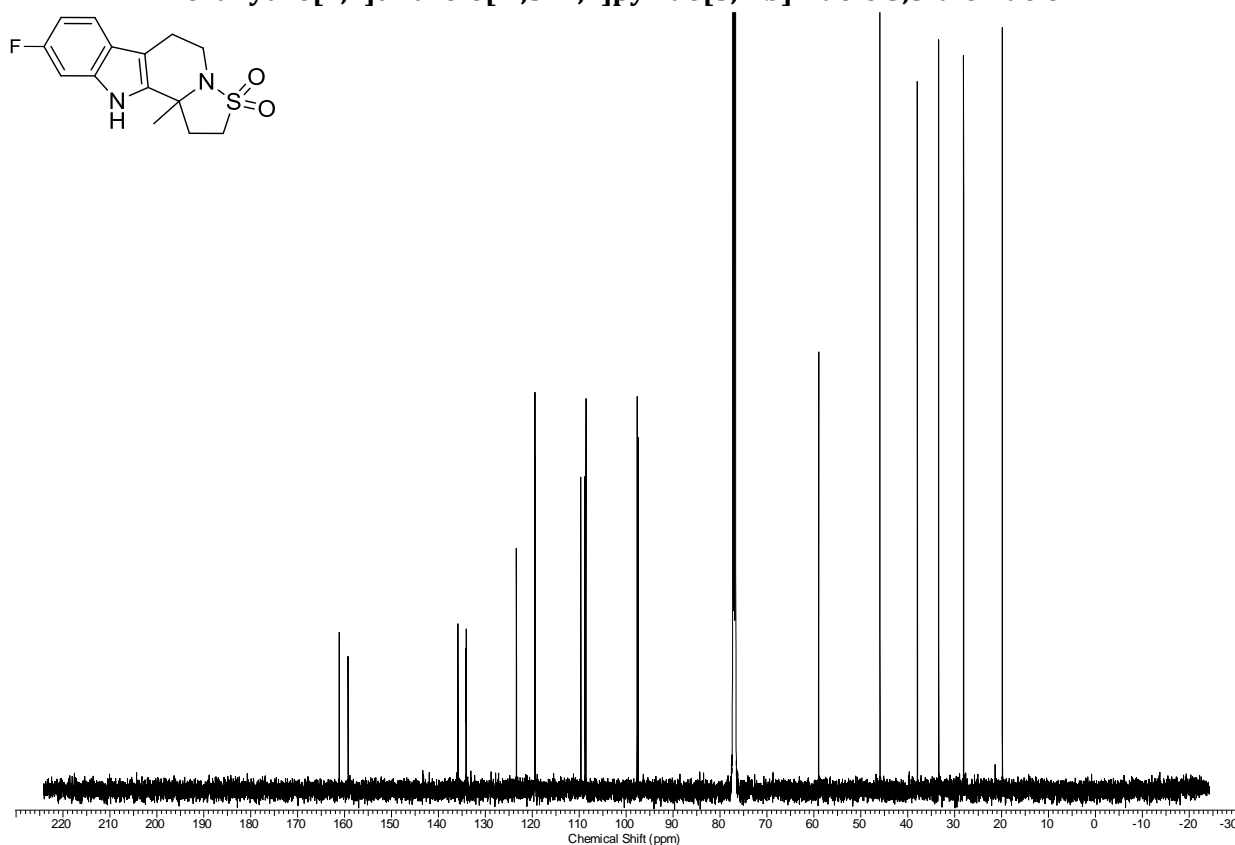

3.2.15. <sup>1</sup>HNMR spectra for 11b-methyl-1,2,5,6,11,11b-hexahydro[1,2]thiazolo[2',3':1,2]pyrido[3,4-b]indole-8-carbonitrile 3,3-dioxide 6g

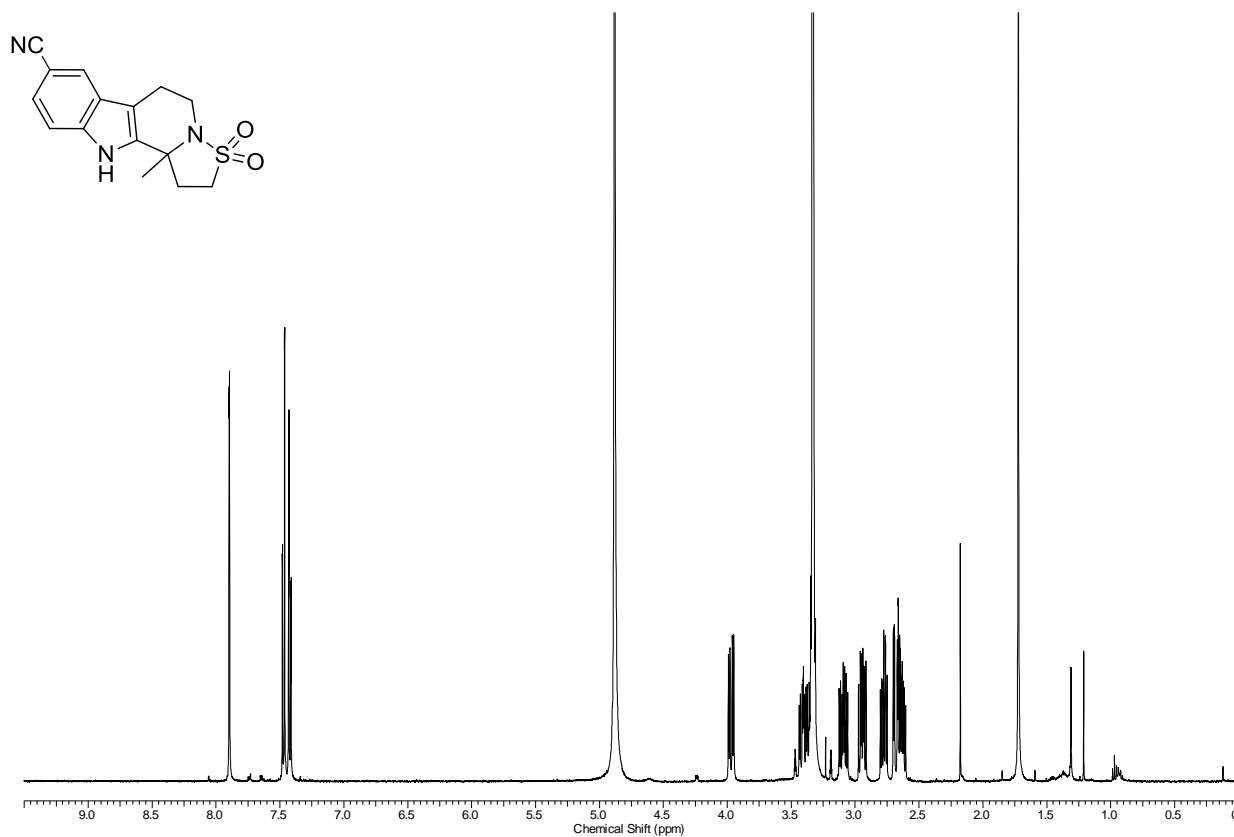

3.2.16. <sup>13</sup>CNMR spectra for 11b-methyl-1,2,5,6,11,11b-hexahydro[1,2]thiazolo[2',3':1,2]pyrido[3,4-b]indole-8-carbonitrile 3,3-dioxide 6g

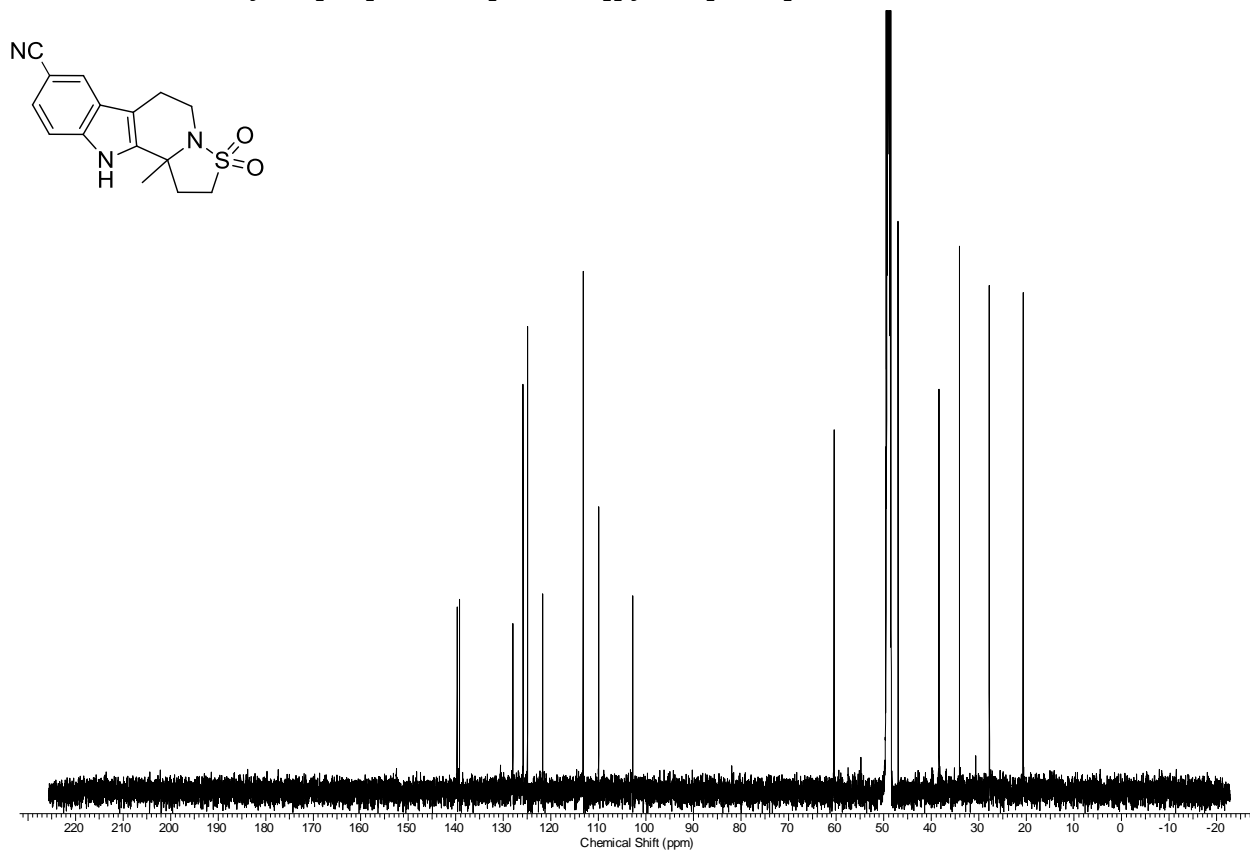

3.2.17. <sup>1</sup>HNMR spectra for 8-methoxy-11b-methyl-1,2,5,6,11,11b-hexahydro[1,2]thiazolo[2',3':1,2]pyrido[3,4-b]indole 3,3-dioxide 6h

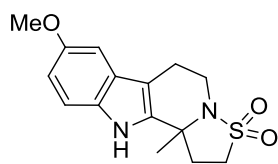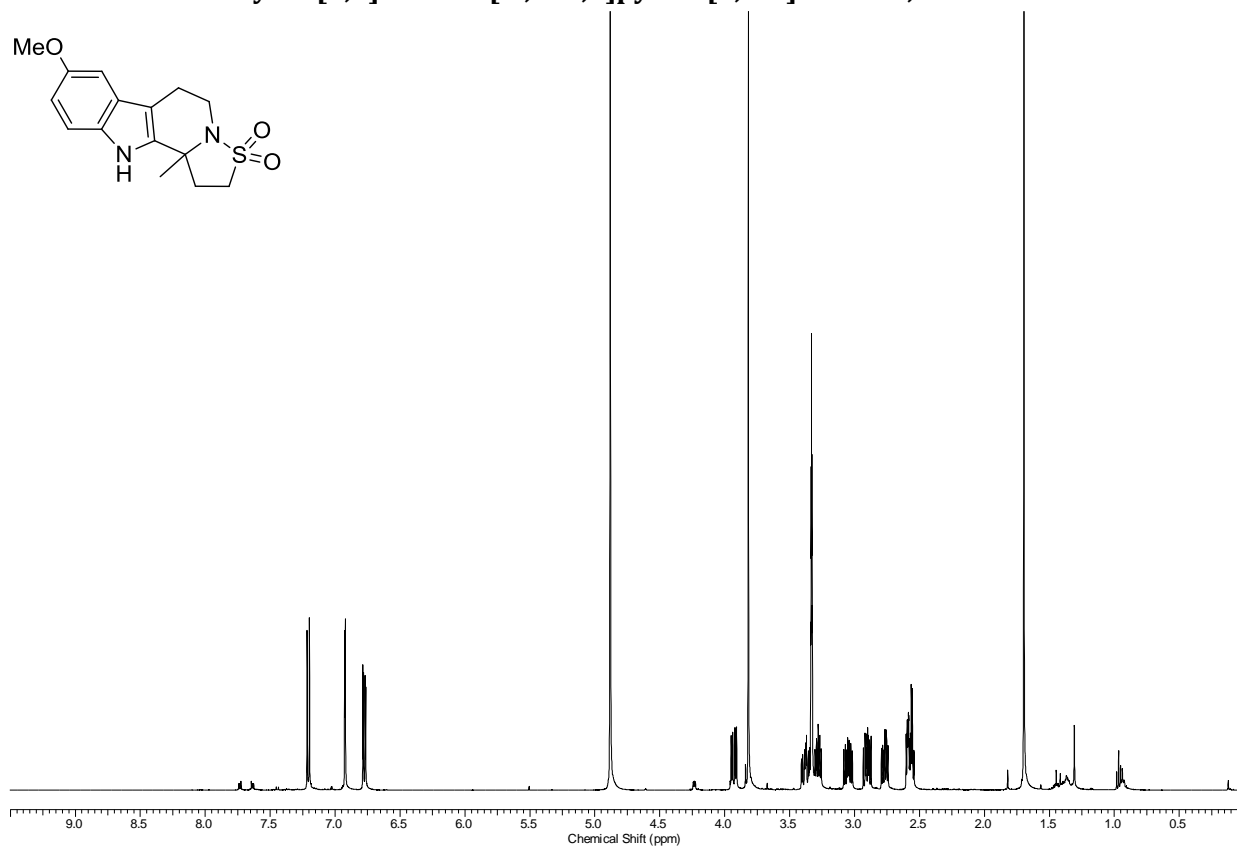

3.2.18. <sup>13</sup>CNMR spectra for 8-methoxy-11b-methyl-1,2,5,6,11,11b-hexahydro[1,2]thiazolo[2',3':1,2]pyrido[3,4-b]indole 3,3-dioxide 6h

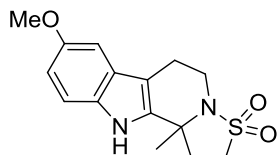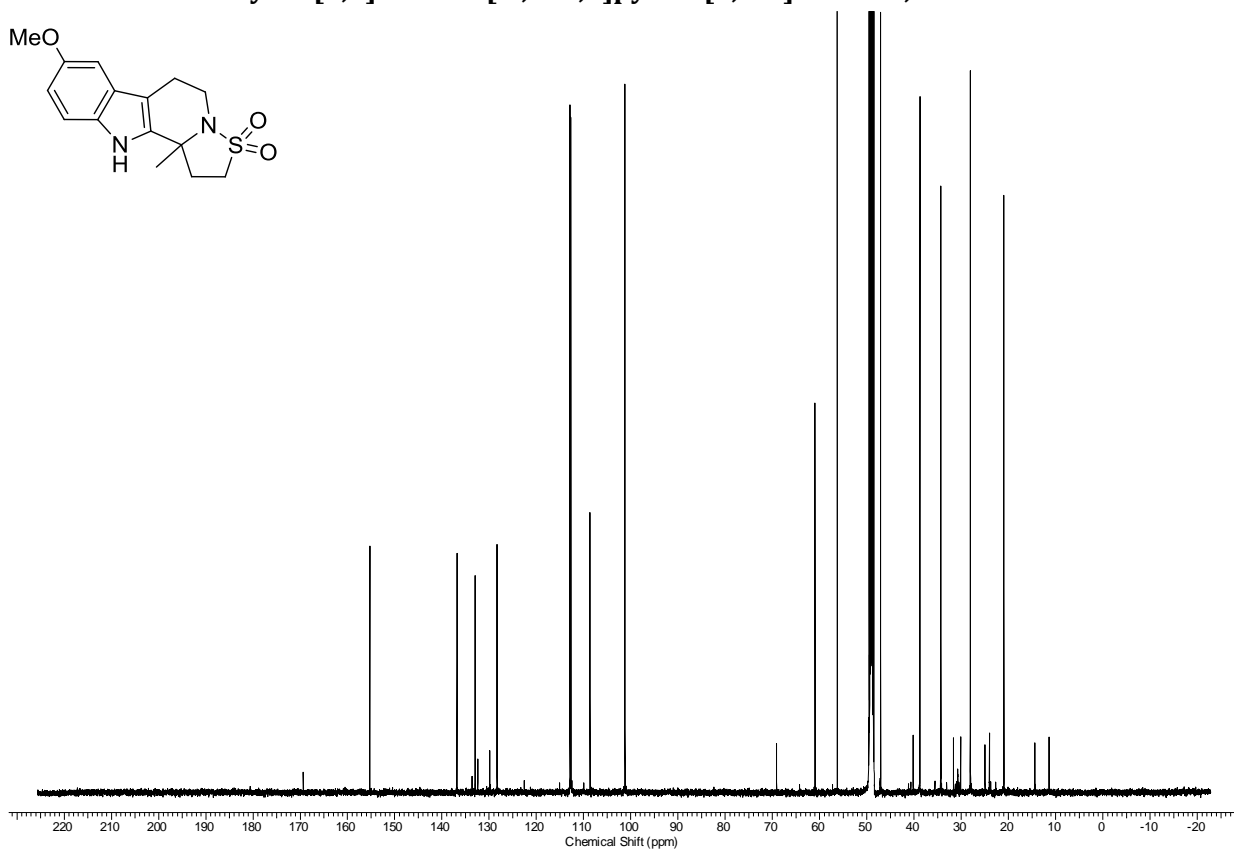

3.2.1. <sup>1</sup>H NMR spectra for 8,11b-dimethyl-1,2,5,6,11,11b-hexahydro[1,2]thiazolo[2',3':1,2]pyrido[3,4-b]indole 3,3-dioxide 6i

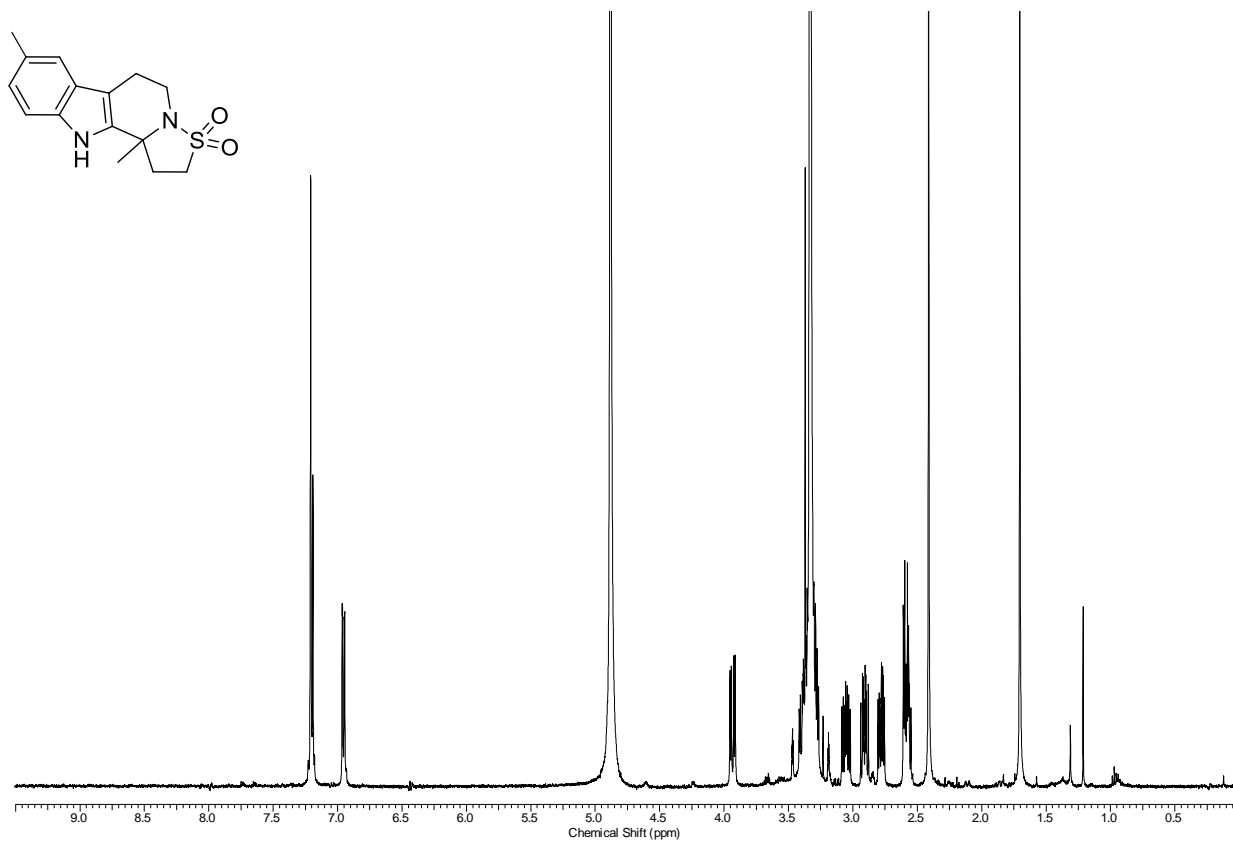

3.2.2. <sup>13</sup>C NMR spectra for 8,11b-dimethyl-1,2,5,6,11,11b-hexahydro[1,2]thiazolo[2',3':1,2]pyrido[3,4-b]indole 3,3-dioxide 6i

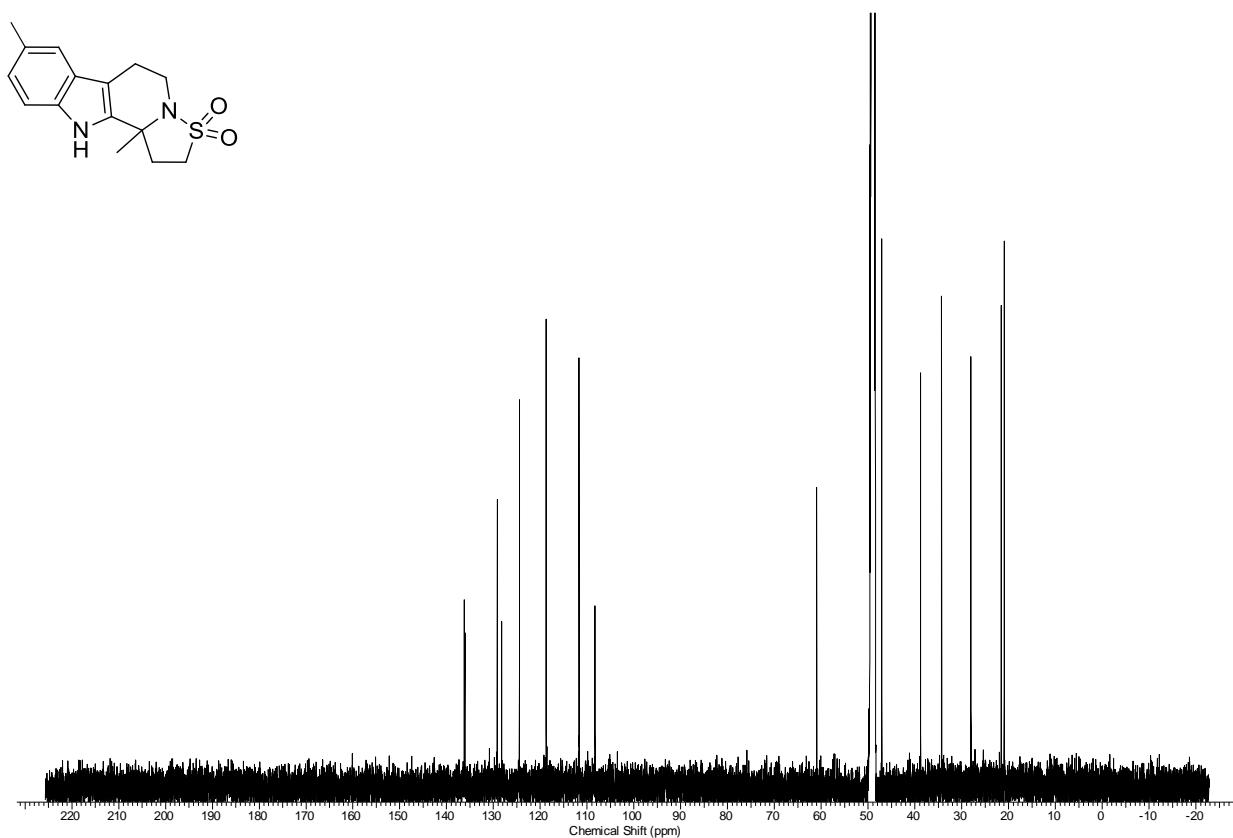

3.2.3. <sup>1</sup>H NMR spectra for 10,11b-dimethyl-1,2,5,6,11,11b-hexahydro[1,2]thiazolo[2',3':1,2]pyrido[3,4-b]indole 3,3-dioxide 6j

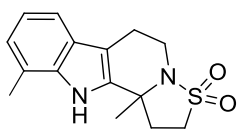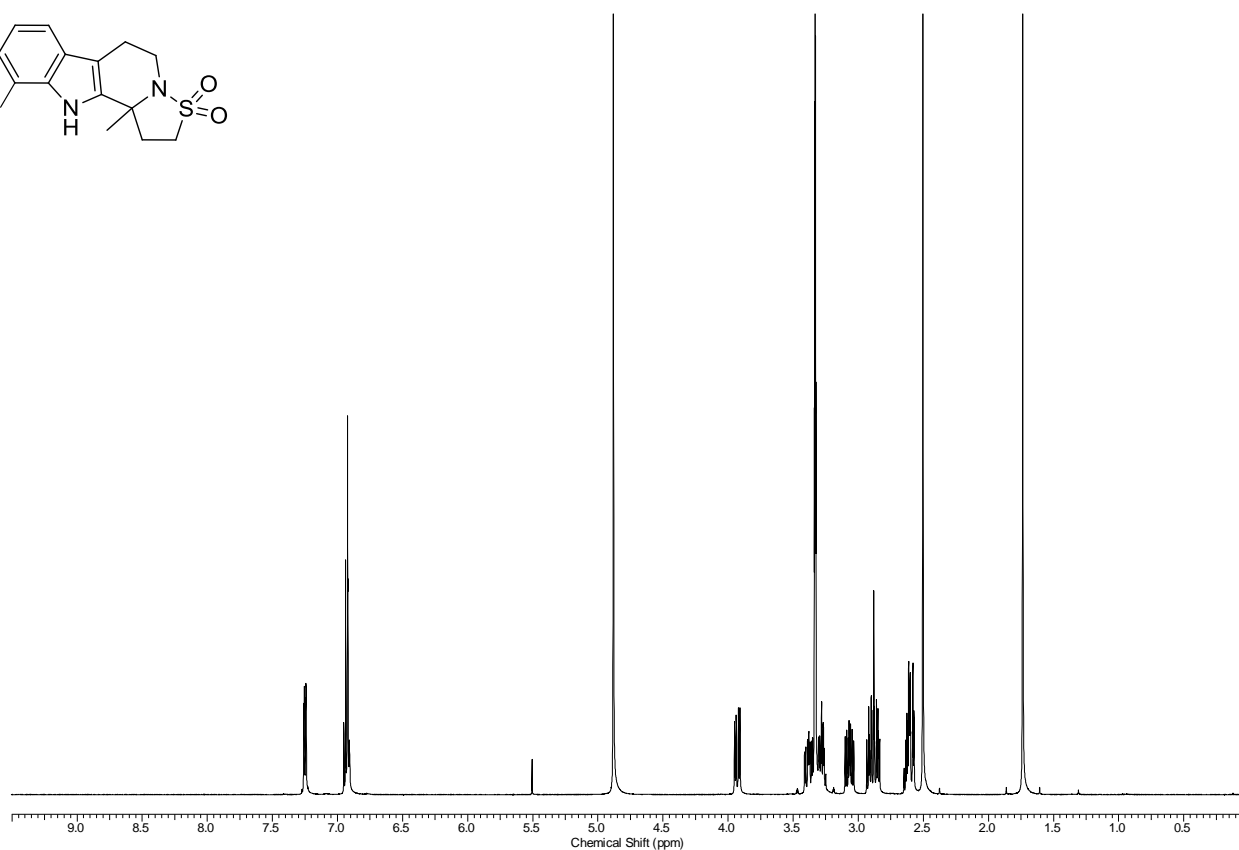

3.2.4. <sup>13</sup>C NMR spectra for 10,11b-dimethyl-1,2,5,6,11,11b-hexahydro[1,2]thiazolo[2',3':1,2]pyrido[3,4-b]indole 3,3-dioxide 6j

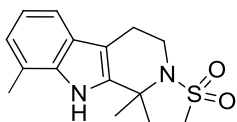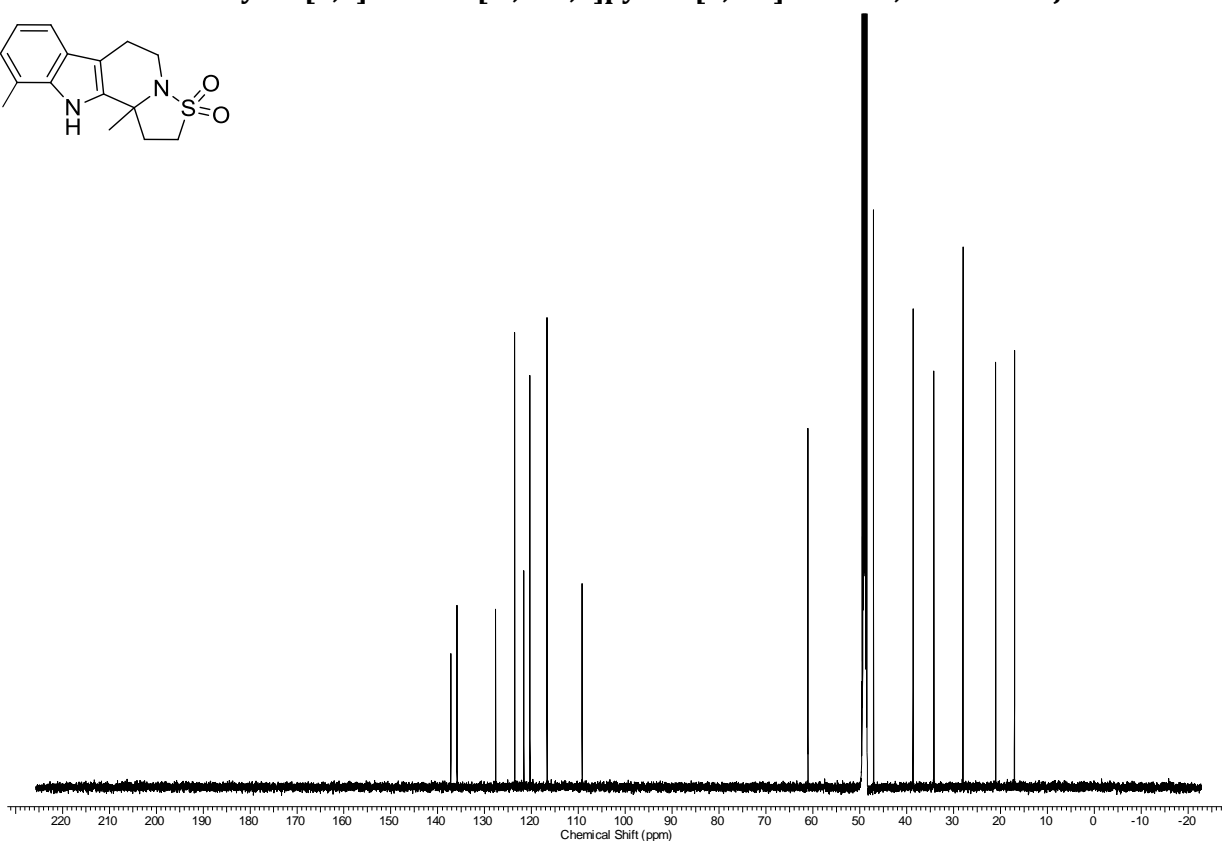

3.2.5. <sup>1</sup>H NMR spectra for 10-ethyl-11b-methyl-1,2,5,6,11,11b-hexahydro[1,2]thiazolo[2',3':1,2]pyrido[3,4-b]indole 3,3-dioxide 6k

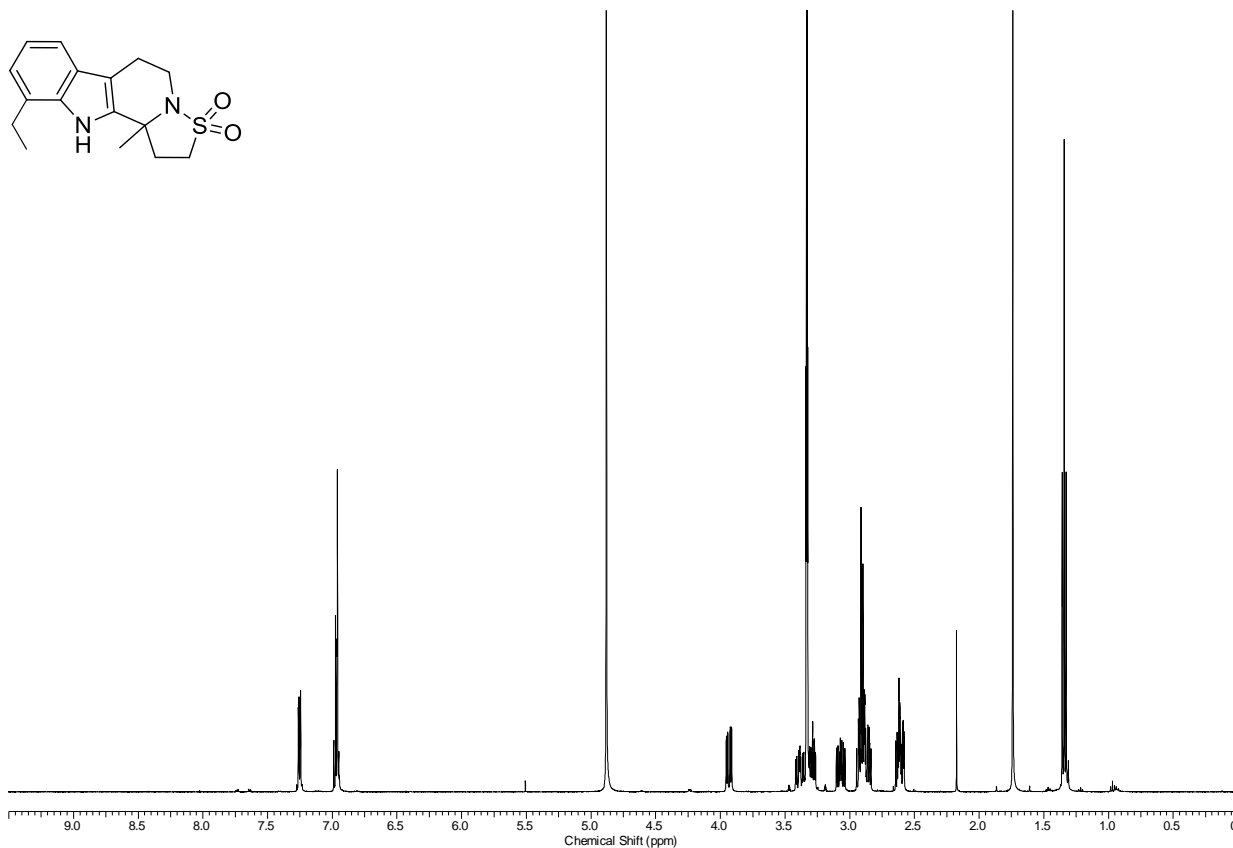

3.2.6. <sup>13</sup>C NMR spectra for 10-ethyl-11b-methyl-1,2,5,6,11,11b-hexahydro[1,2]thiazolo[2',3':1,2]pyrido[3,4-b]indole 3,3-dioxide 6k

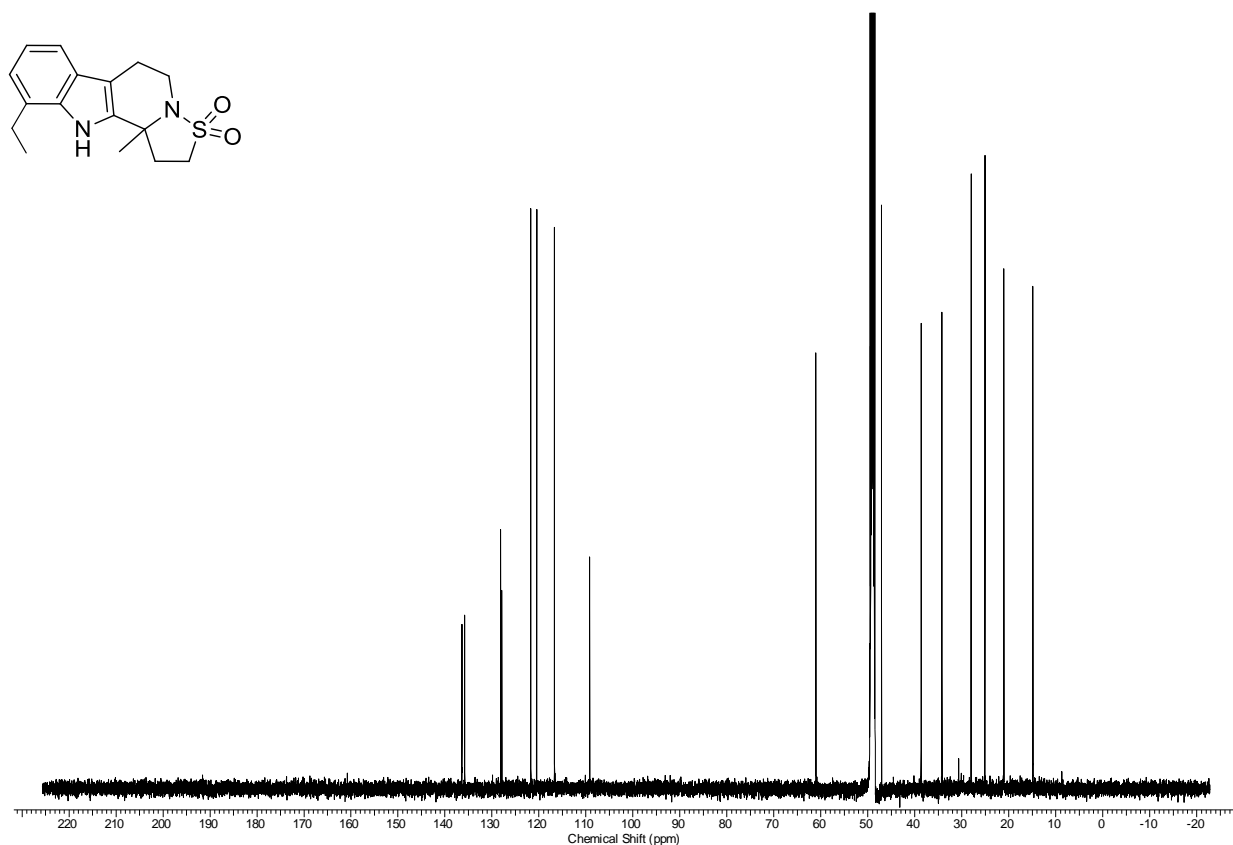

### 3.3. Amide starting material

#### 3.3.1. <sup>1</sup>H NMR spectra for *N*-[2-(1*H*-indol-3-yl)ethyl]hex-5-ynamide 9a

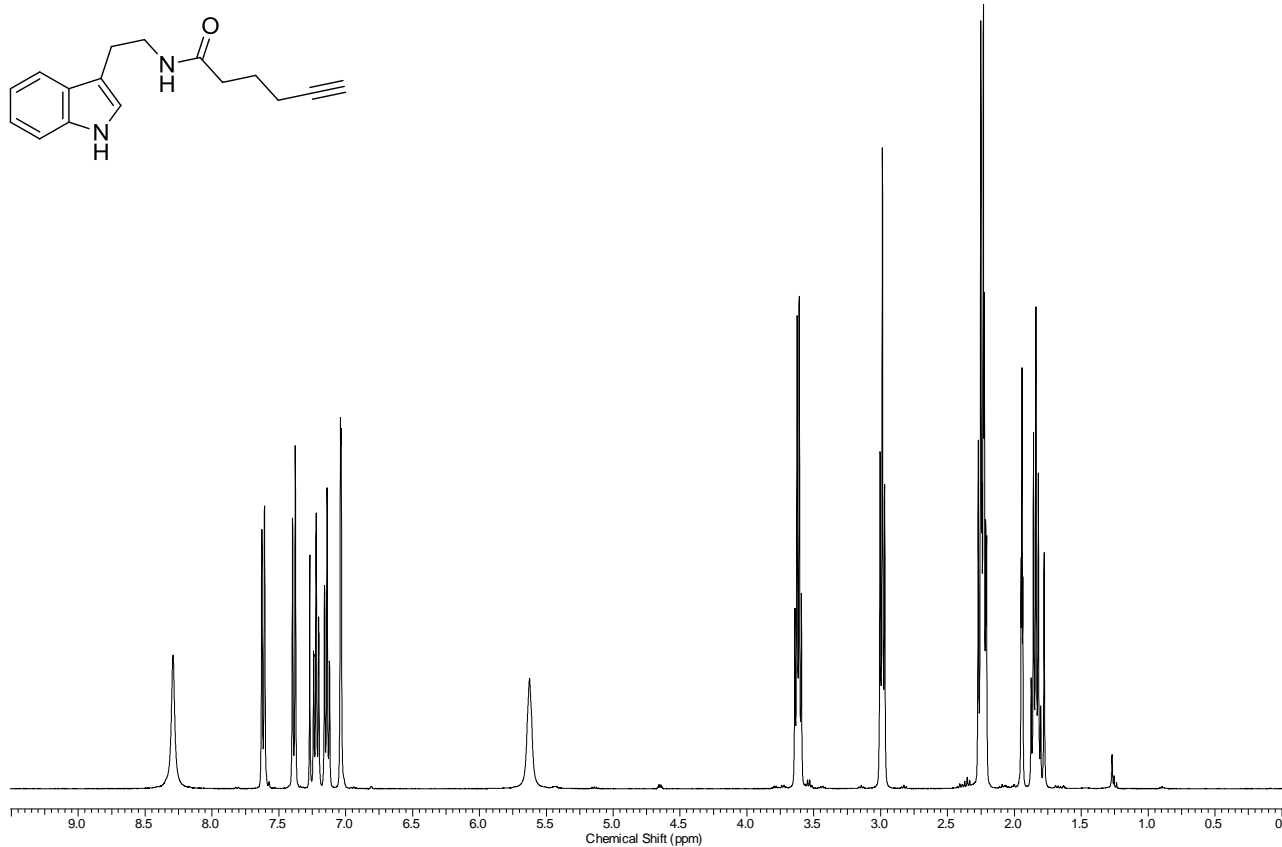

#### 3.3.2. <sup>13</sup>C NMR spectra for *N*-[2-(1*H*-indol-3-yl)ethyl]hex-5-ynamide 9a

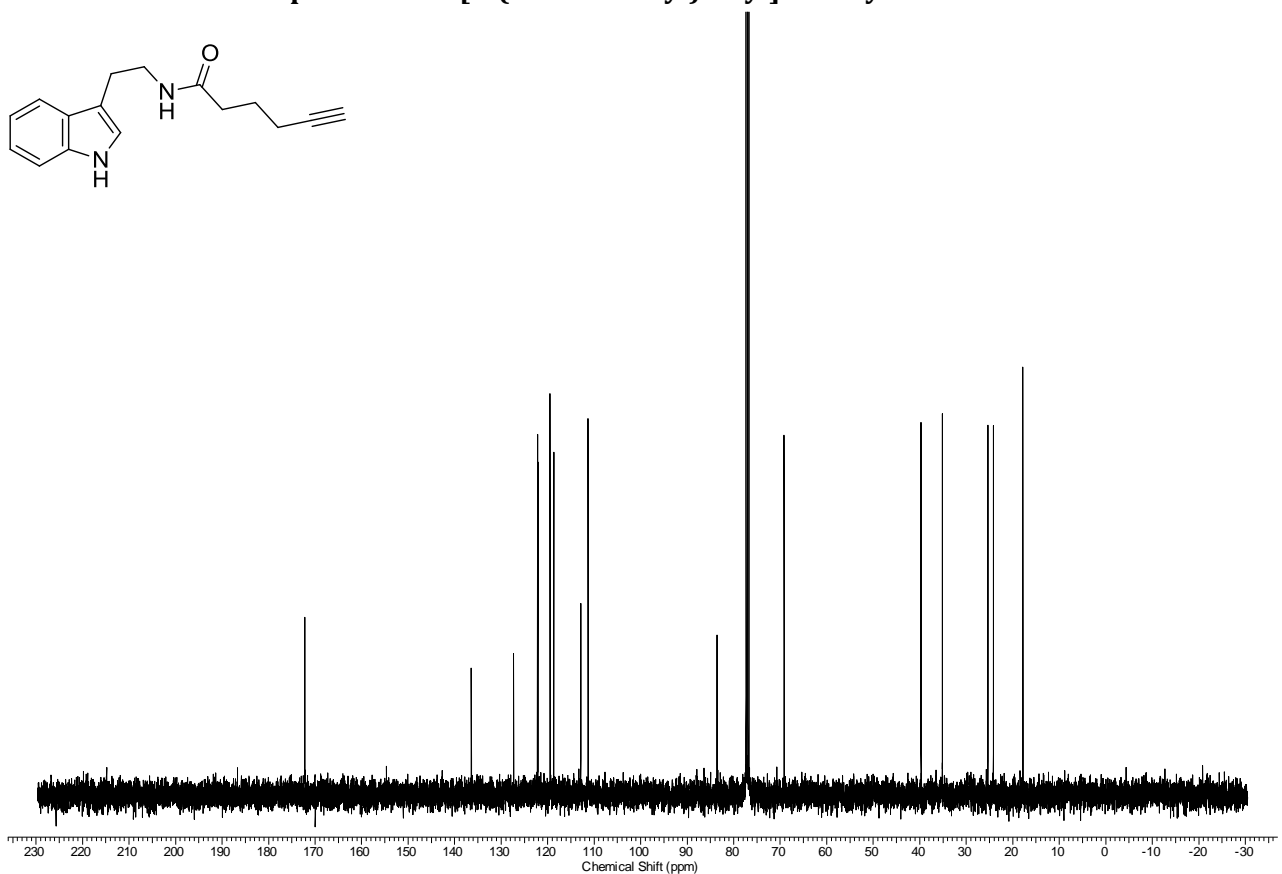

### 3.3.3. <sup>1</sup>H NMR spectra for *N*-[2-(7-bromo-1*H*-indol-3-yl)ethyl]hex-5-ynamide 9b

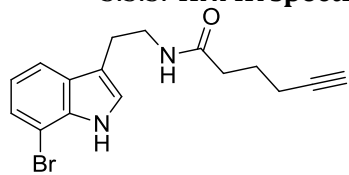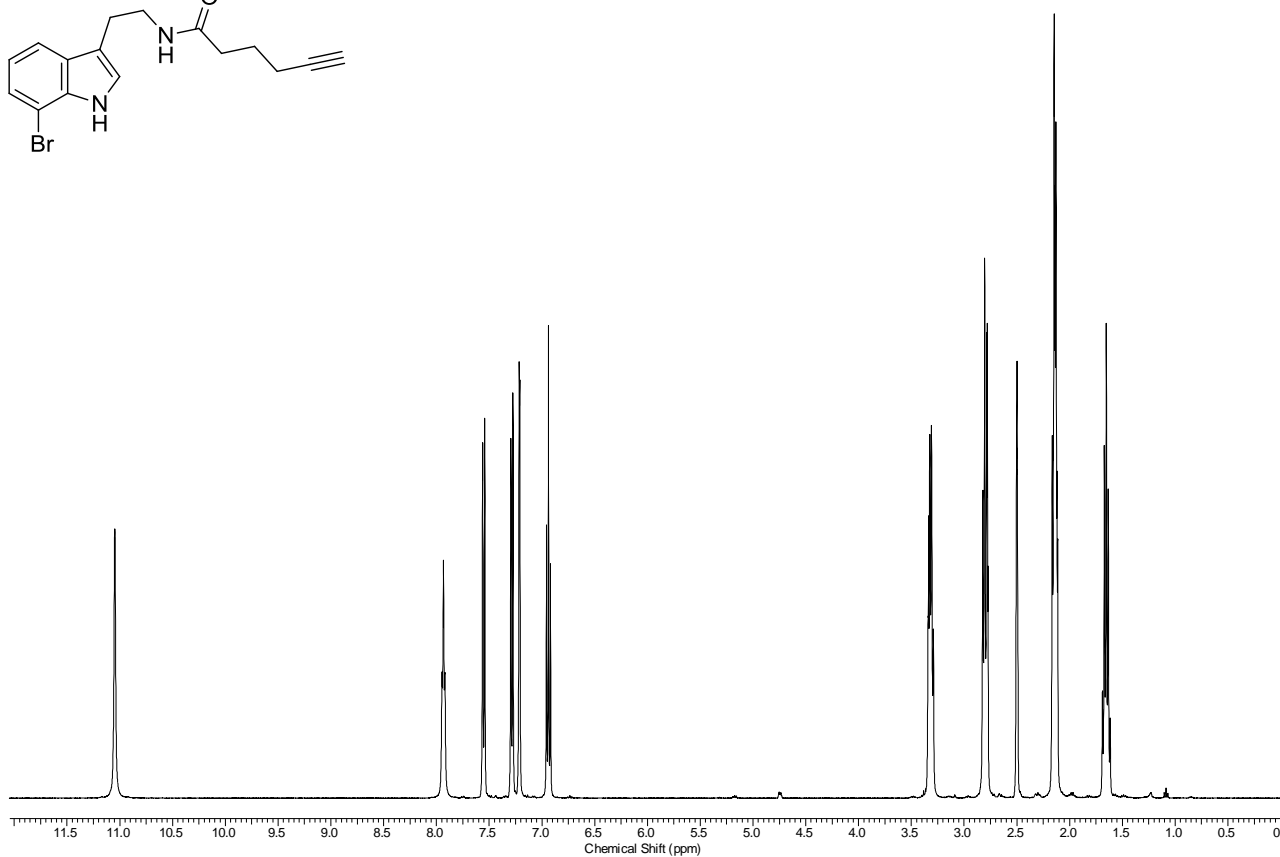

### 3.3.4. <sup>13</sup>C NMR spectra for *N*-[2-(7-bromo-1*H*-indol-3-yl)ethyl]hex-5-ynamide 9b

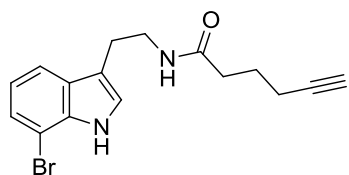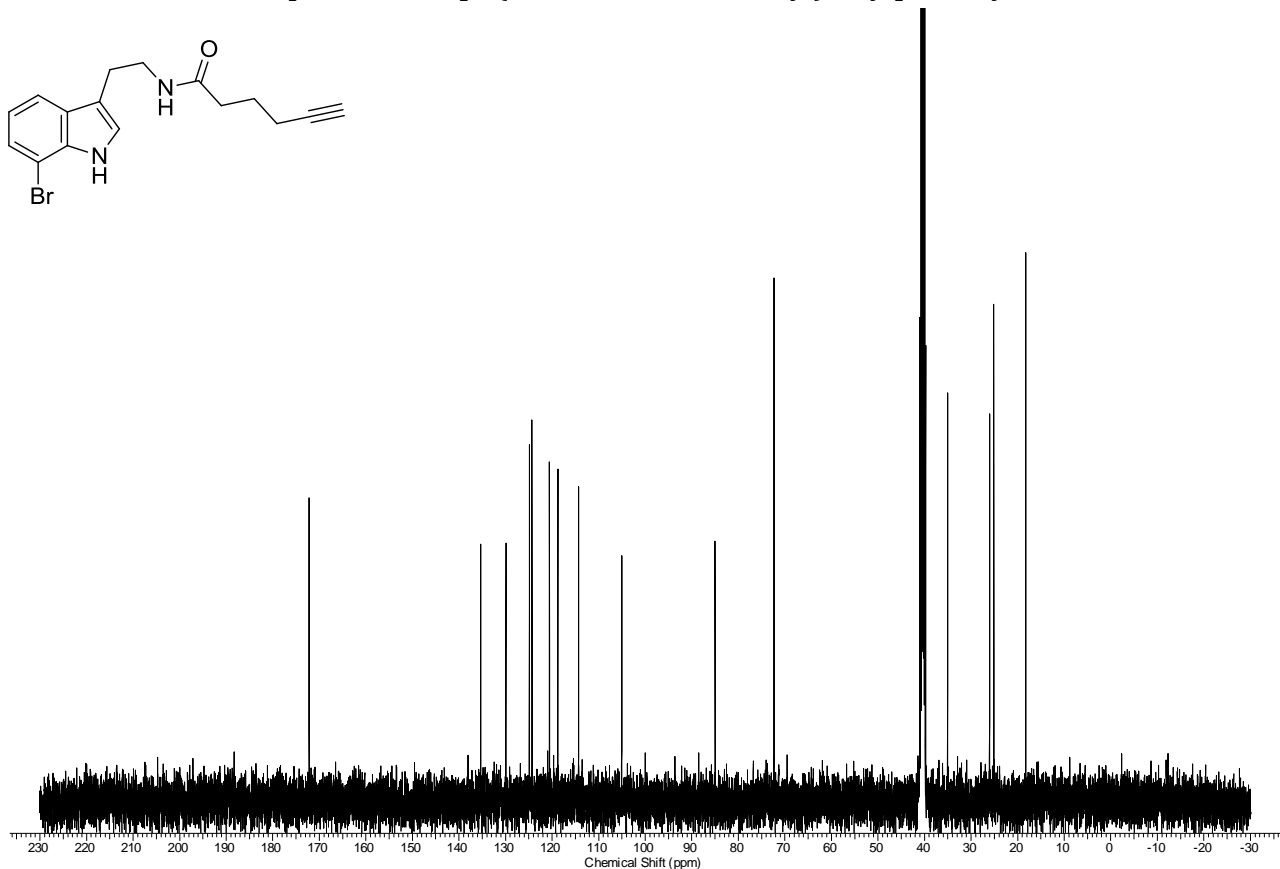



### 3.3.5. <sup>1</sup>H NMR spectra for *N*-[2-(7-methyl-1*H*-indol-3-yl)ethyl]hex-5-ynamide **9c**

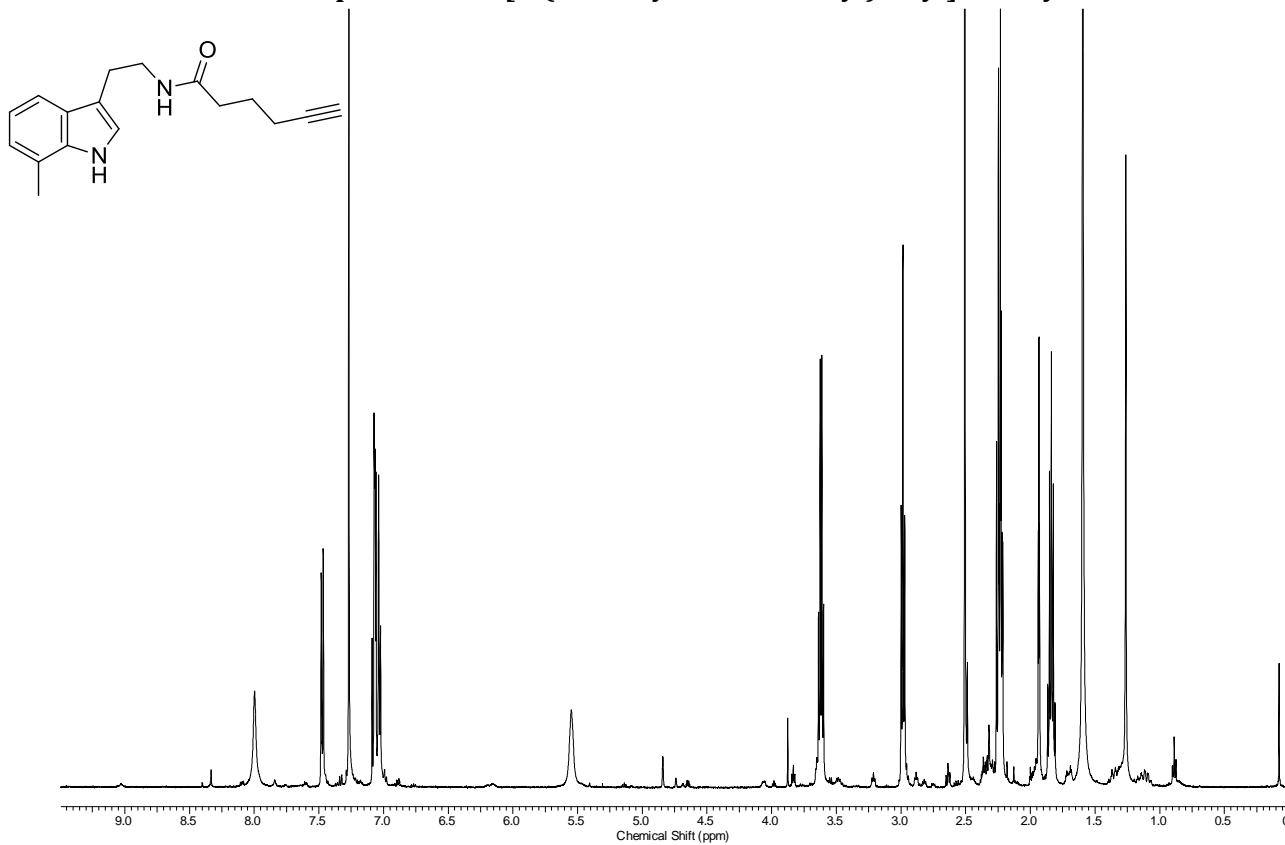

### 3.3.6. <sup>13</sup>C NMR spectra for *N*-[2-(7-methyl-1*H*-indol-3-yl)ethyl]hex-5-ynamide **9c**

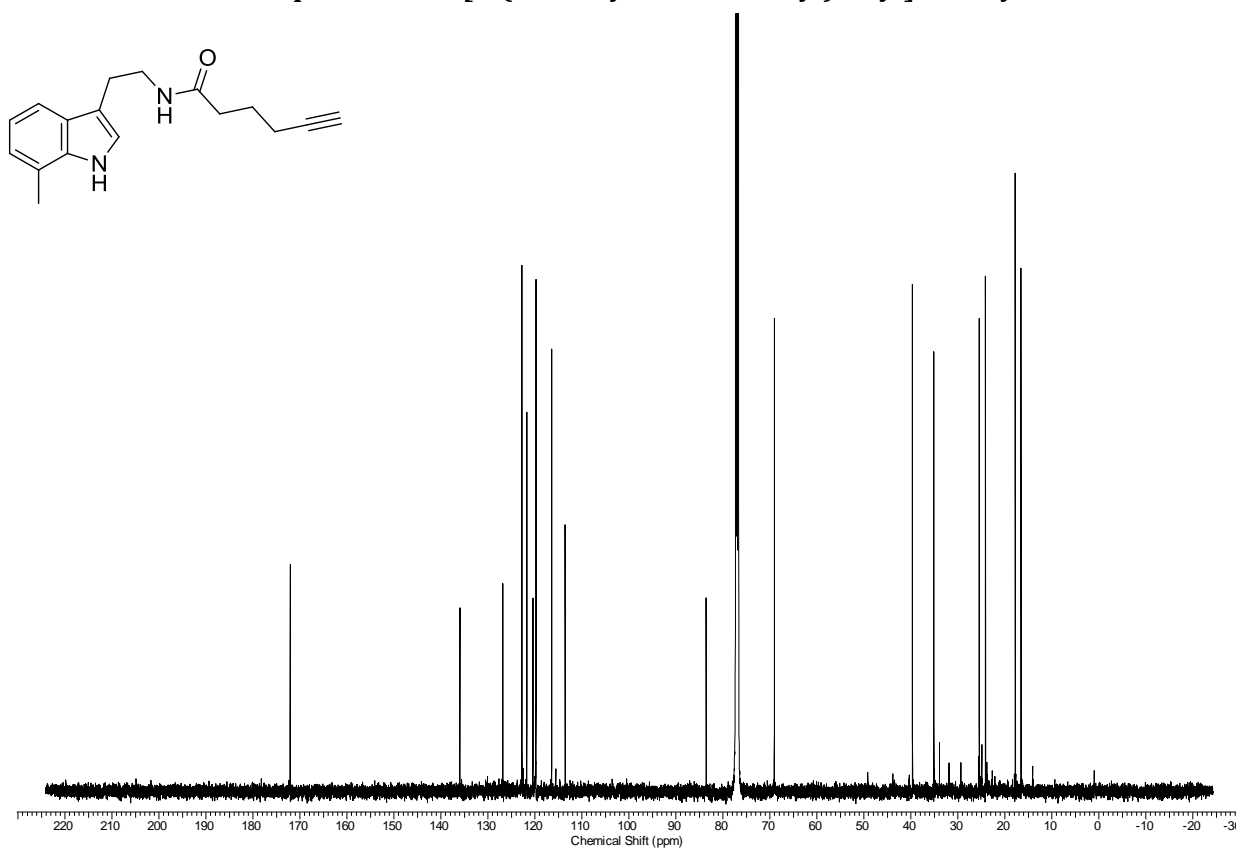

### 3.3.7. <sup>1</sup>H NMR spectra for *N*-[2-(7-ethyl-1*H*-indol-3-yl)ethyl]hex-5-ynamide 9d

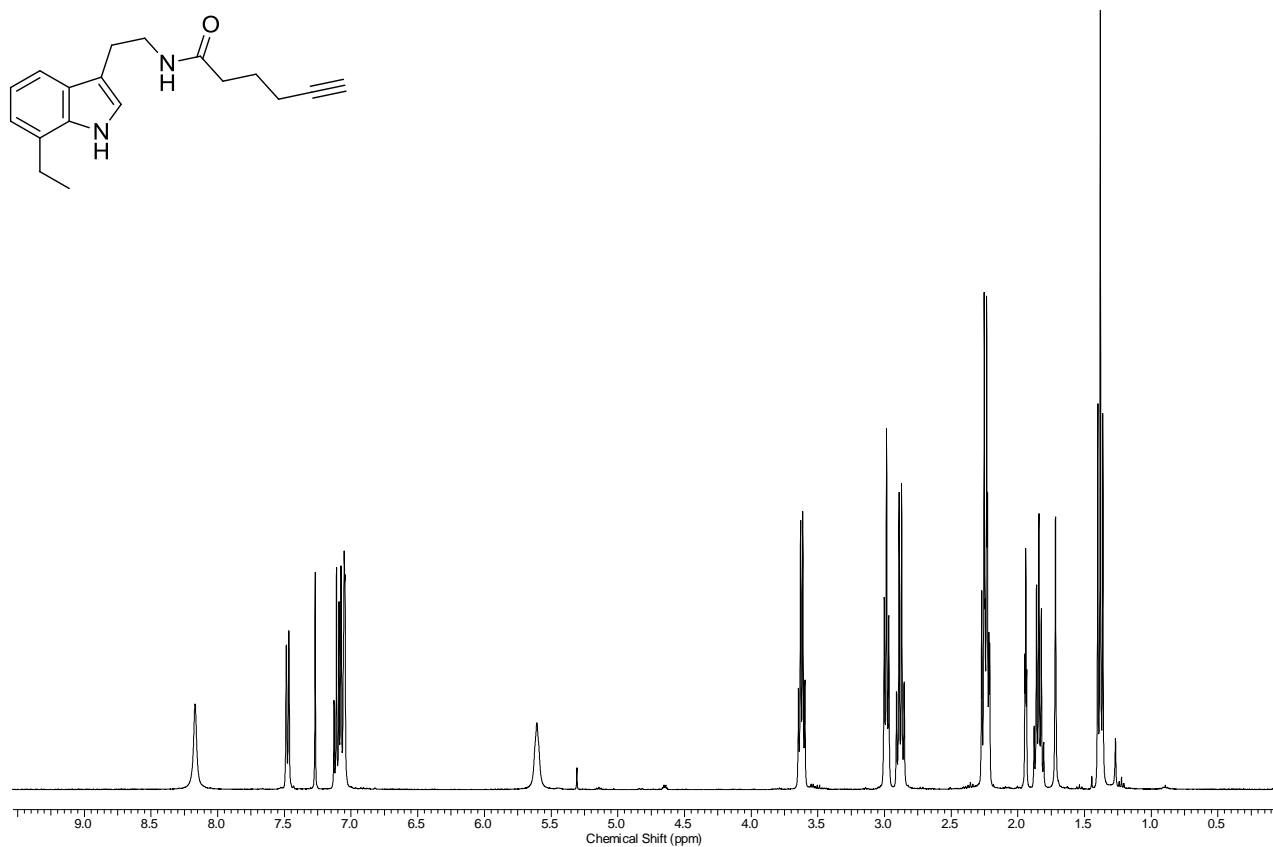

### 3.3.8. <sup>13</sup>C NMR spectra for *N*-[2-(7-ethyl-1*H*-indol-3-yl)ethyl]hex-5-ynamide 9d

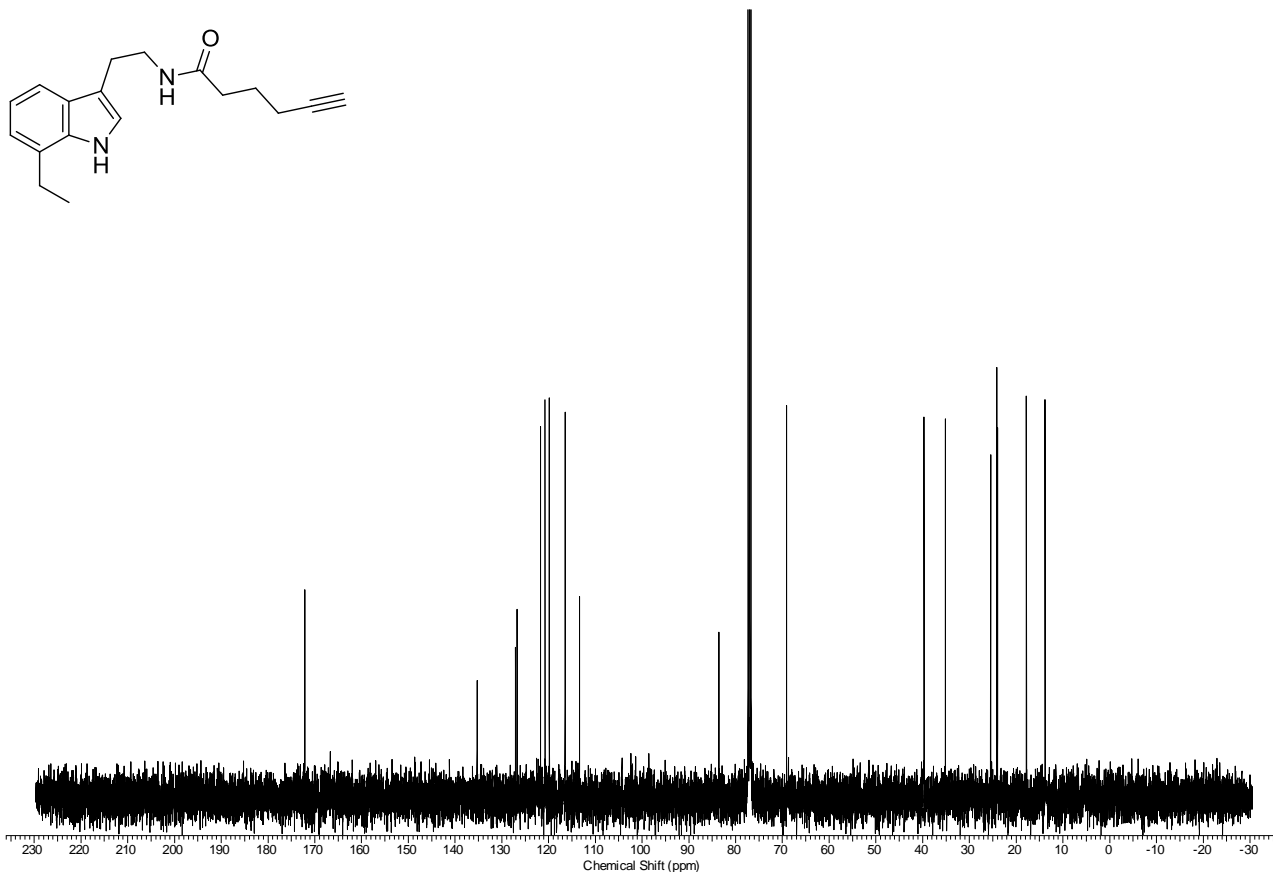

### 3.4. Amide cyclization products

#### 3.4.1. <sup>1</sup>H NMR spectra for 12b-methyl-2,3,6,7,12,12b-hexahydroindolo[2,3-a]quinolizin-4(1H)-one 10a

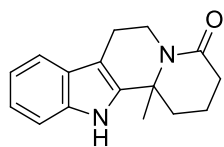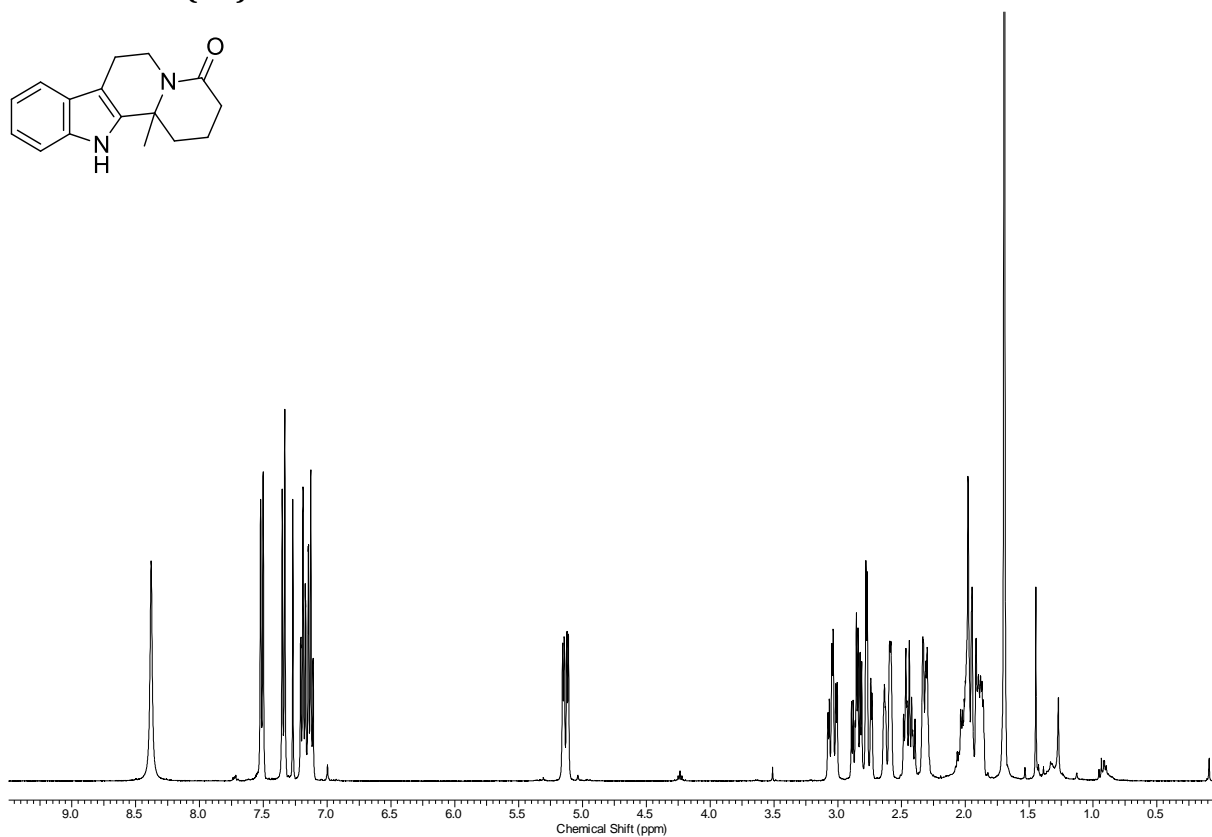

#### 3.4.2. <sup>13</sup>C NMR spectra for 12b-methyl-2,3,6,7,12,12b-hexahydroindolo[2,3-a]quinolizin-4(1H)-one 10a

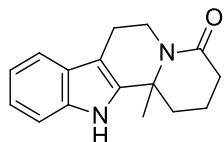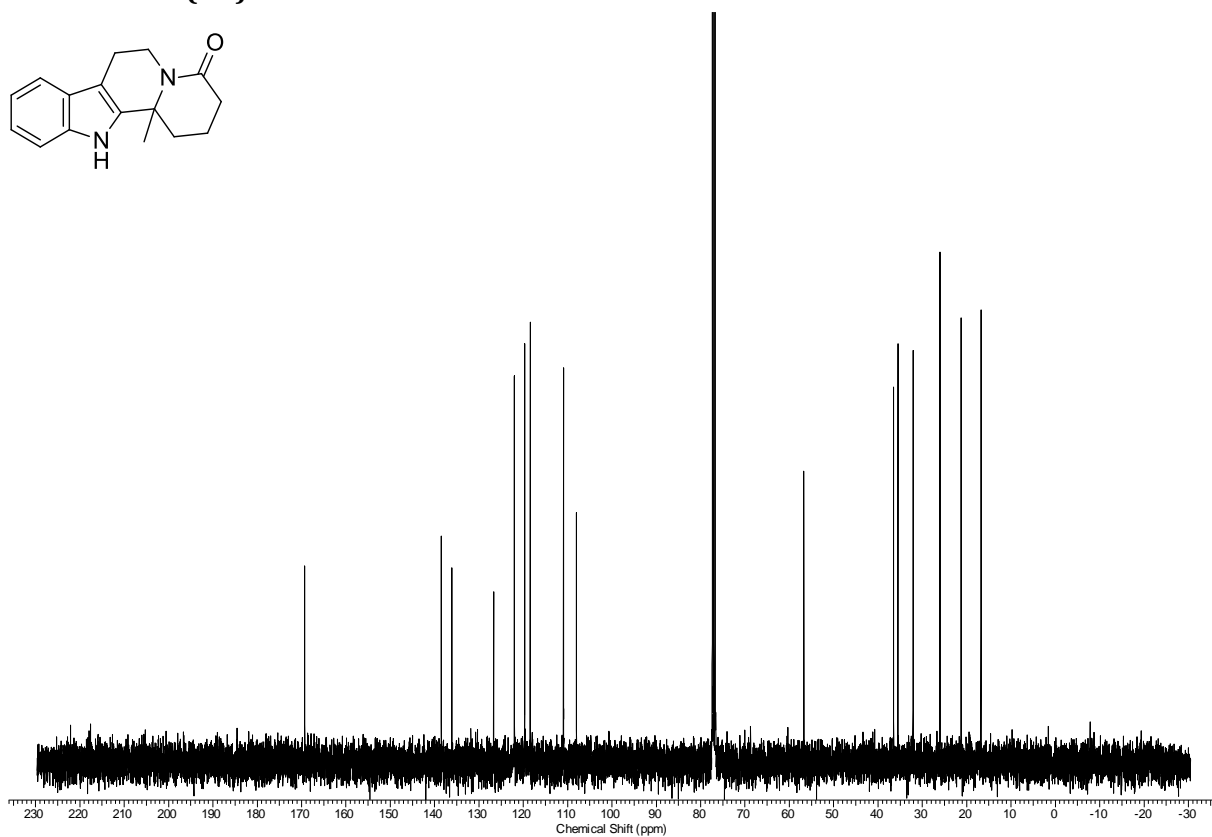

3.4.3. <sup>1</sup>H NMR spectra for 11-bromo-12b-methyl-2,3,6,7,12,12b-hexahydroindolo[2,3-*a*]quinolizin-4(1*H*)-one 10b

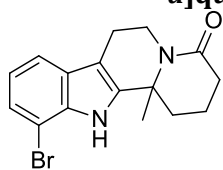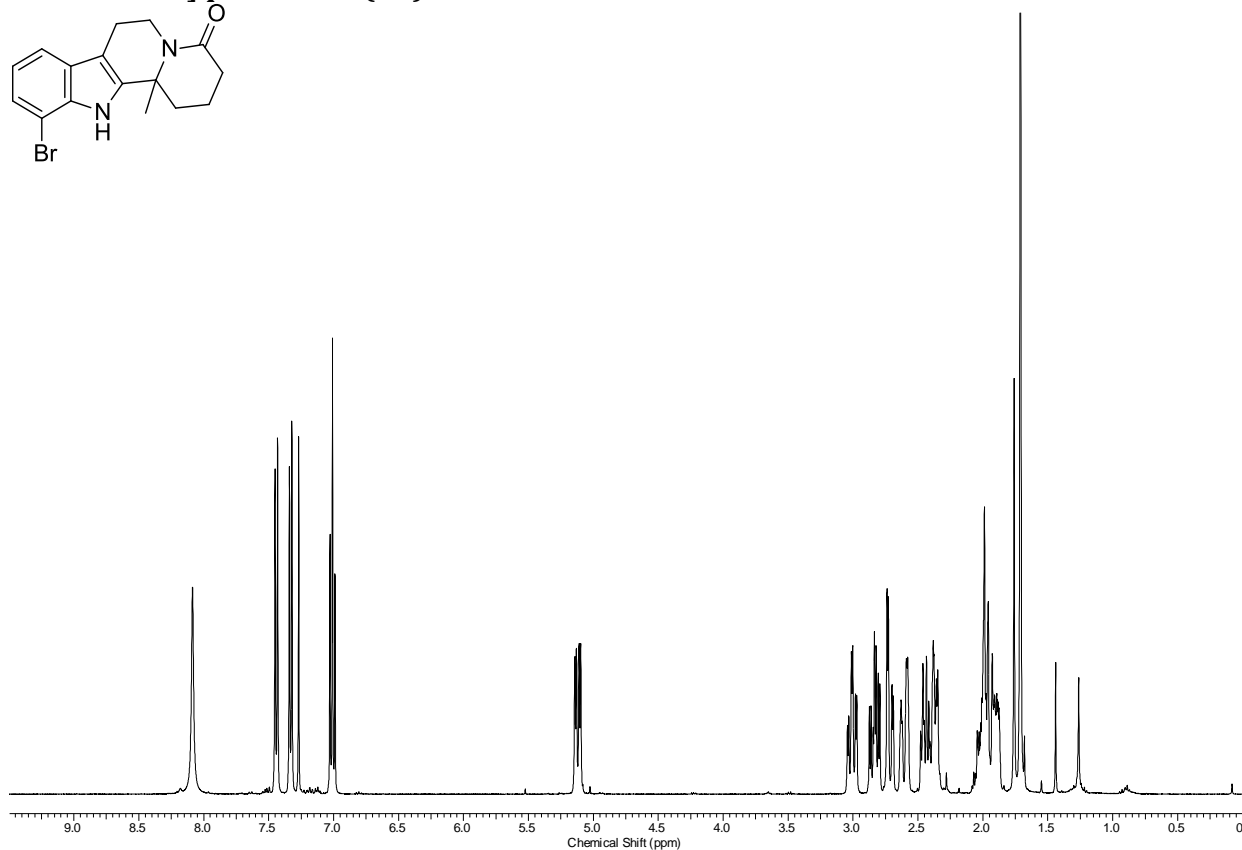

3.4.4. <sup>13</sup>C NMR spectra for 11-bromo-12b-methyl-2,3,6,7,12,12b-hexahydroindolo[2,3-*a*]quinolizin-4(1*H*)-one 10b

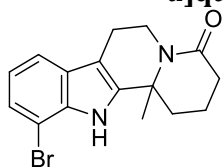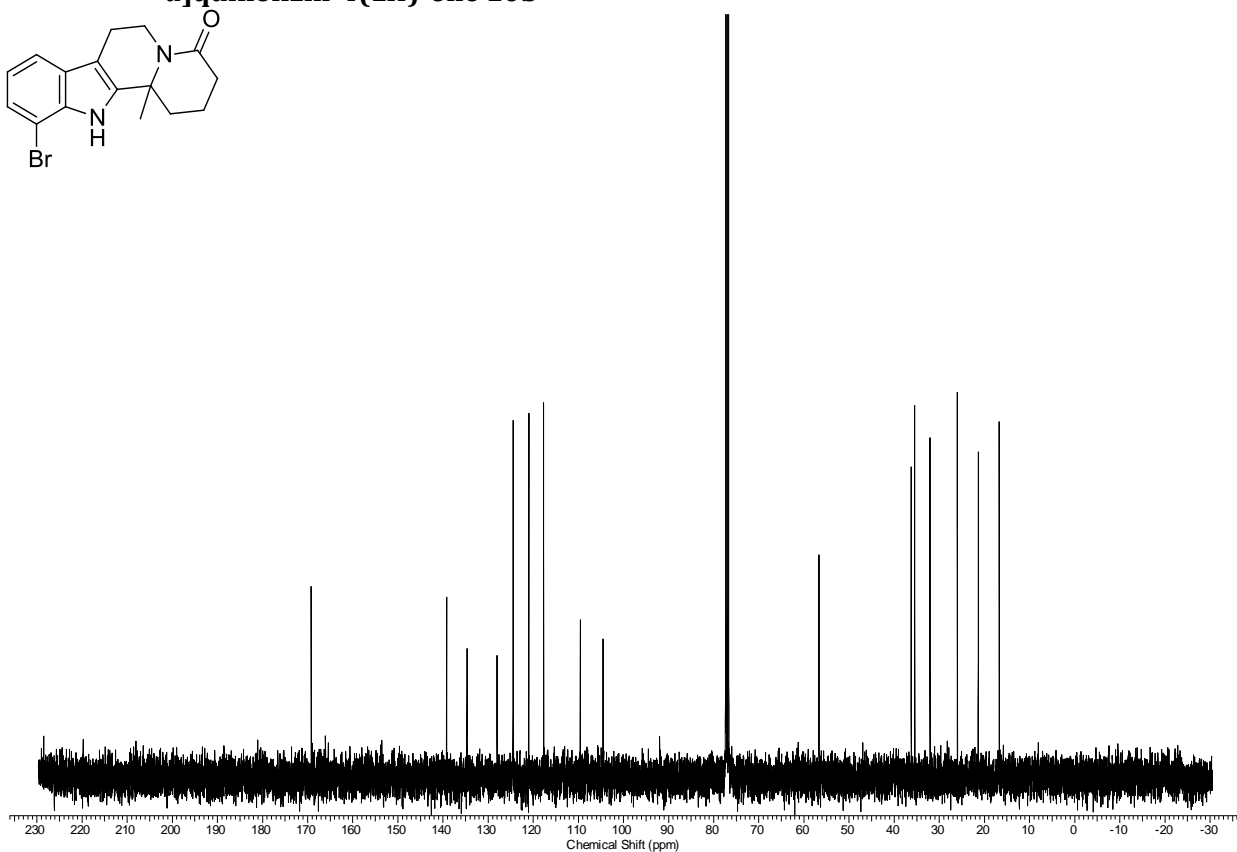

3.4.5. <sup>1</sup>H NMR spectra for 11,12b-dimethyl-2,3,6,7,12,12b-hexahydroindolo[2,3-a]quinolizin-4(1H)-one 10c

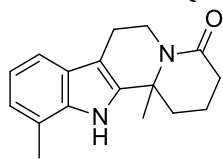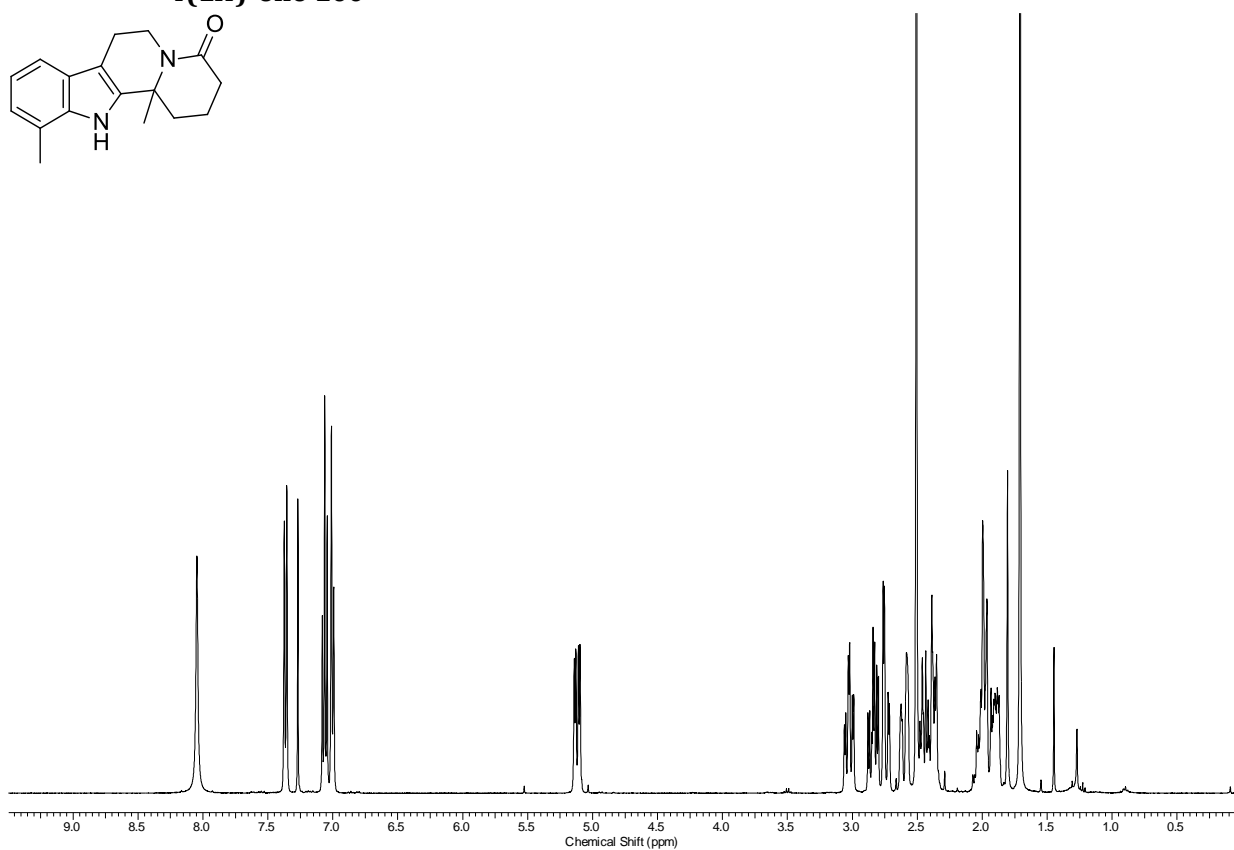

3.4.6. <sup>13</sup>C NMR spectra for 11,12b-dimethyl-2,3,6,7,12,12b-hexahydroindolo[2,3-a]quinolizin-4(1H)-one 10c

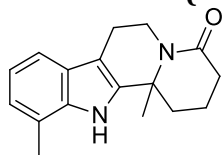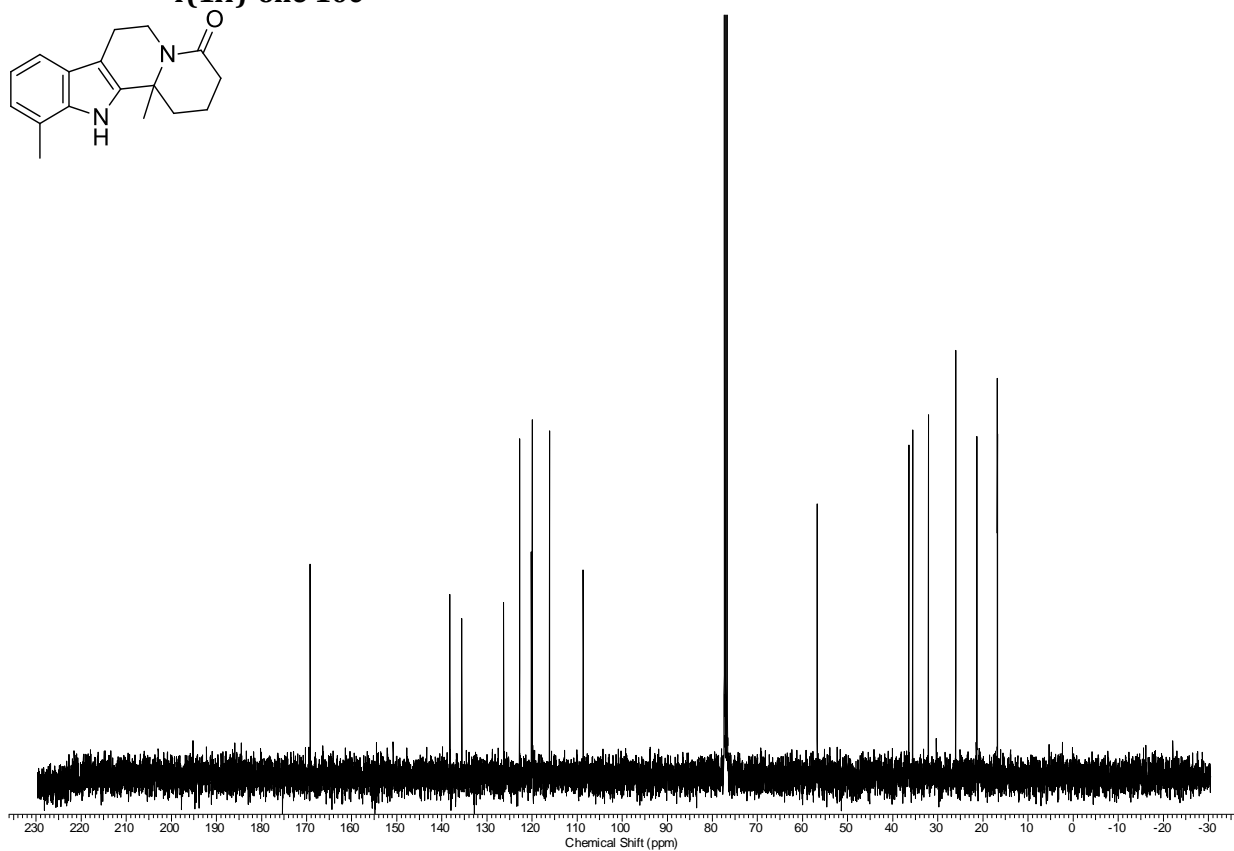

3.4.7. <sup>1</sup>H NMR spectra for 11-ethyl-12b-methyl-2,3,6,7,12,12b-hexahydroindolo[2,3-*a*]quinolizin-4(1*H*)-one 10d

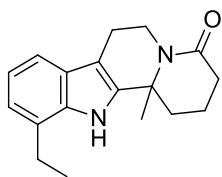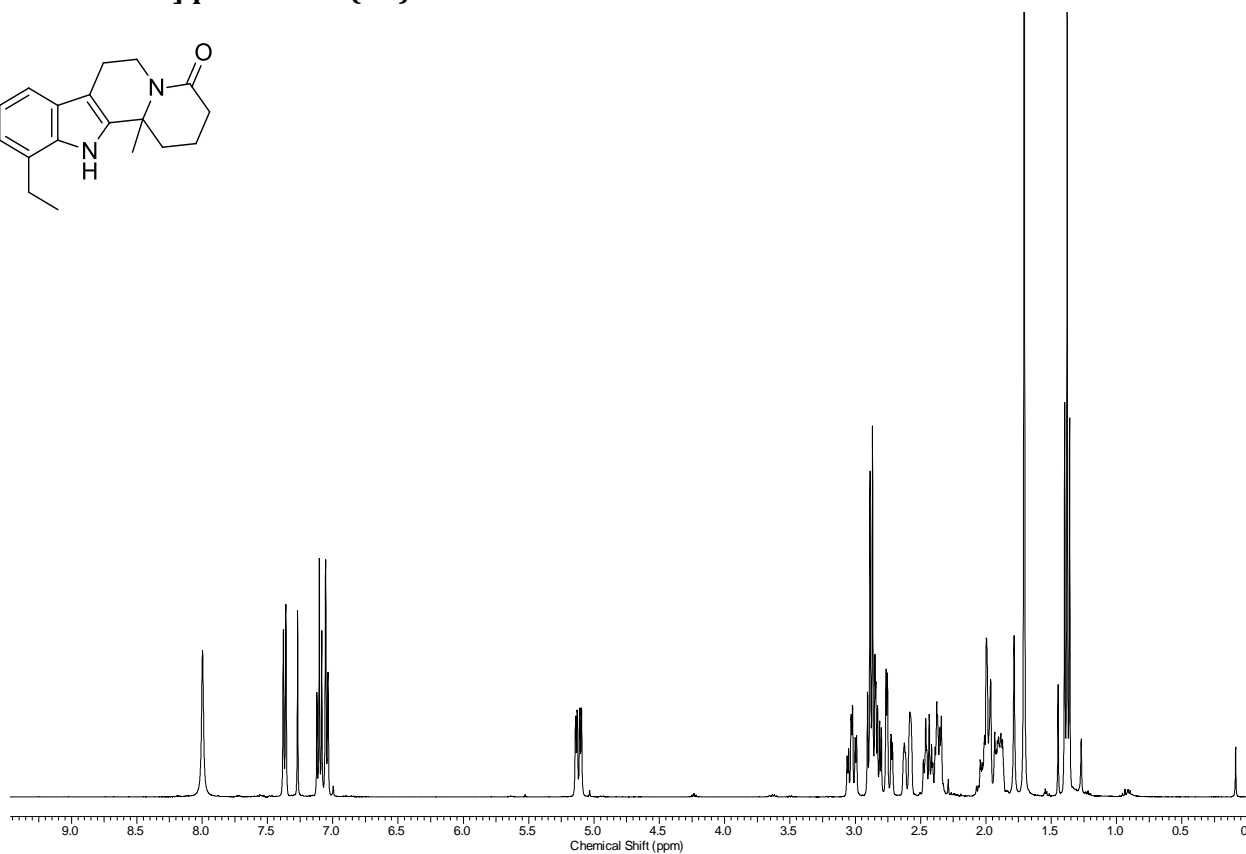

3.4.8. <sup>13</sup>C NMR spectra for 11-ethyl-12b-methyl-2,3,6,7,12,12b-hexahydroindolo[2,3-*a*]quinolizin-4(1*H*)-one 10d

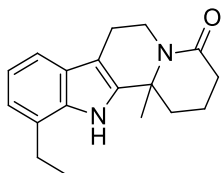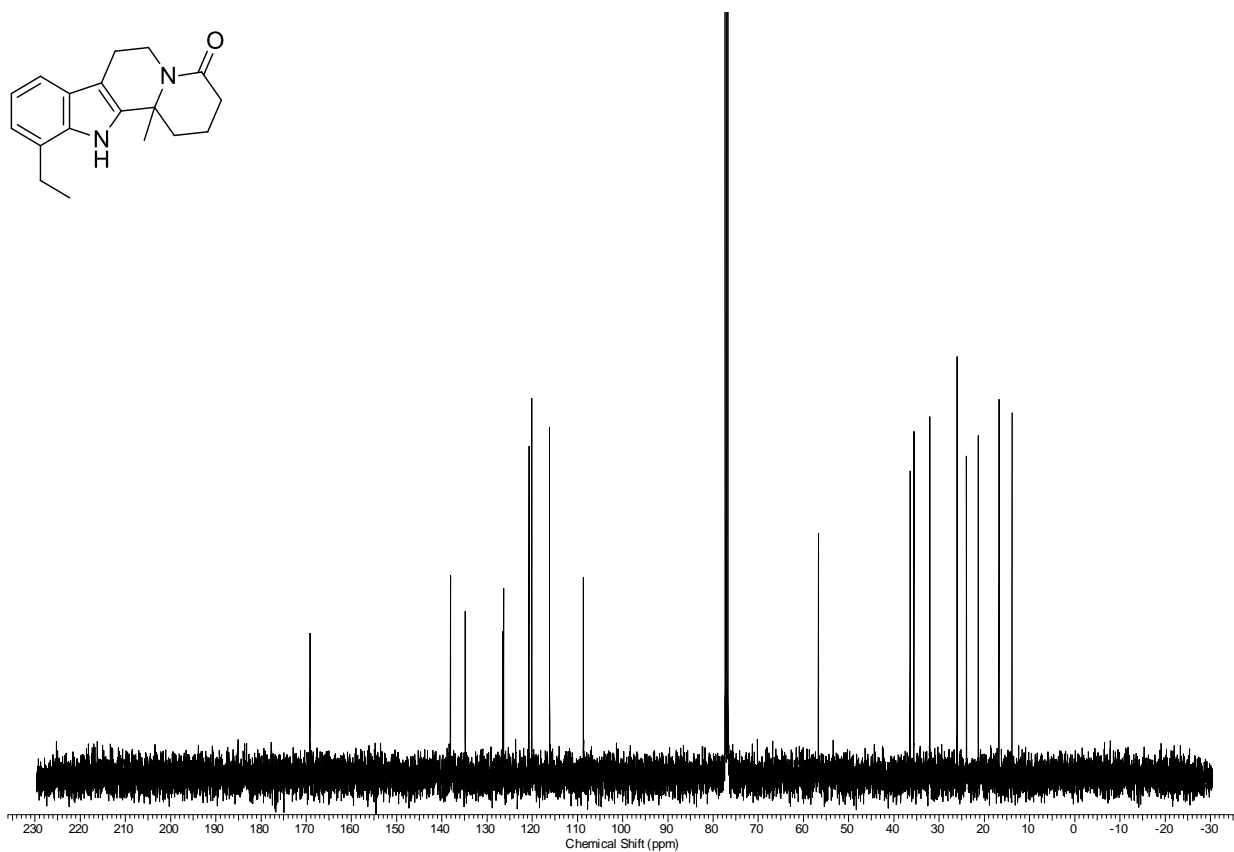

### 3.4.9. <sup>1</sup>H NMR spectra for *N*-[2-(1H-indole-3-yl)ethyl]-3-oxobutane-1-sulfonamide 14

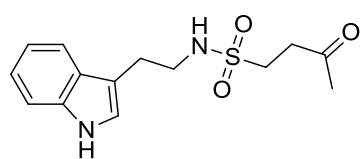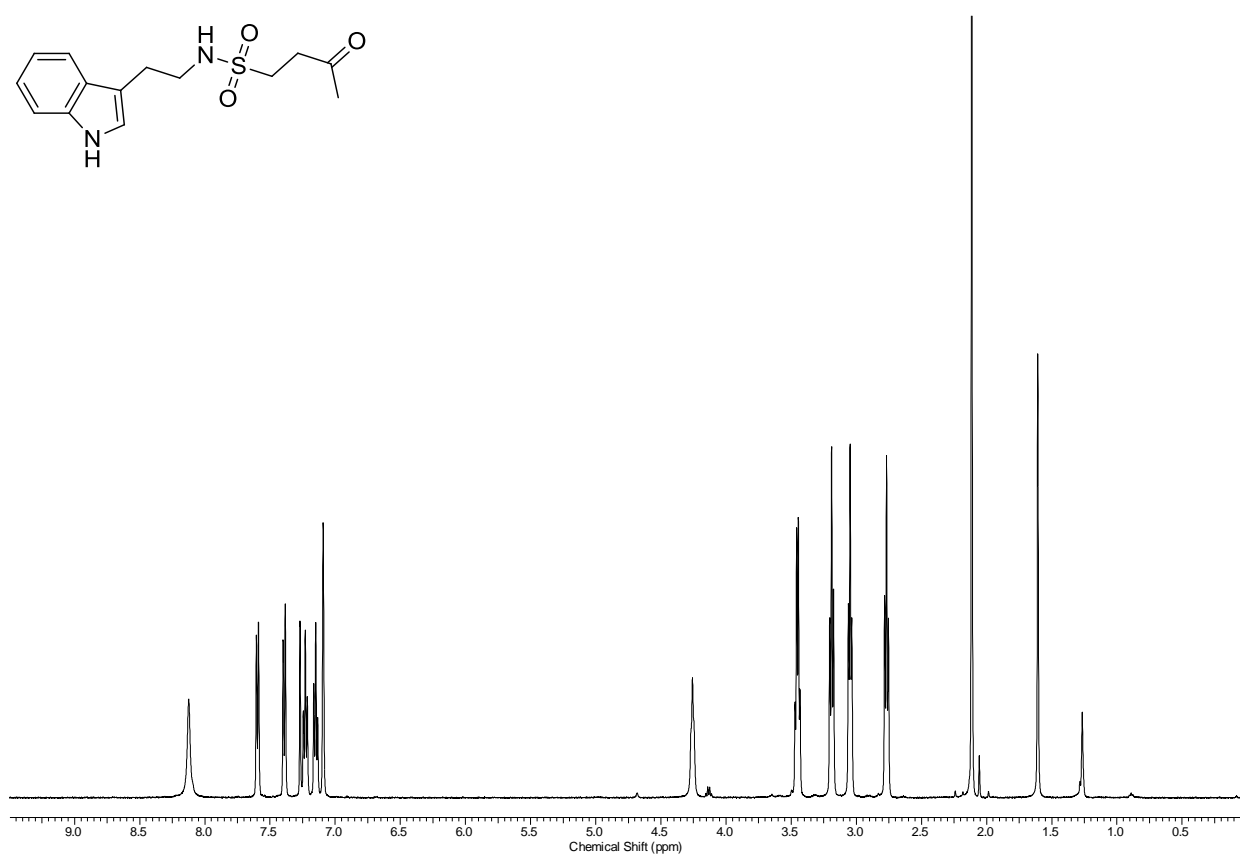

### 3.4.10. <sup>13</sup>C NMR spectra for *N*-[2-(1H-indole-3-yl)ethyl]-3-oxobutane-1-sulfonamide 14

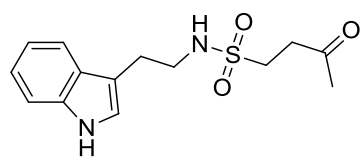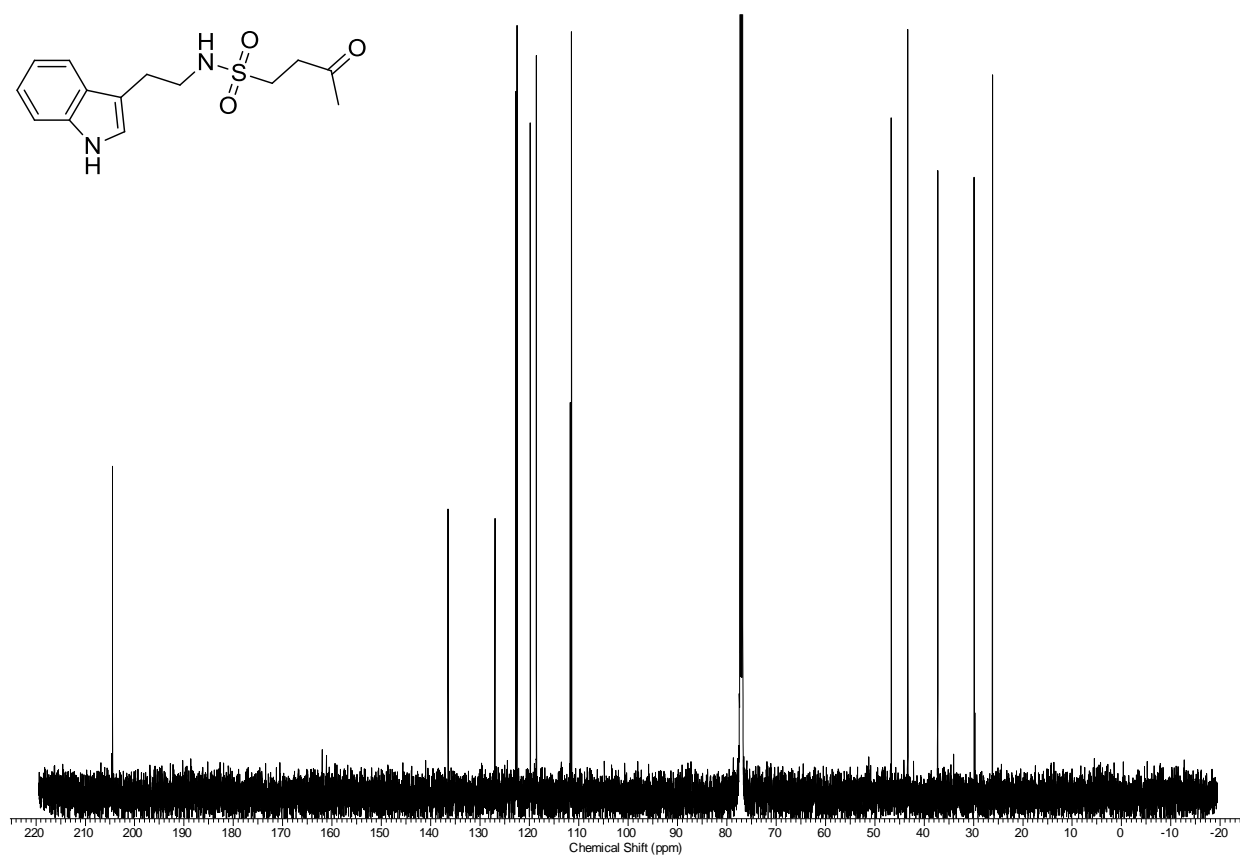

3.4.11. <sup>1</sup>HNMR spectra for 11-(3-bromobenzyl)-11b-methyl-1,2,5,6,11,11b-hexahydro[1,2]thiazolo[2',3':1,2]pyrido[3,4-b]indole 3,3-dioxide 15a

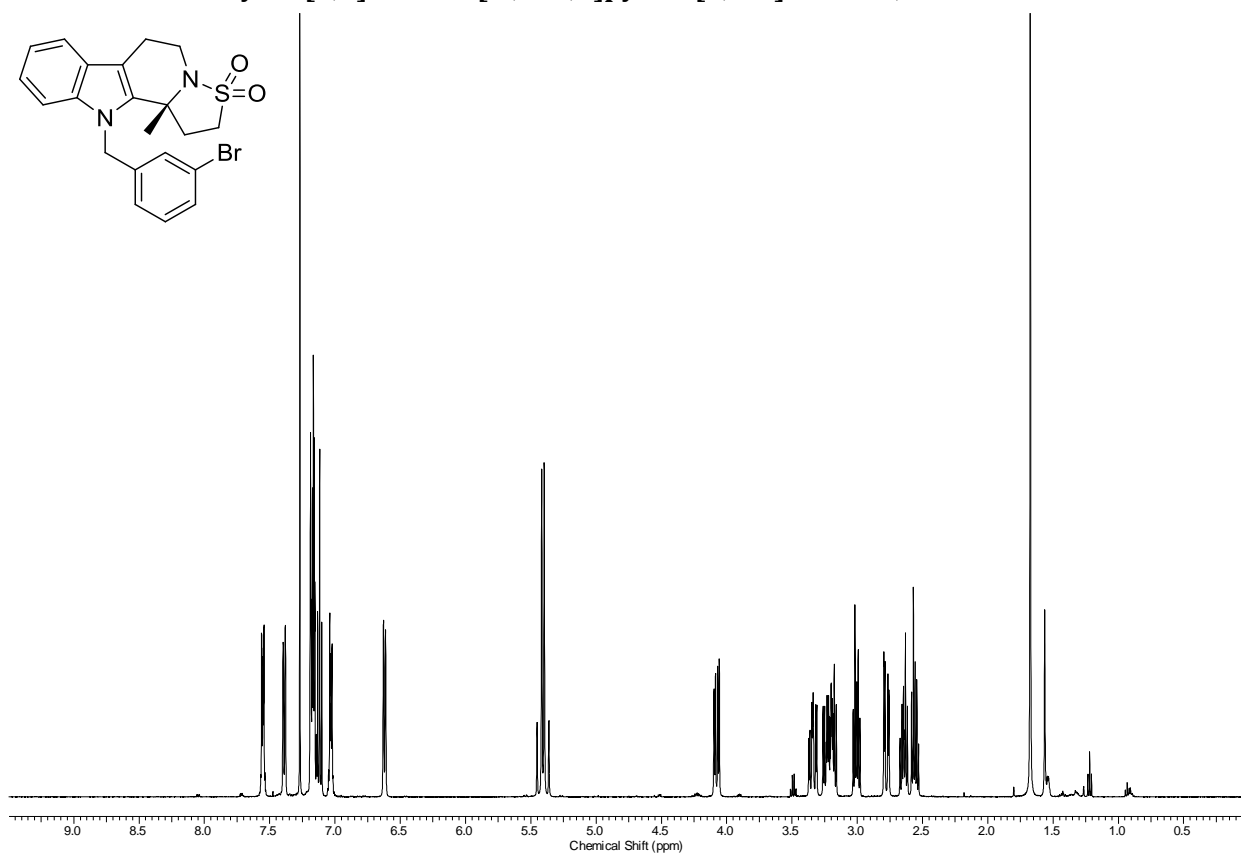

3.4.12. <sup>1</sup>HNMR spectra for 11-(3-bromobenzyl)-11b-methyl-1,2,5,6,11,11b-hexahydro[1,2]thiazolo[2',3':1,2]pyrido[3,4-b]indole 3,3-dioxide 15a

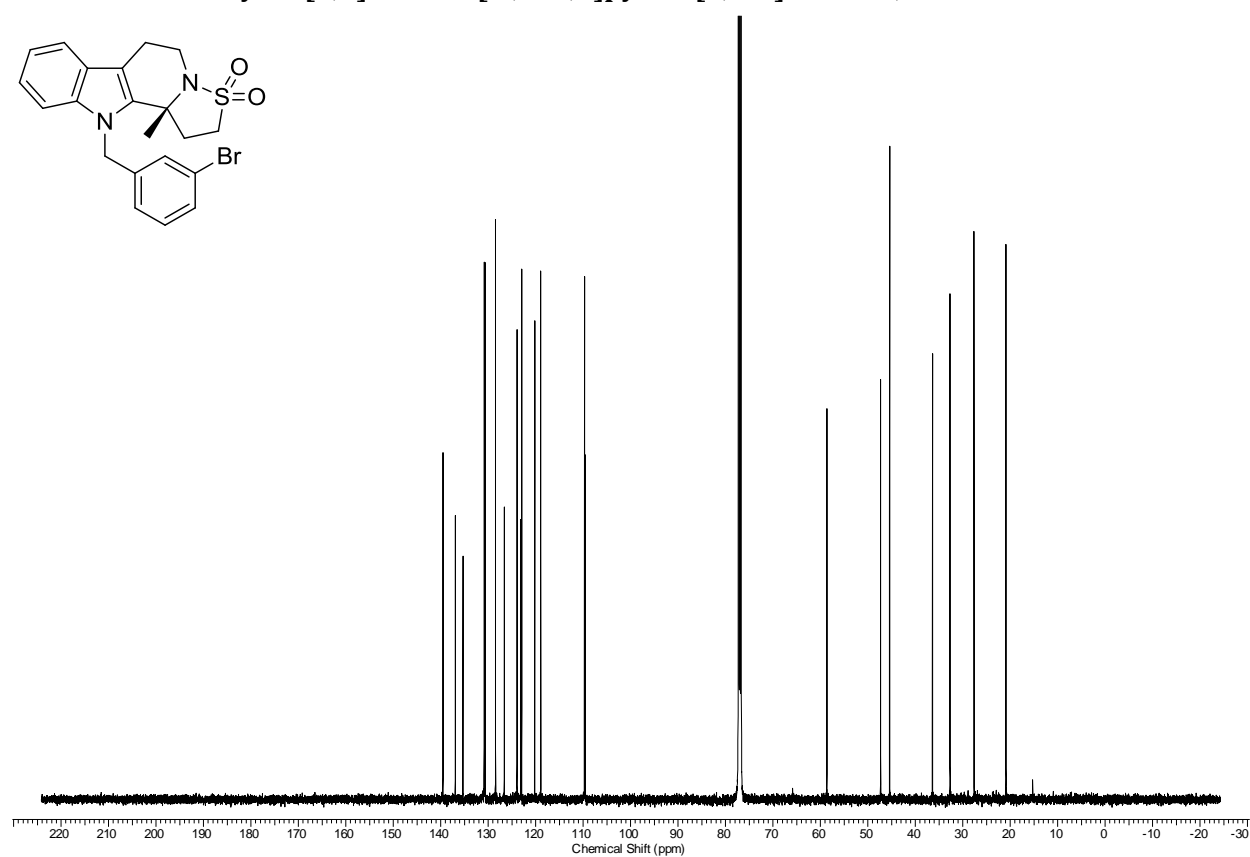



## 4. HPLC reports

### 4.1. Sulfonamide cyclization products

#### 4.1.1. HPLC trace of racemic 11b-methyl-1,2,5,6,11,11b-hexahydroisothiazolo[2',3':1,2]pyrido[3,4-b]indole 3,3-dioxide 6a

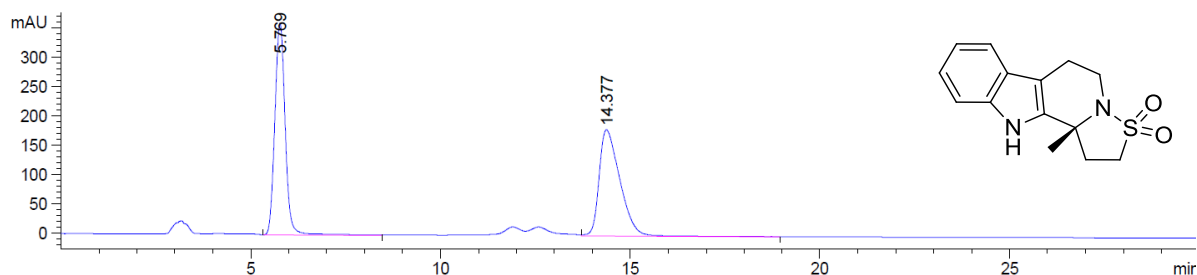

Signal 2: DAD1 B, Sig=220,16 Ref=360,100

| Peak # | RetTime [min] | Type | Width [min] | Area [mAU*s] | Height [mAU] | Area %  |
|--------|---------------|------|-------------|--------------|--------------|---------|
| 1      | 5.769         | VV   | 0.2996      | 6929.40234   | 361.55801    | 49.9763 |
| 2      | 14.377        | VB   | 0.5818      | 6935.96973   | 181.50195    | 50.0237 |

Totals : 1.38654e4 543.05997

#### 4.1.2. HPLC trace of 11b-methyl-1,2,5,6,11,11b-hexahydroisothiazolo[2',3':1,2]pyrido[3,4-b]indole 3,3-dioxide 6a

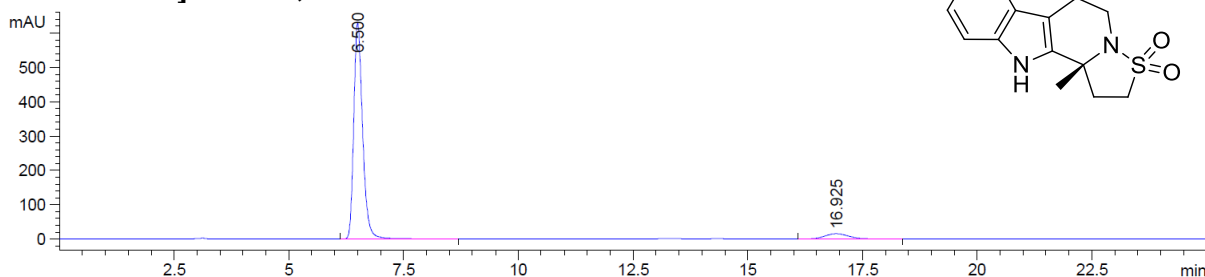

Signal 2: DAD1 B, Sig=220,8 Ref=360,100

| Peak # | RetTime [min] | Type | Width [min] | Area [mAU*s] | Height [mAU] | Area %  |
|--------|---------------|------|-------------|--------------|--------------|---------|
| 1      | 6.500         | BB   | 0.2088      | 8450.49805   | 628.89789    | 93.7254 |
| 2      | 16.925        | BB   | 0.5624      | 565.73688    | 15.62640     | 6.2746  |

Totals : 9016.23492 644.52429

4.1.3.HPLC trace of 11b-methyl-1,2,5,6,11,11b-hexahydroisothiazolo[2',3':1,2]pyrido[3,4-b]indole 3,3-dioxide fom ketone starting material 6a

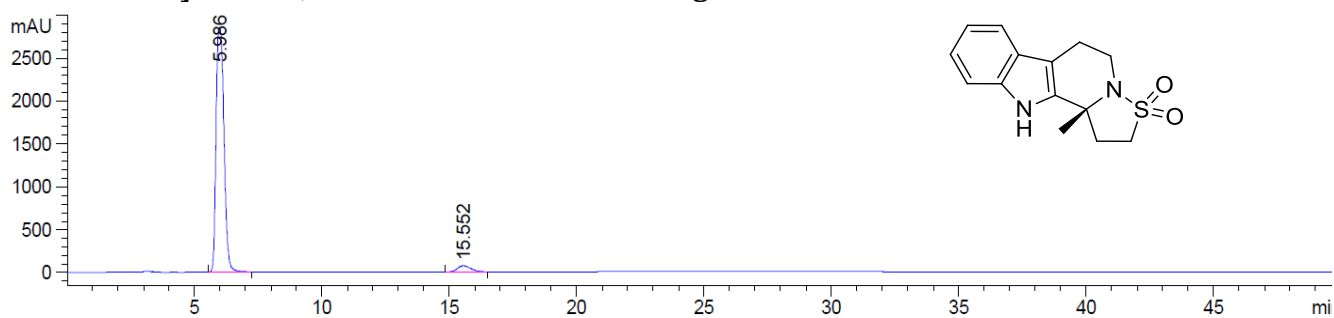

Signal 3: DAD1 C, Sig=220,8 Ref=360,100

| Peak # | RetTime [min] | Type | Width [min] | Area [mAU*s] | Height [mAU] | Area %  |
|--------|---------------|------|-------------|--------------|--------------|---------|
| 1      | 5.986         | BB   | 0.3429      | 6.13641e4    | 2853.56030   | 95.9480 |
| 2      | 15.552        | BB   | 0.5588      | 2591.48804   | 71.51179     | 4.0520  |

Totals : 6.39556e4 2925.07209

4.1.4.HPLC trace of Racemic 7-chloro-11b-methyl-1,2,5,6,11,11b-hexahydro[1,2]thiazolo[2',3':1,2]pyrido[3,4-b]indole 3,3-dioxide 6b

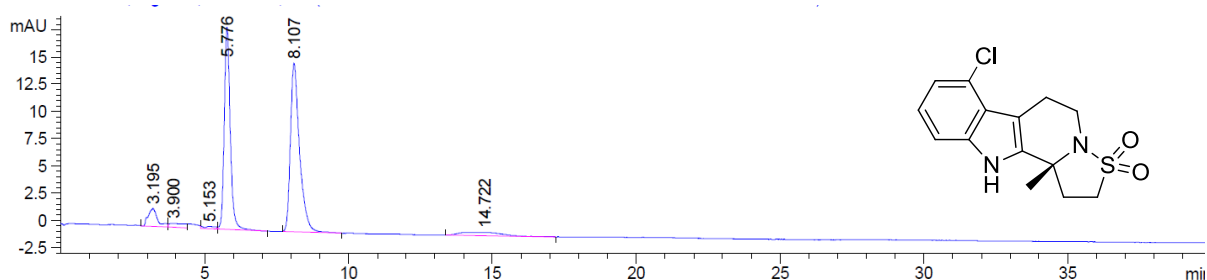

Signal 2: DAD1 B, Sig=220,8 Ref=360,100

| Peak # | RetTime [min] | Type | Width [min] | Area [mAU*s] | Height [mAU] | Area %  |
|--------|---------------|------|-------------|--------------|--------------|---------|
| 1      | 5.776         | VV   | 0.2205      | 1610.56543   | 111.51776    | 44.0052 |
| 2      | 8.106         | VV   | 0.3295      | 2049.37549   | 92.85419     | 55.9948 |

Totals : 3659.94092 204.37196

4.1.5.HPLC trace of 7-chloro-11b-methyl-1,2,5,6,11,11b-hexahydro[1,2]thiazolo[2',3':1,2]pyrido[3,4-b]indole 3,3-dioxide 6b

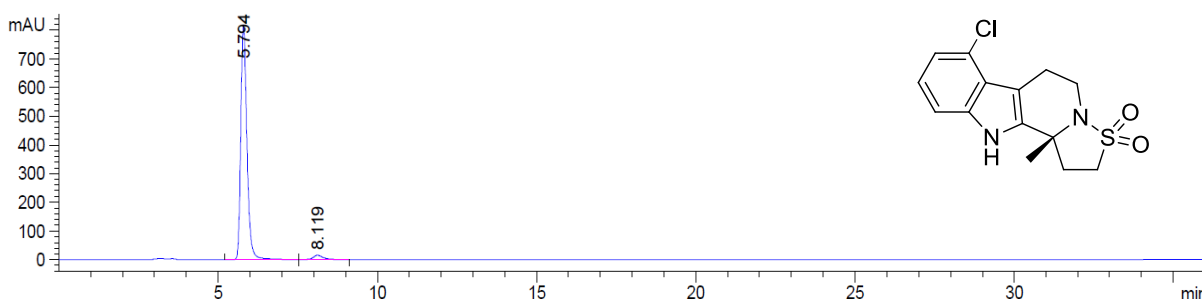

Signal 2: DAD1 B, Sig=220,16 Ref=360,100

| Peak # | RetTime [min] | Type | Width [min] | Area [mAU*s] | Height [mAU] | Area %  |
|--------|---------------|------|-------------|--------------|--------------|---------|
| 1      | 5.792         | BB   | 0.2062      | 1.09271e4    | 816.11572    | 97.4035 |
| 2      | 8.118         | BB   | 0.3032      | 291.29129    | 14.32851     | 2.5965  |

Totals : 1.12184e4 830.44423

4.1.6.HPLC trace of racemic 8-bromo-11b-methyl-1,2,5,6,11,11b-hexahydroisothiazolo[2',3':1,2]pyrido[3,4-b]indole 3,3-dioxide 6c

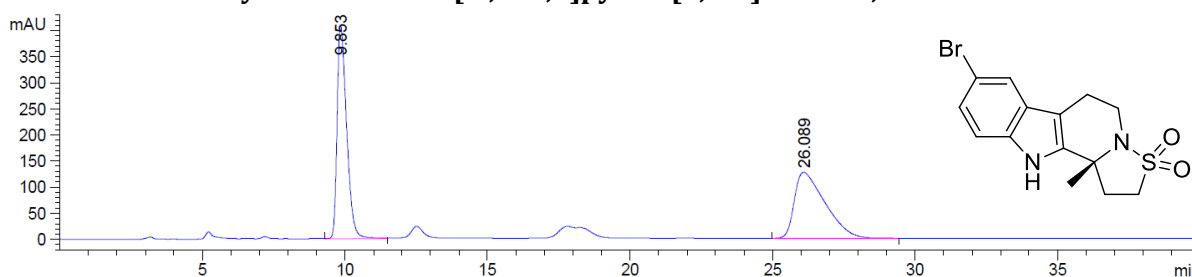

Signal 3: DAD1 C, Sig=220,8 Ref=360,100

| Peak # | RetTime [min] | Type | Width [min] | Area [mAU*s] | Height [mAU] | Area %  |
|--------|---------------|------|-------------|--------------|--------------|---------|
| 1      | 9.853         | VB   | 0.3545      | 9467.04687   | 408.36649    | 50.1600 |
| 2      | 26.089        | BB   | 1.1205      | 9406.65527   | 126.36646    | 49.8400 |

Totals : 1.88737e4 534.73294

4.1.7.HPLC trace 8-bromo-11b-methyl-1,2,5,6,11,11b-hexahydroisothiazolo[2',3':1,2]pyrido[3,4-b]indole 3,3-dioxide 6c

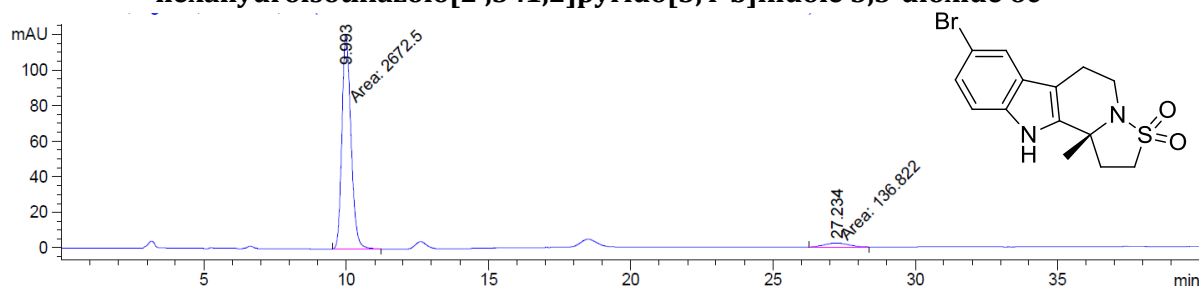

Signal 3: DAD1 C, Sig=220,8 Ref=360,100

| Peak # | RetTime [min] | Type | Width [min] | Area [mAU*s] | Height [mAU] | Area %  |
|--------|---------------|------|-------------|--------------|--------------|---------|
| 1      | 9.993         | MM   | 0.3699      | 2672.50220   | 120.41589    | 95.1297 |
| 2      | 27.234        | MM   | 1.0019      | 136.82187    | 2.27602      | 4.8703  |

Totals : 2809.32407 122.69190

4.1.8.HPLC trace of Racemic 9-bromo-11b-methyl-1,2,5,6,11,11b-hexahydro[1,2]thiazolo[2',3':1,2]pyrido[3,4-b]indole 3,3-dioxide 6d

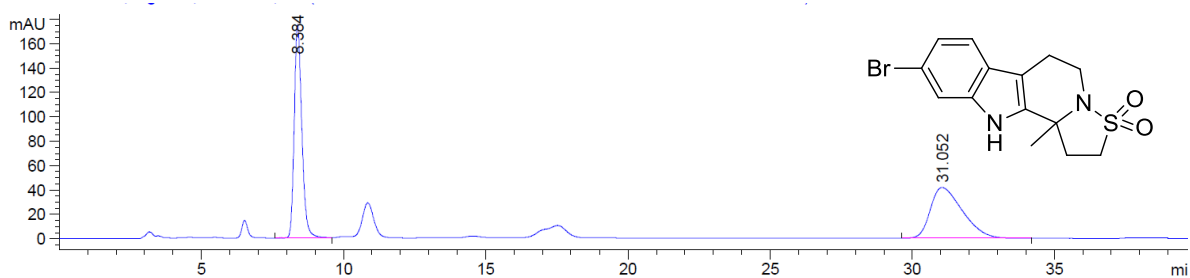

Signal 2: DAD1 B, Sig=220,8 Ref=360,100

| Peak # | RetTime [min] | Type | Width [min] | Area [mAU*s] | Height [mAU] | Area %  |
|--------|---------------|------|-------------|--------------|--------------|---------|
| 1      | 8.384         | BV   | 0.2880      | 3306.75732   | 175.39285    | 50.2104 |
| 2      | 31.052        | BB   | 1.1967      | 3279.05029   | 41.73261     | 49.7896 |

Totals : 6585.80762 217.12546

4.1.9.HPLC trace of 9-bromo-11b-methyl-1,2,5,6,11,11b-hexahydro[1,2]thiazolo[2',3':1,2]pyrido[3,4-b]indole 3,3-dioxide 6d

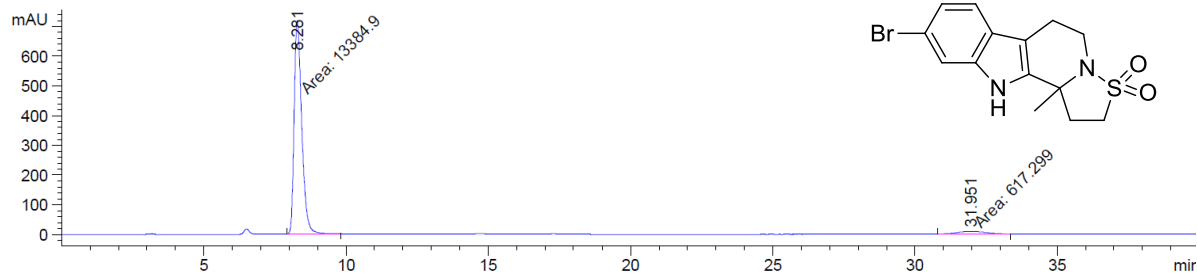

Signal 2: DAD1 B, Sig=220,8 Ref=360,100

| Peak # | RetTime [min] | Type | Width [min] | Area [mAU*s] | Height [mAU] | Area %  |
|--------|---------------|------|-------------|--------------|--------------|---------|
| 1      | 8.281         | MM   | 0.3102      | 1.33849e4    | 719.05499    | 95.5914 |
| 2      | 31.951        | MM   | 1.1629      | 617.29950    | 8.84681      | 4.4086  |

Totals : 1.40022e4 727.90180

4.1.10. HPLC trace of Racemic 8-fluoro-11b-methyl-1,2,5,6,11,11b-hexahydro[1,2]thiazolo[2',3':1,2]pyrido[3,4-b]indole 3,3-dioxide 6e

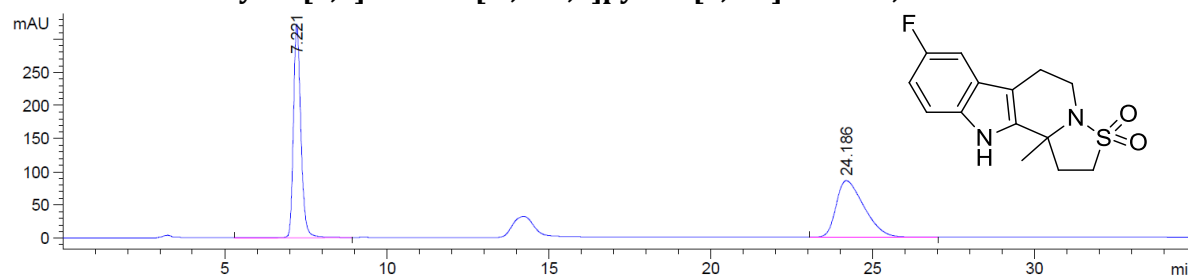

Signal 2: DAD1 B, Sig=220,8 Ref=360,100

| Peak # | RetTime [min] | Type | Width [min] | Area [mAU*s] | Height [mAU] | Area %  |
|--------|---------------|------|-------------|--------------|--------------|---------|
| 1      | 7.221         | VV   | 0.2477      | 5179.71240   | 321.97113    | 50.4178 |
| 2      | 24.186        | BB   | 0.9163      | 5093.87256   | 85.34870     | 49.5822 |

Totals : 1.02736e4 407.31983

4.1.11. HPLC trace of 8-fluoro-11b-methyl-1,2,5,6,11,11b-hexahydro[1,2]thiazolo[2',3':1,2]pyrido[3,4-b]indole 3,3-dioxide 6e

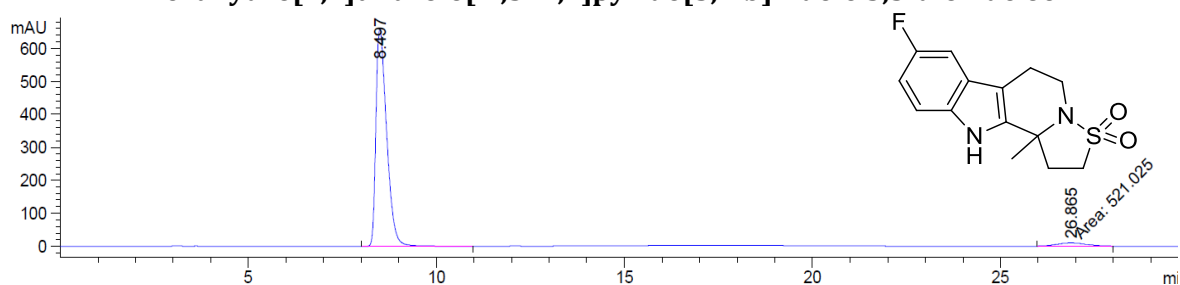

Signal 2: DAD1 B, Sig=220,8 Ref=360,100

| Peak # | RetTime [min] | Type | Width [min] | Area [mAU*s] | Height [mAU] | Area %  |
|--------|---------------|------|-------------|--------------|--------------|---------|
| 1      | 8.497         | VB   | 0.3021      | 1.30236e4    | 660.19110    | 96.1533 |
| 2      | 26.865        | MM   | 0.9136      | 521.02521    | 9.50467      | 3.8467  |

Totals : 1.35446e4 669.69577

4.1.12. HPLC trace of Racemic 9-fluoro-11b-methyl-1,2,5,6,11,11b-hexahydro[1,2]thiazolo[2',3':1,2]pyrido[3,4-b]indole 3,3-dioxide 6f

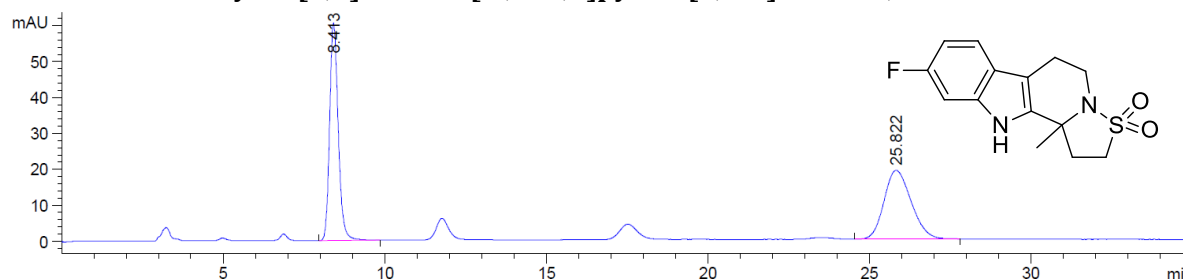

Signal 2: DAD1 B, Sig=220,8 Ref=360,100

| Peak # | RetTime [min] | Type | Width [min] | Area [mAU*s] | Height [mAU] | Area %  |
|--------|---------------|------|-------------|--------------|--------------|---------|
| 1      | 8.413         | BB   | 0.2888      | 1124.35437   | 60.50667     | 50.0497 |
| 2      | 25.822        | VB   | 0.9079      | 1122.12244   | 19.14278     | 49.9503 |

Totals : 2246.47681 79.64946

4.1.13. HPLC trace of 9-fluoro-11b-methyl-1,2,5,6,11,11b-hexahydro[1,2]thiazolo[2',3':1,2]pyrido[3,4-b]indole 3,3-dioxide 6f

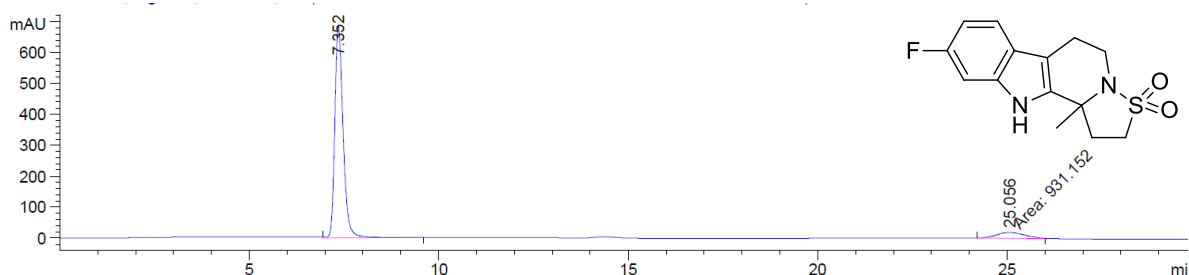

Signal 2: DAD1 B, Sig=220,8 Ref=360,100

| Peak # | RetTime [min] | Type | Width [min] | Area [mAU*s] | Height [mAU] | Area %  |
|--------|---------------|------|-------------|--------------|--------------|---------|
| 1      | 7.352         | VB   | 0.2388      | 1.05252e4    | 686.87543    | 91.8722 |
| 2      | 25.056        | MM   | 0.8457      | 931.15240    | 18.35109     | 8.1278  |

Totals : 1.14564e4 705.22652

4.1.14. HPLC trace of Racemic 11b-methyl-1,2,5,6,11,11b-hexahydro[1,2]thiazolo[2',3':1,2]pyrido[3,4-b]indole-8-carbonitrile 3,3-dioxide 6g

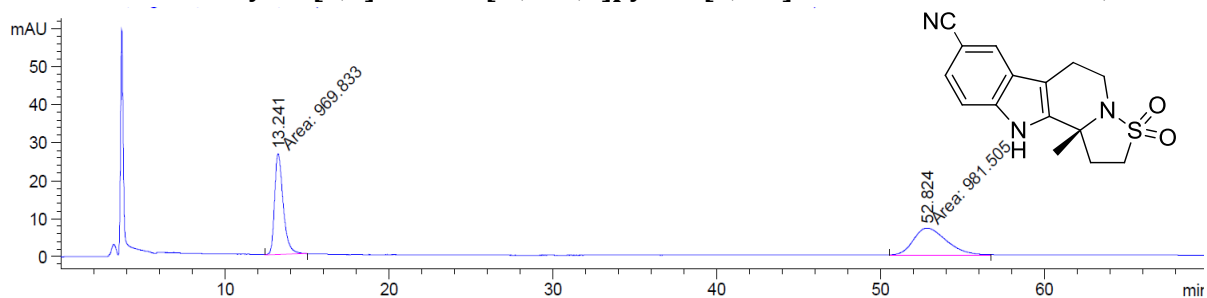

Signal 2: DAD1 B, Sig=220,8 Ref=360,100

| Peak # | RetTime [min] | Type | Width [min] | Area [mAU*s] | Height [mAU] | Area %  |
|--------|---------------|------|-------------|--------------|--------------|---------|
| 1      | 13.241        | MM   | 0.6082      | 969.83325    | 26.57452     | 49.7009 |
| 2      | 52.824        | MM   | 2.3171      | 981.50507    | 7.05992      | 50.2991 |

Totals : 1951.33832 33.63444

4.1.15. HPLC trace of 11b-methyl-1,2,5,6,11,11b-hexahydro[1,2]thiazolo[2',3':1,2]pyrido[3,4-b]indole-8-carbonitrile 3,3-dioxide 6g

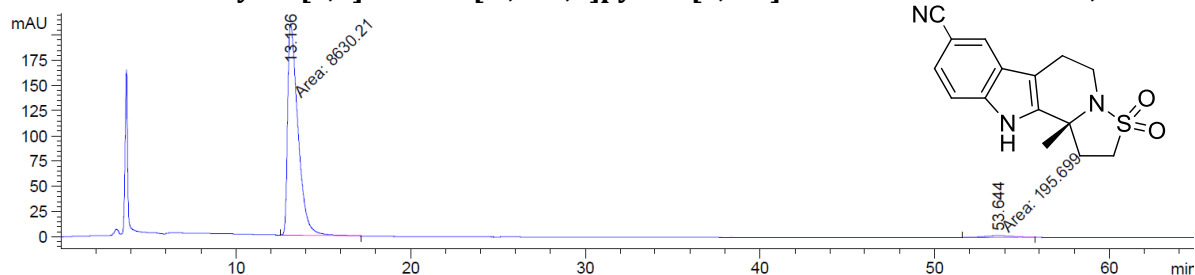

Signal 2: DAD1 B, Sig=220,8 Ref=360,100

| Peak # | RetTime [min] | Type | Width [min] | Area [mAU*s] | Height [mAU] | Area %  |
|--------|---------------|------|-------------|--------------|--------------|---------|
| 1      | 13.136        | MM   | 0.6861      | 8630.20508   | 209.65181    | 97.7827 |
| 2      | 53.644        | MM   | 2.0044      | 195.69910    | 1.62725      | 2.2173  |

Totals : 8825.90417 211.27906



4.1.16. HPLC trace of 8-methoxy-11b-methyl-1,2,5,6,11,11b-hexahydro[1,2]thiazolo[2',3':1,2]pyrido[3,4-b]indole 3,3-dioxide 6h

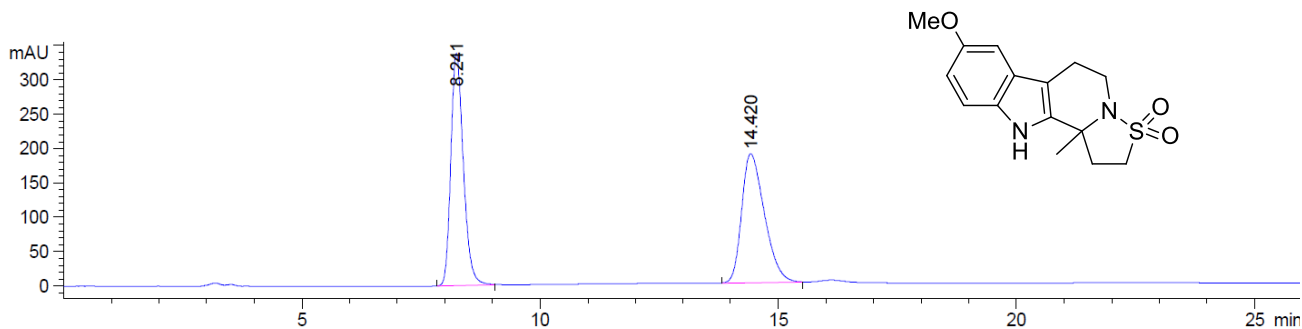

Signal 2: DAD1 B, Sig=220,8 Ref=360,100

| Peak # | RetTime [min] | Type | Width [min] | Area [mAU*s] | Height [mAU] | Area %  |
|--------|---------------|------|-------------|--------------|--------------|---------|
| 1      | 8.241         | BB   | 0.2805      | 6153.22998   | 337.82938    | 49.7137 |
| 2      | 14.420        | BB   | 0.5110      | 6224.09473   | 187.62210    | 50.2863 |

Totals : 1.23773e4 525.45148

4.1.17. HPLC trace of 8-methoxy-11b-methyl-1,2,5,6,11,11b-hexahydro[1,2]thiazolo[2',3':1,2]pyrido[3,4-b]indole 3,3-dioxide 6h

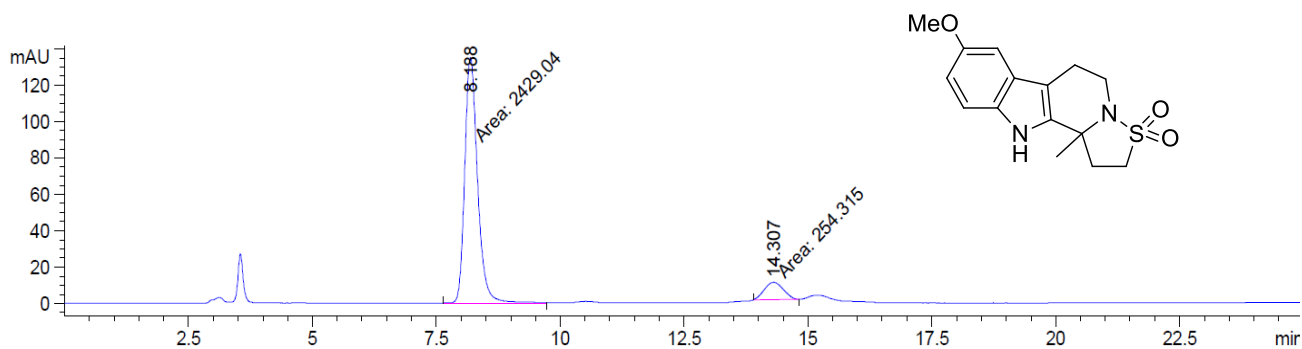

Signal 2: DAD1 B, Sig=220,8 Ref=360,100

| Peak # | RetTime [min] | Type | Width [min] | Area [mAU*s] | Height [mAU] | Area %  |
|--------|---------------|------|-------------|--------------|--------------|---------|
| 1      | 8.188         | MM   | 0.2998      | 2429.04248   | 135.01501    | 90.5225 |
| 2      | 14.307        | MM   | 0.4439      | 254.31540    | 9.54864      | 9.4775  |

Totals : 2683.35788 144.56366

4.1.18. HPLC trace of Racemic 8,11b-dimethyl-1,2,5,6,11,11b-hexahydro[1,2]thiazolo[2',3':1,2]pyrido[3,4-b]indole 3,3-dioxide 6i

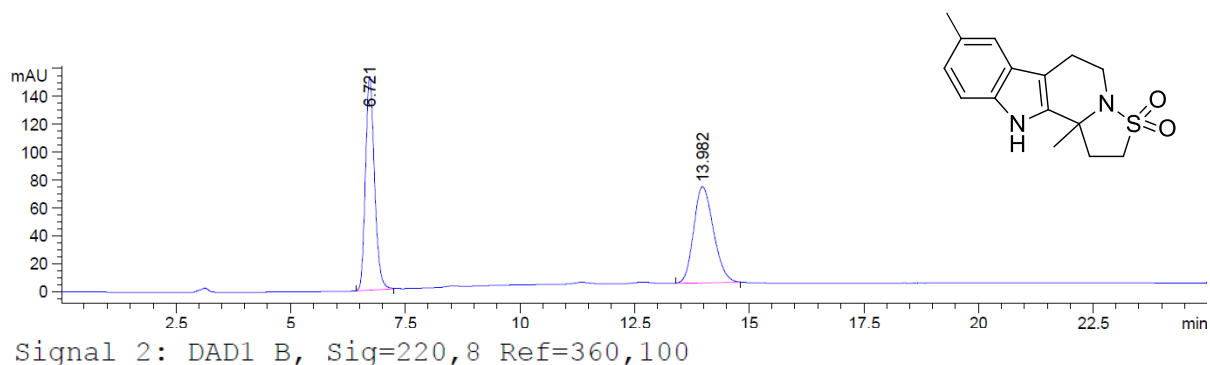

| Peak # | RetTime [min] | Type | Width [min] | Area [mAU*s] | Height [mAU] | Area %  |
|--------|---------------|------|-------------|--------------|--------------|---------|
| 1      | 6.721         | BB   | 0.2099      | 2099.92603   | 153.23482    | 50.1598 |
| 2      | 13.982        | BB   | 0.4707      | 2086.54614   | 69.01322     | 49.8402 |

Totals : 4186.47217 222.24804

4.1.19. HPLC trace of 8,11b-dimethyl-1,2,5,6,11,11b-hexahydro[1,2]thiazolo[2',3':1,2]pyrido[3,4-b]indole 3,3-dioxide 6i

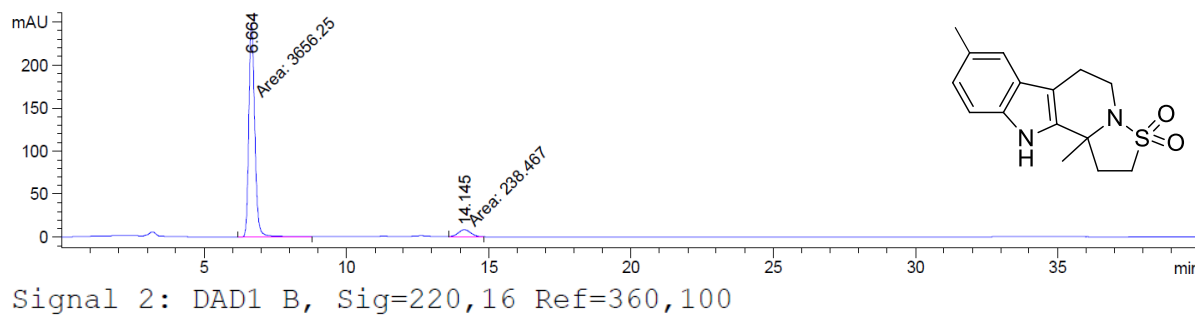

| Peak # | RetTime [min] | Type | Width [min] | Area [mAU*s] | Height [mAU] | Area %  |
|--------|---------------|------|-------------|--------------|--------------|---------|
| 1      | 6.664         | MM   | 0.2447      | 3656.24561   | 249.06523    | 93.8772 |
| 2      | 14.145        | MM   | 0.4921      | 238.46709    | 8.07716      | 6.1228  |

Totals : 3894.71269 257.14240

4.1.20. HPLC trace of Racemic 10,11b-dimethyl-1,2,5,6,11,11b-hexahydro[1,2]thiazolo[2',3':1,2]pyrido[3,4-b]indole 3,3-dioxide 6j

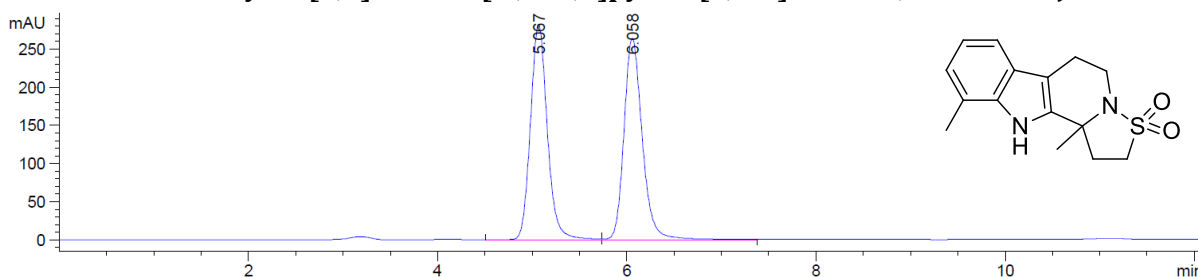

Signal 2: DAD1 B, Sig=220,16 Ref=360,100

| Peak # | RetTime [min] | Type | Width [min] | Area [mAU*s] | Height [mAU] | Area %  |
|--------|---------------|------|-------------|--------------|--------------|---------|
| 1      | 5.067         | VV   | 0.1930      | 3511.04712   | 282.56686    | 49.6121 |
| 2      | 6.058         | VB   | 0.2096      | 3565.95630   | 263.95245    | 50.3879 |

Totals : 7077.00342 546.51932

4.1.21. HPLC trace of 10,11b-dimethyl-1,2,5,6,11,11b-hexahydro[1,2]thiazolo[2',3':1,2]pyrido[3,4-b]indole 3,3-dioxide 6j

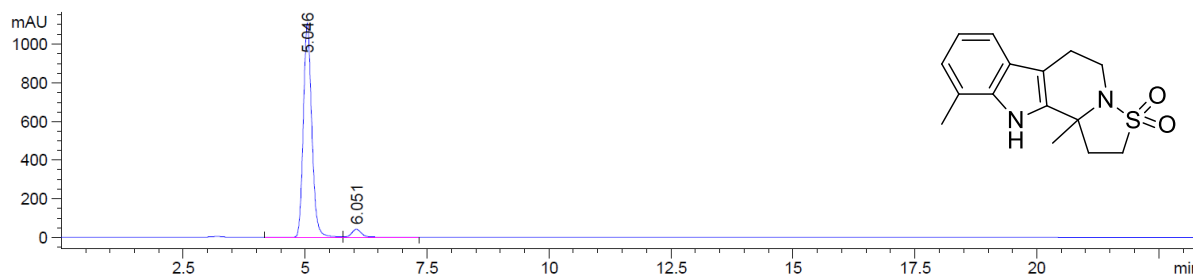

Signal 2: DAD1 B, Sig=220,8 Ref=360,100

| Peak # | RetTime [min] | Type | Width [min] | Area [mAU*s] | Height [mAU] | Area %  |
|--------|---------------|------|-------------|--------------|--------------|---------|
| 1      | 5.046         | BV   | 0.1894      | 1.34379e4    | 1108.46716   | 95.6662 |
| 2      | 6.051         | VB   | 0.2224      | 608.75525    | 41.67521     | 4.3338  |

Totals : 1.40466e4 1150.14238

4.1.22. HPLC trace of Racemic 10-ethyl-11b-methyl-1,2,5,6,11,11b-hexahydro[1,2]thiazolo[2',3':1,2]pyrido[3,4-b]indole 3,3-dioxide 6k

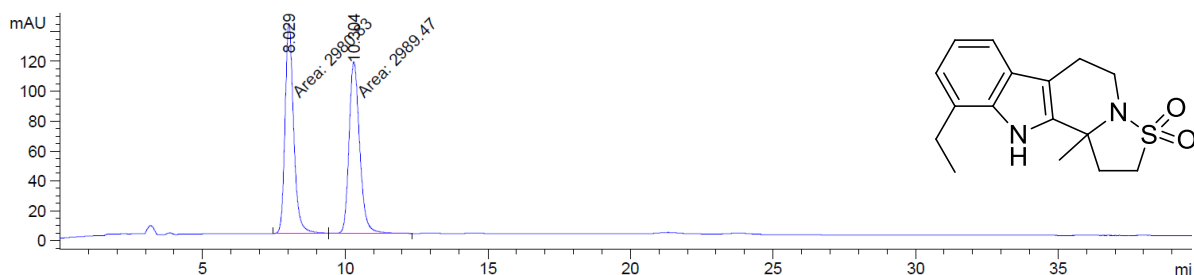

Signal 3: DAD1 C, Sig=220,8 Ref=360,100

| Peak #   | RetTime [min] | Type | Width [min] | Area [mAU*s] | Height [mAU] | Area %  |
|----------|---------------|------|-------------|--------------|--------------|---------|
| 1        | 8.029         | MF   | 0.3528      | 2980.82861   | 140.81139    | 49.9277 |
| 2        | 10.304        | FM   | 0.4335      | 2989.46655   | 114.93775    | 50.0723 |
| Totals : |               |      |             | 5970.29517   | 255.74914    |         |

4.1.23. HPLC trace of 10-ethyl-11b-methyl-1,2,5,6,11,11b-hexahydro[1,2]thiazolo[2',3':1,2]pyrido[3,4-b]indole 3,3-dioxide 6k

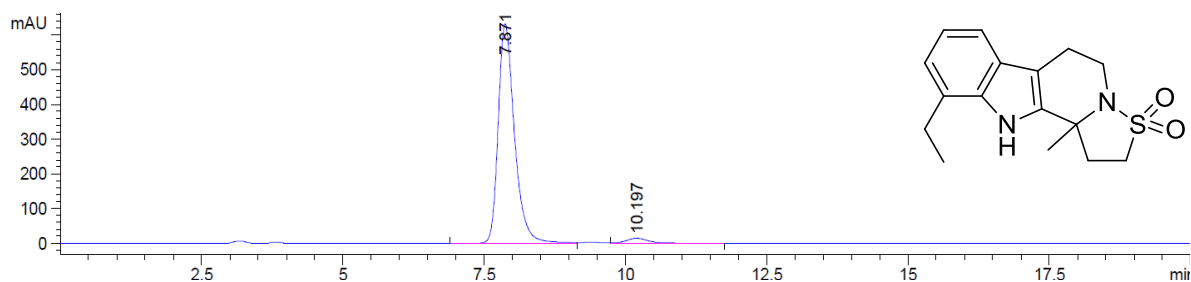

Signal 3: DAD1 C, Sig=220,8 Ref=360,100

| Peak #   | RetTime [min] | Type | Width [min] | Area [mAU*s] | Height [mAU] | Area %  |
|----------|---------------|------|-------------|--------------|--------------|---------|
| 1        | 7.870         | BB   | 0.3043      | 1.25748e4    | 631.57336    | 97.4176 |
| 2        | 10.196        | BB   | 0.3804      | 333.34106    | 13.58081     | 2.5824  |
| Totals : |               |      |             | 1.29081e4    | 645.15418    |         |

## Amide

### HPLC trace of Racemic 12b-methyl-2,3,6,7,12,12b-hexahydroindolo[2,3-a]quinolizin-4(1H)-one 10a

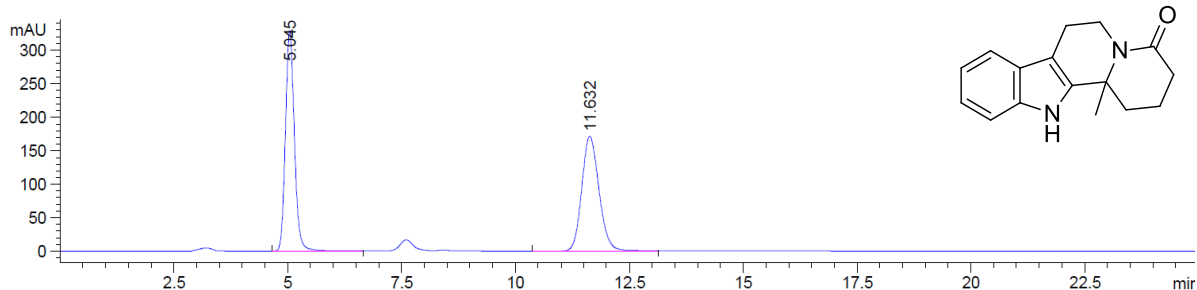

Signal 2: DAD1 B, Sig=220,8 Ref=360,100

| Peak # | RetTime [min] | Type | Width [min] | Area [mAU*s] | Height [mAU] | Area %  |
|--------|---------------|------|-------------|--------------|--------------|---------|
| 1      | 5.045         | VV   | 0.2131      | 4544.93945   | 329.05899    | 49.9785 |
| 2      | 11.632        | BB   | 0.4097      | 4548.85742   | 171.38036    | 50.0215 |

Totals : 9093.79688 500.43935

### HPLC trace of 12b-methyl-2,3,6,7,12,12b-hexahydroindolo[2,3-a]quinolizin-4(1H)-one 10a

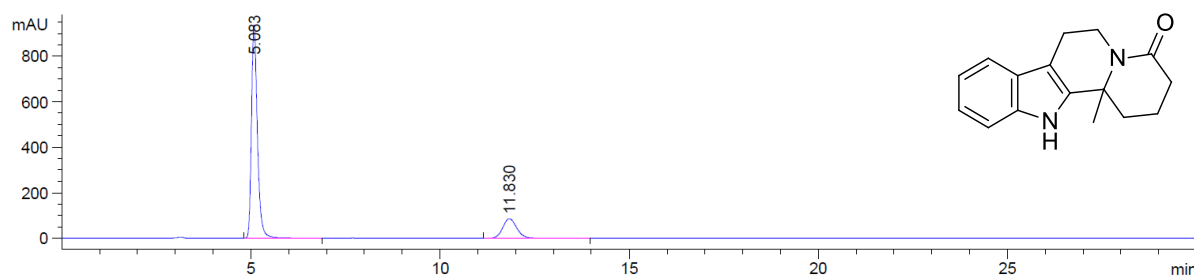

Signal 2: DAD1 B, Sig=220,8 Ref=360,100

| Peak # | RetTime [min] | Type | Width [min] | Area [mAU*s] | Height [mAU] | Area %  |
|--------|---------------|------|-------------|--------------|--------------|---------|
| 1      | 5.082         | MM   | 0.1846      | 1.04069e4    | 939.76501    | 82.8246 |
| 2      | 11.829        | MM   | 0.4200      | 2158.08838   | 85.64144     | 17.1754 |

Totals : 1.25650e4 1025.40646

## 4.2. Amide cyclization products

### 4.2.1. HPLC trace of Racemic 11-bromo-12b-methyl-2,3,6,7,12,12b-hexahydroindolo[2,3-a]quinolizin-4(1H)-one 10b

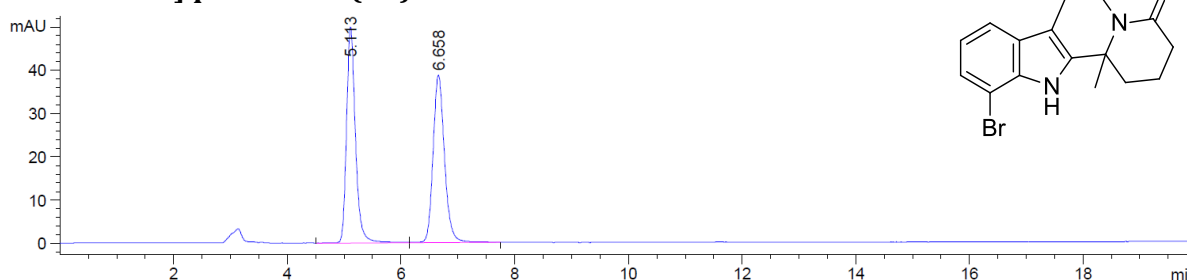

Signal 2: DAD1 B, Sig=220,8 Ref=360,100

| Peak # | RetTime [min] | Type | Width [min] | Area [mAU*s] | Height [mAU] | Area %  |
|--------|---------------|------|-------------|--------------|--------------|---------|
| 1      | 5.113         | VV   | 0.1718      | 545.88226    | 49.84857     | 50.1874 |
| 2      | 6.658         | VB   | 0.2154      | 541.80627    | 38.68854     | 49.8126 |

Totals : 1087.68854 88.53711

### 4.2.2. HPLC trace of 11-bromo-12b-methyl-2,3,6,7,12,12b-hexahydroindolo[2,3-a]quinolizin-4(1H)-one 10b

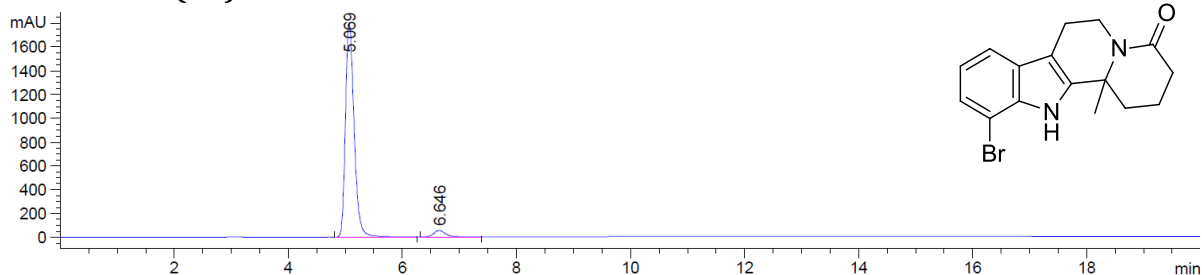

Signal 2: DAD1 B, Sig=220,8 Ref=360,100

| Peak # | RetTime [min] | Type | Width [min] | Area [mAU*s] | Height [mAU] | Area %  |
|--------|---------------|------|-------------|--------------|--------------|---------|
| 1      | 5.067         | VB   | 0.1602      | 1.88902e4    | 1803.75488   | 96.3498 |
| 2      | 6.645         | BB   | 0.2103      | 715.64355    | 52.73191     | 3.6502  |

Totals : 1.96059e4 1856.48679

#### 4.2.3.HPLC trace of racemic 11,12b-dimethyl-2,3,6,7,12,12b-hexahydroindolo[2,3-a]quinolizin-4(1H)-one 10c

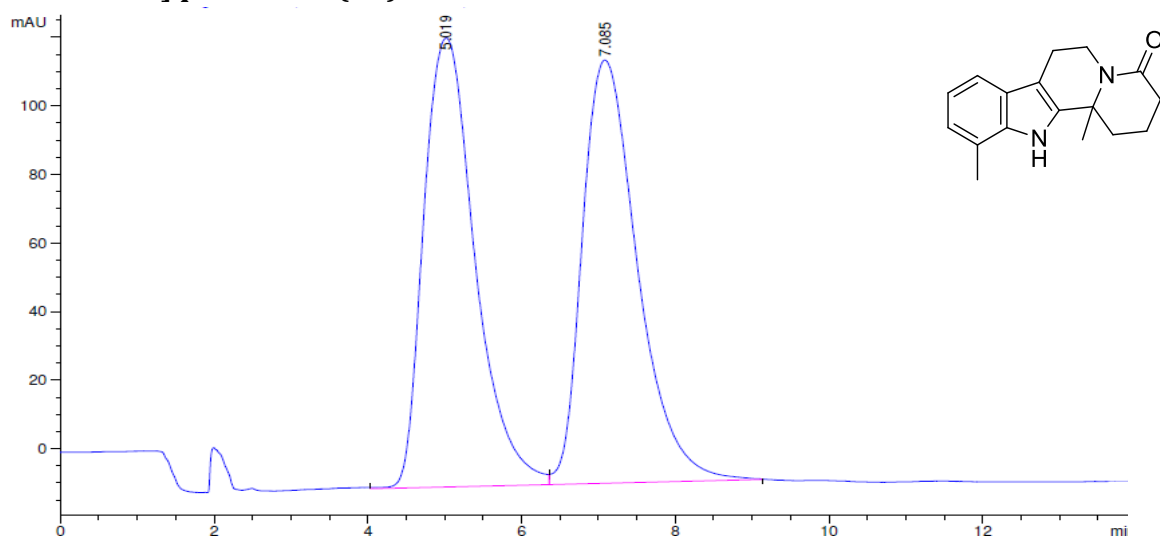

Signal 1: VWD1 A, Wavelength=220 nm

| Peak # | RetTime [min] | Type | Width [min] | Area [mAU*s] | Height [mAU] | Area %  |
|--------|---------------|------|-------------|--------------|--------------|---------|
| 1      | 5.019         | VV   | 0.5596      | 6079.96680   | 130.96616    | 49.6528 |
| 2      | 7.085         | VB   | 0.7037      | 6164.99609   | 123.44200    | 50.3472 |

#### 4.2.4.HPLC trace of 11,12b-dimethyl-2,3,6,7,12,12b-hexahydroindolo[2,3-a]quinolizin-4(1H)-one 10c

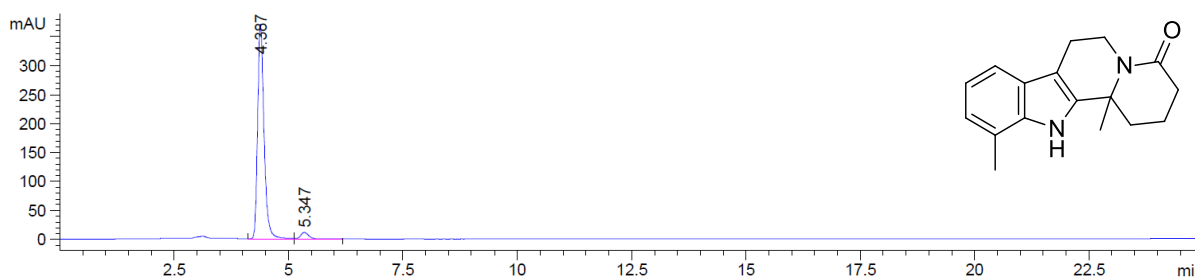

Signal 2: DAD1 B, Sig=220,8 Ref=360,100

| Peak # | RetTime [min] | Type | Width [min] | Area [mAU*s] | Height [mAU] | Area %  |
|--------|---------------|------|-------------|--------------|--------------|---------|
| 1      | 4.385         | BB   | 0.1487      | 3578.53735   | 370.48203    | 96.5189 |
| 2      | 5.347         | BB   | 0.1754      | 129.06354    | 11.12429     | 3.4811  |

Totals : 3707.60089 381.60631

4.2.5.HPLC trace of racemic 11-ethyl-12b-methyl-2,3,6,7,12,12b-hexahydroindolo[2,3-*a*]quinolizin-4(1*H*)-one 10d

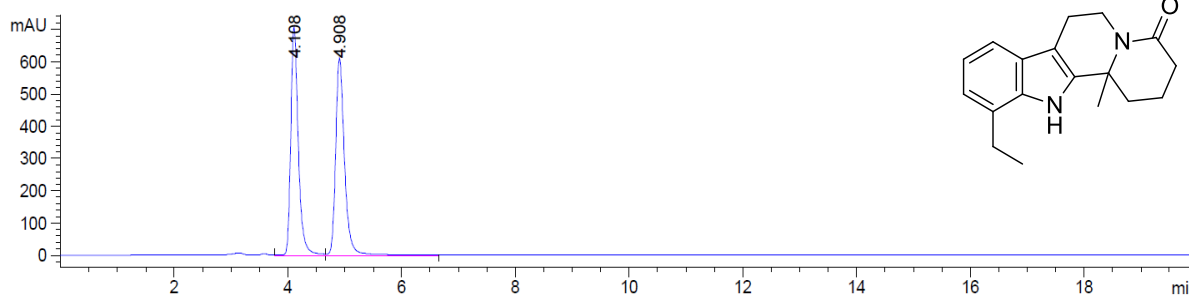

Signal 2: DAD1 B, Sig=220,8 Ref=360,100

| Peak # | RetTime [min] | Type | Width [min] | Area [mAU*s] | Height [mAU] | Area %  |
|--------|---------------|------|-------------|--------------|--------------|---------|
| 1      | 4.108         | VV   | 0.1432      | 6486.74707   | 706.11816    | 49.4928 |
| 2      | 4.908         | VB   | 0.1667      | 6619.69873   | 609.59180    | 50.5072 |

Totals : 1.31064e4 1315.70996

4.2.6.HPLC trace of 11-ethyl-12b-methyl-2,3,6,7,12,12b-hexahydroindolo[2,3-*a*]quinolizin-4(1*H*)-one 10d

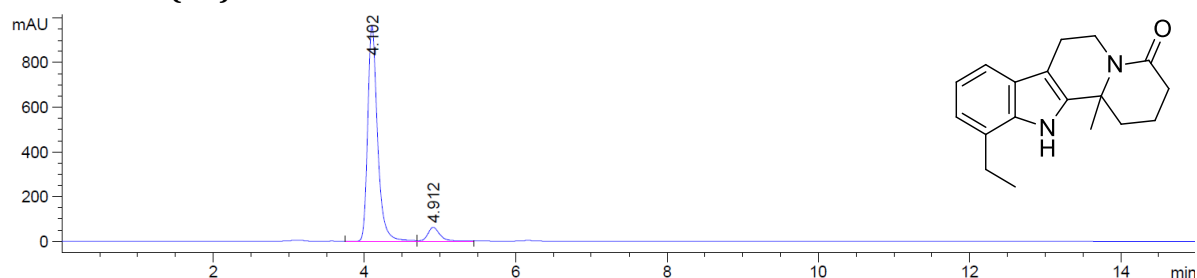

Signal 2: DAD1 B, Sig=220,8 Ref=360,100

| Peak # | RetTime [min] | Type | Width [min] | Area [mAU*s] | Height [mAU] | Area %  |
|--------|---------------|------|-------------|--------------|--------------|---------|
| 1      | 4.100         | BV   | 0.1379      | 8776.01367   | 966.42841    | 92.8026 |
| 2      | 4.911         | VB   | 0.1657      | 680.63605    | 62.18039     | 7.1974  |

Totals : 9456.64972 1028.60880



4.2.7.HPLC trace of racemic 11-(3-bromobenzyl)-11b-methyl-1,2,5,6,11,11b-hexahydro[1,2]thiazolo[2',3':1,2]pyrido[3,4-b]indole 3,3-dioxide 15a

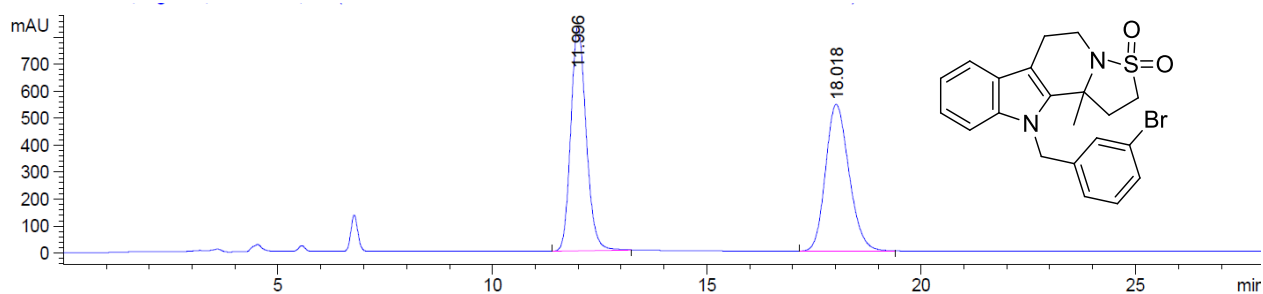

Signal 2: DAD1 B, Sig=220,16 Ref=360,100

| Peak # | RetTime [min] | Type | Width [min] | Area [mAU*s] | Height [mAU] | Area %  |
|--------|---------------|------|-------------|--------------|--------------|---------|
| 1      | 11.996        | BB   | 0.3824      | 2.07558e4    | 833.93286    | 50.0573 |
| 2      | 18.018        | BB   | 0.5878      | 2.07083e4    | 544.39233    | 49.9427 |

Totals : 4.14642e4 1378.32520

4.2.8.HPLC trace of 11-(3-bromobenzyl)-11b-methyl-1,2,5,6,11,11b-hexahydro[1,2]thiazolo[2',3':1,2]pyrido[3,4-b]indole 3,3-dioxide 15a

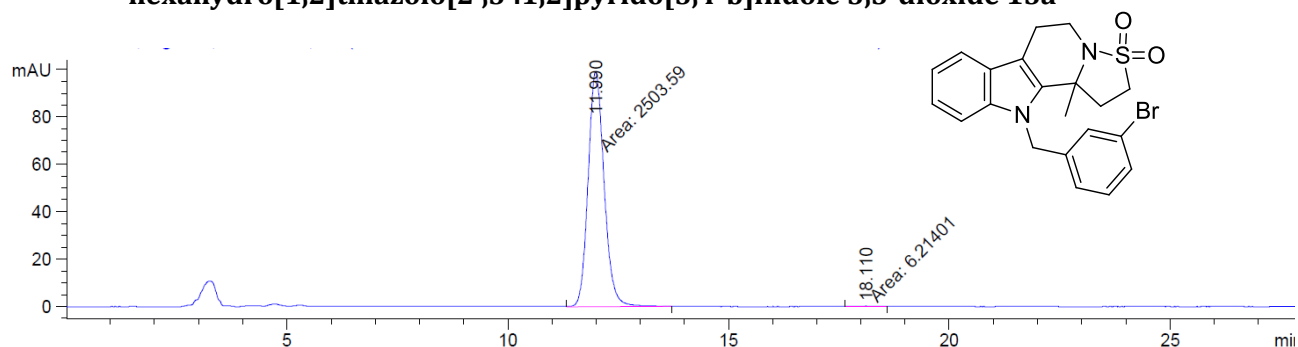

Signal 2: DAD1 B, Sig=220,16 Ref=360,100

| Peak # | RetTime [min] | Type | Width [min] | Area [mAU*s] | Height [mAU] | Area %  |
|--------|---------------|------|-------------|--------------|--------------|---------|
| 1      | 11.990        | MM   | 0.4209      | 2503.59058   | 99.12993     | 99.7524 |
| 2      | 18.110        | MM   | 0.5144      | 6.21401      | 2.01351e-1   | 0.2476  |

Totals : 2509.80458 99.33128

## 5. Xray Data<sup>11</sup>

### 5.1. X-ray data for compound 10b

#### 11-bromo-12b-methyl-2,3,6,7,12,12b-hexahydroindolo[2,3-a]quinolizin-4(1H)-one

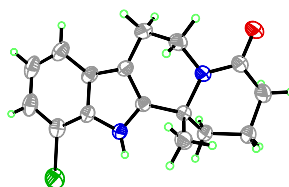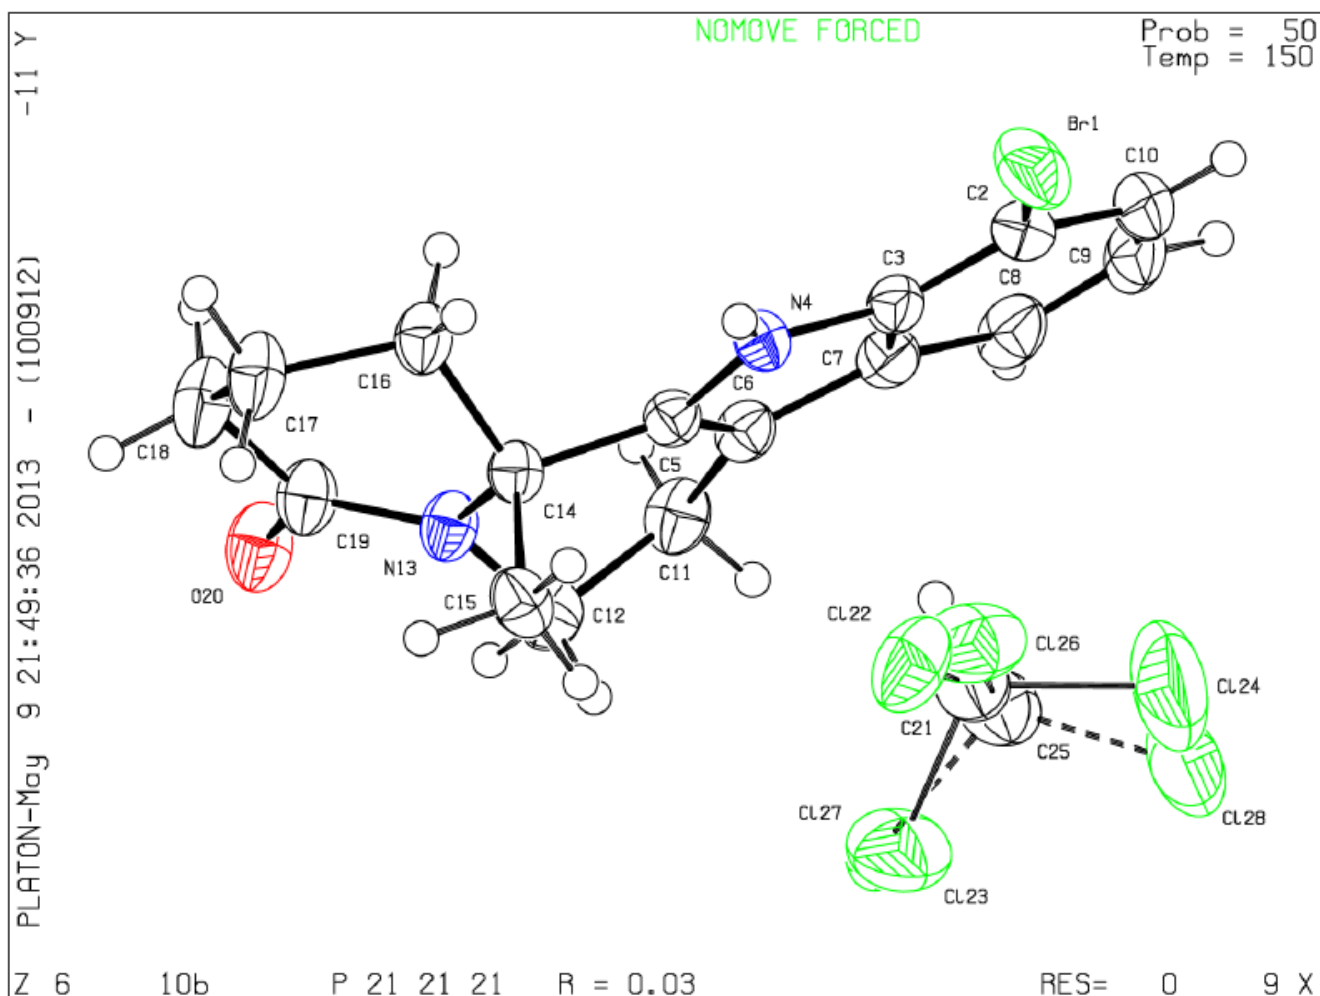

#### (10b)

##### Crystal data

$C_{16}H_{17}BrN_2O \cdot CHCl_3$   
 $M_r = 452.60$   
Orthorhombic,  $P2_12_12_1$   
Hall symbol: P 2ac 2ab

$D_x = 1.567 \text{ Mg m}^{-3}$   
Melting point: not measured K  
Mo  $K\alpha$  radiation,  $\lambda = 0.71073 \text{ \AA}$   
Cell parameters from 83413 reflections

$a = 11.0236 (2) \text{ \AA}$   
 $b = 12.9544 (2) \text{ \AA}$   
 $c = 13.4366 (2) \text{ \AA}$   
 $V = 1918.80 (5) \text{ \AA}^3$   
 $Z = 4$   
 $F(000) = 912$

$\theta = 5\text{--}27^\circ$   
 $\mu = 2.57 \text{ mm}^{-1}$   
 $T = 150 \text{ K}$   
 Block, Clear\_pale\_colourless  
 $0.62 \times 0.38 \times 0.30 \text{ mm}$

#### Data collection

Nonius KappaCCD  
 diffractometer  
 Graphite monochromator  
 $\omega$  scans  
 Absorption correction: Multi-scan  
 DENZO/SCALEPACK (Otwinowski & Minor, 1997)  
 $T_{\min} = 0.17, T_{\max} = 0.46$   
 56832 measured reflections  
 4361 independent reflections

4092 reflections with  $I > 2.0\sigma(I)$   
 $R_{\text{int}} = 0.087$   
 $\theta_{\max} = 27.5^\circ, \theta_{\min} = 5.2^\circ$   
 $h = -14 \rightarrow 14$   
 $k = -16 \rightarrow 16$   
 $l = -17 \rightarrow 17$

#### Refinement

Refinement on  $F^2$   
 Least-squares matrix: Full  
  
 $R[F^2 > 2\sigma(F^2)] = 0.034$   
  
 $wR(F^2) = 0.083$   
 $S = 1.00$   
 4361 reflections  
 255 parameters  
 162 restraints  
 Primary atom site location: Other

Hydrogen site location: Difference Fourier map  
 H-atom parameters constrained  
 Method, part 1, Chebychev polynomial, (Watkin, 1994, Prince, 1982) [weight] =  $1.0/[A_0 * T_0(x) + A_1 * T_1(x) \dots + A_{n-1} * T_{n-1}(x)]$   
 where  $A_i$  are the Chebychev coefficients listed below and  $x = F / F_{\max}$  Method = Robust Weighting (Prince, 1982)  $W = [\text{weight}] * [1 - (\Delta F / 6 * \sigma F)^2]^2$   $A_i$  are: 69.2 115. 71.6 31.4 7.79  
 $(\Delta/\sigma)_{\max} = 0.002$   
 $\Delta\rho_{\max} = 0.42 \text{ e \AA}^{-3}$   
 $\Delta\rho_{\min} = -0.44 \text{ e \AA}^{-3}$   
 Absolute structure: Flack (1983), 1893 Friedel-pairs  
 Flack parameter:  $-0.007 (8)$

#### Fractional atomic coordinates and isotropic or equivalent isotropic displacement parameters ( $\text{\AA}^2$ )

|     | x            | y            | z            | $U_{\text{iso}}^*/U_{\text{eq}}$ | Occ. (<1) |
|-----|--------------|--------------|--------------|----------------------------------|-----------|
| Br1 | 0.65201 (3)  | 0.67046 (3)  | 1.08633 (3)  | 0.0538                           |           |
| C2  | 0.6812 (2)   | 0.65084 (19) | 0.9491 (2)   | 0.0375                           |           |
| C3  | 0.5948 (2)   | 0.60131 (18) | 0.89063 (19) | 0.0304                           |           |
| N4  | 0.48228 (17) | 0.56306 (15) | 0.91457 (17) | 0.0289                           |           |
| C5  | 0.4336 (2)   | 0.51801 (19) | 0.82999 (17) | 0.0269                           |           |
| C6  | 0.5127 (2)   | 0.52769 (19) | 0.75153 (19) | 0.0299                           |           |
| C7  | 0.6164 (2)   | 0.58180 (19) | 0.78843 (19) | 0.0321                           |           |
| C8  | 0.7263 (2)   | 0.6159 (2)   | 0.7450 (2)   | 0.0424                           |           |
| C9  | 0.8085 (3)   | 0.6668 (3)   | 0.8039 (3)   | 0.0480                           |           |
| C10 | 0.7884 (2)   | 0.6833 (2)   | 0.9055 (3)   | 0.0454                           |           |
| C11 | 0.4861 (3)   | 0.4819 (2)   | 0.65142 (19) | 0.0377                           |           |

|      |              |              |              |         |           |
|------|--------------|--------------|--------------|---------|-----------|
| C12  | 0.3845 (3)   | 0.4028 (2)   | 0.66363 (19) | 0.0366  |           |
| N13  | 0.28353 (19) | 0.44722 (18) | 0.72179 (15) | 0.0318  |           |
| C14  | 0.3093 (2)   | 0.47060 (19) | 0.82822 (17) | 0.0274  |           |
| C15  | 0.3064 (3)   | 0.3708 (2)   | 0.88971 (19) | 0.0361  |           |
| C16  | 0.2171 (2)   | 0.5493 (2)   | 0.8680 (2)   | 0.0348  |           |
| C17  | 0.0883 (3)   | 0.5161 (3)   | 0.8449 (2)   | 0.0433  |           |
| C18  | 0.0731 (3)   | 0.5135 (3)   | 0.7325 (2)   | 0.0475  |           |
| C19  | 0.1766 (2)   | 0.4651 (2)   | 0.6760 (2)   | 0.0360  |           |
| O20  | 0.16200 (19) | 0.44316 (18) | 0.58674 (15) | 0.0457  |           |
| C21  | 0.6761 (2)   | 0.3428 (2)   | 0.9014 (2)   | 0.0530  | 0.739 (8) |
| Cl22 | 0.5983 (2)   | 0.3334 (2)   | 1.01359 (14) | 0.0620  | 0.739 (8) |
| Cl23 | 0.6434 (4)   | 0.2372 (4)   | 0.8252 (3)   | 0.0789  | 0.739 (8) |
| Cl24 | 0.83178 (19) | 0.3520 (3)   | 0.9223 (3)   | 0.1103  | 0.739 (8) |
| C25  | 0.7068 (7)   | 0.3351 (4)   | 0.8686 (6)   | 0.0653  | 0.261 (8) |
| Cl26 | 0.6526 (11)  | 0.3566 (4)   | 0.9885 (5)   | 0.0775  | 0.261 (8) |
| Cl27 | 0.6276 (5)   | 0.2345 (8)   | 0.8120 (6)   | 0.0449  | 0.261 (8) |
| Cl28 | 0.8619 (7)   | 0.3086 (6)   | 0.8709 (8)   | 0.0923  | 0.261 (8) |
| H81  | 0.7411       | 0.6060       | 0.6779       | 0.0511* |           |
| H91  | 0.8809       | 0.6888       | 0.7744       | 0.0580* |           |
| H101 | 0.8460       | 0.7155       | 0.9432       | 0.0539* |           |
| H111 | 0.5574       | 0.4481       | 0.6240       | 0.0450* |           |
| H112 | 0.4596       | 0.5355       | 0.6043       | 0.0454* |           |
| H121 | 0.4164       | 0.3434       | 0.7000       | 0.0432* |           |
| H122 | 0.3531       | 0.3786       | 0.6004       | 0.0436* |           |
| H151 | 0.2278       | 0.3397       | 0.8850       | 0.0533* |           |
| H152 | 0.3263       | 0.3876       | 0.9579       | 0.0534* |           |
| H153 | 0.3649       | 0.3239       | 0.8652       | 0.0533* |           |
| H161 | 0.2277       | 0.5547       | 0.9386       | 0.0418* |           |
| H162 | 0.2337       | 0.6164       | 0.8380       | 0.0419* |           |
| H171 | 0.0313       | 0.5647       | 0.8702       | 0.0517* |           |
| H172 | 0.0713       | 0.4491       | 0.8731       | 0.0517* |           |
| H181 | 0.0687       | 0.5825       | 0.7066       | 0.0583* |           |
| H182 | 0.0010       | 0.4749       | 0.7145       | 0.0575* |           |
| H211 | 0.6492       | 0.4053       | 0.8682       | 0.0639* | 0.739 (8) |
| H251 | 0.6951       | 0.3976       | 0.8291       | 0.0778* | 0.261 (8) |
| H41  | 0.4494       | 0.5652       | 0.9709       | 0.0352* |           |

*Atomic displacement parameters ( $\text{\AA}^2$ )*

|     | $U^{11}$     | $U^{22}$     | $U^{33}$     | $U^{12}$      | $U^{13}$      | $U^{23}$      |
|-----|--------------|--------------|--------------|---------------|---------------|---------------|
| Br1 | 0.05236 (17) | 0.05674 (18) | 0.05220 (17) | -0.01281 (15) | -0.00665 (15) | -0.01813 (14) |
| C2  | 0.0338 (13)  | 0.0294 (12)  | 0.0493 (14)  | -0.0009 (9)   | -0.0014 (10)  | -0.0007 (10)  |
| C3  | 0.0248 (10)  | 0.0280 (11)  | 0.0384 (13)  | 0.0008 (8)    | 0.0029 (9)    | 0.0030 (9)    |
| N4  | 0.0265 (9)   | 0.0308 (9)   | 0.0296 (9)   | -0.0035 (7)   | 0.0008 (8)    | 0.0000 (8)    |
| C5  | 0.0273 (11)  | 0.0266 (10)  | 0.0268 (11)  | 0.0007 (9)    | 0.0003 (9)    | 0.0009 (8)    |
| C6  | 0.0280 (11)  | 0.0317 (11)  | 0.0300 (11)  | 0.0023 (9)    | 0.0047 (9)    | 0.0034 (9)    |
| C7  | 0.0298 (12)  | 0.0283 (11)  | 0.0383 (12)  | 0.0008 (9)    | 0.0069 (9)    | 0.0066 (9)    |
| C8  | 0.0327 (13)  | 0.0425 (15)  | 0.0519 (16)  | 0.0041 (11)   | 0.0126 (12)   | 0.0144 (13)   |
| C9  | 0.0264 (12)  | 0.0435 (14)  | 0.074 (2)    | -0.0011 (12)  | 0.0071 (12)   | 0.0162 (15)   |
| C10 | 0.0295 (12)  | 0.0356 (13)  | 0.0710 (19)  | -0.0050 (10)  | -0.0010 (14)  | 0.0032 (15)   |

|      |             |             |             |              |              |              |
|------|-------------|-------------|-------------|--------------|--------------|--------------|
| C11  | 0.0330 (13) | 0.0502 (15) | 0.0299 (12) | 0.0037 (11)  | 0.0059 (10)  | -0.0006 (11) |
| C12  | 0.0365 (13) | 0.0437 (14) | 0.0297 (11) | 0.0059 (10)  | -0.0013 (10) | -0.0064 (10) |
| N13  | 0.0276 (10) | 0.0424 (11) | 0.0256 (9)  | 0.0032 (8)   | -0.0018 (8)  | -0.0006 (8)  |
| C14  | 0.0255 (11) | 0.0329 (11) | 0.0239 (10) | -0.0003 (9)  | -0.0005 (8)  | 0.0000 (8)   |
| C15  | 0.0358 (12) | 0.0379 (12) | 0.0345 (13) | -0.0085 (10) | -0.0042 (10) | 0.0052 (10)  |
| C16  | 0.0262 (12) | 0.0447 (14) | 0.0335 (12) | 0.0011 (10)  | 0.0023 (10)  | -0.0025 (11) |
| C17  | 0.0260 (13) | 0.067 (2)   | 0.0373 (14) | 0.0027 (12)  | 0.0013 (10)  | -0.0036 (13) |
| C18  | 0.0296 (13) | 0.073 (2)   | 0.0398 (14) | 0.0070 (13)  | -0.0048 (11) | -0.0062 (14) |
| C19  | 0.0314 (13) | 0.0475 (14) | 0.0291 (12) | 0.0015 (10)  | -0.0041 (10) | 0.0027 (10)  |
| O20  | 0.0391 (10) | 0.0690 (12) | 0.0290 (8)  | 0.0048 (9)   | -0.0072 (9)  | -0.0025 (9)  |
| C21  | 0.0506 (19) | 0.0427 (18) | 0.066 (2)   | -0.0010 (16) | -0.0121 (18) | 0.0043 (17)  |
| Cl22 | 0.0550 (10) | 0.0807 (10) | 0.0502 (7)  | 0.0210 (8)   | -0.0150 (6)  | -0.0013 (8)  |
| Cl23 | 0.089 (2)   | 0.0648 (14) | 0.0833 (17) | -0.0014 (16) | 0.0082 (15)  | -0.0288 (13) |
| Cl24 | 0.0523 (9)  | 0.127 (2)   | 0.151 (3)   | -0.0348 (11) | -0.0107 (13) | 0.022 (2)    |
| C25  | 0.071 (4)   | 0.050 (4)   | 0.075 (4)   | -0.001 (3)   | -0.030 (4)   | -0.005 (3)   |
| Cl26 | 0.111 (5)   | 0.059 (2)   | 0.063 (3)   | 0.019 (3)    | -0.030 (3)   | -0.0177 (19) |
| Cl27 | 0.0318 (19) | 0.047 (3)   | 0.056 (3)   | 0.0025 (14)  | -0.0096 (16) | -0.0139 (19) |
| Cl28 | 0.065 (3)   | 0.081 (3)   | 0.131 (5)   | -0.026 (2)   | -0.034 (3)   | 0.014 (3)    |

*Geometric parameters (Å, °)*

|            |           |              |           |
|------------|-----------|--------------|-----------|
| Br1—C2     | 1.889 (3) | N13—C19      | 1.349 (3) |
| C2—C3      | 1.391 (4) | C14—C15      | 1.534 (3) |
| C2—C10     | 1.384 (4) | C14—C16      | 1.536 (3) |
| C3—N4      | 1.374 (3) | C15—H151     | 0.958     |
| C3—C7      | 1.416 (4) | C15—H152     | 0.967     |
| N4—C5      | 1.385 (3) | C15—H153     | 0.945     |
| N4—H41     | 0.840     | C16—C17      | 1.516 (4) |
| C5—C6      | 1.374 (3) | C16—H161     | 0.957     |
| C5—C14     | 1.502 (3) | C16—H162     | 0.977     |
| C6—C7      | 1.429 (4) | C17—C18      | 1.520 (4) |
| C6—C11     | 1.499 (4) | C17—H171     | 0.952     |
| C7—C8      | 1.415 (4) | C17—H172     | 0.966     |
| C8—C9      | 1.371 (5) | C18—C19      | 1.507 (4) |
| C8—H81     | 0.926     | C18—H181     | 0.961     |
| C9—C10     | 1.399 (5) | C18—H182     | 0.969     |
| C9—H91     | 0.936     | C19—O20      | 1.244 (3) |
| C10—H101   | 0.914     | C21—Cl22     | 1.738 (3) |
| C11—C12    | 1.527 (4) | C21—Cl23     | 1.746 (3) |
| C11—H111   | 0.972     | C21—Cl24     | 1.743 (3) |
| C11—H112   | 0.984     | C21—H211     | 0.972     |
| C12—N13    | 1.477 (3) | C25—Cl26     | 1.740 (5) |
| C12—H121   | 0.976     | C25—Cl27     | 1.743 (5) |
| C12—H122   | 0.968     | C25—Cl28     | 1.744 (5) |
| N13—C14    | 1.489 (3) | C25—H251     | 0.976     |
| Br1—C2—C3  | 119.8 (2) | N13—C14—C15  | 110.0 (2) |
| Br1—C2—C10 | 121.2 (2) | C5—C14—C16   | 109.1 (2) |
| C3—C2—C10  | 119.0 (3) | N13—C14—C16  | 110.1 (2) |
| C2—C3—N4   | 130.7 (2) | C15—C14—C16  | 111.0 (2) |
| C2—C3—C7   | 121.0 (2) | C14—C15—H151 | 109.7     |

|               |             |               |            |
|---------------|-------------|---------------|------------|
| N4—C3—C7      | 108.3 (2)   | C14—C15—H152  | 108.4      |
| C3—N4—C5      | 108.0 (2)   | H151—C15—H152 | 111.2      |
| C3—N4—H41     | 126.0       | C14—C15—H153  | 109.9      |
| C5—N4—H41     | 125.9       | H151—C15—H153 | 108.9      |
| N4—C5—C6      | 110.2 (2)   | H152—C15—H153 | 108.7      |
| N4—C5—C14     | 122.6 (2)   | C14—C16—C17   | 111.1 (2)  |
| C6—C5—C14     | 127.2 (2)   | C14—C16—H161  | 108.2      |
| C5—C6—C7      | 106.6 (2)   | C17—C16—H161  | 109.8      |
| C5—C6—C11     | 121.9 (2)   | C14—C16—H162  | 108.8      |
| C7—C6—C11     | 131.5 (2)   | C17—C16—H162  | 110.1      |
| C6—C7—C3      | 106.8 (2)   | H161—C16—H162 | 108.7      |
| C6—C7—C8      | 134.0 (3)   | C16—C17—C18   | 108.3 (2)  |
| C3—C7—C8      | 119.2 (3)   | C16—C17—H171  | 110.9      |
| C7—C8—C9      | 118.5 (3)   | C18—C17—H171  | 107.3      |
| C7—C8—H81     | 120.6       | C16—C17—H172  | 110.8      |
| C9—C8—H81     | 120.8       | C18—C17—H172  | 110.4      |
| C8—C9—C10     | 122.1 (3)   | H171—C17—H172 | 109.0      |
| C8—C9—H91     | 117.7       | C17—C18—C19   | 115.2 (2)  |
| C10—C9—H91    | 120.1       | C17—C18—H181  | 110.1      |
| C9—C10—C2     | 120.1 (3)   | C19—C18—H181  | 104.1      |
| C9—C10—H101   | 120.0       | C17—C18—H182  | 110.5      |
| C2—C10—H101   | 119.8       | C19—C18—H182  | 106.4      |
| C6—C11—C12    | 108.2 (2)   | H181—C18—H182 | 110.4      |
| C6—C11—H111   | 111.1       | C18—C19—N13   | 120.3 (2)  |
| C12—C11—H111  | 109.4       | C18—C19—O20   | 118.8 (2)  |
| C6—C11—H112   | 110.9       | N13—C19—O20   | 120.9 (3)  |
| C12—C11—H112  | 109.0       | Cl22—C21—Cl23 | 110.61 (6) |
| H111—C11—H112 | 108.2       | Cl22—C21—Cl24 | 110.54 (6) |
| C11—C12—N13   | 110.4 (2)   | Cl23—C21—Cl24 | 110.61 (6) |
| C11—C12—H121  | 108.5       | Cl22—C21—H211 | 107.9      |
| N13—C12—H121  | 108.3       | Cl23—C21—H211 | 108.7      |
| C11—C12—H122  | 112.6       | Cl24—C21—H211 | 108.5      |
| N13—C12—H122  | 108.7       | Cl26—C25—Cl27 | 110.58 (6) |
| H121—C12—H122 | 108.3       | Cl26—C25—Cl28 | 110.60 (6) |
| C12—N13—C14   | 116.3 (2)   | Cl27—C25—Cl28 | 110.59 (6) |
| C12—N13—C19   | 119.0 (2)   | Cl26—C25—H251 | 108.9      |
| C14—N13—C19   | 124.7 (2)   | Cl27—C25—H251 | 108.4      |
| C5—C14—N13    | 105.81 (19) | Cl28—C25—H251 | 107.6      |
| C5—C14—C15    | 110.8 (2)   |               |            |

Hydrogen-bond geometry ( $\text{\AA}$ ,  $^\circ$ )

| <i>D</i> —H $\cdots$ <i>A</i>      | <i>D</i> —H | H $\cdots$ <i>A</i> | <i>D</i> $\cdots$ <i>A</i> | <i>D</i> —H $\cdots$ <i>A</i> |
|------------------------------------|-------------|---------------------|----------------------------|-------------------------------|
| C16—H161 $\cdots$ O20 <sup>i</sup> | 0.96        | 2.33                | 3.229 (4)                  | 155 (1)                       |
| C21—H211 $\cdots$ C7               | 0.97        | 2.55                | 3.511 (4)                  | 170 (1)                       |
| C25—H211 $\cdots$ C7               | 1.11        | 2.55                | 3.517 (4)                  | 145 (1)                       |
| C25—H251 $\cdots$ C7               | 0.98        | 2.60                | 3.517 (4)                  | 157 (1)                       |
| N4—H41 $\cdots$ O20 <sup>i</sup>   | 0.84        | 1.99                | 2.809 (4)                  | 166 (1)                       |

Symmetry code: (i)  $-x+1/2, -y+1, z+1/2$ .

## 5.2. X-Ray data for compound 15a

### 11-(3-bromobenzyl)-11b-methyl-1,2,5,6,11,11b-hexahydro[1,2]thiazolo[2',3':1,2]pyrido[3,4-b]indole 3,3-dioxide

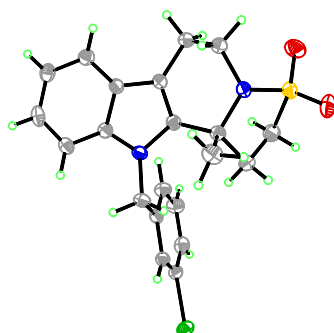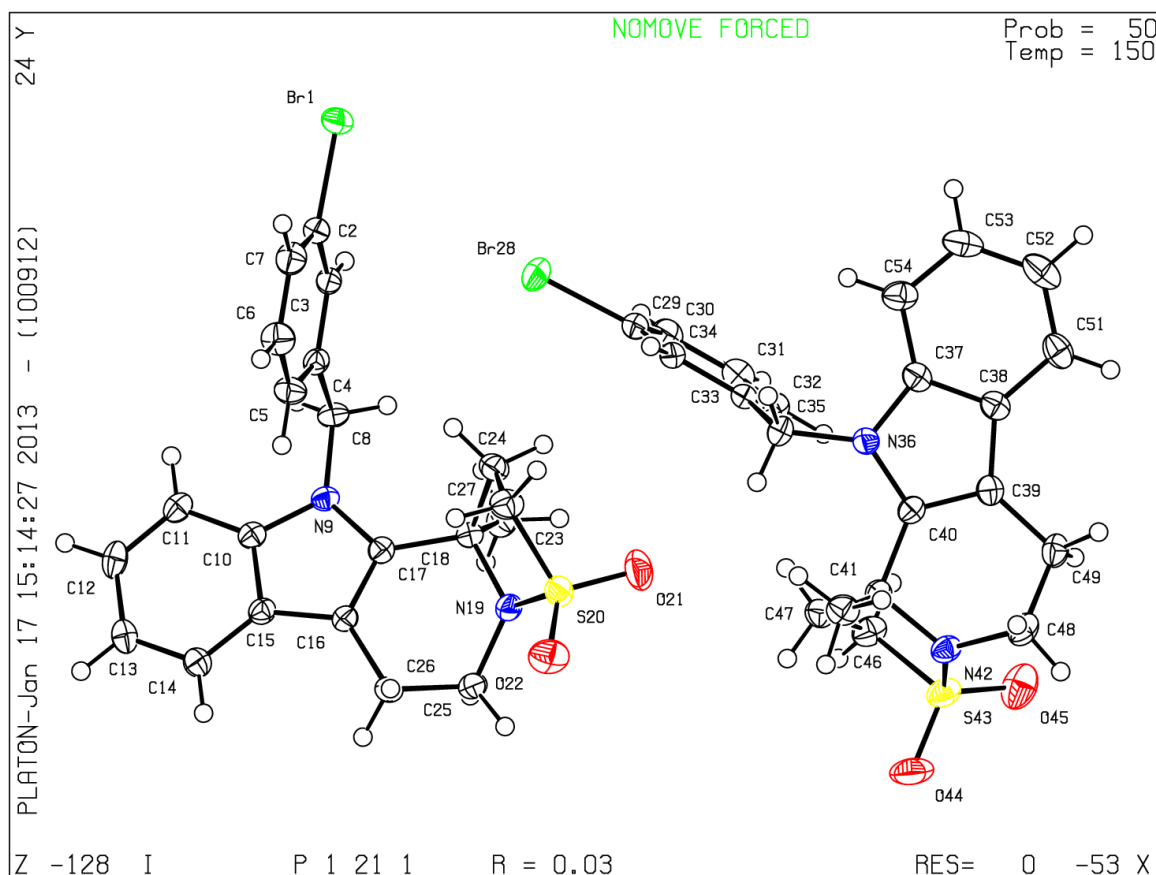

### (15a)

#### Crystal data

$C_{21}H_{21}BrN_2O_2S$

$F(000) = 912$

$M_r = 445.38$   
 Monoclinic,  $P2_1$   
 Hall symbol: P 2yb  
 $a = 10.4507 (1) \text{ \AA}$   
 $b = 16.2752 (2) \text{ \AA}$   
 $c = 11.5043 (1) \text{ \AA}$   
 $\beta = 101.0903 (5)^\circ$   
 $V = 1920.19 (3) \text{ \AA}^3$   
 $Z = 4$

$D_x = 1.541 \text{ Mg m}^{-3}$   
 Melting point: not measured K  
 Mo  $K\alpha$  radiation,  $\lambda = 0.71073 \text{ \AA}$   
 Cell parameters from 4512 reflections  
 $\theta = 5\text{--}27^\circ$   
 $\mu = 2.27 \text{ mm}^{-1}$   
 $T = 150 \text{ K}$   
 Block, Clear\_pale\_colourless  
 $0.50 \times 0.30 \times 0.15 \text{ mm}$

#### Data collection

Nonius KappaCCD  
 diffractometer  
 Graphite monochromator  
 $\omega$  scans  
 Absorption correction: Multi-scan  
 DENZO/SCALEPACK (Otwinowski & Minor, 1997)  
 $T_{\min} = 0.54, T_{\max} = 0.71$   
 35947 measured reflections  
 8412 independent reflections

7894 reflections with  $I > 2.0\sigma(I)$   
 $R_{\text{int}} = 0.063$   
 $\theta_{\max} = 27.5^\circ, \theta_{\min} = 5.1^\circ$   
 $h = -13 \rightarrow 13$   
 $k = -21 \rightarrow 19$   
 $l = -14 \rightarrow 14$

#### Refinement

Refinement on  $F^2$   
 Least-squares matrix: Full  
 $R[F^2 > 2\sigma(F^2)] = 0.029$   
 $wR(F^2) = 0.064$   
 $S = 0.99$   
 8412 reflections  
 488 parameters  
 1 restraint  
 Primary atom site location: Structure-invariant direct methods

Hydrogen site location: Difference Fourier map  
 H-atom parameters constrained  
 Method = Modified Sheldrick  $w = 1/[\sigma^2(F^2) + (0.03P)^2 + 1.16P]$ ,  
 where  $P = (\max(F_o^2, 0) + 2F_c^2)/3$   
 $(\Delta/\sigma)_{\max} = 0.001$   
 $\Delta\rho_{\max} = 1.11 \text{ e \AA}^{-3}$   
 $\Delta\rho_{\min} = -0.93 \text{ e \AA}^{-3}$   
 Absolute structure: Flack (1983), 3898 Friedel-pairs  
 Flack parameter: 0.010 (4)

#### Fractional atomic coordinates and isotropic or equivalent isotropic displacement parameters ( $\text{\AA}^2$ )

|     | x            | y            | z            | $U_{\text{iso}}^*/U_{\text{eq}}$ |
|-----|--------------|--------------|--------------|----------------------------------|
| Br1 | 1.41297 (2)  | 0.38134 (3)  | 0.34172 (2)  | 0.0285                           |
| C2  | 1.3005 (2)   | 0.46900 (15) | 0.2792 (2)   | 0.0226                           |
| C3  | 1.1759 (2)   | 0.45052 (14) | 0.2192 (2)   | 0.0208                           |
| C4  | 1.0911 (2)   | 0.51396 (14) | 0.1758 (2)   | 0.0205                           |
| C5  | 1.1330 (2)   | 0.59512 (15) | 0.1918 (2)   | 0.0256                           |
| C6  | 1.2588 (3)   | 0.61223 (16) | 0.2519 (2)   | 0.0295                           |
| C7  | 1.3438 (2)   | 0.54976 (17) | 0.2968 (2)   | 0.0287                           |
| C8  | 0.9538 (2)   | 0.49079 (14) | 0.1142 (2)   | 0.0228                           |
| N9  | 0.86899 (18) | 0.56083 (12) | 0.08136 (17) | 0.0205                           |
| C10 | 0.8749 (2)   | 0.60797 (14) | -0.0176 (2)  | 0.0206                           |
| C11 | 0.9386 (2)   | 0.59243 (16) | -0.1112 (2)  | 0.0245                           |



|      |              |              |              |         |
|------|--------------|--------------|--------------|---------|
| C12  | 0.9203 (3)   | 0.64855 (17) | -0.2034 (2)  | 0.0276  |
| C13  | 0.8431 (2)   | 0.71881 (16) | -0.2021 (2)  | 0.0263  |
| C14  | 0.7847 (2)   | 0.73585 (15) | -0.1068 (2)  | 0.0247  |
| C15  | 0.8018 (2)   | 0.68067 (14) | -0.0121 (2)  | 0.0211  |
| C16  | 0.7523 (2)   | 0.67577 (14) | 0.0958 (2)   | 0.0209  |
| C17  | 0.7947 (2)   | 0.60349 (14) | 0.1504 (2)   | 0.0201  |
| C18  | 0.7553 (2)   | 0.56948 (14) | 0.2609 (2)   | 0.0213  |
| N19  | 0.66573 (19) | 0.63045 (12) | 0.30024 (17) | 0.0222  |
| S20  | 0.72133 (6)  | 0.66744 (5)  | 0.43267 (5)  | 0.0261  |
| O21  | 0.6787 (2)   | 0.61696 (14) | 0.51981 (17) | 0.0420  |
| O22  | 0.6911 (2)   | 0.75361 (12) | 0.43494 (18) | 0.0378  |
| C23  | 0.8865 (3)   | 0.64467 (16) | 0.4315 (2)   | 0.0296  |
| C24  | 0.8725 (3)   | 0.56237 (15) | 0.3669 (2)   | 0.0263  |
| C25  | 0.5806 (2)   | 0.68198 (16) | 0.2122 (2)   | 0.0268  |
| C26  | 0.6594 (2)   | 0.73246 (16) | 0.1396 (2)   | 0.0266  |
| C27  | 0.6827 (3)   | 0.48793 (16) | 0.2380 (3)   | 0.0307  |
| Br28 | 0.97901 (3)  | 0.32754 (3)  | 0.39862 (3)  | 0.0391  |
| C29  | 0.8383 (2)   | 0.32493 (17) | 0.4816 (2)   | 0.0267  |
| C30  | 0.7437 (3)   | 0.26470 (16) | 0.4539 (2)   | 0.0289  |
| C31  | 0.6397 (3)   | 0.26565 (16) | 0.5129 (2)   | 0.0274  |
| C32  | 0.6313 (2)   | 0.32589 (16) | 0.5970 (2)   | 0.0230  |
| C33  | 0.7276 (2)   | 0.38529 (16) | 0.62490 (18) | 0.0207  |
| C34  | 0.8335 (2)   | 0.38422 (16) | 0.56645 (19) | 0.0224  |
| C35  | 0.7227 (2)   | 0.45407 (15) | 0.7126 (2)   | 0.0227  |
| N36  | 0.64904 (19) | 0.43309 (12) | 0.80417 (17) | 0.0219  |
| C37  | 0.6932 (2)   | 0.37513 (16) | 0.89065 (19) | 0.0228  |
| C38  | 0.6024 (2)   | 0.36932 (15) | 0.9660 (2)   | 0.0233  |
| C39  | 0.4999 (2)   | 0.42615 (15) | 0.9219 (2)   | 0.0229  |
| C40  | 0.5304 (2)   | 0.46350 (14) | 0.8242 (2)   | 0.0210  |
| C41  | 0.4522 (2)   | 0.53135 (14) | 0.7525 (2)   | 0.0216  |
| N42  | 0.32641 (19) | 0.53898 (13) | 0.79549 (18) | 0.0241  |
| S43  | 0.20060 (6)  | 0.50210 (5)  | 0.70227 (6)  | 0.0298  |
| O44  | 0.1293 (2)   | 0.56807 (15) | 0.63536 (19) | 0.0477  |
| O45  | 0.1262 (2)   | 0.44851 (15) | 0.76296 (19) | 0.0450  |
| C46  | 0.2931 (2)   | 0.45221 (17) | 0.6100 (2)   | 0.0296  |
| C47  | 0.4093 (2)   | 0.50934 (15) | 0.6192 (2)   | 0.0253  |
| C48  | 0.3300 (3)   | 0.53143 (17) | 0.9239 (2)   | 0.0290  |
| C49  | 0.3814 (2)   | 0.44762 (16) | 0.9713 (2)   | 0.0271  |
| C50  | 0.5235 (3)   | 0.61384 (15) | 0.7699 (2)   | 0.0287  |
| C51  | 0.6273 (3)   | 0.31427 (16) | 1.0623 (2)   | 0.0300  |
| C52  | 0.7391 (3)   | 0.26805 (17) | 1.0798 (2)   | 0.0363  |
| C53  | 0.8298 (3)   | 0.27482 (17) | 1.0041 (2)   | 0.0339  |
| C54  | 0.8077 (2)   | 0.32787 (17) | 0.9083 (2)   | 0.0299  |
| H31  | 1.1491       | 0.3960       | 0.2068       | 0.0270* |
| H51  | 1.0756       | 0.6379       | 0.1623       | 0.0299* |
| H61  | 1.2857       | 0.6670       | 0.2623       | 0.0363* |
| H71  | 1.4282       | 0.5614       | 0.3364       | 0.0342* |
| H81  | 0.9166       | 0.4571       | 0.1684       | 0.0282* |
| H82  | 0.9589       | 0.4601       | 0.0431       | 0.0281* |
| H111 | 0.9921       | 0.5464       | -0.1109      | 0.0302* |

|      |        |        |         |         |
|------|--------|--------|---------|---------|
| H121 | 0.9601 | 0.6385 | -0.2681 | 0.0355* |
| H131 | 0.8301 | 0.7549 | -0.2672 | 0.0273* |
| H141 | 0.7350 | 0.7834 | -0.1051 | 0.0321* |
| H231 | 0.9229 | 0.6857 | 0.3847  | 0.0360* |
| H232 | 0.9390 | 0.6411 | 0.5113  | 0.0359* |
| H241 | 0.8532 | 0.5197 | 0.4199  | 0.0333* |
| H242 | 0.9514 | 0.5494 | 0.3388  | 0.0331* |
| H251 | 0.5302 | 0.7191 | 0.2529  | 0.0329* |
| H252 | 0.5226 | 0.6463 | 0.1588  | 0.0332* |
| H262 | 0.7075 | 0.7748 | 0.1883  | 0.0328* |
| H261 | 0.6021 | 0.7573 | 0.0731  | 0.0329* |
| H272 | 0.6491 | 0.4727 | 0.3074  | 0.0469* |
| H271 | 0.6120 | 0.4938 | 0.1716  | 0.0470* |
| H273 | 0.7424 | 0.4459 | 0.2212  | 0.0471* |
| H301 | 0.7504 | 0.2247 | 0.3964  | 0.0338* |
| H311 | 0.5751 | 0.2252 | 0.4965  | 0.0308* |
| H321 | 0.5599 | 0.3262 | 0.6348  | 0.0293* |
| H341 | 0.9011 | 0.4224 | 0.5859  | 0.0268* |
| H351 | 0.6820 | 0.5011 | 0.6698  | 0.0308* |
| H352 | 0.8113 | 0.4677 | 0.7496  | 0.0309* |
| H462 | 0.2456 | 0.4477 | 0.5289  | 0.0352* |
| H461 | 0.3205 | 0.3981 | 0.6406  | 0.0348* |
| H472 | 0.3853 | 0.5577 | 0.5718  | 0.0322* |
| H471 | 0.4803 | 0.4814 | 0.5922  | 0.0319* |
| H481 | 0.2415 | 0.5390 | 0.9379  | 0.0329* |
| H482 | 0.3877 | 0.5736 | 0.9652  | 0.0330* |
| H491 | 0.4041 | 0.4489 | 1.0576  | 0.0331* |
| H492 | 0.3152 | 0.4064 | 0.9474  | 0.0330* |
| H501 | 0.4693 | 0.6565 | 0.7280  | 0.0460* |
| H502 | 0.5448 | 0.6273 | 0.8528  | 0.0461* |
| H503 | 0.6027 | 0.6101 | 0.7397  | 0.0461* |
| H511 | 0.5675 | 0.3105 | 1.1133  | 0.0423* |
| H521 | 0.7544 | 0.2303 | 1.1425  | 0.0472* |
| H531 | 0.9059 | 0.2427 | 1.0187  | 0.0368* |
| H541 | 0.8669 | 0.3322 | 0.8573  | 0.0380* |

*Atomic displacement parameters ( $\text{\AA}^2$ )*

|     | $U^{11}$     | $U^{22}$     | $U^{33}$     | $U^{12}$     | $U^{13}$    | $U^{23}$     |
|-----|--------------|--------------|--------------|--------------|-------------|--------------|
| Br1 | 0.02460 (11) | 0.03028 (12) | 0.02933 (12) | 0.00474 (10) | 0.00169 (9) | 0.00640 (11) |
| C2  | 0.0225 (11)  | 0.0244 (11)  | 0.0212 (11)  | 0.0034 (9)   | 0.0049 (9)  | 0.0025 (9)   |
| C3  | 0.0221 (11)  | 0.0198 (11)  | 0.0216 (11)  | 0.0010 (9)   | 0.0071 (9)  | 0.0010 (9)   |
| C4  | 0.0211 (11)  | 0.0217 (12)  | 0.0193 (11)  | 0.0015 (9)   | 0.0053 (9)  | -0.0025 (9)  |
| C5  | 0.0250 (12)  | 0.0211 (12)  | 0.0296 (13)  | 0.0010 (10)  | 0.0022 (10) | 0.0006 (10)  |
| C6  | 0.0307 (13)  | 0.0213 (12)  | 0.0357 (14)  | -0.0051 (10) | 0.0047 (11) | -0.0021 (10) |
| C7  | 0.0239 (12)  | 0.0358 (14)  | 0.0255 (12)  | -0.0033 (11) | 0.0029 (10) | -0.0023 (11) |
| C8  | 0.0211 (11)  | 0.0190 (11)  | 0.0275 (12)  | 0.0031 (9)   | 0.0028 (9)  | -0.0028 (9)  |
| N9  | 0.0204 (9)   | 0.0188 (9)   | 0.0222 (10)  | 0.0031 (8)   | 0.0039 (8)  | -0.0018 (8)  |
| C10 | 0.0181 (10)  | 0.0222 (11)  | 0.0208 (11)  | -0.0010 (9)  | 0.0019 (8)  | -0.0024 (9)  |
| C11 | 0.0217 (11)  | 0.0272 (12)  | 0.0252 (12)  | -0.0006 (10) | 0.0062 (9)  | -0.0054 (10) |

|      |              |              |              |              |              |              |
|------|--------------|--------------|--------------|--------------|--------------|--------------|
| C12  | 0.0286 (13)  | 0.0353 (14)  | 0.0207 (12)  | -0.0091 (10) | 0.0097 (10)  | -0.0070 (10) |
| C13  | 0.0293 (13)  | 0.0282 (13)  | 0.0221 (12)  | -0.0063 (11) | 0.0063 (10)  | 0.0017 (10)  |
| C14  | 0.0261 (12)  | 0.0227 (11)  | 0.0256 (12)  | -0.0009 (10) | 0.0059 (10)  | 0.0021 (10)  |
| C15  | 0.0206 (11)  | 0.0223 (11)  | 0.0204 (11)  | 0.0013 (9)   | 0.0040 (9)   | -0.0022 (9)  |
| C16  | 0.0207 (11)  | 0.0223 (11)  | 0.0204 (11)  | 0.0025 (9)   | 0.0056 (9)   | -0.0001 (9)  |
| C17  | 0.0197 (11)  | 0.0213 (11)  | 0.0191 (11)  | -0.0005 (9)  | 0.0033 (9)   | -0.0020 (9)  |
| C18  | 0.0211 (11)  | 0.0206 (11)  | 0.0224 (11)  | 0.0025 (9)   | 0.0051 (9)   | 0.0006 (9)   |
| N19  | 0.0223 (10)  | 0.0258 (10)  | 0.0189 (9)   | 0.0033 (8)   | 0.0052 (8)   | -0.0012 (8)  |
| S20  | 0.0333 (3)   | 0.0253 (3)   | 0.0204 (3)   | 0.0026 (3)   | 0.0068 (2)   | -0.0016 (2)  |
| O21  | 0.0581 (13)  | 0.0468 (12)  | 0.0250 (10)  | 0.0043 (10)  | 0.0174 (9)   | 0.0065 (9)   |
| O22  | 0.0465 (12)  | 0.0251 (10)  | 0.0408 (11)  | 0.0051 (9)   | 0.0060 (9)   | -0.0097 (8)  |
| C23  | 0.0278 (13)  | 0.0338 (14)  | 0.0250 (13)  | 0.0028 (11)  | -0.0009 (10) | -0.0035 (10) |
| C24  | 0.0294 (13)  | 0.0262 (12)  | 0.0224 (12)  | 0.0048 (10)  | 0.0031 (10)  | 0.0026 (10)  |
| C25  | 0.0240 (12)  | 0.0345 (14)  | 0.0225 (12)  | 0.0092 (10)  | 0.0055 (9)   | 0.0019 (10)  |
| C26  | 0.0300 (13)  | 0.0259 (12)  | 0.0251 (12)  | 0.0092 (10)  | 0.0083 (10)  | 0.0045 (10)  |
| C27  | 0.0299 (13)  | 0.0255 (13)  | 0.0386 (15)  | -0.0049 (10) | 0.0113 (11)  | -0.0017 (11) |
| Br28 | 0.04223 (16) | 0.04041 (15) | 0.04193 (16) | 0.01248 (13) | 0.02604 (12) | 0.00676 (13) |
| C29  | 0.0299 (12)  | 0.0266 (11)  | 0.0256 (12)  | 0.0087 (11)  | 0.0104 (9)   | 0.0067 (10)  |
| C30  | 0.0406 (15)  | 0.0255 (12)  | 0.0206 (12)  | 0.0056 (11)  | 0.0056 (10)  | -0.0031 (10) |
| C31  | 0.0311 (13)  | 0.0233 (12)  | 0.0257 (12)  | -0.0036 (10) | 0.0004 (10)  | -0.0011 (10) |
| C32  | 0.0221 (11)  | 0.0242 (11)  | 0.0229 (11)  | 0.0000 (10)  | 0.0045 (9)   | 0.0030 (10)  |
| C33  | 0.0203 (10)  | 0.0216 (10)  | 0.0198 (10)  | 0.0025 (10)  | 0.0032 (8)   | 0.0033 (10)  |
| C34  | 0.0206 (10)  | 0.0237 (11)  | 0.0235 (10)  | 0.0018 (10)  | 0.0061 (8)   | 0.0046 (10)  |
| C35  | 0.0211 (11)  | 0.0245 (12)  | 0.0238 (12)  | -0.0027 (9)  | 0.0076 (9)   | -0.0021 (9)  |
| N36  | 0.0241 (10)  | 0.0210 (10)  | 0.0210 (10)  | 0.0024 (8)   | 0.0056 (8)   | 0.0009 (8)   |
| C37  | 0.0288 (11)  | 0.0205 (11)  | 0.0176 (10)  | -0.0001 (11) | 0.0012 (8)   | -0.0038 (9)  |
| C38  | 0.0268 (11)  | 0.0230 (12)  | 0.0185 (10)  | -0.0006 (10) | -0.0001 (9)  | -0.0027 (9)  |
| C39  | 0.0251 (12)  | 0.0239 (12)  | 0.0193 (11)  | -0.0024 (9)  | 0.0036 (9)   | -0.0024 (9)  |
| C40  | 0.0204 (11)  | 0.0214 (11)  | 0.0213 (11)  | -0.0007 (9)  | 0.0044 (9)   | -0.0035 (9)  |
| C41  | 0.0252 (12)  | 0.0207 (11)  | 0.0193 (11)  | 0.0018 (9)   | 0.0056 (9)   | -0.0021 (9)  |
| N42  | 0.0234 (10)  | 0.0258 (10)  | 0.0230 (10)  | 0.0036 (8)   | 0.0044 (8)   | -0.0047 (8)  |
| S43  | 0.0215 (3)   | 0.0392 (4)   | 0.0274 (3)   | 0.0046 (3)   | 0.0012 (2)   | -0.0061 (3)  |
| O44  | 0.0384 (11)  | 0.0639 (15)  | 0.0374 (11)  | 0.0288 (11)  | -0.0014 (9)  | -0.0022 (10) |
| O45  | 0.0324 (10)  | 0.0618 (14)  | 0.0418 (11)  | -0.0150 (10) | 0.0094 (9)   | -0.0119 (10) |
| C46  | 0.0263 (13)  | 0.0342 (14)  | 0.0270 (13)  | 0.0038 (11)  | 0.0021 (10)  | -0.0089 (11) |
| C47  | 0.0301 (13)  | 0.0265 (12)  | 0.0185 (11)  | 0.0045 (10)  | 0.0032 (9)   | -0.0013 (9)  |
| C48  | 0.0285 (13)  | 0.0356 (14)  | 0.0242 (12)  | 0.0016 (11)  | 0.0082 (10)  | -0.0088 (10) |
| C49  | 0.0254 (12)  | 0.0358 (14)  | 0.0208 (12)  | -0.0038 (11) | 0.0063 (9)   | -0.0017 (10) |
| C50  | 0.0325 (13)  | 0.0211 (12)  | 0.0326 (13)  | 0.0005 (10)  | 0.0068 (11)  | -0.0024 (10) |
| C51  | 0.0403 (14)  | 0.0284 (13)  | 0.0198 (11)  | -0.0037 (11) | 0.0022 (10)  | -0.0004 (10) |
| C52  | 0.0541 (18)  | 0.0255 (13)  | 0.0247 (13)  | 0.0014 (12)  | -0.0037 (12) | 0.0015 (10)  |
| C53  | 0.0378 (15)  | 0.0278 (13)  | 0.0309 (14)  | 0.0115 (11)  | -0.0060 (11) | -0.0032 (11) |
| C54  | 0.0316 (13)  | 0.0286 (12)  | 0.0275 (12)  | 0.0061 (11)  | 0.0007 (10)  | -0.0062 (11) |

*Geometric parameters (Å, °)*

|        |           |          |           |
|--------|-----------|----------|-----------|
| Br1—C2 | 1.900 (2) | Br28—C29 | 1.901 (2) |
| C2—C3  | 1.385 (3) | C29—C30  | 1.386 (4) |
| C2—C7  | 1.392 (4) | C29—C34  | 1.381 (4) |
| C3—C4  | 1.389 (3) | C30—C31  | 1.387 (4) |

|           |             |              |             |
|-----------|-------------|--------------|-------------|
| C3—H31    | 0.933       | C30—H301     | 0.940       |
| C4—C5     | 1.393 (3)   | C31—C32      | 1.392 (4)   |
| C4—C8     | 1.521 (3)   | C31—H311     | 0.936       |
| C5—C6     | 1.390 (4)   | C32—C33      | 1.388 (3)   |
| C5—H51    | 0.938       | C32—H321     | 0.934       |
| C6—C7     | 1.383 (4)   | C33—C34      | 1.401 (3)   |
| C6—H61    | 0.936       | C33—C35      | 1.514 (3)   |
| C7—H71    | 0.931       | C34—H341     | 0.935       |
| C8—N9     | 1.449 (3)   | C35—N36      | 1.460 (3)   |
| C8—H81    | 0.967       | C35—H351     | 0.963       |
| C8—H82    | 0.969       | C35—H352     | 0.968       |
| N9—C10    | 1.384 (3)   | N36—C37      | 1.384 (3)   |
| N9—C17    | 1.397 (3)   | N36—C40      | 1.395 (3)   |
| C10—C11   | 1.394 (3)   | C37—C38      | 1.406 (3)   |
| C10—C15   | 1.416 (3)   | C37—C54      | 1.404 (3)   |
| C11—C12   | 1.384 (4)   | C38—C39      | 1.432 (3)   |
| C11—H111  | 0.934       | C38—C51      | 1.410 (3)   |
| C12—C13   | 1.401 (4)   | C39—C40      | 1.368 (3)   |
| C12—H121  | 0.935       | C39—C49      | 1.500 (3)   |
| C13—C14   | 1.382 (4)   | C40—C41      | 1.519 (3)   |
| C13—H131  | 0.941       | C41—N42      | 1.497 (3)   |
| C14—C15   | 1.396 (3)   | C41—C47      | 1.554 (3)   |
| C14—H141  | 0.934       | C41—C50      | 1.529 (3)   |
| C15—C16   | 1.437 (3)   | N42—S43      | 1.642 (2)   |
| C16—C17   | 1.367 (3)   | N42—C48      | 1.475 (3)   |
| C16—C26   | 1.495 (3)   | S43—O44      | 1.442 (2)   |
| C17—C18   | 1.515 (3)   | S43—O45      | 1.436 (2)   |
| C18—N19   | 1.493 (3)   | S43—C46      | 1.765 (3)   |
| C18—C24   | 1.557 (3)   | C46—C47      | 1.517 (4)   |
| C18—C27   | 1.526 (3)   | C46—H462     | 0.972       |
| N19—S20   | 1.637 (2)   | C46—H461     | 0.971       |
| N19—C25   | 1.475 (3)   | C47—H472     | 0.963       |
| S20—O21   | 1.432 (2)   | C47—H471     | 0.971       |
| S20—O22   | 1.4389 (19) | C48—C49      | 1.528 (4)   |
| S20—C23   | 1.768 (3)   | C48—H481     | 0.977       |
| C23—C24   | 1.525 (4)   | C48—H482     | 0.975       |
| C23—H231  | 0.980       | C49—H491     | 0.976       |
| C23—H232  | 0.976       | C49—H492     | 0.965       |
| C24—H241  | 0.971       | C50—H501     | 0.964       |
| C24—H242  | 0.966       | C50—H502     | 0.962       |
| C25—C26   | 1.522 (3)   | C50—H503     | 0.960       |
| C25—H251  | 0.978       | C51—C52      | 1.372 (4)   |
| C25—H252  | 0.969       | C51—H511     | 0.938       |
| C26—H262  | 0.966       | C52—C53      | 1.409 (4)   |
| C26—H261  | 0.964       | C52—H521     | 0.938       |
| C27—H272  | 0.964       | C53—C54      | 1.384 (4)   |
| C27—H271  | 0.960       | C53—H531     | 0.940       |
| C27—H273  | 0.970       | C54—H541     | 0.933       |
| Br1—C2—C3 | 118.66 (18) | Br28—C29—C30 | 119.17 (19) |

|              |             |               |             |
|--------------|-------------|---------------|-------------|
| Br1—C2—C7    | 119.59 (18) | Br28—C29—C34  | 118.45 (19) |
| C3—C2—C7     | 121.7 (2)   | C30—C29—C34   | 122.4 (2)   |
| C2—C3—C4     | 119.4 (2)   | C29—C30—C31   | 118.1 (2)   |
| C2—C3—H31    | 120.6       | C29—C30—H301  | 120.3       |
| C4—C3—H31    | 120.0       | C31—C30—H301  | 121.6       |
| C3—C4—C5     | 119.7 (2)   | C30—C31—C32   | 120.5 (2)   |
| C3—C4—C8     | 117.6 (2)   | C30—C31—H311  | 119.7       |
| C5—C4—C8     | 122.8 (2)   | C32—C31—H311  | 119.8       |
| C4—C5—C6     | 119.9 (2)   | C31—C32—C33   | 120.8 (2)   |
| C4—C5—H51    | 119.5       | C31—C32—H321  | 119.4       |
| C6—C5—H51    | 120.6       | C33—C32—H321  | 119.8       |
| C5—C6—C7     | 121.1 (2)   | C32—C33—C34   | 119.0 (2)   |
| C5—C6—H61    | 119.1       | C32—C33—C35   | 123.6 (2)   |
| C7—C6—H61    | 119.8       | C34—C33—C35   | 117.4 (2)   |
| C2—C7—C6     | 118.2 (2)   | C33—C34—C29   | 119.2 (2)   |
| C2—C7—H71    | 121.0       | C33—C34—H341  | 120.5       |
| C6—C7—H71    | 120.8       | C29—C34—H341  | 120.3       |
| C4—C8—N9     | 113.68 (19) | C33—C35—N36   | 113.44 (19) |
| C4—C8—H81    | 107.5       | C33—C35—H351  | 108.4       |
| N9—C8—H81    | 108.3       | N36—C35—H351  | 108.2       |
| C4—C8—H82    | 108.7       | C33—C35—H352  | 108.1       |
| N9—C8—H82    | 108.4       | N36—C35—H352  | 109.2       |
| H81—C8—H82   | 110.3       | H351—C35—H352 | 109.5       |
| C8—N9—C10    | 121.95 (19) | C35—N36—C37   | 121.92 (19) |
| C8—N9—C17    | 128.4 (2)   | C35—N36—C40   | 130.2 (2)   |
| C10—N9—C17   | 108.04 (18) | C37—N36—C40   | 107.90 (19) |
| N9—C10—C11   | 129.7 (2)   | N36—C37—C38   | 108.5 (2)   |
| N9—C10—C15   | 108.5 (2)   | N36—C37—C54   | 129.4 (2)   |
| C11—C10—C15  | 121.9 (2)   | C38—C37—C54   | 122.1 (2)   |
| C10—C11—C12  | 117.1 (2)   | C37—C38—C39   | 106.6 (2)   |
| C10—C11—H111 | 121.1       | C37—C38—C51   | 118.8 (2)   |
| C12—C11—H111 | 121.8       | C39—C38—C51   | 134.6 (2)   |
| C11—C12—C13  | 121.7 (2)   | C38—C39—C40   | 107.6 (2)   |
| C11—C12—H121 | 118.5       | C38—C39—C49   | 129.2 (2)   |
| C13—C12—H121 | 119.8       | C40—C39—C49   | 123.2 (2)   |
| C12—C13—C14  | 121.0 (2)   | N36—C40—C39   | 109.4 (2)   |
| C12—C13—H131 | 119.8       | N36—C40—C41   | 124.8 (2)   |
| C14—C13—H131 | 119.2       | C39—C40—C41   | 125.7 (2)   |
| C13—C14—C15  | 118.7 (2)   | C40—C41—N42   | 107.20 (18) |
| C13—C14—H141 | 121.0       | C40—C41—C47   | 113.02 (19) |
| C15—C14—H141 | 120.4       | N42—C41—C47   | 103.86 (18) |
| C10—C15—C14  | 119.5 (2)   | C40—C41—C50   | 111.70 (19) |
| C10—C15—C16  | 106.2 (2)   | N42—C41—C50   | 108.67 (19) |
| C14—C15—C16  | 134.1 (2)   | C47—C41—C50   | 111.9 (2)   |
| C15—C16—C17  | 107.8 (2)   | C41—N42—S43   | 113.44 (15) |
| C15—C16—C26  | 128.5 (2)   | C41—N42—C48   | 117.98 (19) |
| C17—C16—C26  | 123.4 (2)   | S43—N42—C48   | 119.11 (17) |
| N9—C17—C16   | 109.5 (2)   | N42—S43—O44   | 110.06 (13) |
| N9—C17—C18   | 124.5 (2)   | N42—S43—O45   | 110.16 (12) |
| C16—C17—C18  | 125.7 (2)   | O44—S43—O45   | 116.07 (14) |

|               |             |               |             |
|---------------|-------------|---------------|-------------|
| C17—C18—N19   | 107.40 (18) | N42—S43—C46   | 95.66 (11)  |
| C17—C18—C24   | 112.60 (19) | O44—S43—C46   | 107.95 (13) |
| N19—C18—C24   | 104.89 (19) | O45—S43—C46   | 115.04 (14) |
| C17—C18—C27   | 112.3 (2)   | S43—C46—C47   | 101.51 (17) |
| N19—C18—C27   | 108.10 (19) | S43—C46—H462  | 112.0       |
| C24—C18—C27   | 111.1 (2)   | C47—C46—H462  | 111.6       |
| C18—N19—S20   | 113.29 (15) | S43—C46—H461  | 110.9       |
| C18—N19—C25   | 120.05 (18) | C47—C46—H461  | 110.7       |
| S20—N19—C25   | 119.29 (16) | H462—C46—H461 | 109.9       |
| N19—S20—O21   | 109.75 (12) | C41—C47—C46   | 106.6 (2)   |
| N19—S20—O22   | 109.60 (11) | C41—C47—H472  | 111.4       |
| O21—S20—O22   | 116.58 (13) | C46—C47—H472  | 110.1       |
| N19—S20—C23   | 95.05 (11)  | C41—C47—H471  | 109.3       |
| O21—S20—C23   | 108.72 (13) | C46—C47—H471  | 109.9       |
| O22—S20—C23   | 115.00 (13) | H472—C47—H471 | 109.4       |
| S20—C23—C24   | 100.68 (17) | N42—C48—C49   | 111.8 (2)   |
| S20—C23—H231  | 110.1       | N42—C48—H481  | 108.2       |
| C24—C23—H231  | 110.0       | C49—C48—H481  | 109.4       |
| S20—C23—H232  | 112.2       | N42—C48—H482  | 108.9       |
| C24—C23—H232  | 113.0       | C49—C48—H482  | 108.2       |
| H231—C23—H232 | 110.5       | H481—C48—H482 | 110.3       |
| C23—C24—C18   | 107.68 (19) | C48—C49—C39   | 109.4 (2)   |
| C23—C24—H241  | 109.5       | C48—C49—H491  | 110.1       |
| C18—C24—H241  | 108.6       | C39—C49—H491  | 109.5       |
| C23—C24—H242  | 110.3       | C48—C49—H492  | 109.6       |
| C18—C24—H242  | 110.4       | C39—C49—H492  | 109.2       |
| H241—C24—H242 | 110.3       | H491—C49—H492 | 109.0       |
| N19—C25—C26   | 111.43 (19) | C41—C50—H501  | 110.0       |
| N19—C25—H251  | 109.4       | C41—C50—H502  | 110.1       |
| C26—C25—H251  | 109.1       | H501—C50—H502 | 109.5       |
| N19—C25—H252  | 108.4       | C41—C50—H503  | 109.2       |
| C26—C25—H252  | 108.3       | H501—C50—H503 | 109.2       |
| H251—C25—H252 | 110.2       | H502—C50—H503 | 108.8       |
| C25—C26—C16   | 107.9 (2)   | C38—C51—C52   | 119.1 (2)   |
| C25—C26—H262  | 110.1       | C38—C51—H511  | 119.2       |
| C16—C26—H262  | 109.7       | C52—C51—H511  | 121.7       |
| C25—C26—H261  | 110.0       | C51—C52—C53   | 121.5 (2)   |
| C16—C26—H261  | 109.6       | C51—C52—H521  | 119.1       |
| H262—C26—H261 | 109.6       | C53—C52—H521  | 119.4       |
| C18—C27—H272  | 109.2       | C52—C53—C54   | 120.8 (2)   |
| C18—C27—H271  | 109.4       | C52—C53—H531  | 119.5       |
| H272—C27—H271 | 109.7       | C54—C53—H531  | 119.7       |
| C18—C27—H273  | 109.3       | C37—C54—C53   | 117.6 (2)   |
| H272—C27—H273 | 109.5       | C37—C54—H541  | 121.1       |
| H271—C27—H273 | 109.8       | C53—C54—H541  | 121.2       |

Hydrogen-bond geometry ( $\text{\AA}$ ,  $^\circ$ )

| $D-H\cdots A$                             | $D-H$ | $H\cdots A$ | $D\cdots A$ | $D-H\cdots A$ |
|-------------------------------------------|-------|-------------|-------------|---------------|
| C12—H121 <sup>i</sup> ...O44 <sup>i</sup> | 0.94  | 2.54        | 3.390 (4)   | 152           |

|                               |      |      |           |     |
|-------------------------------|------|------|-----------|-----|
| C23—H232...O44 <sup>ii</sup>  | 0.98 | 2.51 | 3.347 (4) | 143 |
| C35—H351...O21                | 0.96 | 2.55 | 3.430 (4) | 152 |
| C46—H461...O22 <sup>iii</sup> | 0.97 | 2.50 | 3.282 (4) | 137 |

Symmetry codes: (i)  $x+1, y, z-1$ ; (ii)  $x+1, y, z$ ; (iii)  $-x+1, y-1/2, -z+1$ .

For both compounds, data collection: *COLLECT* (Nonius, 2001).; cell refinement: *DENZO/SCALEPACK* (Otwinowski & Minor, 1997); data reduction: *DENZO/SCALEPACK* (Otwinowski & Minor, 1997). Program(s) used to solve structure: Superflip (Palatinus & Chapuis, 2007) for (10b); *SIR92* (Altomare *et al.*, 1994) for (15a). For both compounds, program(s) used to refine structure: *CRYSTALS* (Betteridge *et al.*, 2003); molecular graphics: *CAMERON* (Watkin *et al.*, 1996); software used to prepare material for publication: *CRYSTALS* (Betteridge *et al.*, 2003).

### 5.3. X-ray references

Betteridge, P. W., Carruthers, J. R., Cooper, R. I., Prout, K. & Watkin, D. J. (2003). *J. Appl. Cryst.* 36, 1487.

Flack, H. D. (1983). *Acta Cryst.* A39, 876-881.

Nonius (2001). *COLLECT*. Nonius BV, Delft, The Netherlands.

## 6. References

<sup>1</sup> P. Wipf, J. K. Jung. *J. Org. Chem.* **2000**, 65, 6319-6337

<sup>2</sup> R. I. Storer, D. E. Carrera, Y. Ni, D. W. C. MacMillan. *J. Am. Chem. Soc.* **2006**, 128, 84-86

<sup>3</sup> K. Maruoka, T. Itoh, Y. Araki, T. Shirasaka, H. Yamamoto. *Bull. Chem. Soc. Jpn.* **1988**, 61, 2975-2976

<sup>4</sup> M. E. Muratore, C. A. Holloway, A. W. Pilling, R. I. Storer, G. Trevitt, D. J. Dixon. *J. Am. Chem. Soc.* **2009**, 131, 31, 10796–10797

<sup>5</sup> M. E. Muratore, L. Shi, A. W. Pilling, R. I. Storer, D. J. Dixon. *Chem. Commun.* **2012**, Advance Article

<sup>6</sup> F. Hadjaz, S. Besret, S. Yous, S. Dilly, N. Lebegue, P. Chavatte, P. Berthelot, P. Carato, F. Martin-Nizard, P. Duriez. *European Journal of Medicinal Chemistry*, **2011**, 46, 6, 2575-2585

<sup>7</sup> T. Newhouse, C. A. Lewis, K. J. Eastman, P. S. Baran. *J. Am. Chem. Soc.* **2010**, 132, 20, 7119-7137

<sup>8</sup> Two step reduction for the preparation of 5-cyano-tryptamine: M. Somel, M. Wakida, T. Ohta. *Chem. Pharm. Bull.* **1988**, 34, 3, 1162-1168.

<sup>9</sup> Sulfonyl chloride formed following literature procedure: F. K. Cheung, A. M. Hayes, D. J. Morris, M. Wills. *Org. Biomol. Chem.* **2007**, 5, 1093–1103

---

<sup>10</sup> S. Chang, M. Lee, D. Y. Jung, E. J. Yoo, S. H. Cho, S. K. Han. *J. Am. Chem. Soc.* **2006**, 128, 38, 12366-12367

<sup>11</sup> Single crystal X-ray diffraction data were collected using a Nonius Kappa CCD diffractometer and data were reduced using Denzo-SMN.<sup>12</sup> The structures were solved with SIR92/SuperFlip<sup>13</sup> and refined with CRYSTALS.<sup>14</sup> The Flack x parameter<sup>15</sup> refined to -0.007(8) and 0.010(4) for **10b** and **15a** respectively. For further information, see ESI (CIF); full crystallographic data have been deposited with the Cambridge Crystallographic Data Centre as supplementary publication numbers CCDC XXXXX-X, respectively. Copies of these data can be obtained free of charge from The Cambridge Crystallographic Data Centre via [www.ccdc.cam.ac.uk/data\\_request/cif](http://www.ccdc.cam.ac.uk/data_request/cif).

<sup>12</sup> Otwinowski, Z.; Minor, W. *Processing of X-ray Diffraction Data Collected in Oscillation Mode, Methods Enzymol.* Carter, C. W, Sweet, R. M, Eds.; Academic Press. **1997**, 276,

<sup>13</sup> a) Altomare, A.; Casciarano, G.; Giacovazzo, C.; Guagliardi, A.; Burla, M. C.; Polidori, G.; Camalli, M.; *J. Appl. Cryst.* **1994**, 27, 435; b) Palatinus, L.; Chapuis, G. *J. Appl. Cryst.* **2007**, 40, 786.

<sup>14</sup> a) Betteridge, P. W.; Carruthers, J. R.; Cooper, R. I.; Prout, K.; Watkin, D. J. *J. Appl. Cryst.* **2003**, 36, 1487; b) Cooper, R. I.; Thompson, A. L.; Watkin, D. J.; *J. Appl. Cryst.* **2010**, 43, 1100.

<sup>15</sup> a) Flack, H. D. *Acta Cryst.* **1983**, A39, 876; b) Thompson, A. L.; Watkin, D. J. *J. Appl. Cryst.* **2011**, 44, 1017.
